# Supplementary material for: Rh(iii)-catalyzed alkynylation: synthesis of functionalized quinolines from aminohydrazones
Source: Royal Society of Chemistry journal article supplement (doi:10.1039/c9cc06205j), 2019-01-01
Supplement: c9cc06205j1.pdf [file c9cc06205j1.pdf]

# Supporting Information

## Rh(III)-Catalyzed Alkynylation: Synthesis of Functionalized Quinolines from Aminohydrazones

Pradeep Kumar,<sup>#</sup>Vineeta Garg<sup>#</sup> Manoj Kumar and Akhilesh K. Verma\*

Synthetic Organic Chemistry Research Laboratory, Department of Chemistry, University of Delhi, Delhi- 110007, India

| S.No | Contents                                                                                                                        | Page No.  |
|------|---------------------------------------------------------------------------------------------------------------------------------|-----------|
| 1    | General Information and Method                                                                                                  | S2        |
| 2    | X-Ray Crystallographic Studies ( <b>4f</b> ) and References                                                                     | S3-S4     |
| 3    | General Procedure for the Synthesis of hydrazones ( <b>1a-p</b> )                                                               | S5-S11    |
| 4    | General Procedure for the Synthesis of hydrazone ( <b>1a-D<sub>2</sub></b> )                                                    | S11-S12   |
| 5    | General Procedure for the Synthesis of Functionalized Quinolines ( <b>3a-o</b> ), ( <b>4a-j</b> )and( <b>3a-D<sub>2</sub></b> ) | S12-S19   |
| 6    | General Procedure for the Synthesis of Quinolines ( <b>5a-d</b> )                                                               | S20-S21   |
| 7    | Data of Compound ( <b>8a-e</b> )                                                                                                | S21-S22   |
| 8    | Copies of <sup>1</sup> H and <sup>13</sup> C NMR and HRMS                                                                       | S24-S173  |
| 9    | HRMS of Plausible Intermediates                                                                                                 | S174-S176 |

## General Information and Method

All the reactions were performed in an oven dried Schlenk flask under an argon atmosphere. Column chromatography was performed using silica gel (mesh 100-200). TLC analysis was performed on commercially prepared 60 F<sub>254</sub> silica gel plates. Visualization of spots on TLC plate was accomplished with UV light (254 nm) and staining over I<sub>2</sub> chamber. <sup>1</sup>H NMR (400 MHz) and <sup>13</sup>C NMR (100 MHz) spectra were recorded in CDCl<sub>3</sub> and (CD<sub>3</sub>)<sub>2</sub>SO. Chemical shifts for carbons are reported in ppm from tetramethylsilane and are referenced to the carbon resonance of the solvent. Data are reported as follows: chemical shift, multiplicity (s = singlet, d = doublet, t = triplet, q = quartet, m = multiplet, dd = doublet of doublet, br s = broad singlet), coupling constants in Hertz, and integration. High-resolution mass spectra were recorded with q-TOF electrospray mass spectrometer. All purchased chemicals were used as received. All melting points are uncorrected.

### Starting materials (1a–p):

All hydrazones **1a–p** were prepared by the refluxing of various 2-aminoacetophenones with corresponding hydrazines.<sup>5</sup>

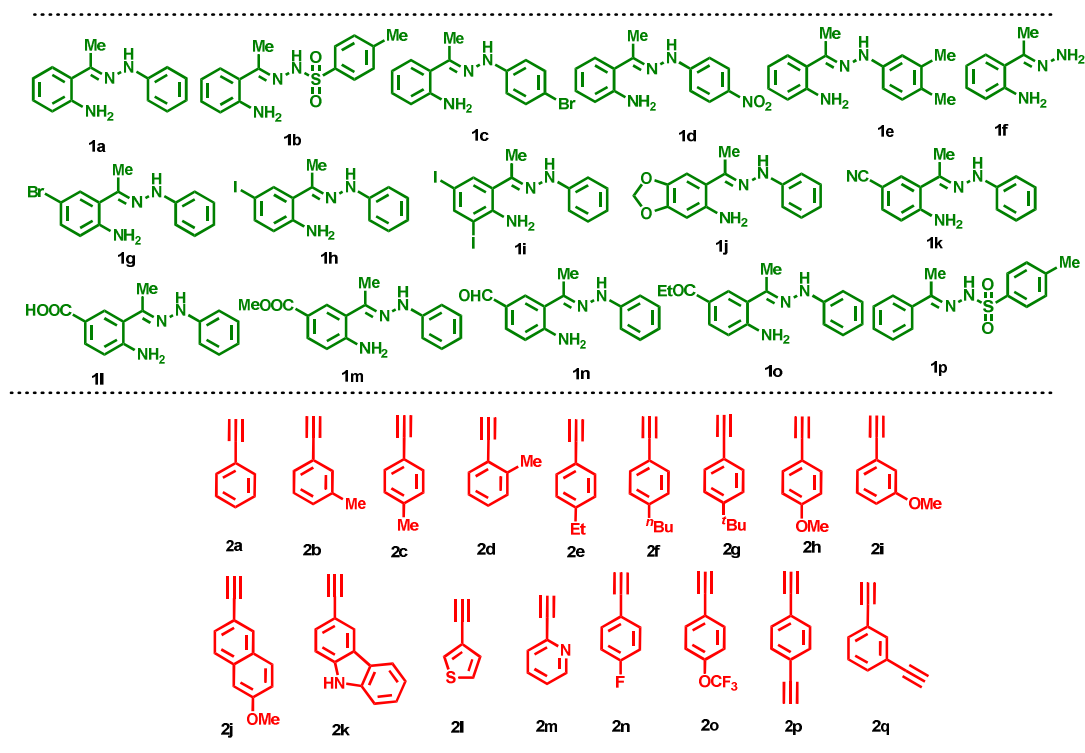

## X-Ray Crystallographic Studies

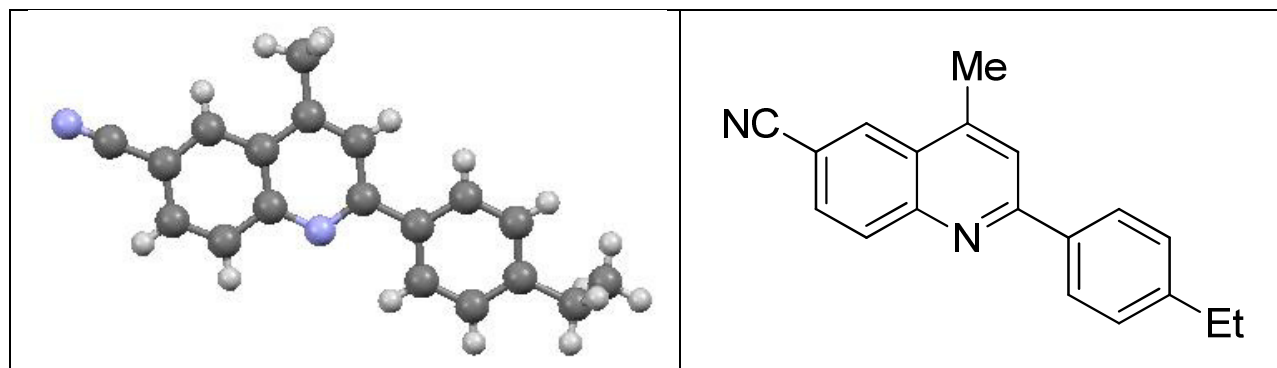

**Figure I.** ORTEP structure of compound **4f**

The crystals of **4f** of suitable quality were obtained from MeOH/CHCl<sub>3</sub>. The compound **4f** crystallized in Monoclinic crystal system with space group P 2<sub>1</sub>/c. The single-crystal X-ray data were collected on an Oxford XCalibur CCD diffractometer using graphite monochromated Mo K $\alpha$  radiation ( $\lambda = 0.71073 \text{ \AA}$ ). The structures was solved using SIR-92 and refined by full matrix least square technique on  $F^2$  using the SHELXL-97<sup>1-4</sup> program within the WinGX v 1.80.05 software package. In **4f** hydrogens are mixed and all non-hydrogen atoms were refined anisotropically. Atomic coordinates, bond lengths, bond angles, and thermal parameters for compounds **4f** has been deposited at the Cambridge Crystallographic Data Centre. CCDC deposit number for **4f** is 1811979.

**Table I.** Crystallographic data and structure refinement for compounds **4f**

|                      |                                                |                       |
|----------------------|------------------------------------------------|-----------------------|
| Identification code  | <b>4f</b>                                      |                       |
| Empirical formula    | C <sub>19</sub> H <sub>16</sub> N <sub>2</sub> |                       |
| Formula weight       | 272.34                                         |                       |
| Temperature          | 298(2) K                                       |                       |
| Wavelength           | 0.71073 $\text{\AA}$                           |                       |
| Crystal system       | Monoclinic                                     |                       |
| Space group          | P 2 <sub>1</sub> /c                            |                       |
| Unit cell dimensions | $a = 8.0245(5) \text{ \AA}$                    | $\alpha = 90^\circ$ . |

|                                        |                                                                    |                             |
|----------------------------------------|--------------------------------------------------------------------|-----------------------------|
|                                        | $b = 12.1560(7) \text{ \AA}$                                       | $\beta = 97.933(2)^\circ$ . |
|                                        | $c = 14.5478(9) \text{ \AA}$                                       | $\gamma = 90^\circ$ .       |
| Volume                                 | $1408.65(15) \text{ \AA}^3$                                        |                             |
| Z                                      | 4                                                                  |                             |
| Density (calculated)                   | $1.33 \text{ g/cm}^3$                                              |                             |
| Absorption coefficient                 | $0.076 \text{ mm}^{-1}$                                            |                             |
| F(000)                                 | 676.0                                                              |                             |
| The range for data collection          | $3.4$ to $25.00^\circ$ .                                           |                             |
| Index ranges                           | $-10 \leq h \leq 10$ , $-16 \leq k \leq 16$ , $-19 \leq l \leq 19$ |                             |
| Reflections collected                  | 9740                                                               |                             |
| Independent reflections                | 3509 [R(int) = 0.0739]                                             |                             |
| Completeness to $\theta = 25.00^\circ$ | 100 %                                                              |                             |
| Max. and min. transmission             | 0.988 and 0.978                                                    |                             |
| Refinement method                      | Full-matrix least-squares on $F^2$                                 |                             |
| Data / restraints / parameters         | 3509 / 0 / 190                                                     |                             |
| Goodness-of-fit on $F^2$               | .787                                                               |                             |
| Final R indices [ $I > 2 \sigma(I)$ ]  | $R1 = 0.0774$ , $wR2 = 0.1911$                                     |                             |
| R indices (all data)                   | $R1 = 0.1204$ , $wR2 = 0.2498$                                     |                             |

\

## References:

1. CrysAlisPro, Agilent Technologies, Version 1.171.34.49, **2011**.
2. Sheldrick, G. M., *Acta Cryst.* **2008**, A64, 112.
3. Farrugia, L. J. WinGX Version 1.80.05, An integrated system of Windows Programs for the Solution, Refinement and Analysis of Single Crystal X-Ray Diffraction Data; Department of Chemistry, University of Glasgow, **1997-2009**.
4. (a) Foresman, J. B.; Frisch, A. E. *Exploring Chemistry with Electronic Structure Methods*; Gaussian, Inc.: Pittsburgh, PA. **1995**. (b) Hehre, W. J., Radom, L., Schleyer, P. V. R.; Pople, J. A. *Ab Initio Molecular Orbital Theory*; Wiley: New York, **1985**.
5. (a) Huang, Z.; Yang, Y.; Xiao, Q.; Zhang, Y.; Wang, J. *Eur. J. Org. Chem.* **2012**, 6586–6593. (b)



## Screening of Different Protecting Groups:

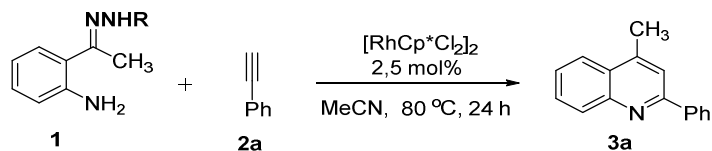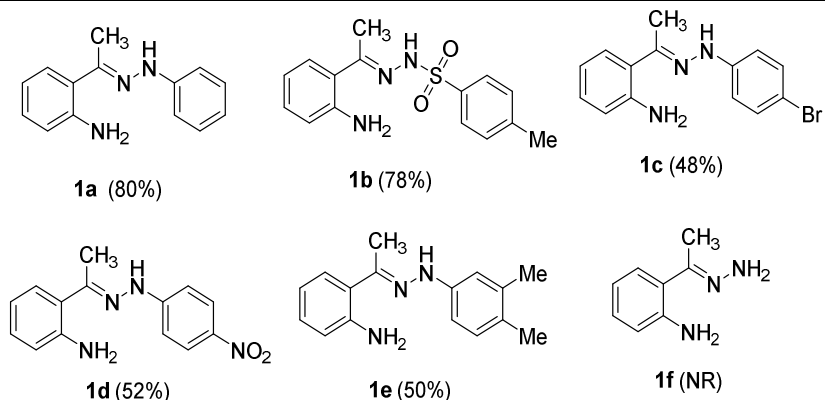

**General Procedure for the Synthesis of hydrazones (1a-k and 1p):** In an oven dried round bottom flask, 2-aminoacetophenones/aminoacetophenone **A** (0.5 mmol), PTSA (5.0 mol%) and corresponding hydrazine **B** (0.5 mmol) refluxed in 2.0 mL of EtOH for 3-12 h. Progression of the reaction was monitored by TLC, while noticing complete consumption of starting substrate, reaction was brought to room temperature. The reaction mixture was dried under reduced pressure. The crude material was purified by hexane washing to obtain hydrazones **1a-k** and **1p**.

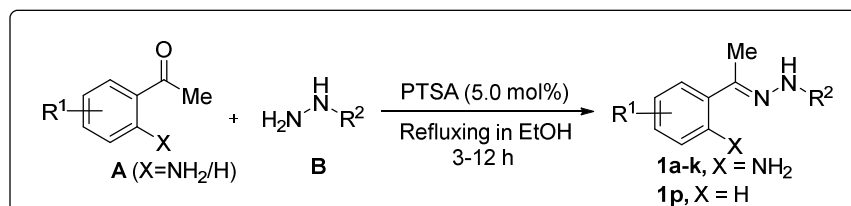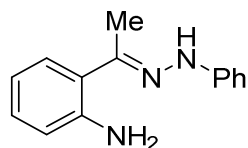

**(E)-2-(1-(2-Phenylhydrazono) ethyl)aniline (1a).** The product was obtained

as a white needles (105.7 mg, 94%): mp 210–214 °C;  $^1\text{H}$  NMR (400 MHz,  $\text{DMSO}-d_6$ )  $\delta$  9.13 (br s, 1H), 7.34 (d,  $J = 8.4$  Hz, 1H), 7.22 (t,  $J = 6.9$  Hz, 2H), 7.08 (d,  $J = 7.6$  Hz, 2H), 7.00 (t,  $J = 6.9$  Hz, 1H), 6.83 (br s, 1H), 6.77–6.72 (m, 3H), 6.59 (t,  $J = 6.9$  Hz, 1H), 2.28 (s, 3H);  $^{13}\text{C}$  NMR

(100 MHz, DMSO-*d*<sub>6</sub>)  $\delta$  146.0, 145.8, 145.6, 129.1, 128.2, 128.1, 120.3, 118.8, 116.1, 115.7, 112.4, 14.6; HRMS (ESI-TOF)  $[M+H]^+$  Calcd for  $[C_{14}H_{15}N_3]$  226.1344, found 226.1335.

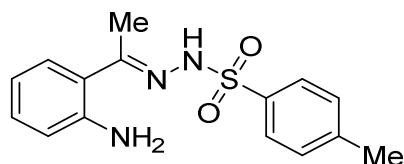

**(*E*)-*N'*-(1-(2-Aminophenyl)ethylidene)-4-**

**methylbenzenesulfonohydrazide (1b).** The product was obtained as a light yellow needles (128.9 mg, 85%): mp 215–219 °C; <sup>1</sup>H NMR (400 MHz, DMSO-*d*<sub>6</sub>)  $\delta$  10.51 (br s, 1H), 7.77 (dd, *J* = 7.6, 1.5 Hz, 2H), 7.38 (d, *J* = 7.6 Hz, 2H), 7.28 (d, *J* = 7.6 Hz, 1H), 7.00 (t, *J* = 6.9 Hz, 1H), 6.63 (dd, *J* = 8.4, 1.6 Hz, 1H), 6.54 (br s, 2H), 6.48 (t, *J* = 6.9 Hz, 1H), 2.34 (s, 3H), 2.17 (s, 3H); <sup>13</sup>C NMR (100 MHz, DMSO-*d*<sub>6</sub>)  $\delta$  157.1, 147.3, 143.5, 136.0, 129.7, 129.6, 129.1, 127.4, 117.4, 116.0, 114.8, 21.0, 15.4; HRMS (ESI-TOF)  $[M+H]^+$  Calcd for  $[C_{15}H_{17}N_3O_2S]$  304.1120, found 304.1109.

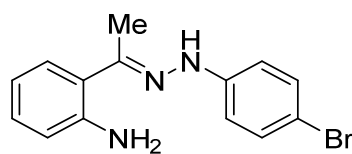

**(*E*)-2-(1-(2-(4-Bromophenyl)hydrazono)ethyl)aniline (1c).**

The product was obtained as brown needles (139.9 mg, 92%): mp 248–252 °C; <sup>1</sup>H NMR (400 MHz, DMSO-*d*<sub>6</sub>)  $\delta$  9.63 (br s, 1H), 7.61–7.59 (m, 1H), 7.49–7.47 (m, 1H), 7.37–7.33 (m, 5H), 7.29–7.27 (m, 3H), 2.31 (s, 3H); <sup>13</sup>C NMR (100 MHz, DMSO-*d*<sub>6</sub>)  $\delta$  144.9, 141.5, 131.4, 128.9, 128.3, 126.9, 123.8, 115.2, 110.2, 15.8; HRMS (ESI-TOF)  $[M+H]^+$  Calcd for  $[C_{14}H_{14}BrN_3]$  304.0449, found 304.0448.

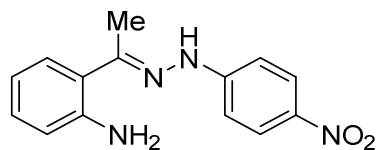

**(*E*)-2-(1-(2-(4-Nitrophenyl)hydrazono)ethyl)aniline (1d).**

The product was obtained as a red needles (120.3 mg, 89%): mp 254–259 °C; <sup>1</sup>H NMR (400 MHz, DMSO-*d*<sub>6</sub>)  $\delta$  10.12 (br s, 1H), 8.13 (d, *J* = 9.2 Hz, 2H), 7.37 (d, *J* = 8.4 Hz, 1H), 7.18 (d, *J* = 9.2 Hz, 2H), 7.04 (t, *J* = 7.6 Hz, 1H), 6.76 (d, *J* = 8.4 Hz, 1H), 6.58 (t, *J* = 7.6 Hz, 1H), 6.53 (br s, 2H), 2.35 (s, 3H); <sup>13</sup>C NMR (100 MHz, DMSO-*d*<sub>6</sub>)  $\delta$  151.0, 150.9, 146.8, 138.3, 129.1, 128.8, 126.1, 119.3, 116.0, 115.3, 111.4, 15.3; HRMS (ESI-TOF)  $[M+H]^+$  Calcd for  $[C_{14}H_{14}N_4O_2]$  271.1195, found 271.1172.

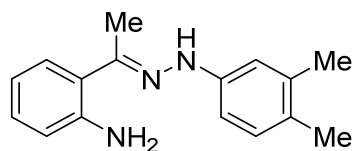

**(E)-2-(1-(2-(3,4-Dimethylphenyl)hydrazono)ethyl)aniline (1e).**

The product was obtained as a brown needles (121.6 mg, 96%): mp 233–237 °C;  $^1\text{H}$  NMR (400 MHz, DMSO- $d_6$ )  $\delta$  8.99 (br s, 1H), 7.30 (d,  $J$  = 7.6 Hz, 1H), 6.98–6.95 (m, 2H), 6.91 (s, 1H), 6.82 (d,  $J$  = 8.4 Hz, 1H), 6.71–6.68 (m, 3H), 6.54 (t,  $J$  = 7.2 Hz, 1H), 2.26 (s, 3H), 2.16 (s, 3H), 2.11 (s, 3H);  $^{13}\text{C}$  NMR (100 MHz, DMSO- $d_6$ )  $\delta$  146.4, 145.0, 144.2, 136.4, 130.0, 128.0, 127.8, 126.1, 120.0, 115.7, 115.1, 113.9, 109.9, 19.9, 18.6, 14.5; HRMS (ESI-TOF)  $[\text{M}+\text{H}]^+$  Calcd for  $[\text{C}_{16}\text{H}_{19}\text{N}_3]$  254.1657, found 254.1689.

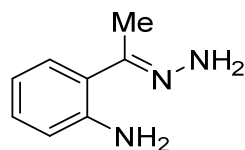

**(E)-2-(1-Hydrazonoethyl)aniline (1f).**

The product was obtained as a yellow solid (66.3 mg, 89%): mp 154–152 °C;  $^1\text{H}$  NMR (400 MHz,  $\text{CDCl}_3$ )  $\delta$  7.52–7.50 (m, 1H), 7.16–7.12 (m, 1H), 6.71–6.68 (m, 2H), 6.23 (br s, 2H), 2.39 (s, 3H), 2.02 (s, 2H);  $^{13}\text{C}$  NMR (100 MHz,  $\text{CDCl}_3$ )  $\delta$  171.1, 161.9, 147.7, 130.4, 129.5, 116.7, 116.3, 21.0; HRMS (ESI-TOF)  $[\text{M}+\text{H}]^+$  Calcd for  $[\text{C}_8\text{H}_{11}\text{N}_3]$  150.1031, found 150.1040.

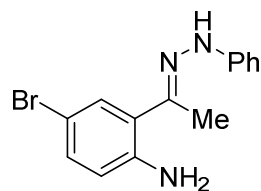

**(E)-4-Bromo-2-(1-(2-phenylhydrazono)ethyl)aniline (1g).**

The product was obtained as red needles (136.9 mg, 90%): mp 174–178 °C;  $^1\text{H}$  NMR (400 MHz, DMSO- $d_6$ )  $\delta$  9.28 (br s, 1H), 7.42 (s, 1H), 7.24–7.20 (m, 3H), 7.13–7.08 (m, 4H), 6.78–6.69 (m, 2H), 2.27 (s, 3H);  $^{13}\text{C}$  NMR (100 MHz, DMSO- $d_6$ )  $\delta$  145.8, 145.2, 144.1, 130.4, 130.0, 129.1, 122.2, 119.1, 118.0, 112.5, 106.2, 14.6; HRMS (ESI-TOF)  $[\text{M}+\text{H}]^+$  Calcd for  $[\text{C}_{14}\text{H}_{14}\text{BrN}_3]$  304.0449, found 304.0448.

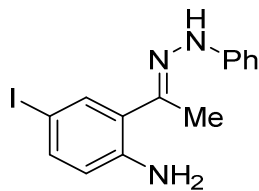

**(E)-4-Iodo-2-(1-(2-phenylhydrazono)ethyl)aniline (1h).** The product was

obtained as brown solid (149.1 mg, 85%): mp 188–192 °C;  $^1\text{H}$  NMR (400 MHz,  $\text{CDCl}_3$ )  $\delta$  7.587–7.583 (m, 1H), 7.31–7.25 (m, 4H), 7.02 (d,  $J$  = 8.3 Hz, 2H), 6.89 (t,  $J$  = 6.8 Hz, 1H), 6.50 (d,  $J$  = 8.3 Hz, 1H), 3.65 (br s, 2H), 2.26 (s, 3H);  $^{13}\text{C}$  NMR (100 MHz,  $\text{CDCl}_3$ )  $\delta$  145.1, 144.7, 143.6, 136.8, 136.4, 129.4, 123.4, 120.5, 118.7, 113.0, 99.9, 13.3; HRMS (ESI-TOF)  $[\text{M}+\text{H}]^+$  Calcd for  $[\text{C}_{14}\text{H}_{14}\text{IN}_3]$  352.0311, found 352.0324.

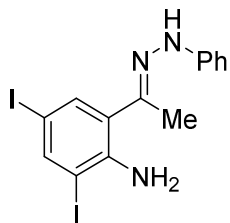

**(E)-2,4-Diiodo-6-(1-(2-phenylhydrazono)ethyl)aniline (1i).** The product was

obtained as brown needles (217.1 mg, 91%): mp 168–172 °C;  $^1\text{H}$  NMR (400 MHz,  $\text{CDCl}_3+\text{DMSO}-d_6$  (50:50))  $\delta$  8.64 (br s, 1H), 7.70–7.69 (m, 1H), 7.53–7.48 (m, 1H), 7.20–7.14 (m, 3H), 7.04–7.02 (m, 3H), 6.75 (t,  $J$  = 7.6 Hz, 1H), 2.22 (s, 3H);  $^{13}\text{C}$  NMR (100 MHz,  $\text{CDCl}_3+\text{DMSO}-d_6$  (50:50))  $\delta$  144.4, 144.0, 143.5, 141.5, 135.6, 128.3, 122.6, 119.0, 112.0, 86.3, 75.5, 13.5; HRMS (ESI-TOF)  $[\text{M}+\text{H}]^+$  Calcd for  $[\text{C}_{14}\text{H}_{13}\text{I}_2\text{N}_3]$  477.9277, found 477.9277.

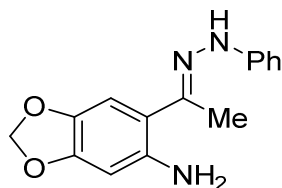

**(E)-6-(1-(2-Phenylhydrazono)ethyl)benzo[d][1,3]dioxol-5-amine (1j).**

The product was obtained as brown needles (114.5 mg, 85%): mp 188–192 °C;  $^1\text{H}$  NMR (400 MHz,  $\text{DMSO}-d_6$ )  $\delta$  9.01 (s, 1H), 7.20 (t,  $J$  = 7.6 Hz, 2H), 7.05 (d,  $J$  = 7.6 Hz, 2H), 6.94–6.89 (m, 3H), 6.73 (t,  $J$  = 6.8 Hz, 1H), 6.39 (s, 1H), 5.87 (s, 2H), 2.23 (s, 3H);  $^{13}\text{C}$  NMR (100 MHz,  $\text{DMSO}-d_6$ )  $\delta$  147.1, 146.2, 145.8, 138.5, 129.0, 128.1, 125.5, 118.6, 112.9, 112.3, 107.4, 100.4, 97.2, 15.0; HRMS (ESI-TOF)  $[\text{M}+\text{H}]^+$  Calcd for  $[\text{C}_{15}\text{H}_{15}\text{N}_3\text{O}_2]$  270.1243, found 270.1241.

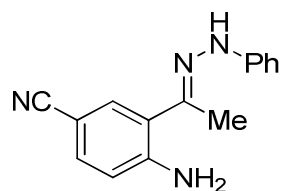

**(*E*)-4-Amino-3-(1-(2-phenylhydrazono)ethyl)benzonitrile (1k).** The

product was obtained as pale white solid (112.5 mg, 90%): mp 185–189 °C;  $^1\text{H}$  NMR (400 MHz, DMSO- $d_6$ )  $\delta$  9.23 (s, 1H), 7.69–7.68 (m, 1H), 7.57 (br s, 2H), 7.48 (dd,  $J$  = 10.9 and 2.2 Hz, 2H), 7.03–7.01 (m, 2H), 6.77–6.71 (m, 3H), 2.26 (s, 3H);  $^{13}\text{C}$  NMR (100 MHz, DMSO- $d_6$ )  $\delta$  153.6, 145.6, 138.2, 135.9, 129.2, 119.7, 119.3, 117.7, 116.5, 115.9, 112.5, 95.4, 14.3; HRMS (ESI-TOF)  $[\text{M}+\text{H}]^+$  Calcd for  $[\text{C}_{15}\text{H}_{14}\text{N}_4]$  251.1297, found 251.1287.

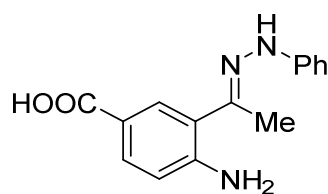

**(*E*)-4-Amino-3-(1-(2-phenylhydrazono)ethyl)benzoic acid (1l).** The

product was obtained as brown solid (73.9 mg, 55%): mp 198–200 °C;  $^1\text{H}$  NMR (400 MHz, DMSO- $d_6$ )  $\delta$  12.1 (s, 1H), 9.27 (s, 1H), 7.95 (s, 1H), 7.56 (d,  $J$  = 8.4 Hz, 1H), 7.45 (br s, 2H), 7.19 (t,  $J$  = 15.2 Hz, 2H), 7.06 (d,  $J$  = 8.0 Hz, 2H), 6.74 (d,  $J$  = 8.4 Hz, 2H), 2.31 (s, 3H);  $^{13}\text{C}$  NMR (100 MHz, DMSO- $d_6$ )  $\delta$  168.0, 151.1, 146.4, 145.6, 137.8, 130.1, 129.6, 119.6, 119.1, 117.2, 115.6, 112.9, 15.0; HRMS (ESI-TOF)  $[\text{M}+\text{H}]^+$  Calcd for  $[\text{C}_{15}\text{H}_{15}\text{N}_3\text{O}_2]$  270.1243, found 270.1263.

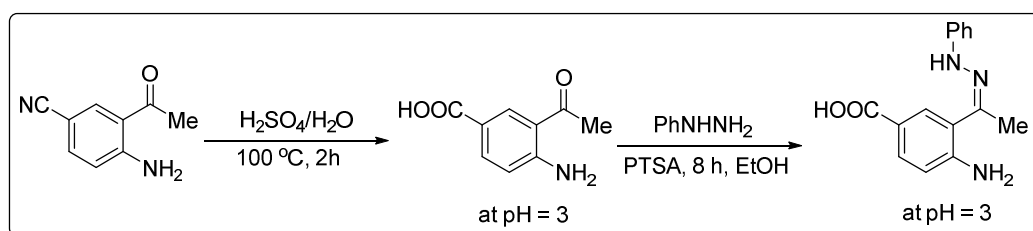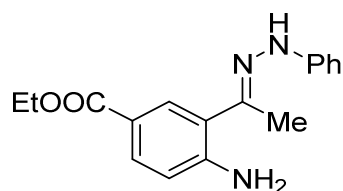

**Ethyl (*E*)-4-amino-3-(1-(2-phenylhydrazono)ethyl)benzoate (1m).**

The product was obtained as yellow solid (118.8 mg, 80%): mp 182–184 °C;  $^1\text{H}$  NMR (400 MHz, DMSO- $d_6$ )  $\delta$  9.26 (s, 1H), 7.98 (s, 1H), 7.60 (dd,  $J$  = 10.9 and 6.8 Hz, 1H), 7.53 (br s, 2H), 7.23

(t,  $J = 15.6$  Hz, 2H), 7.08 (d,  $J = 7.6$  Hz, 2H), 6.79–6.76 (m, 2H), 3.76 (s, 3H), 2.34 (s, 3H);  $^{13}\text{C}$  NMR (100 MHz, DMSO- $d_6$ )  $\delta$ 166.9, 151.4, 146.4, 145.4, 130.6, 129.9, 129.7, 119.6, 119.2, 116.1, 115.7, 113.0, 51.9, 14.9; HRMS (ESI-TOF)  $[\text{M}+\text{H}]^+$  Calcd for  $[\text{C}_{16}\text{H}_{17}\text{N}_3\text{O}_2]$  284.1399, found 284.1399.

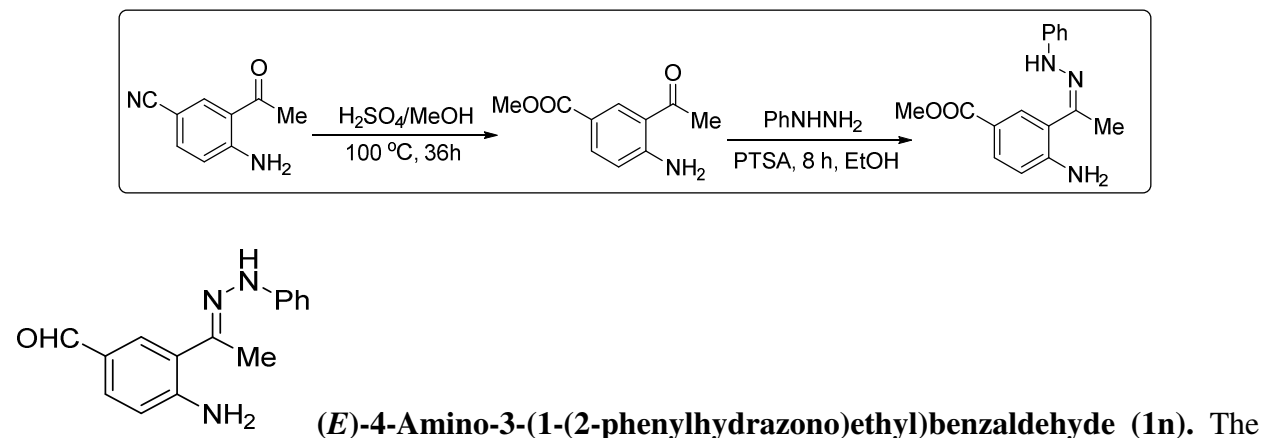

The product was obtained as yellow solid (9.108 g, 60%): (E)-4-amino-3-(1-(2-phenylhydrazono)ethyl)benzonitrile (**1k**) (11.2 g, 60 mmol) was charged into a 500 mL three-necked, round-bottomed flask and underwent three cycles of vacuum/filling with  $\text{N}_2$ . Dry THF (100 mL) was then added and a solution of diisobutylaluminum hydride (100 mL, 1.5 min toluene) was added at 23–30 °C over 20 min. Upon complete addition, the resulting solution was stirred for an additional 30 min. After the reaction was complete, the mixture was cooled to –10 °C and methanol (18 mL) was carefully added. Then the mixture was stirred for an additional 2 h at rt and an aqueous saturated Rochelle salt solution was added dropwise. After the quench was complete, the mixture was stirred at 45–50 °C for 10 min. tert-Butyl methyl ether (150 mL) was added and stirred for 10 min. Organic layers were separated, and more tert-butyl methyl ether was added for extraction. The combined organic phases were dried over  $\text{MgSO}_4$  and concentrated under vacuum. The residue was used directly in the next step.  $^1\text{H}$  NMR (400 MHz,  $\text{CDCl}_3$ )  $\delta$  9.74 (s, 1H), 8.23 (d,  $J = 1.6$  Hz, 1H), 7.92 (d,  $J = 1.6$  Hz, 1H), 7.76 (dd,  $J = 8.7$  and 1.8 Hz, 1H), 7.58 (dd,  $J = 8.4$  and 1.6 Hz, 1H), 7.33 (br s, 1H), 7.28 (t,  $J = 8.2$  Hz, 1H), 7.02 (d,  $J = 7.7$  Hz, 2H), 6.90 (t,  $J = 7.4$  Hz, 1H), 6.73–6.67 (m, 2H), 2.64 (s, 3H);  $^{13}\text{C}$  NMR (100 MHz,  $\text{CDCl}_3$ )  $\delta$ 190.6, 152.0, 144.7, 144.5, 136.8, 134.5, 130.9, 129.3, 126.1, 119.7, 117.5, 116.2, 113.1, 13.2; HRMS (ESI-TOF)  $[\text{M}+\text{H}]^+$  Calcd for  $[\text{C}_{15}\text{H}_{15}\text{N}_3\text{O}]$  254.1293, found 254.1305.

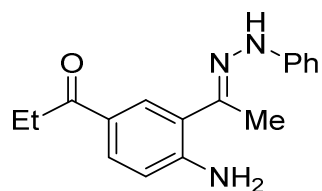

**(*E*)-1-(4-Amino-3-(1-(2-phenylhydrazono)ethyl)phenyl)propan-1-**

**one (1o).** The product was obtained as brown solid (1.910 g, 68%): A 250 mL round-bottom Schlenk bottle was charged with *E*-4-amino-3-(1-(2-phenylhydrazono)ethyl)benzonitrile (**1k**) (1.18 g, 10.0 mmol) and 30 mL THF. The bottle was evacuated and backfilled with N<sub>2</sub> for three times and placed in an ice bath. Grignard reagent (30 mmol, purchased from Aldrich or freshly prepared) was added dropwise to the solution at 0 °C. The resulting mixture was allowed to warm to room temperature and was stirred for 6 h. Upon the completion of the reaction, 1 M HCl was added dropwise to the mixture with stirring, followed by addition of solid NaOH to make the solution basic. The organic layer was separated and the aqueous layer was extracted with Et<sub>2</sub>O (3 × 30 mL). The combined organic solutions were washed with brine, dried over Na<sub>2</sub>SO<sub>4</sub> and concentrated. The crude residue was purified by flash column chromatography to yield the product. <sup>1</sup>H NMR (400 MHz, CDCl<sub>3</sub>) δ 7.98 (s, 1H), 7.83 (d, *J* = 9.6 Hz, 1H), 7.57 (s, 1H), 7.46 (br s, 1H), 7.38 (d, *J* = 8.8 Hz, 1H), 7.28–7.24 (m, 1H), 7.00 (d, *J* = 7.6 Hz, 1H), 6.88 (t, *J* = 7.6 Hz, 1H), 6.66–6.60 (m, 2H), 2.89 (q, *J* = 7.2 Hz, 2H), 2.59 (s, 3H), 1.91 (t, *J* = 7.2 Hz, 3H); <sup>13</sup>C NMR (100 MHz, CDCl<sub>3</sub>) δ 199.8, 153.1, 149.9, 143.3, 137.7, 134.0, 132.7, 129.6, 120.8, 118.1, 116.5, 112.8, 31.4, 27.9, 8.7; HRMS (ESI-TOF) [M+H]<sup>+</sup> Calcd for [C<sub>17</sub>H<sub>19</sub>N<sub>3</sub>O] 282.1606, found 282.1609.

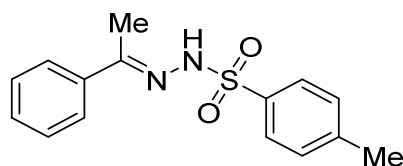

**(*E*)-4-Methyl-*N'*-(1-**

**phenylethylidene)benzenesulfonohydrazide (1p).** The product was obtained as a pale light yellow (122.4 mg, 85%): mp 215–219 °C; <sup>1</sup>H NMR (400 MHz, CDCl<sub>3</sub>) δ 7.91 (s, 1H), 7.92 (d, *J* = 7.6 Hz, 2H), 7.64–7.61 (m, 2H), 7.33–7.29 (m, 5H), 2.39 (s, 3H), 2.14 (s, 3H); <sup>13</sup>C NMR (100 MHz, CDCl<sub>3</sub>) δ 152.7, 144.2, 137.4, 135.5, 129.7, 128.4, 128.2, 126.4, 21.7, 13.5; HRMS (ESI-TOF) [M+H]<sup>+</sup> Calcd for [C<sub>15</sub>H<sub>16</sub>N<sub>2</sub>O<sub>2</sub>S] 289.1011, found 289.1029.

**General Procedure for the Synthesis of hydrazone(1a-D<sub>2</sub>):** In an oven dried round bottom flask compound **A** is kept for 36 h in D<sub>2</sub>O in EtOAc at room temperature for the synthesis of **A-**

**D<sub>2</sub>** then 2-aminoacetophenones **A-D<sub>2</sub>** (0.5 mmol), PTSA (5.0 mol %) and corresponding hydrazine **B** (0.5 mmol) refluxed in 2.0 mL of EtOH for 3-12 h. Progression of the reaction was monitored by TLC, while noticing complete consumption of starting substrate, reaction was brought to room temperature. The reaction mixture was dried under reduced pressure. The crude material was purified by hexane washing to obtained hydrazones **1a-D<sub>2</sub>**.

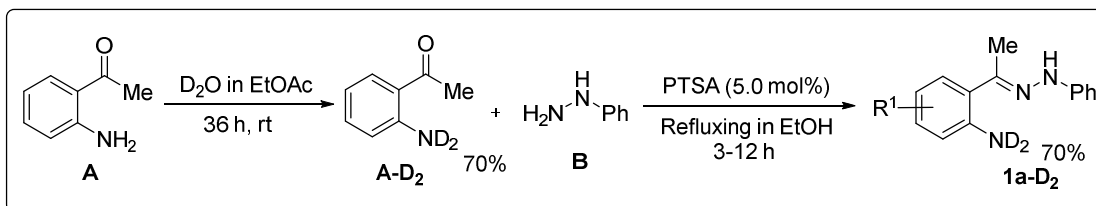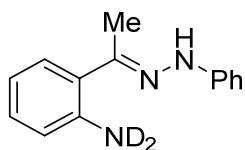

**(E)-2-(1-(2-Phenylhydrazono) ethyl)aniline-*d*<sub>2</sub> (1a-D<sub>2</sub>)**. The product was

obtained as a white needles (111.2 mg, 98%): mp 215–217 °C; <sup>1</sup>H NMR (400 MHz, DMSO-*d*<sub>6</sub>)  $\delta$  9.23 (br s, 1H), 7.48 (dd, *J* = 6.4 and 2.2 Hz, 1H), 7.30 (dd, *J* = 8.4 and 2.7 Hz, 1H), 7.18 (t, *J* = 8.2 Hz, 2H), 7.02 (d, *J* = 7.3 Hz, 2H), 6.80 (s, 1H), 6.77–6.74 (m, 2H), 2.26 (s, 3H); <sup>13</sup>C NMR (100 MHz, DMSO-*d*<sub>6</sub>)  $\delta$  150.3, 145.6, 144.2, 132.5, 131.4, 129.2, 120.6, 119.7, 116.5, 115.9, 112.5, 14.3; HRMS (ESI-TOF) [M+H]<sup>+</sup> Calcd for [C<sub>14</sub>H<sub>13</sub>D<sub>2</sub>N<sub>3</sub>] 228.1470, found 228.1442.

### General Procedure for the Synthesis of Functionalized Quinolines (**3a-o**), (**4a-j**) and (**3a-D<sub>1</sub>**):

In an oven-dried round bottom flask, hydrazones **1a-k** (0.5 mmol), alkyne **2a-l** (0.6 mmol) and Rhodium catalyst (2.5 mol %) in 2.0 mL of acetonitrile were added under inert atmosphere. The resulting reaction mixture was heated at 80 °C for 24 h. Progression of the reaction was monitored by TLC analysis; after complete consumption of starting material, the reaction was cooled to room temperature. The reaction mixture was diluted with ethyl acetate (10 mL) and water (15 mL). The layers were separated, and the organic layer was washed with aqueous saturated brine solution and dried over Na<sub>2</sub>SO<sub>4</sub>. Organic layer was concentrated under reduced pressure. The crude material so obtained was purified by column chromatography on silica gel (100–200) (hexane:ethyl acetate; 90/10). The structure and purity of known starting materials were confirmed by comparison of their physical and spectral data (<sup>1</sup>H NMR, <sup>13</sup>C NMR, and HRMS).



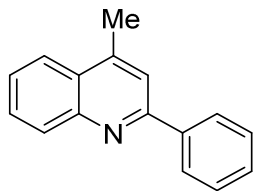

**4-Methyl-2-phenylquinoline (3a).**

The product was crystallised in DCM/hexane and obtained as light yellow crystals (87.6 mg, 80% yield), mp 90–92 °C,  $^1\text{H}$  NMR (400 MHz,  $\text{CDCl}_3$ )  $\delta$  8.11 (d,  $J$  = 9.1 Hz, 1H), 8.07 (d,  $J$  = 8.3 Hz, 2H), 7.92 (d,  $J$  = 8.3 Hz, 1H), 7.64 (t,  $J$  = 8.3 Hz, 2H), 7.49–7.43 (m, 3H), 7.40–7.36 (m, 1H), 2.70 (s, 3H).  $^{13}\text{C}$  NMR (100 MHz,  $\text{CDCl}_3$ )  $\delta$  157.1, 148.0, 144.9, 139.7, 130.2, 129.4, 129.2, 128.8, 127.5, 127.2, 126.0, 123.6, 119.8, 22.6. HRMS (ESI-TOF) calcd for  $[\text{C}_{16}\text{H}_{13}\text{N}]$  requires  $[\text{M}+\text{H}]^+$  220.1126 found 220.1120.

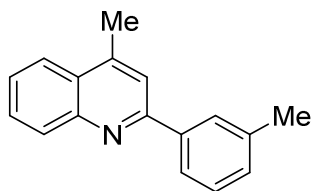

**4-Methyl-2-(*m*-tolyl)quinoline (3b).**

The product was obtained as a yellow semi-solid (83.8 mg, 72% yield), mp 100–102 °C;  $^1\text{H}$  NMR (400 MHz,  $\text{CDCl}_3$ )  $\delta$  8.29 (s, 1H), 8.02–8.00 (m, 2H), 7.92 (d,  $J$  = 7.6 Hz, 1H), 7.75–7.72 (m, 2H), 7.59–7.54 (m, 1H), 7.42 (t,  $J$  = 7.6 Hz, 1H), 7.28 (d,  $J$  = 7.6 Hz, 1H), 2.70 (s, 3H), 2.48 (s, 3H);  $^{13}\text{C}$  NMR (100 MHz,  $\text{CDCl}_3$ )  $\delta$  157.1, 144.9, 144.3, 139.5, 138.5, 130.1, 129.5, 128.7, 128.3, 127.2, 126.1, 124.7, 123.6, 122.2, 120.0, 21.6, 19.1. HRMS (ESI-TOF) ( $\text{M}+\text{H})^+$  Calcd for  $[\text{C}_{17}\text{H}_{15}\text{N}]$  234.1283, found 234.1283.

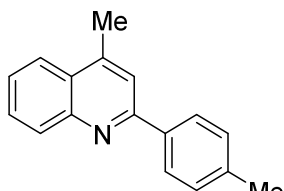

**4-Methyl-2-(*p*-tolyl)quinoline (3c).**

The product was obtained as a yellow solid (95.5 mg, 82% yield), mp 100–102 °C;  $^1\text{H}$  NMR (400 MHz,  $\text{CDCl}_3$ )  $\delta$  8.09 (d,  $J$  = 8.3 Hz, 1H), 7.98 (d,  $J$  = 7.6 Hz, 2H), 7.91 (d,  $J$  = 8.3 Hz, 1H), 7.65–7.61 (m, 2H), 7.45 (t,  $J$  = 6.8 Hz, 1H), 7.25 (d,  $J$  = 7.6 Hz, 2H), 2.68 (s, 3H), 2.35 (s, 3H);  $^{13}\text{C}$  NMR (100 MHz,  $\text{CDCl}_3$ )  $\delta$  157.0, 148.0, 144.7, 139.2, 136.9, 130.1, 129.5, 129.2, 127.4, 127.1, 125.8, 123.6, 119.6, 21.3, 19.0. HRMS (ESI-TOF) ( $\text{M}+\text{H})^+$  Calcd for  $[\text{C}_{17}\text{H}_{15}\text{N}]$  234.1283, found 234.1258.

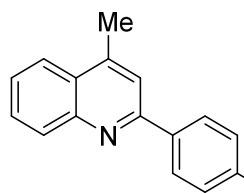

**Et 2-(4-Ethylphenyl)-4-methylquinoline (3e).** The product was crystallised in DCM/ hexane and obtained as light yellow crystals (92.6 mg, 75% yield), mp 104–106 °C;  $^1\text{H}$  NMR (400 MHz,  $\text{CDCl}_3$ )  $\delta$  8.15 (d,  $J$  = 8.3 Hz, 1H), 8.06 (d,  $J$  = 7.6 Hz, 2H), 7.97 (d,  $J$  = 8.3 Hz, 1H), 7.71–7.67 (m, 2H), 7.51 (t,  $J$  = 8.3 Hz, 1H), 7.34 (d,  $J$  = 8.3 Hz, 2H), 2.74–2.69 (m, 5H), 1.28 (t,  $J$  = 7.6 Hz, 3H).  $^{13}\text{C}$  NMR (100 MHz,  $\text{CDCl}_3$ )  $\delta$  157.1, 148.1, 145.5, 144.6, 137.2, 130.1, 129.2, 128.3, 127.5, 127.1, 125.8, 123.5, 119.6, 28.7, 19.0, 15.5. HRMS (ESI-TOF) calcd for  $[\text{C}_{18}\text{H}_{17}\text{N}]$  requires  $[\text{M}+\text{H}]^+$  248.1439 found 248.1434.

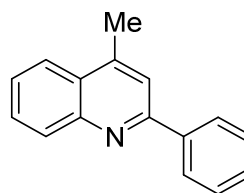

**$n\text{Bu}$  2-(4-Butylphenyl)-4-methylquinoline (3f).** The product was obtained as a yellow solid (103.1 mg, 75% yield), mp 120–122 °C;  $^1\text{H}$  NMR (400 MHz,  $\text{CDCl}_3$ )  $\delta$  7.98 (d,  $J$  = 8.3 Hz, 1H), 7.81–7.79 (m, 2H), 7.65–7.61 (m, 1H), 7.45 (t,  $J$  = 7.6 Hz, 1H), 7.25 (d,  $J$  = 8.3 Hz, 1H), 7.20–7.17 (m, 3H), 2.59 (t,  $J$  = 8.6 Hz, 2H), 2.50 (s, 3H), 1.58–1.50 (m, 2H), 1.32–1.27 (m, 2H), 0.88–0.83 (m, 3H);  $^{13}\text{C}$  NMR (100 MHz,  $\text{CDCl}_3$ )  $\delta$  157.1, 148.8, 147.0, 144.3, 134.8, 129.3, 128.9, 128.6, 128.4, 127.4, 125.8, 123.6, 119.7, 35.7, 33.2, 22.3, 19.0, 13.9. HRMS (ESI-TOF)  $(\text{M}+\text{H})^+$  Calcd for  $[\text{C}_{20}\text{H}_{21}\text{N}]$  276.1752, found: 276.1745.

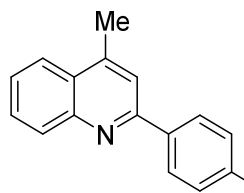

**$t\text{Bu}$  2-(4-(*tert*-Butyl)phenyl)-4-methylquinoline (3g).** The product was obtained as a yellow solid (107.2 mg, 78% yield), mp 120–122 °C;  $^1\text{H}$  NMR (400 MHz,  $\text{CDCl}_3$ )  $\delta$  8.18 (d,  $J$  = 8.3 Hz, 1H), 8.07 (d,  $J$  = 8.3 Hz, 2H), 7.98 (d,  $J$  = 8.3 Hz, 1H), 7.72–7.68 (m, 2H), 7.55–7.52 (m, 2H), 7.50–7.46 (m, 1H), 2.75 (s, 3H), 1.38 (s, 9H);  $^{13}\text{C}$  NMR (100 MHz,  $\text{CDCl}_3$ )  $\delta$  157.1, 152.4, 148.1, 144.7, 137.0, 130.1, 129.2, 128.3, 127.2, 125.8, 125.7, 123.6, 119.7, 34.7, 31.3, 19.0. HRMS (ESI-TOF)  $(\text{M}+\text{H})^+$  Calcd for  $[\text{C}_{20}\text{H}_{21}\text{N}]$  276.1752, found: 276.1745.

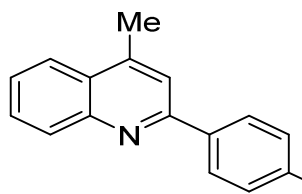

**2-(4-Methoxyphenyl)-4-methylquinoline (3h).** The product was crystallised in DCM/ hexane and obtained as light yellow crystals (104.5mg, 84% yield), mp 110–112 °C,  $^1\text{H}$  NMR (400 MHz,  $\text{CDCl}_3$ )  $\delta$  8.14– 8.11 (m, 2H), 7.97 (d,  $J$  = 8.3 Hz, 1H), 7.93 (d,  $J$  = 8.3 Hz, 1H), 7.70 (d,  $J$  = 7.6 Hz, 1H), 7.67 (s, 1H), 7.51 (t,  $J$  = 8.3 Hz, 1H), 7.03 (d,  $J$  = 9.1 Hz, 2H), 3.88 (s, 3H), 2.75 (s, 3H).  $^{13}\text{C}$  NMR (100 MHz,  $\text{CDCl}_3$ )  $\delta$  160.7, 156.6, 148.1, 144.6, 132.3, 130.6, 130.0, 129.2, 128.8, 125.6, 123.6, 119.3, 114.1, 55.4, 19.0. HRMS (ESI-TOF) calcd for  $[\text{C}_{17}\text{H}_{15}\text{NO}]$  requires  $[\text{M}+\text{H}]^+$  250.1232 found 250.1231.

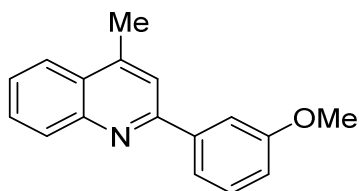

**2-(3-Methoxyphenyl)-4-methylquinoline (3i).** The product was crystallised in DCM/ hexane and obtained as light yellow crystals (97.1mg, 78% yield), mp 112–112 °C,  $^1\text{H}$  NMR (400 MHz,  $\text{CDCl}_3$ )  $\delta$  8.17 (d,  $J$  = 8.3 Hz, 1H), 7.99 (d,  $J$  = 7.3 Hz, 1H), 7.74 (s, 1H), 7.71– 7.67 (m, 3H), 7.54 (t,  $J$  = 7.6 Hz, 1H), 7.41 (t,  $J$  = 8.3 Hz, 1H), 7.06 (dd,  $J$  = 8.3 and 2.2 Hz, 1H), 3.92 (s, 3H), 2.76 (s, 3H).  $^{13}\text{C}$  NMR (100 MHz,  $\text{CDCl}_3$ )  $\delta$  160.0, 156.9, 148.0, 144.8, 141.3, 130.2, 129.7, 129.3, 127.3, 126.0, 123.6, 120.0, 119.9, 115.3, 112.6, 55.4, 19.0. HRMS (ESI-TOF) calcd for  $[\text{C}_{17}\text{H}_{15}\text{NO}]$  requires  $[\text{M}+\text{H}]^+$  250.1232 found 250.1228.

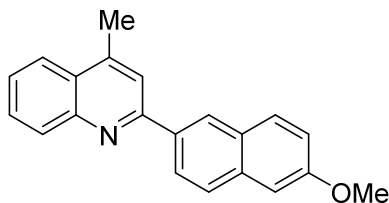

**2-(6-Methoxynaphthalen-2-yl)-4-methylquinoline (3j).** The product was obtained as a yellow solid (104.6 mg, 70% yield), mp 120–122 °C;  $^1\text{H}$  NMR (400 MHz,  $\text{CDCl}_3$ )  $\delta$  8.55 (s, 1H), 8.32 (dd,  $J$  = 8.3 and 2.2 Hz, 1H), 8.22 (d,  $J$  = 8.3 Hz, 1H), 8.02 (d,  $J$  = 9.1 Hz, 1H), 7.90–7.86 (m, 3H), 7.73 (t,  $J$  = 8.3 Hz, 1H), 7.57–7.53 (m, 1H), 7.21–7.18 (m, 2H), 3.96 (s, 3H), 2.80 (s, 3H);  $^{13}\text{C}$  NMR (100 MHz,  $\text{CDCl}_3$ ):  $\delta$  157.0, 147.5, 145.0, 130.3, 130.1, 129.4, 127.3, 126.9, 126.0, 125.6, 124.1, 123.6, 119.8, 119.2, 105.6, 55.3, 19.1. HRMS (ESI-TOF)  $(\text{M}+\text{H})^+$  Calcd for  $[\text{C}_{21}\text{H}_{17}\text{NO}]$  300.1388, found 300.1387.

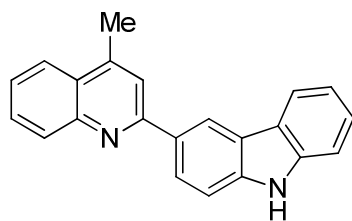

**3-(4-Methylquinolin-2-yl)-9H-carbazole (3k).** The product was obtained as yellow solid (110.9 mg, 72%): mp 132–134 °C:  $^1\text{H}$  NMR (400 MHz,  $\text{CDCl}_3$ )  $\delta$  8.84 (s, 1H), 8.39 (s, 1H), 8.25–8.20 (m, 2H), 8.15 (d,  $J = 7.8$  Hz, 1H), 7.99 (d,  $J = 9.3$  Hz, 1H), 7.81 (s, 1H), 7.73–7.69 (m, 1H), 7.54–7.50 (m, 1H), 7.44–7.36 (m, 3H), 7.26–7.22 (m, 1H), 2.77 (s, 3H);  $^{13}\text{C}$  NMR (100 MHz,  $\text{CDCl}_3$ )  $\delta$  158.0, 148.1, 145.0, 140.5, 140.1, 131.1, 129.7, 129.5, 127.1, 126.2, 125.8, 125.8, 123.9, 123.8, 123.7, 120.7, 120.2, 119.9, 119.8, 111.0, 110.9, 19.2. HRMS (ESI-TOF) Calcd for  $[\text{C}_{22}\text{H}_{17}\text{N}_2]$  requires  $[\text{M}+\text{H}]^+ 309.1386$ , found 309.1416.

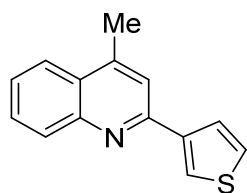

**4-Methyl-2-(thiophen-3-yl)quinoline (3l).** The product was crystallised in DCM/ hexane and obtained as light yellow crystals, (84.3 mg, 75% yield), mp 100–102 °C,  $^1\text{H}$  NMR (400 MHz,  $\text{CDCl}_3$ )  $\delta$  8.10 (d,  $J = 8.3$  Hz, 1H), 8.01 (s, 1H), 7.89 (d,  $J = 8.3$  Hz, 1H), 7.80–7.79 (m, 1H), 7.63 (t,  $J = 6.8$  Hz, 1H), 7.55 (s, 1H), 7.45 (t,  $J = 8.3$  Hz, 1H), 7.37–7.35 (m, 1H), 2.67 (s, 3H).  $^{13}\text{C}$  NMR (100 MHz,  $\text{CDCl}_3$ )  $\delta$  152.0, 145.30, 145.25, 140.2, 129.6, 127.2, 126.8, 126.4, 126.0, 125.9, 125.0, 123.6, 119.8, 19.0. HRMS (ESI-TOF) calcd for  $[\text{C}_{14}\text{H}_{11}\text{NS}]$  requires  $[\text{M}+\text{H}]^+ 226.0690$  found 226.0683.

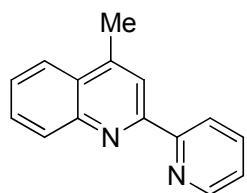

**4-Methyl-2-(pyridin-2-yl)quinoline (3m).** The product was obtained as yellow solid (50.6 mg, 46%): mp 138–140 °C:  $^1\text{H}$  NMR (400 MHz,  $\text{CDCl}_3$ )  $\delta$  8.91 (s, 1H), 8.76 (d,  $J = 4.8$  Hz, 1H), 8.11 (dd,  $J = 14.1, 8.5$  Hz, 2H), 7.80 (t,  $J = 7.7$  Hz, 1H), 7.72–7.68 (m, 1H), 7.58 (t,  $J = 8.2$  Hz, 1H), 7.46 (d,  $J = 7.8$  Hz, 1H), 7.31 (t,  $J = 6.2$  Hz, 1H), 2.70 (s, 3H);  $^{13}\text{C}$  NMR (100 MHz,  $\text{CDCl}_3$ )  $\delta$  157.2, 151.1, 149.8, 147.3, 141.9, 136.6, 133.1, 129.9, 129.4, 128.0, 126.9, 125.2, 124.4, 122.4, 15.5. HRMS (ESI-TOF) Calcd for  $[\text{C}_{15}\text{H}_{13}\text{N}_2]$  requires  $[\text{M}+\text{H}]^+ 221.1073$ , found 221.1094.

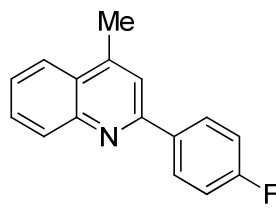

**2-(4-Fluorophenyl)-4-methylquinoline (3n).** The product was obtained as pale yellow solid (60.4 mg, 51%): mp 99–101 °C:  $^1\text{H}$  NMR (400 MHz,  $\text{CDCl}_3$ )  $\delta$  8.24 (d,  $J$  = 8.4 Hz, 1H), 8.15 (ddd,  $J$  = 12.0, 5.3, 3.1 Hz, 2H), 7.99 (dd,  $J$  = 8.3, 0.9 Hz, 1H), 7.74–7.70 (m, 1H), 7.65 (s, 1H), 7.57–7.53 (m, 1H), 7.22–7.16 (m, 2H), 2.75 (s, 3H);  $^{13}\text{C}$  NMR (100 MHz,  $\text{CDCl}_3$ )  $\delta$  163.9 (d,  $J$  = 249.5 Hz, 1C), 155.8, 147.5, 145.8, 135.4, 129.8 (d,  $J$  = 6.7 Hz, 1C), 129.7 (d,  $J$  = 8.7 Hz, 1C), 127.2, 126.4, 123.7, 119.6, 115.8 (d,  $J$  = 22.2 Hz, 1C), 19.2. HRMS (ESI-TOF) Calcd for  $[\text{C}_{16}\text{H}_{13}\text{FN}]$  requires  $[\text{M}+\text{H}]^+ 238.1027$ , found 238.1033.

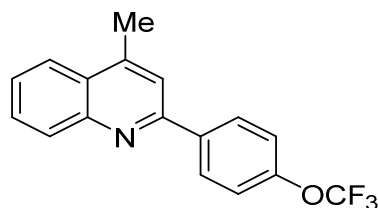

**4-Methyl-2-(4-(trifluoromethoxy)phenyl)quinoline (3o).** The product was obtained as a yellow solid (103.0 mg, 68% yield), mp 108–110 °C;  $^1\text{H}$  NMR (400 MHz,  $\text{CDCl}_3$ )  $\delta$  8.12–8.09 (m, 3H), 7.94 (d,  $J$  = 8.3 Hz, 1H), 7.68–7.64 (m, 1H), 7.61 (s, 1H), 7.52–7.47 (m, 1H), 7.29 (d,  $J$  = 8.3 Hz, 2H), 2.71 (s, 3H);  $^{13}\text{C}$  NMR (100 MHz,  $\text{CDCl}_3$ )  $\delta$  155.6, 150.0, 145.3, 138.3, 130.2, 129.6, 129.0, 128.7, 127.3, 126.3, 123.7, 121.1, 119.5, 19.1. HRMS (ESI-TOF)  $(\text{M}+\text{H})^+$  Calcd for  $[\text{C}_{17}\text{H}_{12}\text{F}_3\text{NO}]$  304.0949, found 304.0953.

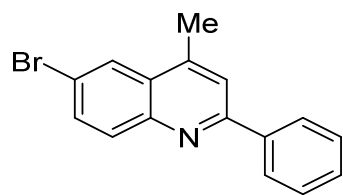

**6-Bromo-4-methyl-2-phenylquinoline (4a).** The product was crystallised in DCM/ hexane and obtained as light yellow crystals, (112.8 mg, 76% yield), mp 100–102 °C,  $^1\text{H}$  NMR (400 MHz,  $\text{CDCl}_3$ )  $\delta$  8.04–8.02 (m, 3H), 7.94 (d,  $J$  = 8.3 Hz, 1H), 7.68 (dd,  $J$  = 11.4 and 6.8 Hz, 1H), 7.62 (s, 1H), 7.43 (t,  $J$  = 6.8 Hz, 2H), 7.38 (d,  $J$  = 7.6 Hz, 1H), 2.62 (s, 3H).  $^{13}\text{C}$  NMR (100 MHz,  $\text{CDCl}_3$ )  $\delta$  157.4, 146.6, 144.1, 139.2, 132.7, 131.8, 129.5, 128.8, 128.5, 127.5, 126.1, 120.5, 120.0, 19.0. HRMS (ESI-TOF) Calcd for  $[\text{C}_{16}\text{H}_{12}\text{BrN}]$  requires  $[\text{M}+\text{H}]^+ 298.0231$ , found 298.0224.

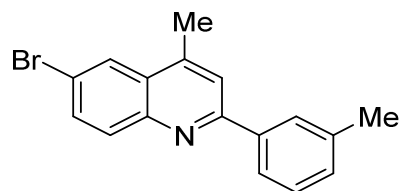

**6-Bromo-4-methyl-2-(*m*-tolyl)quinoline (4b).** The product was obtained as a yellow solid (121.1 mg, 78% yield), mp 110–112 °C;  $^1\text{H}$  NMR (400 MHz,  $\text{CDCl}_3$ )  $\delta$  8.14–8.13 (m, 1H), 8.04 (d,  $J$  = 9.1 Hz, 1H), 7.97 (s, 1H), 7.89 (d,  $J$  = 7.6 Hz, 1H), 7.77 (dd,  $J$  = 8.7 and 2.2 Hz, 1H), 7.72 (s, 1H), 7.41 (t,  $J$  = 7.6 Hz, 1H), 7.31–7.27 (m, 1H), 2.73 (s, 3H), 2.47 (s, 3H);  $^{13}\text{C}$  NMR (100 MHz,  $\text{CDCl}_3$ )  $\delta$  153.7, 146.5, 145.5, 140.0, 138.6, 132.7, 131.9, 130.4, 130.3, 128.7, 128.5, 128.2, 126.1, 124.6, 120.6, 21.6, 19.0. HRMS (ESI-TOF)  $(\text{M}+\text{H})^+$  Calcd for  $[\text{C}_{17}\text{H}_{14}\text{BrN}]$  312.0388, found 312.0391.

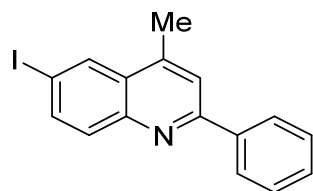

**6-Iodo-4-methyl-2-phenylquinoline (4c).** The product was crystallised in DCM/ hexane and obtained as light yellow crystals, (117.3 mg, 68% yield), mp 100–102 °C,  $^1\text{H}$  NMR (400 MHz,  $\text{CDCl}_3$ )  $\delta$  8.10 (d,  $J$  = 8.3 Hz, 1H), 8.06 (d,  $J$  = 7.6 Hz, 2H), 7.92 (d,  $J$  = 8.3 Hz, 1H), 7.63 (t,  $J$  = 8.3 Hz, 2H), 7.43 (d,  $J$  = 8.3 Hz, 2H), 7.37 (t,  $J$  = 7.6 Hz, 1H), 2.69 (s, 3H).  $^{13}\text{C}$  NMR (100 MHz,  $\text{CDCl}_3$ )  $\delta$  157.1, 148.0, 145.0, 139.7, 130.1, 129.4, 129.2, 128.8, 127.6, 126.1, 123.6, 119.8, 19.0. HRMS (ESI-TOF) calcd for  $[\text{C}_{16}\text{H}_{12}\text{IN}]$  requires  $[\text{M}+\text{H}]^+$  346.0093 found 346.0071.

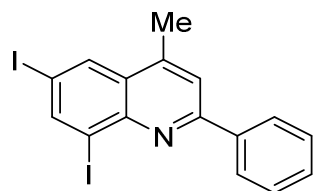

**6, 8-Diiodo-4-methyl-2-phenylquinoline (4d).** The product was crystallized in DCM/ hexane and obtained as light yellow crystals, (152.7 mg, 65% yield), mp 90–92 °C;  $^1\text{H}$  NMR (400 MHz,  $\text{CDCl}_3$ )  $\delta$  8.494–8.490 (m, 1H), 7.95–7.94 (m, 1H), 7.70 (s, 1H), 7.62–7.58 (m, 2H), 7.32–7.28 (m, 3H), 2.50 (s, 3H).  $^{13}\text{C}$  NMR (100 MHz,  $\text{CDCl}_3$ )  $\delta$  150.7, 148.9, 147.1, 140.8, 139.3, 133.4, 130.0, 128.9, 127.6, 121.7, 120.3, 114.6, 114.1, 19.0. HRMS (ESI-TOF) calcd for  $[\text{C}_{16}\text{H}_{11}\text{I}_2\text{N}]$  requires  $[\text{M}+\text{H}]^+$  471.9059 found 471.9036.

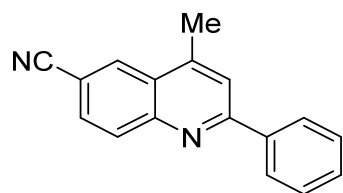

**4-Methyl-2-phenylquinoline-6-carbonitrile (4e).** The product was obtained as a yellow solid (102.4 mg, 84% yield), mp 100–102 °C;  $^1\text{H}$  NMR (400 MHz,  $\text{CDCl}_3$ )  $\delta$  8.32–8.31 (m, 1H), 8.15 (d,  $J$  = 8.3 Hz, 1H), 8.10 (dd,  $J$  = 8.0 and 1.5 Hz, 2H), 7.84 (d,  $J$  = 6.8 Hz, 1H), 7.76–7.75 (m, 1H), 7.62–7.60 (m, 1H), 7.46 (d,  $J$  = 7.6 Hz, 2H), 2.72 (s, 3H);  $^{13}\text{C}$  NMR (100 MHz,  $\text{CDCl}_3$ )  $\delta$  159.8, 149.3, 145.4, 138.7, 131.6, 130.1, 129.1, 129.0, 128.7, 128.4, 127.8, 121.1, 119.1, 109.3, 18.9. HRMS (ESI-TOF) ( $\text{M}+\text{H}$ ) $^+$  Calcd for  $\text{C}_{17}\text{H}_{12}\text{N}_2$  245.1079, found 245.1074.

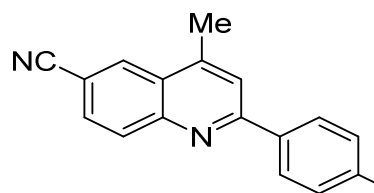

**2-(4-Ethylphenyl)-4-methylquinoline-6-carbonitrile (4f).** The product was obtained as a yellow solid, (111.5 mg, 82% yield), mp 102–104 °C;  $^1\text{H}$  NMR (400 MHz,  $\text{CDCl}_3$ )  $\delta$  8.379–8.375 (m, 1H), 8.20 (d,  $J$  = 8.3 Hz, 1H), 8.10 (d,  $J$  = 7.6 Hz, 2H), 7.84–7.84 (m, 1H), 7.82–7.81 (m, 1H), 7.37 (d,  $J$  = 8.3 Hz, 2H), 2.78 (s, 3H), 2.74 (q,  $J$  = 7.6 Hz, 2H), 1.29 (t,  $J$  = 7.6 Hz, 3H);  $^{13}\text{C}$  NMR (100 MHz,  $\text{CDCl}_3$ )  $\delta$  159.8, 149.3, 146.7, 145.2, 136.1, 131.5, 130.19, 130.02, 128.5, 128.1, 127.7, 125.6, 121.0, 109.1, 28.8, 18.9, 15.5. HRMS (ESI-TOF) ( $\text{M}+\text{H}$ ) $^+$  Calcd for  $[\text{C}_{19}\text{H}_{16}\text{N}_2]$  273.1392, found 273.1388.

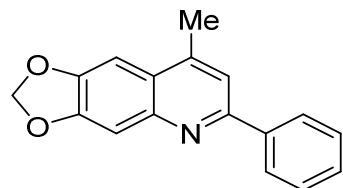

**8-Methyl-6-phenyl-[1,3]dioxolo[4,5-g]quinoline (4g).** The product was crystallised in DCM/ hexane and obtained as light yellow crystals, (105.2 mg, 80% yield), mp 114–116 °C,  $^1\text{H}$  NMR (400 MHz,  $\text{CDCl}_3$ )  $\delta$  8.02 (d,  $J$  = 7.6 Hz, 2H), 7.50 (s, 1H), 7.43 (t,  $J$  = 8.3 Hz, 2H), 7.36 (t,  $J$  = 6.8 Hz, 1H), 7.17–7.16 (m, 2H), 6.05 (s, 2H), 2.60 (s, 3H).  $^{13}\text{C}$  NMR (100 MHz,  $\text{CDCl}_3$ )  $\delta$  154.6, 150.8, 147.9, 139.3, 129.2, 128.8, 128.1, 127.5, 124.0, 118.6, 114.0, 105.9, 101.8, 99.3, 19.6. HRMS (ESI-TOF) calcd for  $[\text{C}_{17}\text{H}_{13}\text{NO}_2]$  requires  $[\text{M}+\text{H}]^+$  264.1025 found 264.1018.

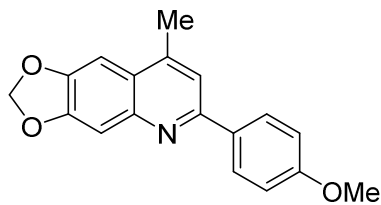

**6-(4-Methoxyphenyl)-8-methyl-[1,3]dioxolo[4,5-g]quinoline**

**(4h).** The product was crystallised in DCM/ hexane and obtained as light yellow crystals, (117.2 mg, 80% yield), mp 120–122 °C;  $^1\text{H}$  NMR (400 MHz,  $\text{CDCl}_3$ )  $\delta$  8.02 (d,  $J$  = 9.1 Hz, 2H), 7.47 (s, 1H), 7.41 (s, 1H), 7.16 (s, 1H), 6.98 (d,  $J$  = 9.1 Hz, 2H), 6.05 (s, 2H), 3.84 (s, 3H), 2.59 (s, 3H).  $^{13}\text{C}$  NMR (100 MHz,  $\text{CDCl}_3$ )  $\delta$  160.3, 154.6, 150.2, 147.3, 146.2, 143.3, 132.3, 128.4, 123.5, 117.8, 114.0, 106.3, 101.5, 99.2, 55.3, 19.4. HRMS (ESI-TOF) calcd for  $[\text{C}_{18}\text{H}_{15}\text{NO}_3]$  requires  $[\text{M}+\text{H}]^+$  294.1130 found 294.1133.

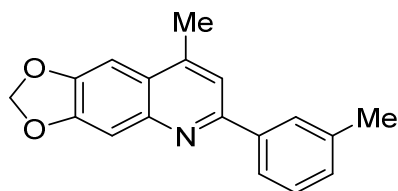

**8-Methyl-6-(*m*-tolyl)-[1,3]dioxolo[4,5-g]quinoline (4i).**

The product was crystallised in DCM/ hexane and obtained as light yellow crystals, (113.5 mg, 82% yield), mp 124–126 °C;  $^1\text{H}$  NMR (400 MHz,  $\text{CDCl}_3$ )  $\delta$  7.85 (s, 1H), 7.77 (d,  $J$  = 8.3 Hz, 1H), 7.49 (s, 1H), 7.41 (s, 1H), 7.31 (t,  $J$  = 8.3 Hz, 1H), 7.17–7.16 (m, 2H), 6.04 (s, 2H), 2.59 (s, 3H), 2.39 (s, 3H).  $^{13}\text{C}$  NMR (100 MHz,  $\text{CDCl}_3$ )  $\delta$  157.2, 155.7, 149.0, 143.4, 139.8, 138.4, 129.6, 129.2, 128.6, 127.9, 127.0, 124.3, 118.5, 101.62, 101.60, 99.3, 21.6, 19.5. HRMS (ESI-TOF) calcd for  $[\text{C}_{18}\text{H}_{15}\text{NO}_2]$  requires  $[\text{M}+\text{H}]^+$  278.1181 found 278.1177.

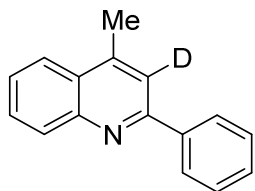

**4-Methyl-2-phenylquinoline-3-d (3a-D<sub>2</sub>).**

The product was crystallised in DCM/ hexane and obtained as yellow crystals (85.8 mg, 78% yield), mp 90–92 °C,  $^1\text{H}$  NMR (400 MHz,  $\text{CDCl}_3$ )  $\delta$  8.11 (d,  $J$  = 9.1 Hz, 1H), 8.07 (d,  $J$  = 8.3 Hz, 2H), 7.92 (d,  $J$  = 8.3 Hz, 1H), 7.64 (t,  $J$  = 8.3 Hz, 1.70 H), 7.49–7.43 (m, 3H), 7.40–7.36 (m, 1H), 2.70 (s, 3H). HRMS (ESI-TOF) calcd for  $[\text{C}_{16}\text{H}_{12}\text{DN}]$  requires  $[\text{M}+\text{H}]^+$  221.1169 found 221.1169.

#### General Procedure for the Synthesis of Quinolines (5a-d)



In an oven-dried round bottom flask, hydrazones **1a** (0.5 mmol), alkyne **2m–n** (0.6 mmol) and Rhodium catalyst (2.5 mol %) in 2.0 mL of acetonitrile were added under inert atmosphere. The resulting reaction mixture was heated at 80 °C for 24 h for the synthesis of **5a–b**. Next, for the synthesis of **5c–d**, hydrazones **1a** (1.0 mmol), alkyne **2m–n** (0.6 mmol) and Rhodium catalyst (2.5 mol %) in 2.0 mL of acetonitrile. Progression of the reaction was monitored by TLC analysis; after complete consumption of starting material, the reaction was cooled to room temperature. The reaction mixture was diluted with ethyl acetate (10 mL) and water (15 mL). The layers were separated, and the organic layer was washed with aqueous saturated brine solution and dried over Na<sub>2</sub>SO<sub>4</sub>. Organic layer was concentrated under reduced pressure. The crude material so obtained was purified by column chromatography on silica gel (100–200) (hexane: ethyl acetate; 90/10). The structure and purity of known starting materials were confirmed by comparison of their physical and spectral data (<sup>1</sup>H NMR, <sup>13</sup>C NMR, and HRMS).

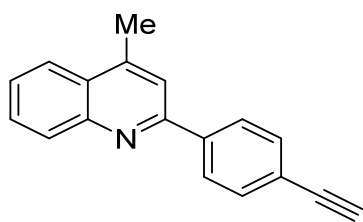

**2-(4-Ethynylphenyl)-4-methylquinoline (5a).** The product was obtained as a yellow semi-solid (80.1 mg, 66% yield), mp 110–112 °C; <sup>1</sup>H NMR (400 MHz, CDCl<sub>3</sub>) δ 7.85–7.82 (m, 2H), 7.64 (dd, *J* = 8.3 and 1.5 Hz, 2H), 7.51–7.49 (m, 2H), 7.29 (s, 1H), 7.238–7.232 (m, 2H), 3.06 (s, 1H), 2.53 (s, 3H); <sup>13</sup>C NMR (100 MHz, CDCl<sub>3</sub>) δ 159.7, 149.4, 144.8, 139.3, 134.4, 132.1, 129.3, 128.1, 127.6, 127.0, 125.6, 125.2, 120.4, 83.7, 80.4, 20.7. HRMS (ESI-TOF) (*M*+*H*)<sup>+</sup>Calcd for [C<sub>18</sub>H<sub>13</sub>N] 244.1126, found 244.1124.

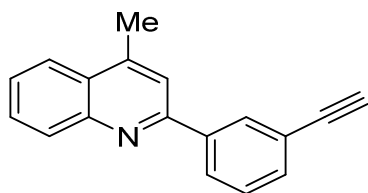

**2-(3-Ethynylphenyl)-4-methylquinoline (5b).** The product was obtained as a yellow solid (72.9 mg, 60% yield), mp 108–110 °C; <sup>1</sup>H NMR (400 MHz, CDCl<sub>3</sub>) δ 8.21 (s, 1H), 8.10–8.09 (m, 2H), 7.93 (d, *J* = 8.3 Hz, 1H), 7.68–7.60 (m, 2H), 7.51–7.49 (m, 2H), 7.41 (t, *J* = 7.6 Hz, 1H), 3.06 (s, 1H), 2.70 (s, 3H); <sup>13</sup>C NMR (100 MHz, CDCl<sub>3</sub>) δ 155.8, 147.8, 145.4, 136.3, 132.8, 131.3, 130.0, 130.1, 128.9, 128.4, 128.1, 127.3, 126.4, 123.7, 119.6, 78.3, 19.1. HRMS (ESI-TOF) (*M*+*H*)<sup>+</sup>Calcd for [C<sub>18</sub>H<sub>13</sub>N] 244.1126, found 244.1124.

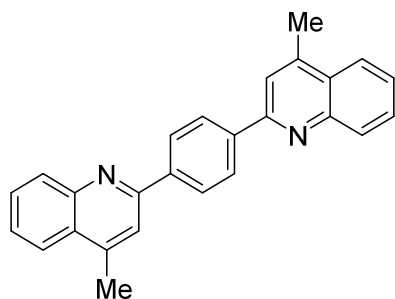

**1,4-bis(4-Methylquinolin-2-yl)benzene (5c).** The product was obtained as a yellow semi-solid (100.8 mg, 56% yield), mp 159–160 °C;  $^1\text{H}$  NMR (400 MHz,  $\text{CDCl}_3$ )  $\delta$  7.84 (d,  $J$  = 8.3 Hz, 2H), 7.69–7.65 (m, 2H), 7.53–7.49 (m, 2H), 7.46–7.40 (m, 3H), 7.29 (s, 2H), 7.22 (d,  $J$  = 7.6 Hz, 2H), 7.12–7.10 (m, 1H), 2.53 (s, 3H), 2.51 (s, 3H);  $^{13}\text{C}$  NMR (100 MHz,  $\text{CDCl}_3$ )  $\delta$  157.5, 147.8, 146.3, 134.5, 132.3, 132.3, 132.1, 132.0, 129.2, 128.2, 128.2, 126.7, 125.2, 122.8, 19.4. HRMS (ESI-TOF) ( $\text{M}+\text{H}$ ) $^+$  Calcd for  $[\text{C}_{26}\text{H}_{20}\text{N}_2]$  361.1705, found 361.1701.

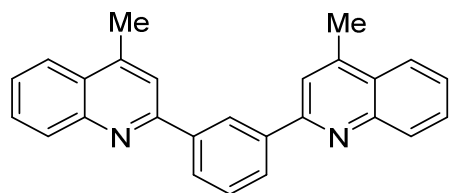

**1,3-bis(4-Methylquinolin-2-yl)benzene (5d).** The product was obtained as a yellow solid (93.6 mg, 52% yield), mp 150–152 °C;  $^1\text{H}$  NMR (400 MHz,  $\text{CDCl}_3$ )  $\delta$  8.20 (s, 2H), 8.12 (d,  $J$  = 7.6 Hz, 1H), 8.00 (s, 1H), 7.95 (d,  $J$  = 8.3 Hz, 1H), 7.87–7.85 (m, 1H), 7.70–7.66 (m, 1H), 7.64 (s, 1H), 7.60 (d,  $J$  = 7.6 Hz, 1H), 7.53–7.49 (m, 2H), 7.44–7.42 (m, 1H), 7.39 (d,  $J$  = 9.1 Hz, 1H), 7.36–7.34 (m, 1H), 2.72 (s, 3H), 2.53 (s, 3H);  $^{13}\text{C}$  NMR (100 MHz,  $\text{CDCl}_3$ )  $\delta$  156.1, 145.2, 145.1, 138.1, 135.1, 130.8, 130.1, 127.6, 127.1, 126.9, 126.4, 125.7, 122.4, 118.4, 19.5. HRMS (ESI-TOF) ( $\text{M}+\text{H}$ ) $^+$  Calcd for  $[\text{C}_{26}\text{H}_{20}\text{N}_2]$  361.1705, found 361.1709.

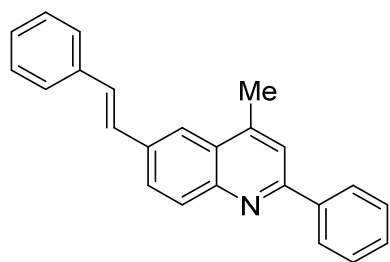

**(E)-4-Methyl-2-phenyl-6-styrylquinoline (8a).** The product was obtained as a yellow semi-solid (96.3 mg, 60% yield), mp 140–142 °C;  $^1\text{H}$  NMR (400 MHz,  $\text{CDCl}_3$ )  $\delta$  8.08–8.06 (m, 3H), 7.93–7.89 (m, 2H), 7.63 (s, 1H), 7.51 (d,  $J$  = 6.8 Hz, 2H), 7.47–7.43 (m, 2H), 7.40–7.38 (m, 1H), 7.34–7.30 (m, 2H), 7.22–7.20 (m, 2H), 7.18–7.17 (m, 1H), 2.71 (s, 3H);  $^{13}\text{C}$  NMR (100 MHz,  $\text{CDCl}_3$ )  $\delta$  156.7, 147.9, 144.7, 139.7, 137.1, 134.9, 130.6, 129.6,

129.2, 128.78, 128.75, 128.3, 127.9, 127.4, 126.8, 126.6, 122.3, 120.2, 19.1. HRMS (ESI-TOF) (M+H)<sup>+</sup>Calcd for [C<sub>24</sub>H<sub>19</sub>N] 322.1596, found 322.1584.

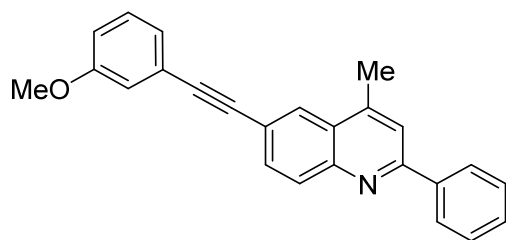

**6-((3-Methoxyphenyl)ethynyl)-4-methyl-2-**

**phenylquinoline (8b).** The product was obtained as a yellow semi-solid (150.0 mg, 86% yield), mp 130–132 °C; <sup>1</sup>H NMR (400 MHz, CDCl<sub>3</sub>) δ 8.12–8.11 (m, 1H), 8.08–8.07 (m, 2H), 8.06–8.04 (m, 1H), 7.74 (dd, *J* = 8.3 and 1.5 Hz, 1H), 7.66 (s, 1H), 7.47–7.43 (m, 2H), 7.40 (d, *J* = 7.6 Hz, 1H), 7.24–7.18 (m, 2H), 7.12 (d, *J* = 7.6 Hz, 1H), 7.05 (s, 1H), 3.77 (s, 3H), 2.70 (s, 3H); <sup>13</sup>C NMR (100 MHz, CDCl<sub>3</sub>) δ 159.4, 157.6, 147.6, 144.6, 139.4, 132.0, 130.3, 129.5, 129.4, 128.8, 127.5, 127.3, 127.0, 124.2, 124.0, 120.7, 120.3, 116.3, 115.2, 90.3, 89.4, 55.3, 19.0. HRMS (ESI-TOF) (M+H)<sup>+</sup>Calcd for [C<sub>25</sub>H<sub>19</sub>NO] 350.1545, found 350.1537.

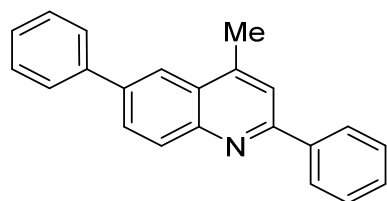

**4-Methyl-2,6-diphenylquinoline (8c).**

The product was obtained as a yellow semi-solid (97.3 mg, 66% yield), mp 114–116 °C; <sup>1</sup>H NMR (400 MHz, CDCl<sub>3</sub>) δ 8.19 (d, *J* = 8.3 Hz, 1H), 8.10–8.08 (m, 3H), 7.91 (dd, *J* = 8.7 and 2.2 Hz, 1H), 7.68–7.66 (m, 3H), 7.48–7.42 (m, 3H), 7.40 (d, *J* = 6.8 Hz, 1H), 7.34 (d, *J* = 7.6 Hz, 2H), 2.74 (s, 3H); <sup>13</sup>C NMR (100 MHz, CDCl<sub>3</sub>) δ 156.9, 146.4, 140.8, 138.8, 129.3, 129.1, 128.9, 128.8, 128.2, 128.1, 127.7, 127.6, 127.5, 127.0, 125.6, 121.5, 120.2, 19.2. HRMS (ESI-TOF) (M+H)<sup>+</sup>Calcd for [C<sub>22</sub>H<sub>17</sub>N] 296.1439, found 296.1429.

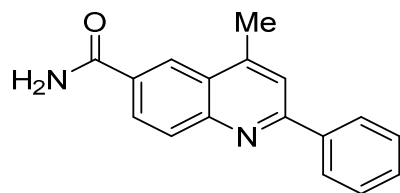

**4-Methyl-2-phenylquinoline-6-carboxamide (8d).**

The product was obtained as a yellow solid (112.6 mg, 86% yield), mp 120–122 °C; <sup>1</sup>H NMR (400 MHz, CDCl<sub>3</sub>) δ 7.35–7.33 (m, 1H), 7.29–7.24 (m, 3H), 7.08–7.04 (m, 2H), 6.87 (t, *J* = 6.8 Hz, 1H),

6.74–6.70 (m, 2H), 5.72 (brs, 2H), 2.29 (s, 3H);  $^{13}\text{C}$  NMR (100 MHz,  $\text{CDCl}_3$ )  $\delta$  169.2, 159.9, 149.7, 146.2, 146.0, 139.3, 130.6, 128.4, 128.1, 127.6, 126.8, 124.7, 120.4, 114.1, 19.1; HRMS (ESI-TOF)  $(\text{M}+\text{H})^+$  Calcd for  $[\text{C}_{17}\text{H}_{14}\text{N}_2\text{O}]$  263.1184, found 263.1184.

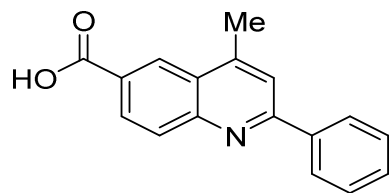

**4-Methyl-2-phenylquinoline-6-carboxylic acid (8e).** The product

was obtained as a yellow solid (93.0 mg, 83% yield), mp 196–198 °C;  $^1\text{H}$  NMR (400 MHz,  $\text{DMSO}-d_6$ )  $\delta$  13.2 (s, 1H), 8.664–8.660 (m, 1H), 8.265 (dd,  $J$  = 6.8 and 2.2 Hz, 2H), 8.18 (dd,  $J$  = 7.2 and 1.8 Hz, 1H), 8.108–8.100 (m, 2H), 7.55–7.49 (m, 3H), 2.79 (s, 3H);  $^{13}\text{C}$  NMR (100 MHz,  $\text{DMSO}-d_6$ )  $\delta$  167.8, 162.6, 158.3, 150.0, 147.5, 130.6, 129.4, 128.5, 127.9, 127.2, 126.7, 120.8, 119.5, 19.0; HRMS (ESI-TOF)  $(\text{M}+\text{H})^+$  Calcd for  $[\text{C}_{17}\text{H}_{13}\text{NO}_2]$  264.1025, found 264.1042.

# **Copies of $^1\text{H}$ NMR, $^{13}\text{C}$ NMR and HRMS**

$^1\text{H}$  NMR

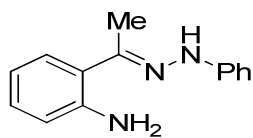

**(*E*)-2-(1-(2-Phenylhydrazono)ethyl)aniline (1a)**

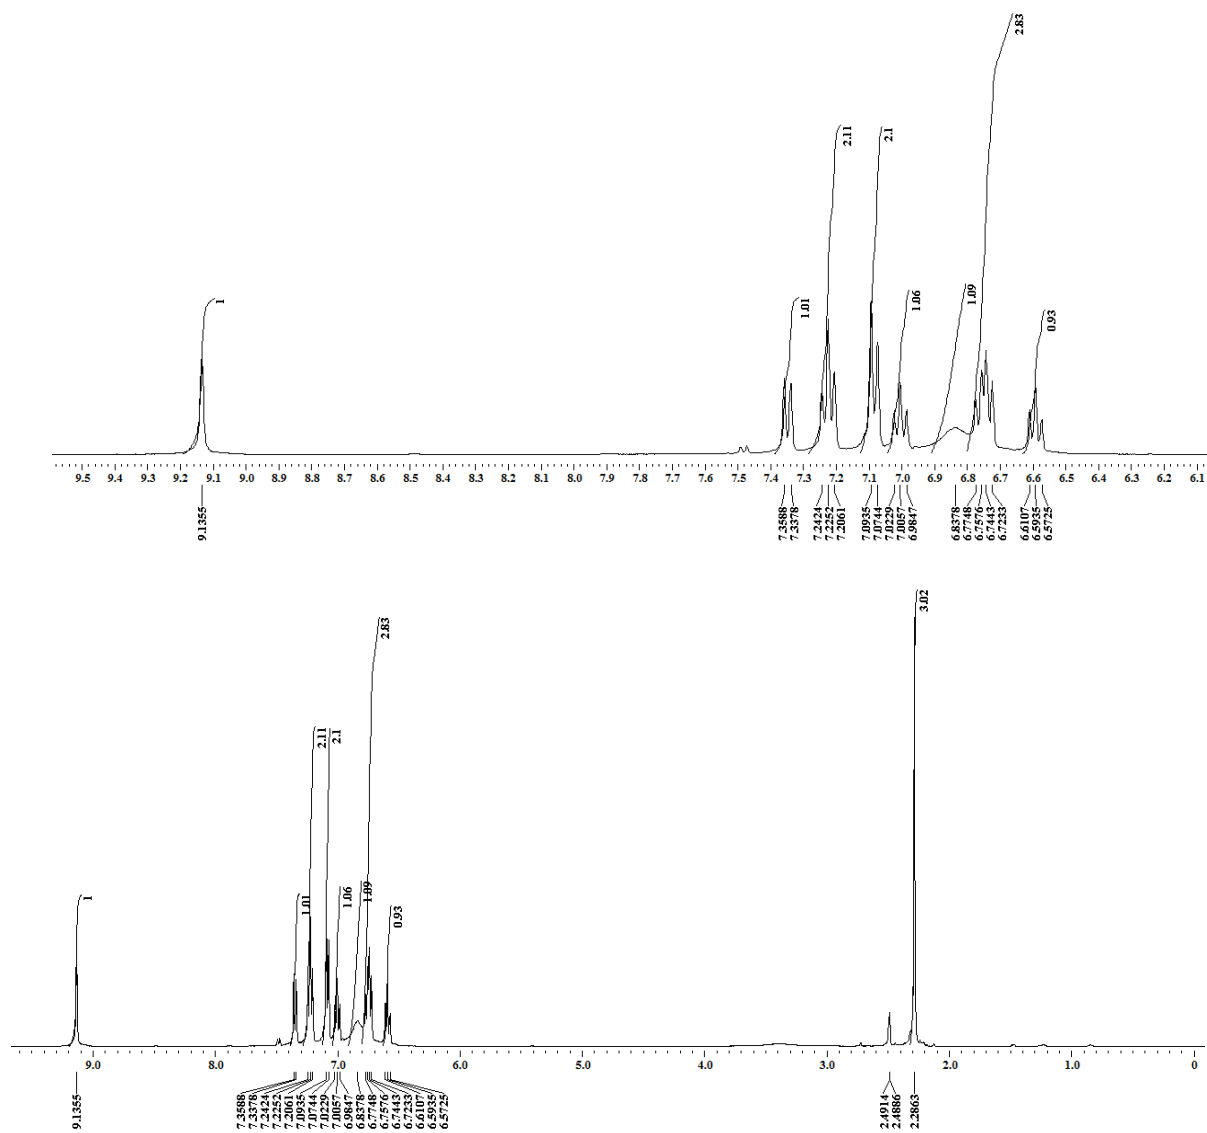

<sup>13</sup>C NMR

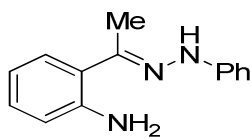

**(E)-2-(1-(2-Phenylhydrazono)ethyl)aniline (1a)**

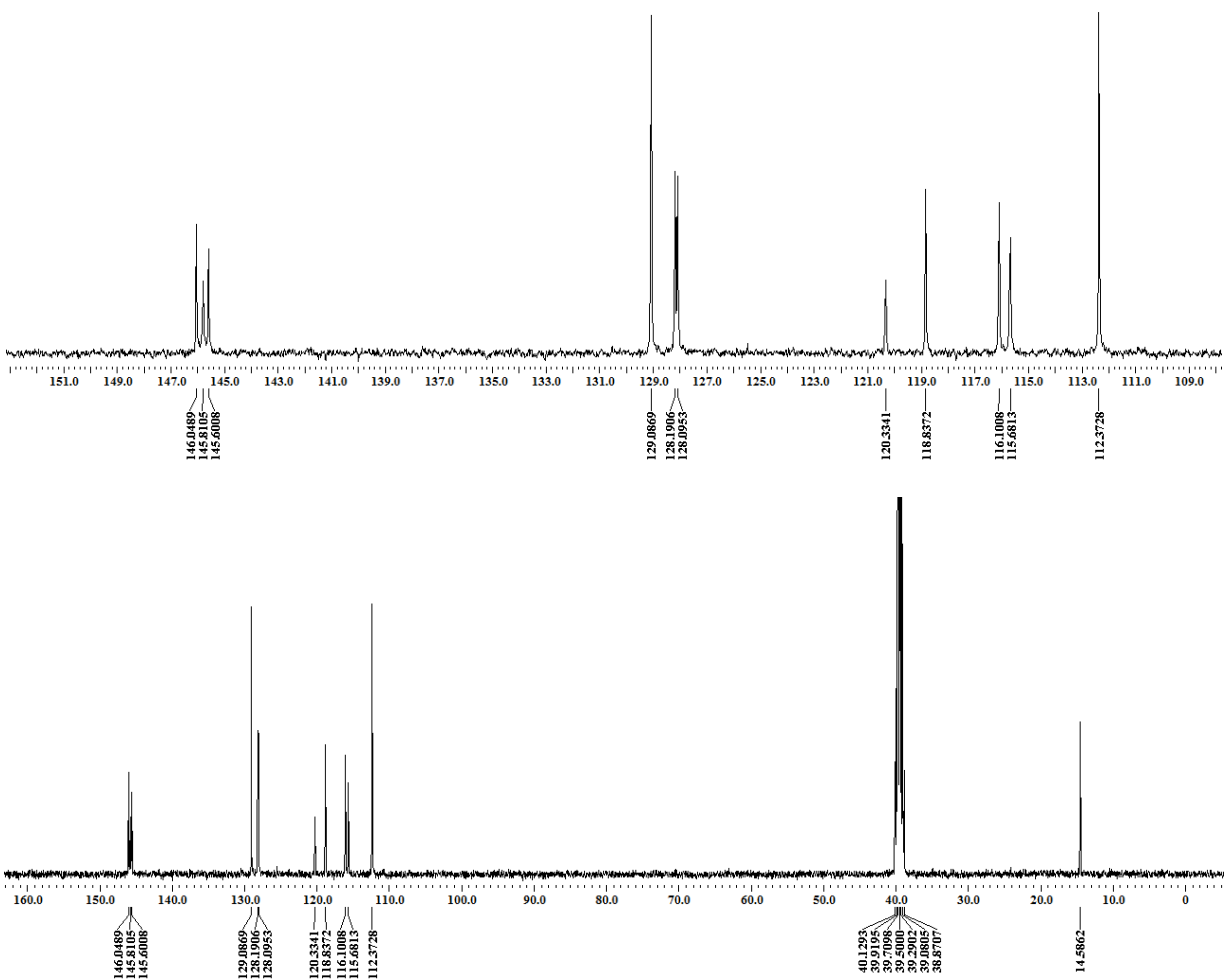

## HRMS

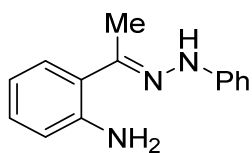

**(*E*)-2-(1-(2-Phenylhydrazono)ethyl)aniline (1a)**

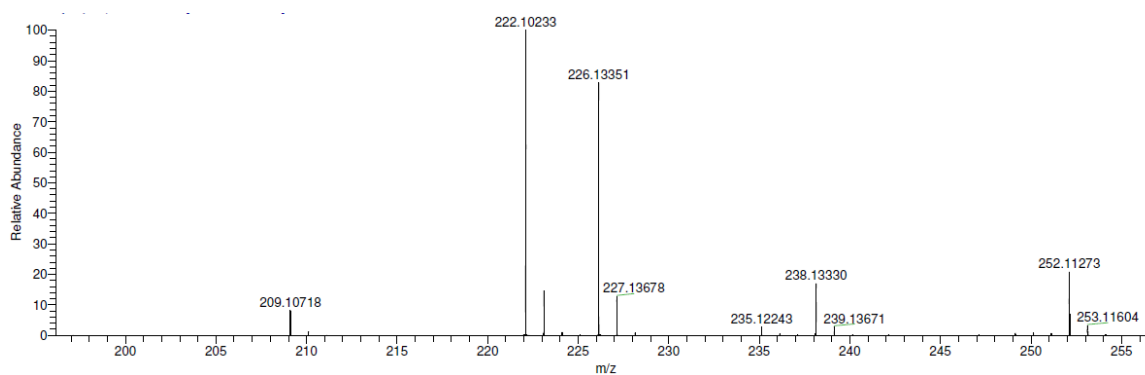



<sup>1</sup>H NMR

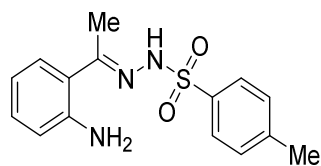

**(E)-N'-(1-(2-Aminophenyl)ethylidene)-4-methylbenzenesulfonohydrazide (1b)**

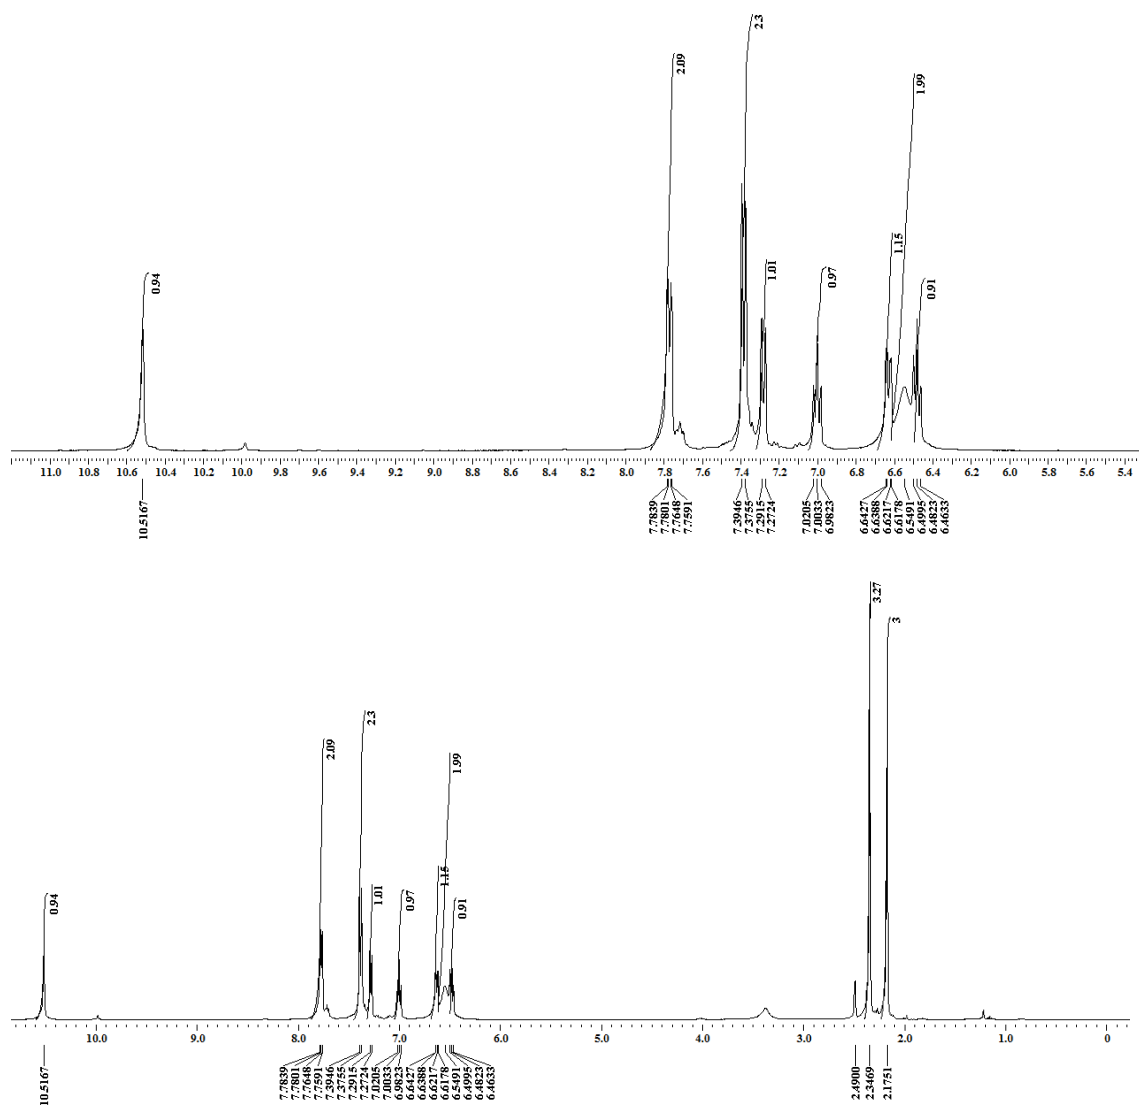

<sup>13</sup>C NMR



**(*E*)-*N'*-(1-(2-Aminophenyl)ethylidene)-4-methylbenzenesulfonohydrazide (1b)**

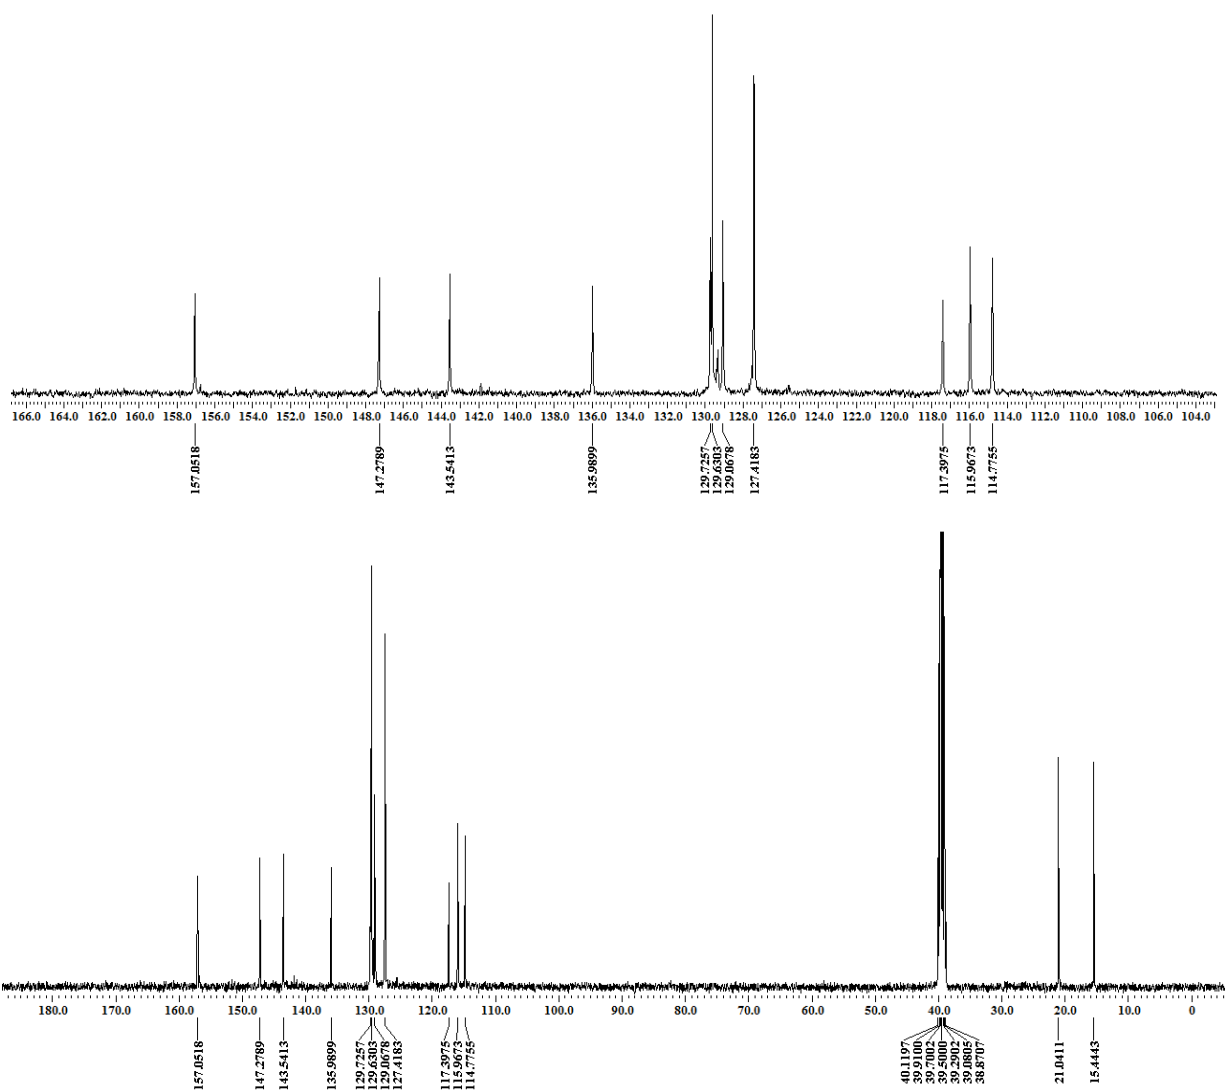

## HRMS

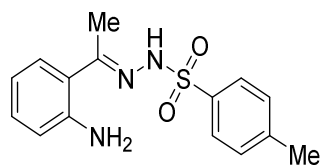

**(E)-N'-(1-(2-Aminophenyl)ethylidene)-4-methylbenzenesulfonohydrazide (1b)**

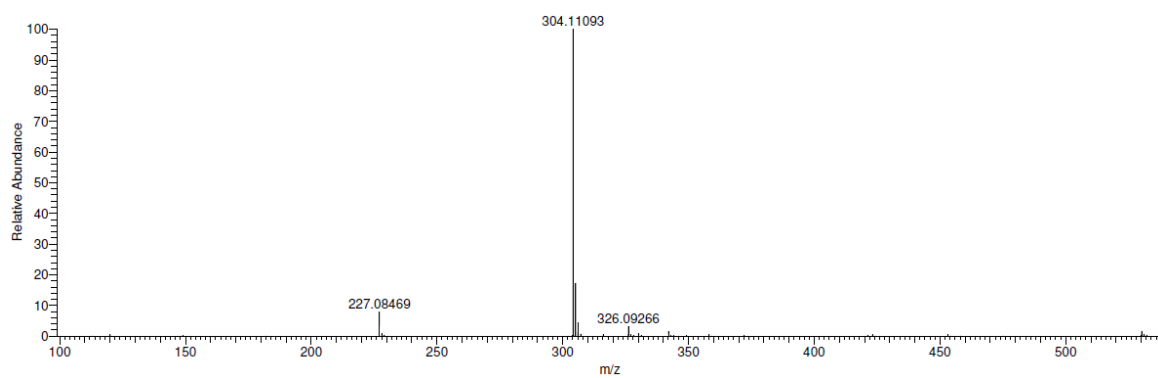

<sup>1</sup>H NMR

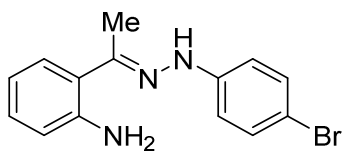

**(*E*)-2-(1-(2-(4-Bromophenyl)hydrazono)ethyl)aniline (1c)**

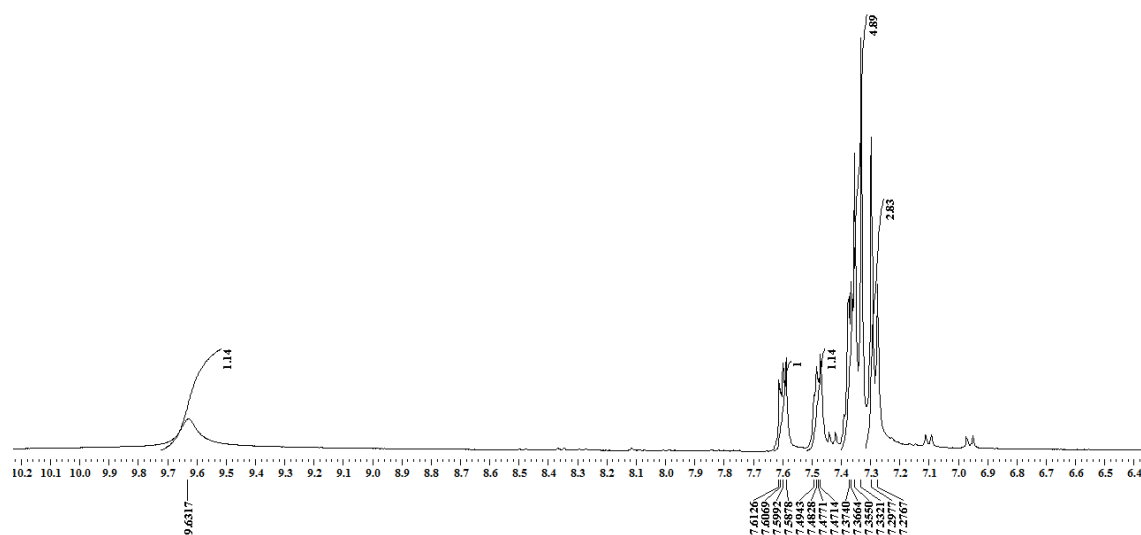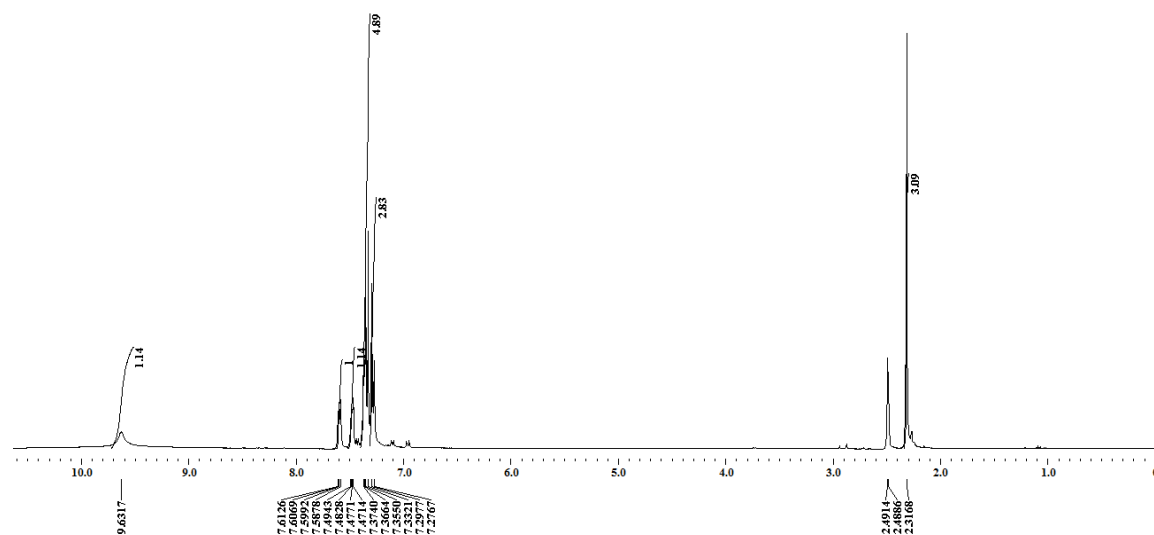

<sup>13</sup>C NMR

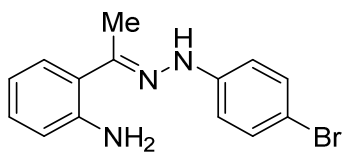

**(*E*)-2-(1-(2-(4-Bromophenyl)hydrazono)ethyl)aniline (1c)**

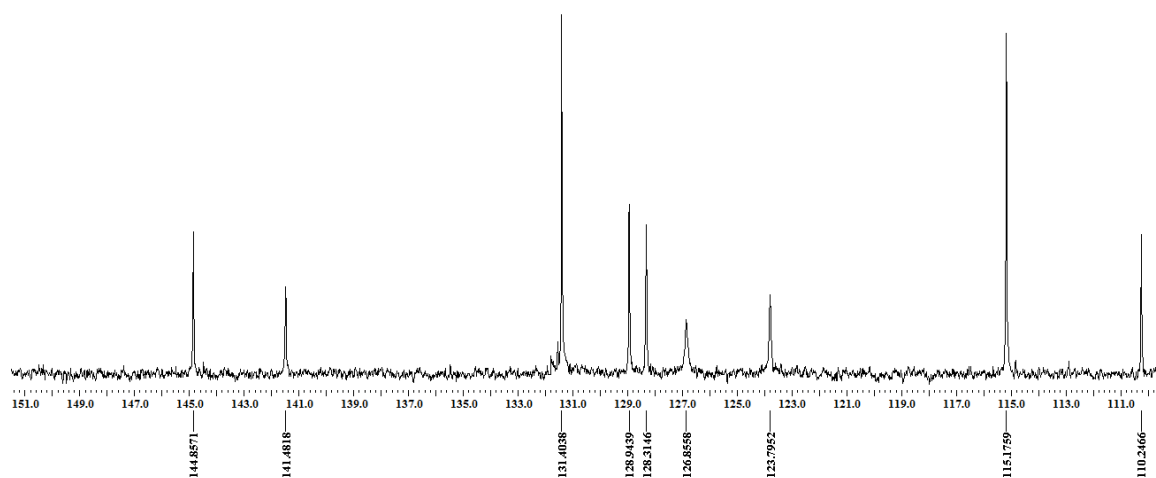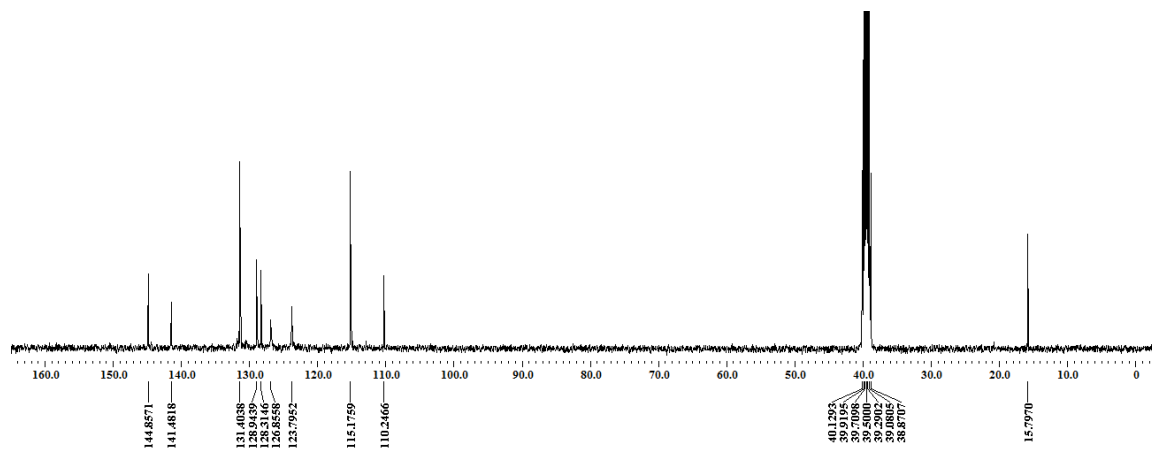

## HRMS

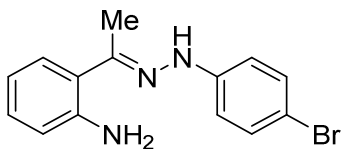

**(*E*)-2-(1-(2-(4-Bromophenyl)hydrazono)ethyl)aniline (1c)**

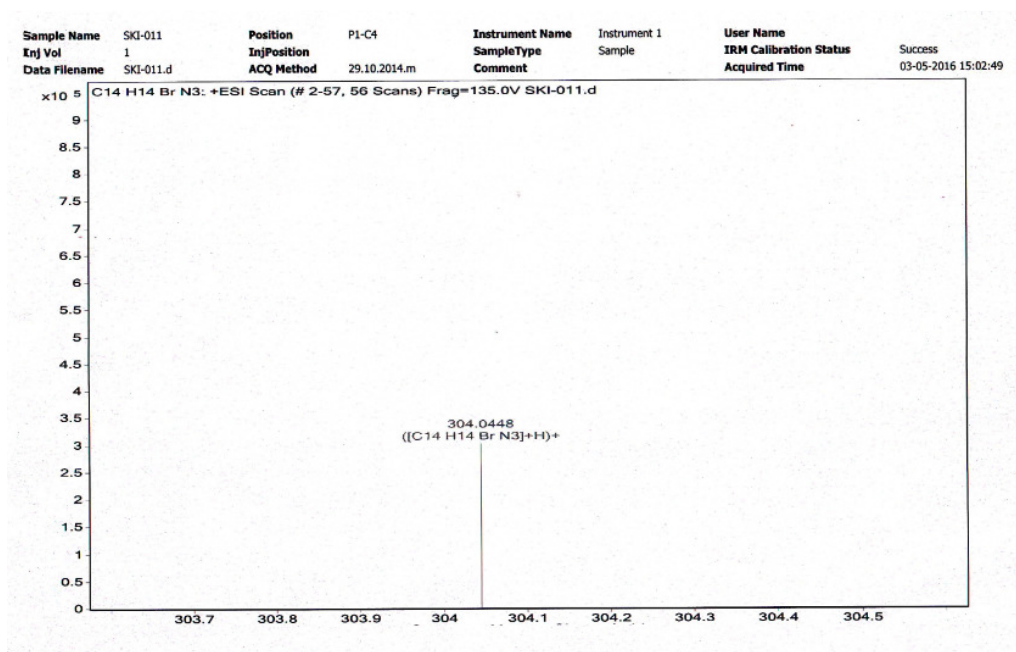

<sup>1</sup>H NMR

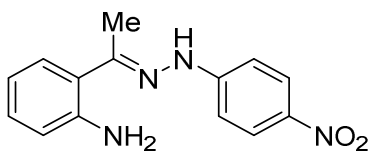

**(*E*)-2-(1-(2-(4-Nitrophenyl)hydrazono)ethyl)aniline (1d)**

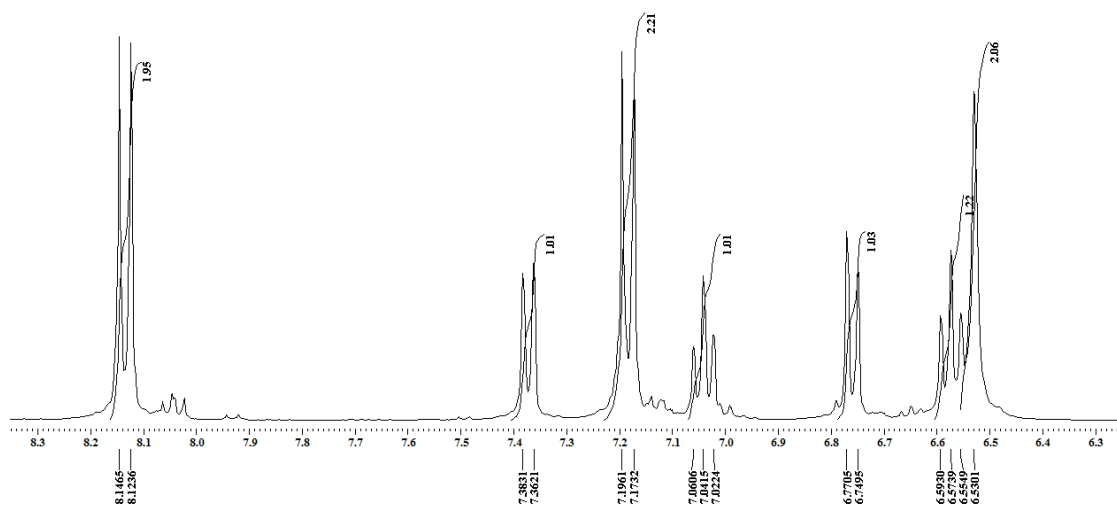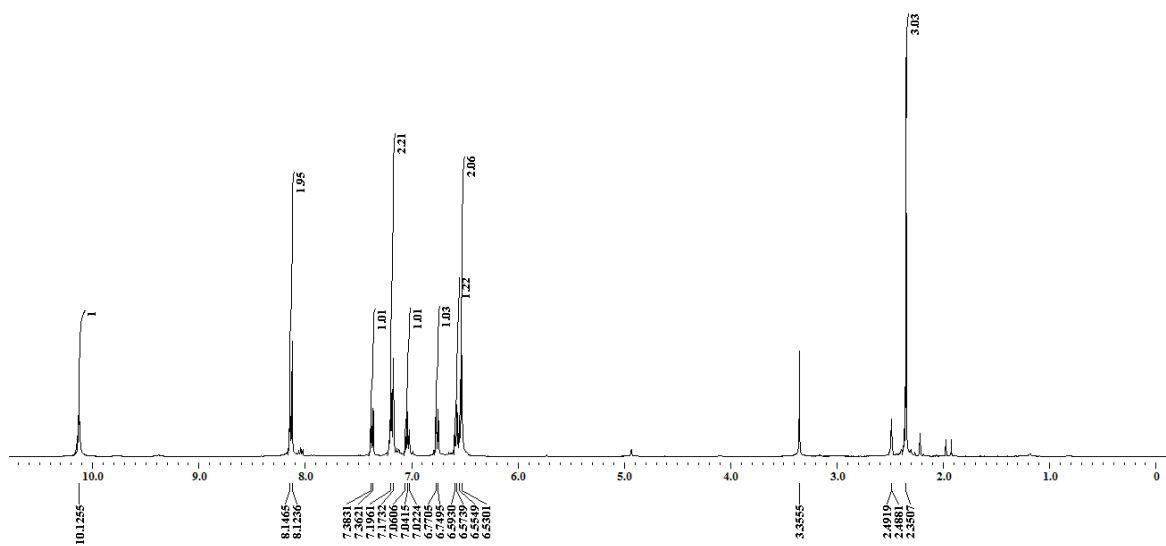

<sup>13</sup>C NMR

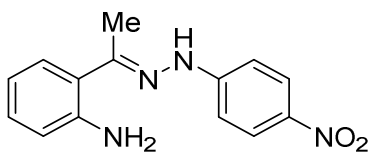

**(*E*)-2-(1-(2-(4-Nitrophenyl)hydrazono)ethyl)aniline (1d)**

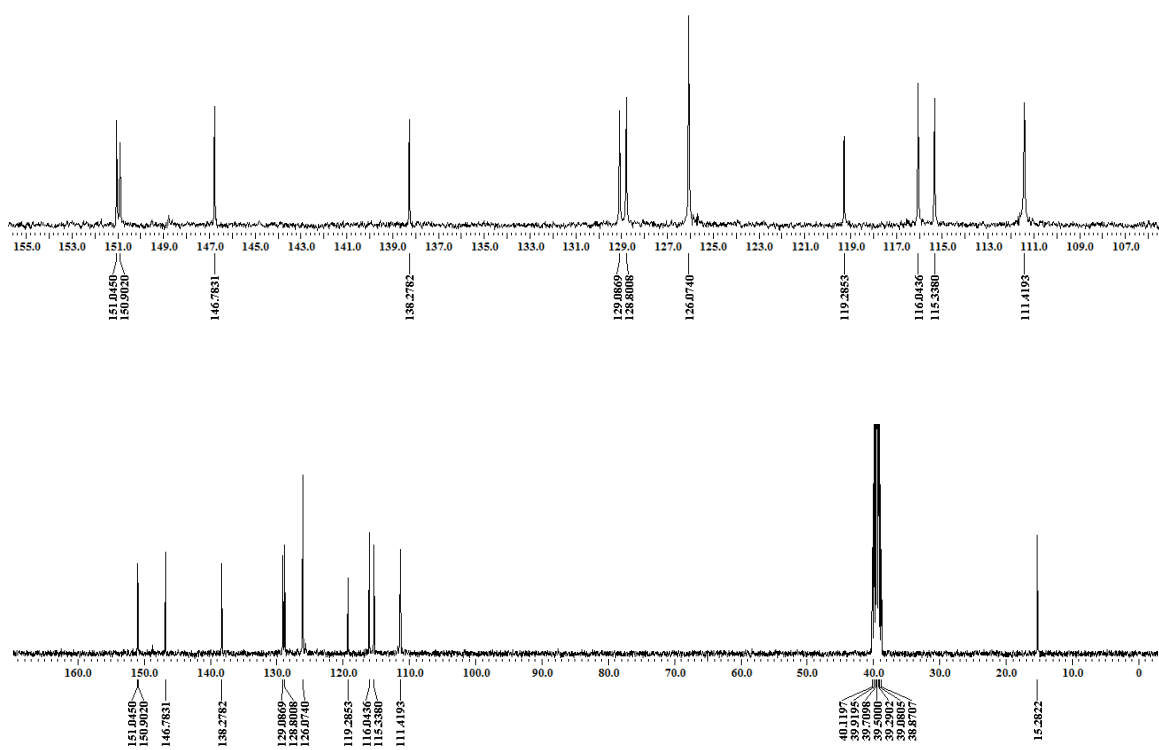



## HRMS

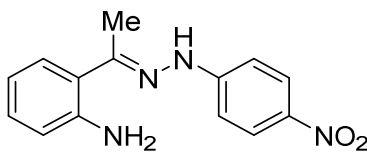

**(*E*)-2-(1-(2-(4-Nitrophenyl)hydrazono)ethyl)aniline (1d)**

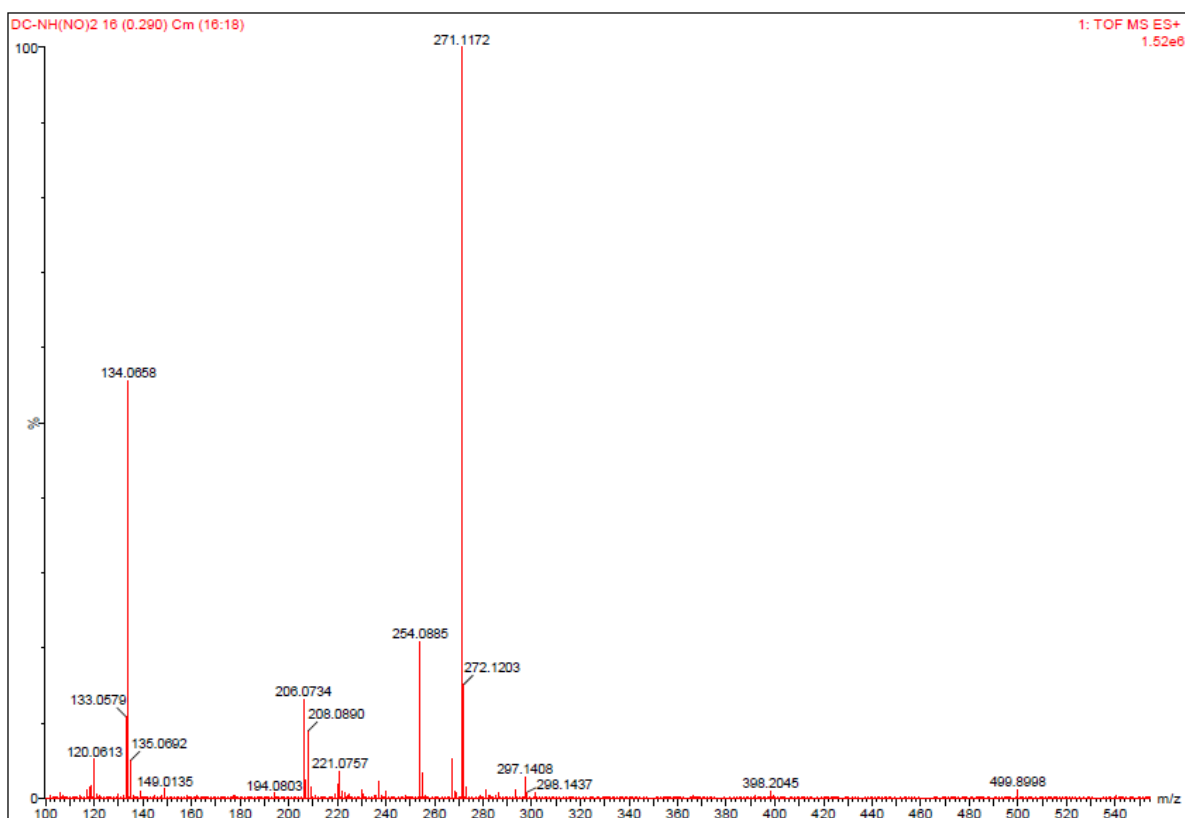

<sup>1</sup>H NMR

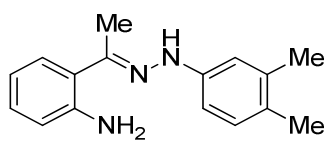

**(*E*)-2-(1-(2-(3,4-Dimethylphenyl)hydrazono)ethyl)aniline (1e)**

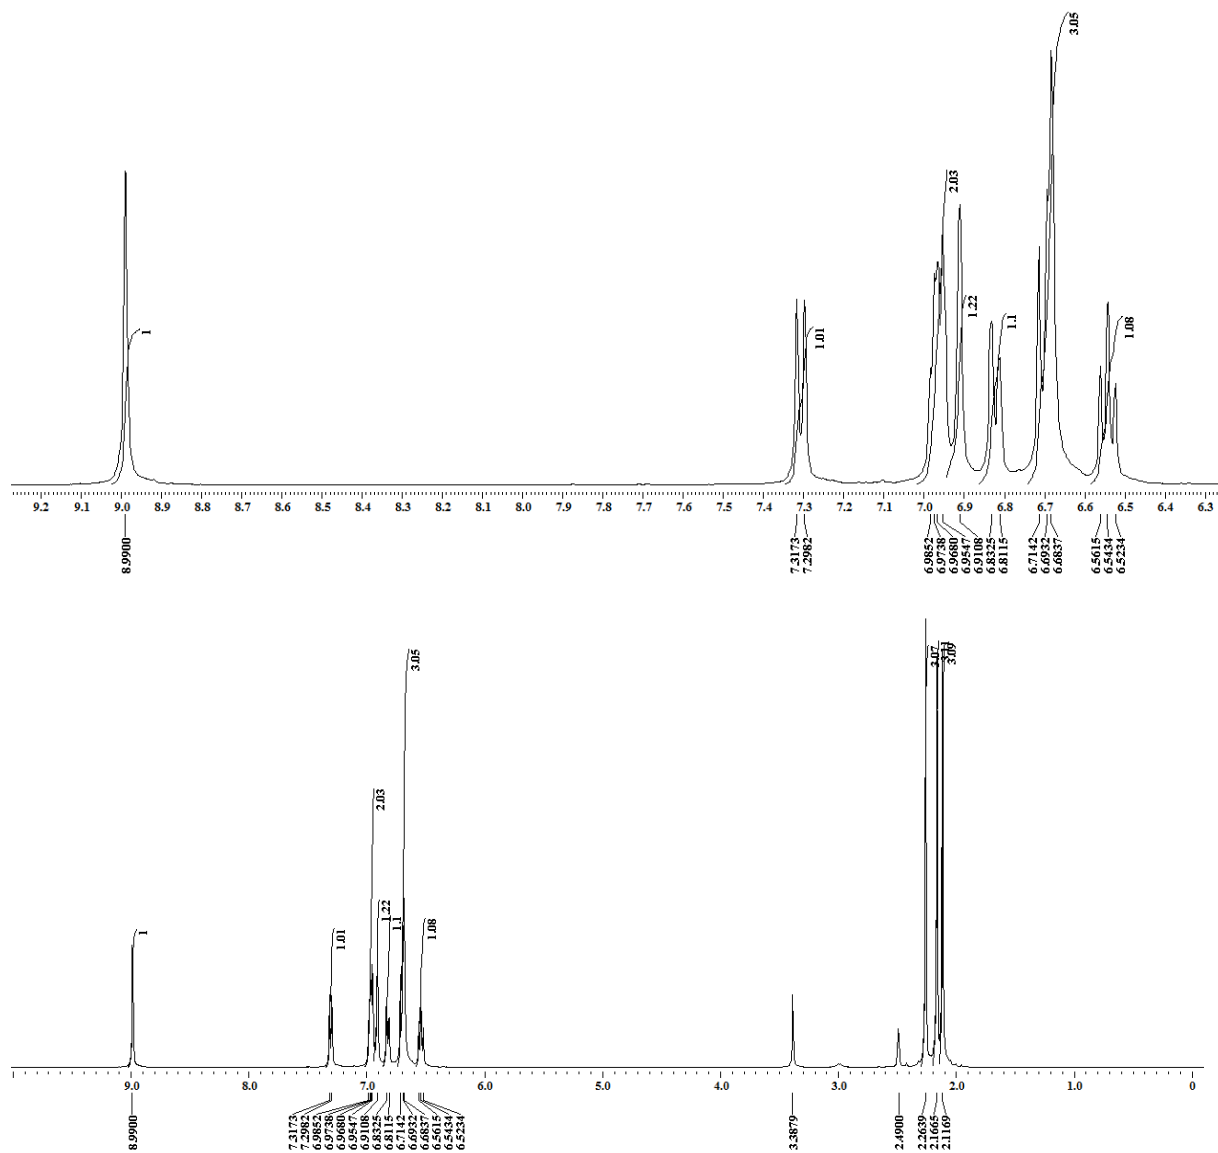

<sup>13</sup>C NMR



**(*E*)-2-(1-(2-(3,4-Dimethylphenyl)hydrazono)ethyl)aniline (1e)**

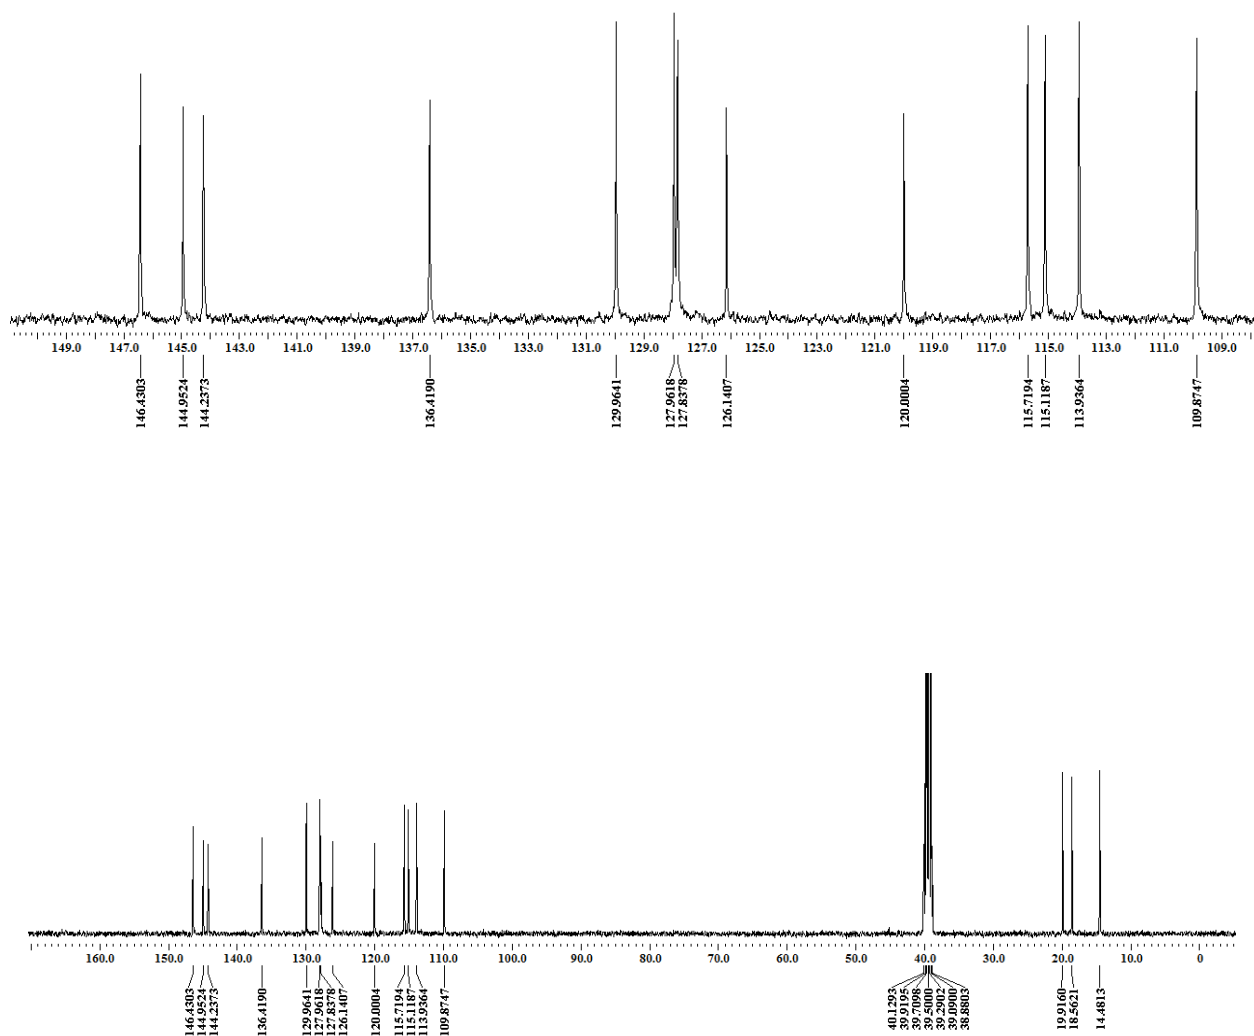

# HRMS

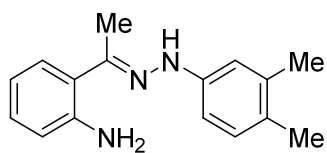

**(*E*)-2-(1-(2-(3,4-Dimethylphenyl)hydrazono)ethyl)aniline (1e)**

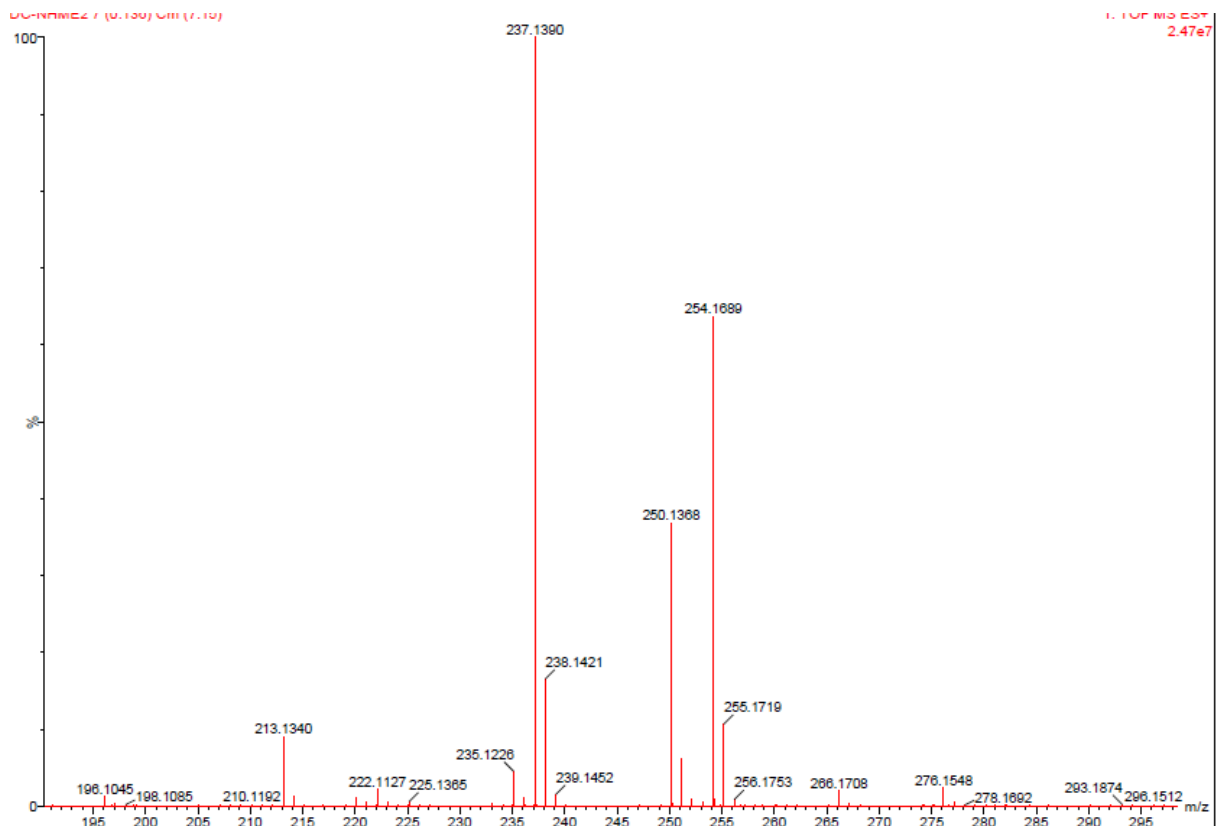

<sup>1</sup>H NMR

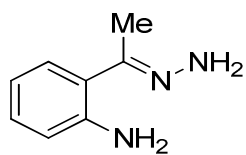

**(*E*)-2-(1-Hydrazonoethyl)aniline (1f)**

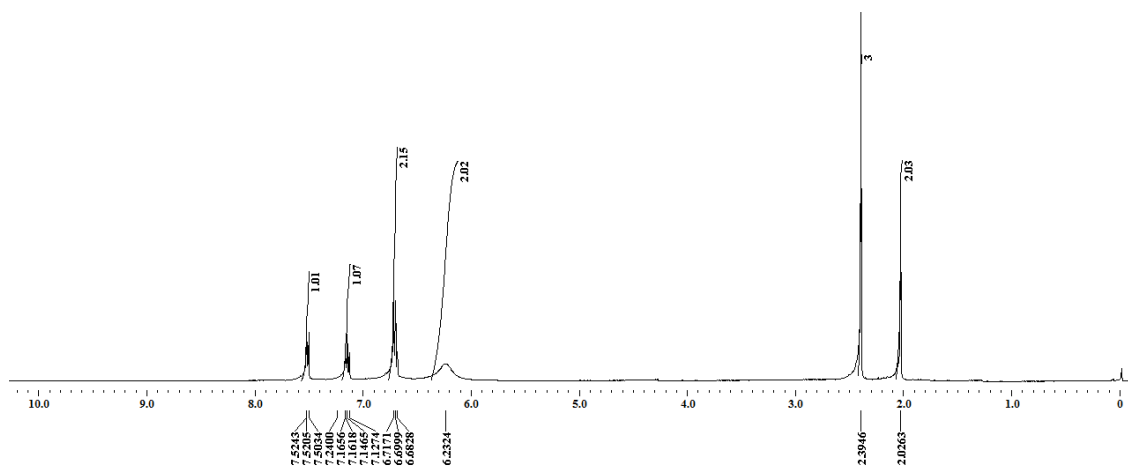

<sup>13</sup>C NMR

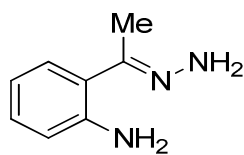

**(*E*)-2-(1-Hydrazonoethyl)aniline (1f)**

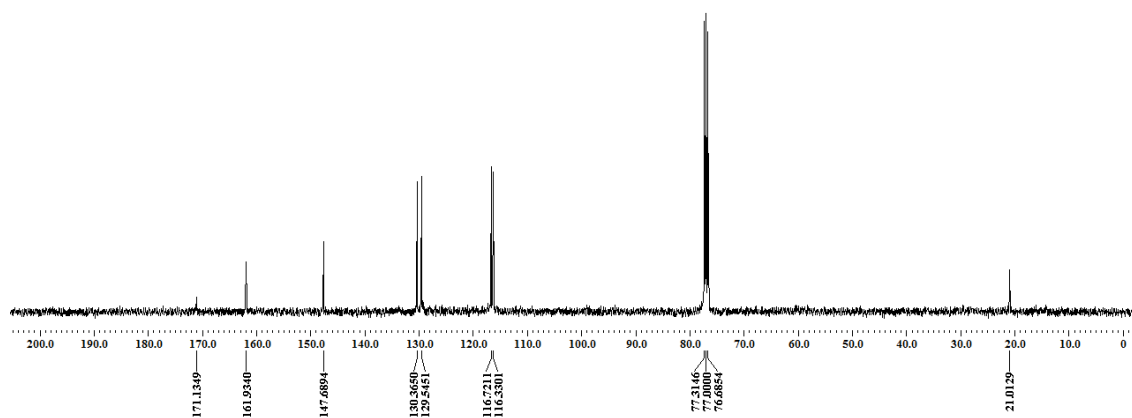

# HRMS

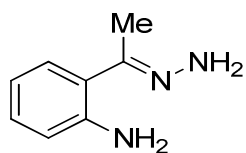

**(*E*)-2-(1-Hydrazonoethyl)aniline (1f)**

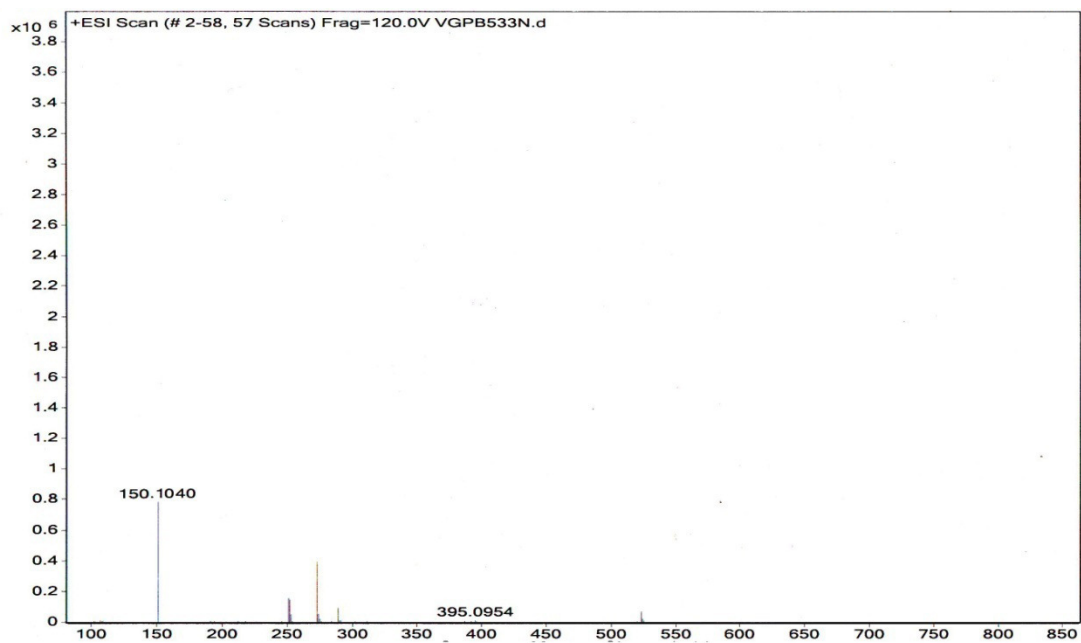

<sup>1</sup>H NMR

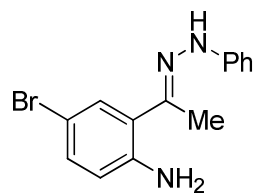

**(E)-4-Bromo-2-(1-(2-phenylhydrazono)ethyl)aniline (1g)**

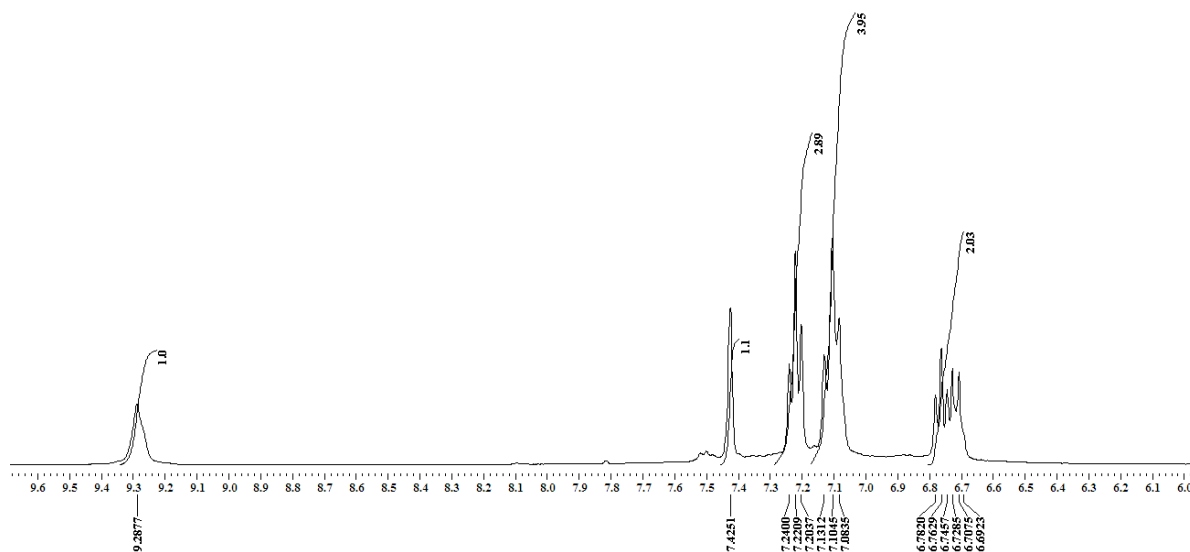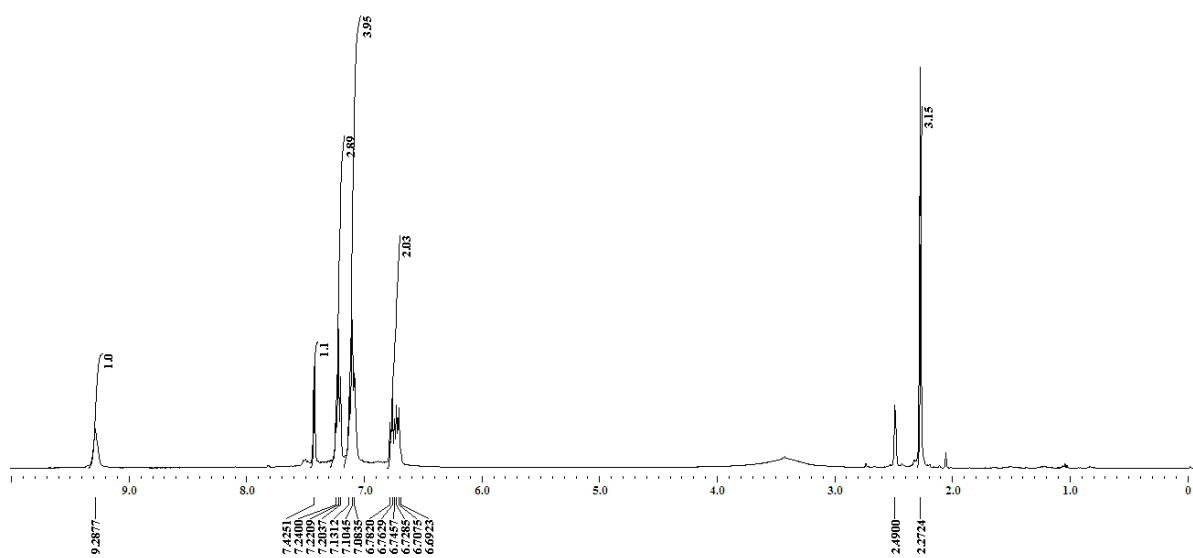



<sup>13</sup>C NMR

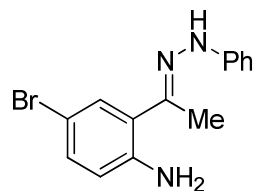

**(E)-4-Bromo-2-(1-(2-phenylhydrazono)ethyl)aniline (1g)**

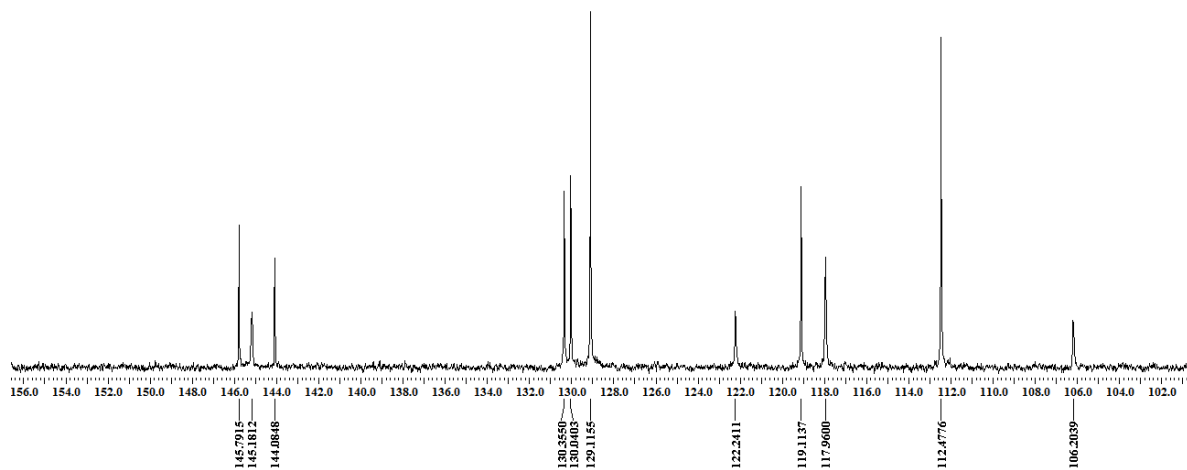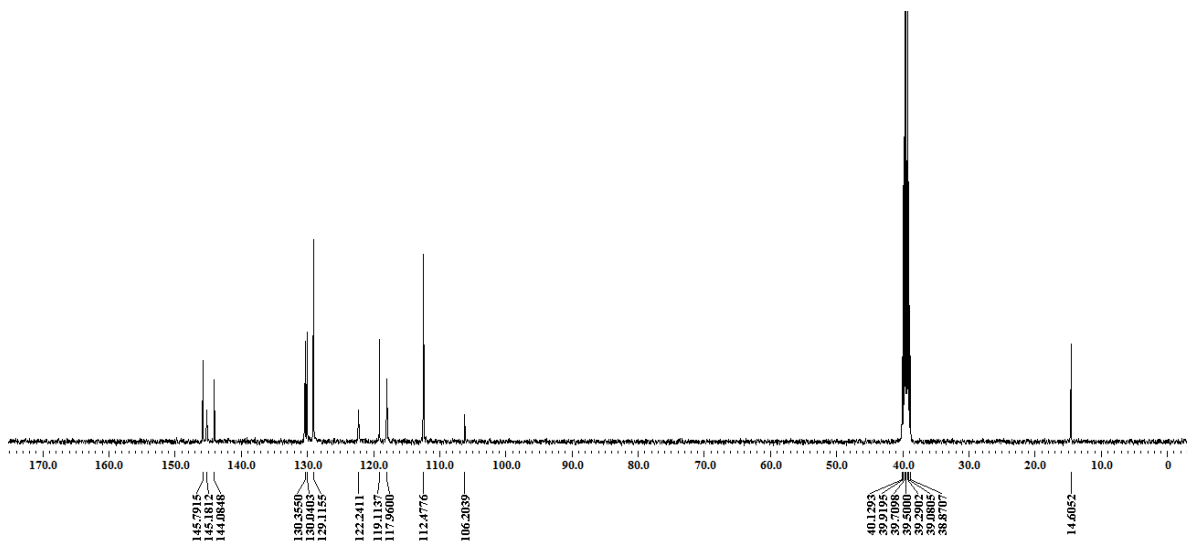

# HRMS

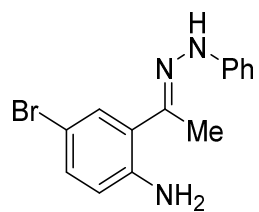

**(*E*)-4-Bromo-2-(1-(2-phenylhydrazono)ethyl)aniline (1g)**

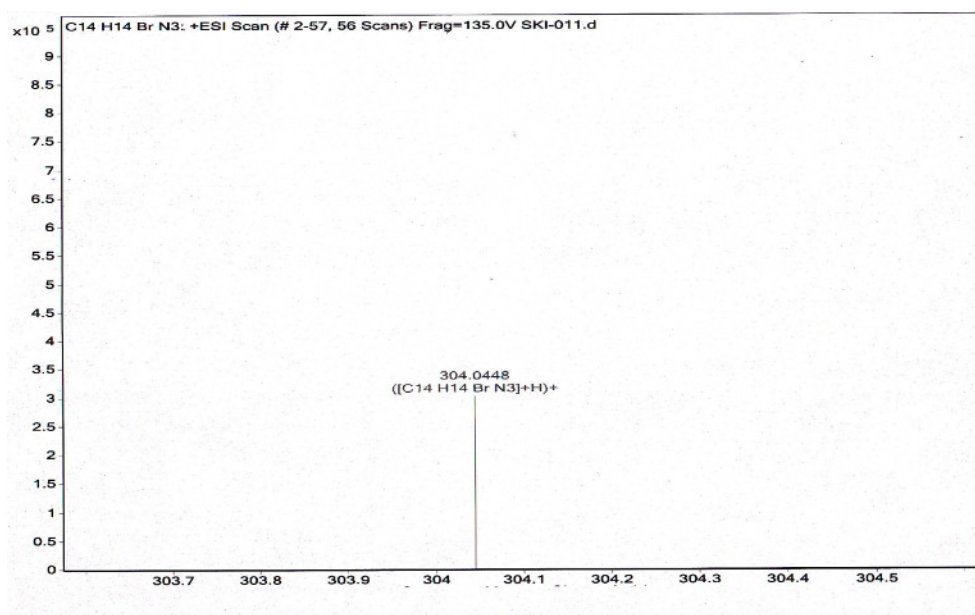

<sup>1</sup>H NMR

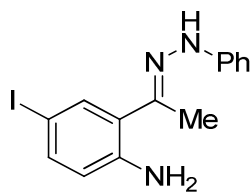

**(E)-4-Iodo-2-(1-(2-phenylhydrazono)ethyl)aniline (1h)**

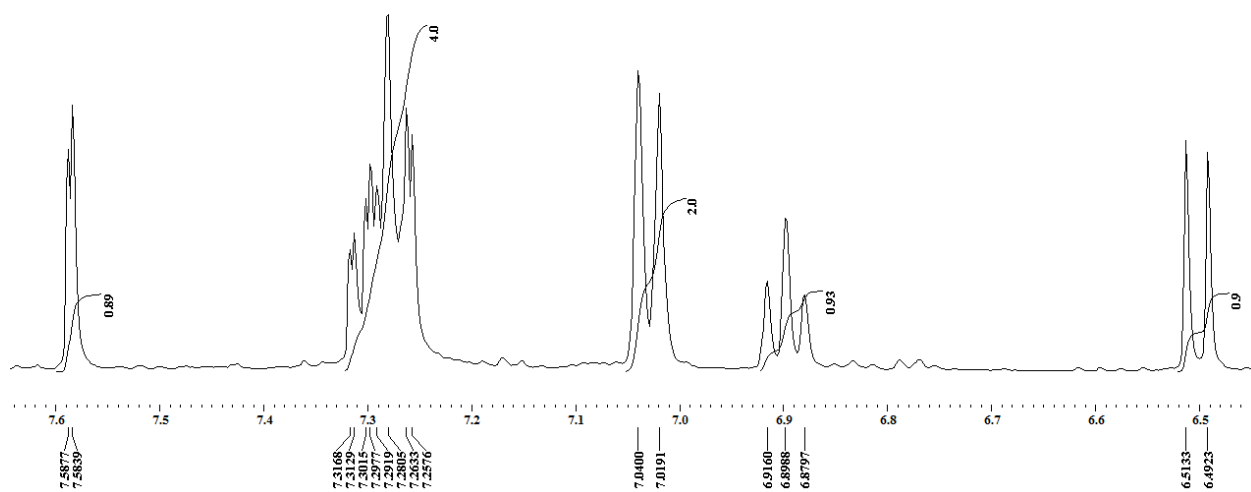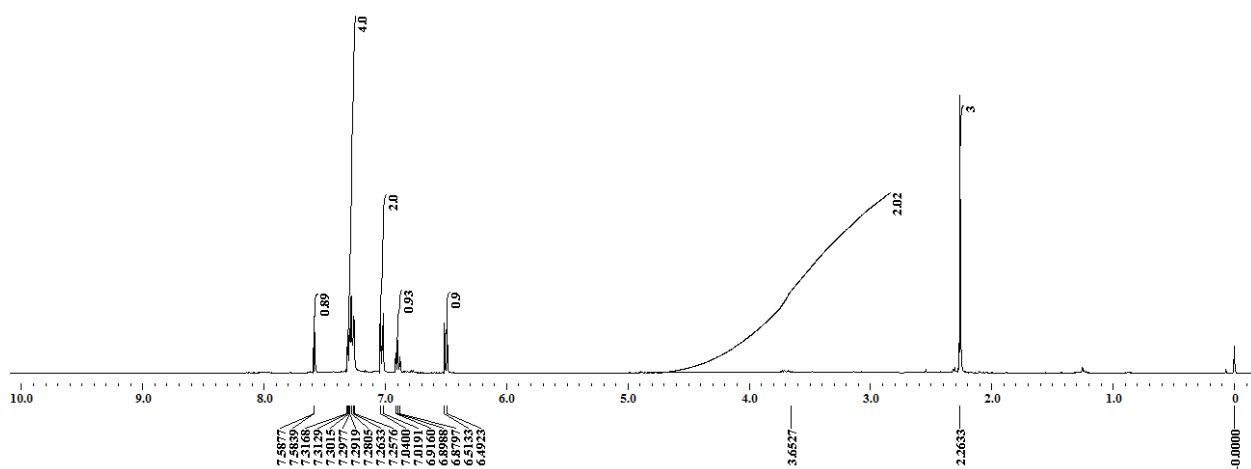

<sup>13</sup>C NMR

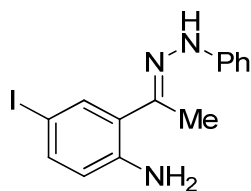

**(*E*)-4-Iodo-2-(1-(2-phenylhydrazono)ethyl)aniline (1h)**

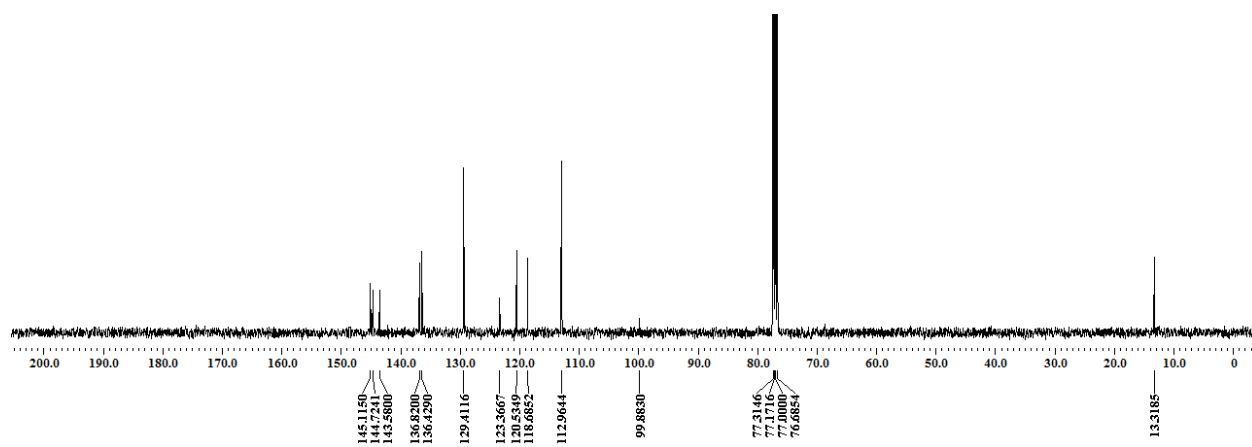

# HRMS

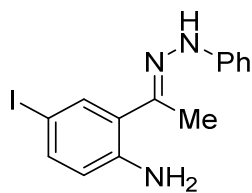

**(*E*)-4-Iodo-2-(1-(2-phenylhydrazono)ethyl)aniline (1h)**

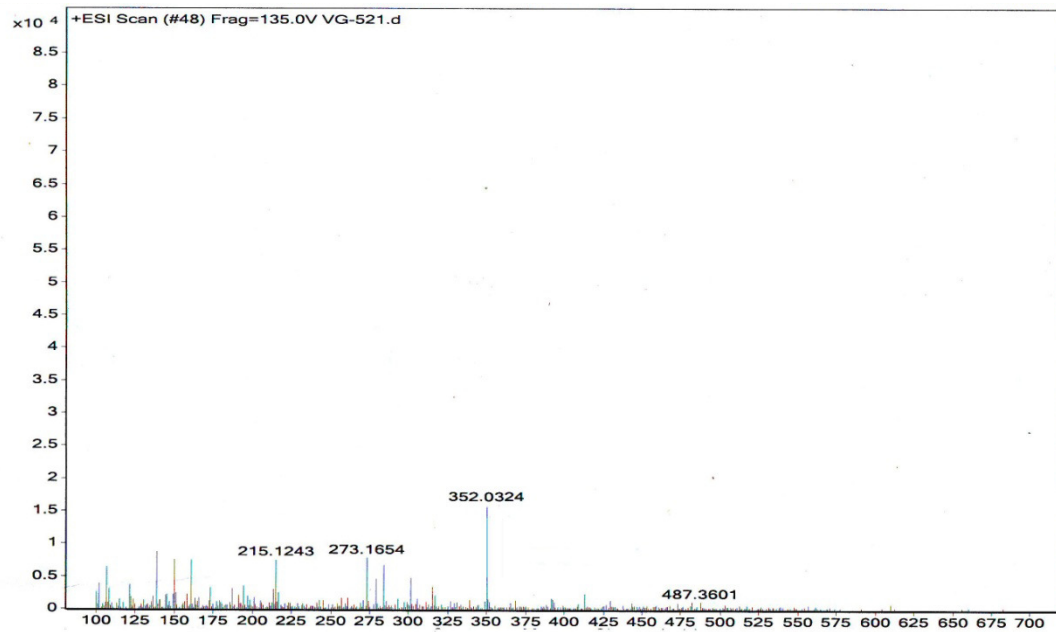

<sup>1</sup>H NMR

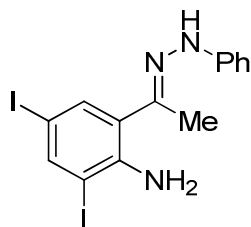

**(*E*)-2,4-Diiodo-6-(1-(2-phenylhydrazono)ethyl)aniline (1i)**

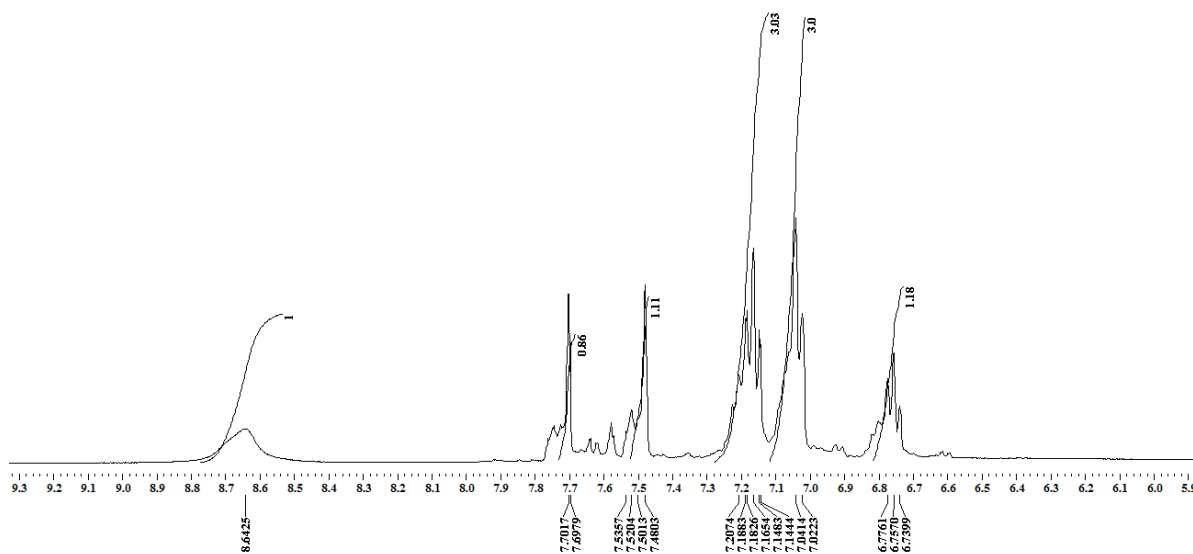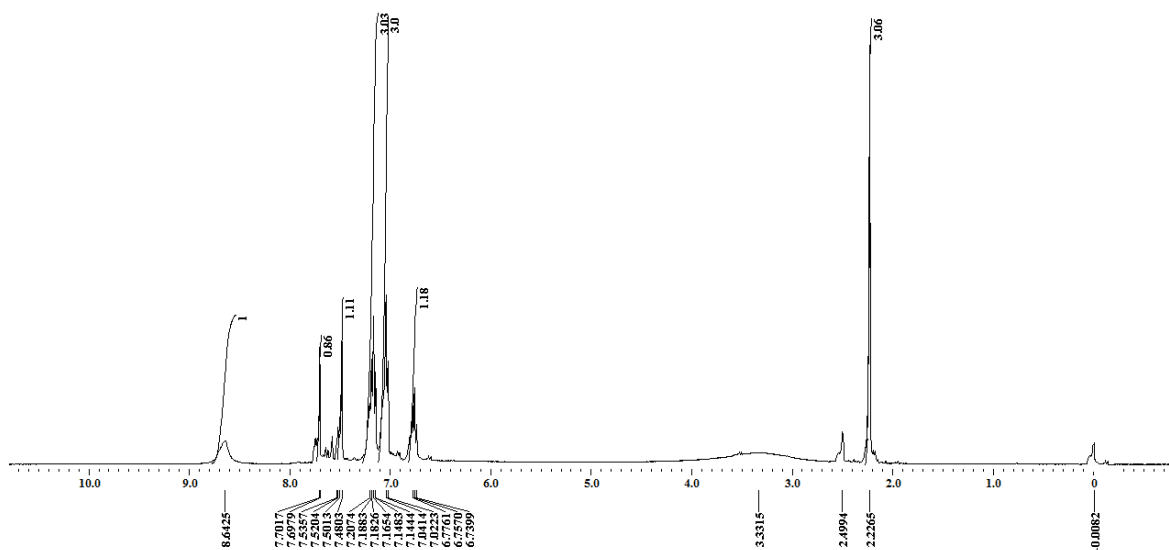

<sup>13</sup>C NMR



**(*E*)-2,4-Diiodo-6-(1-(2-phenylhydrazono)ethyl)aniline (1i)**

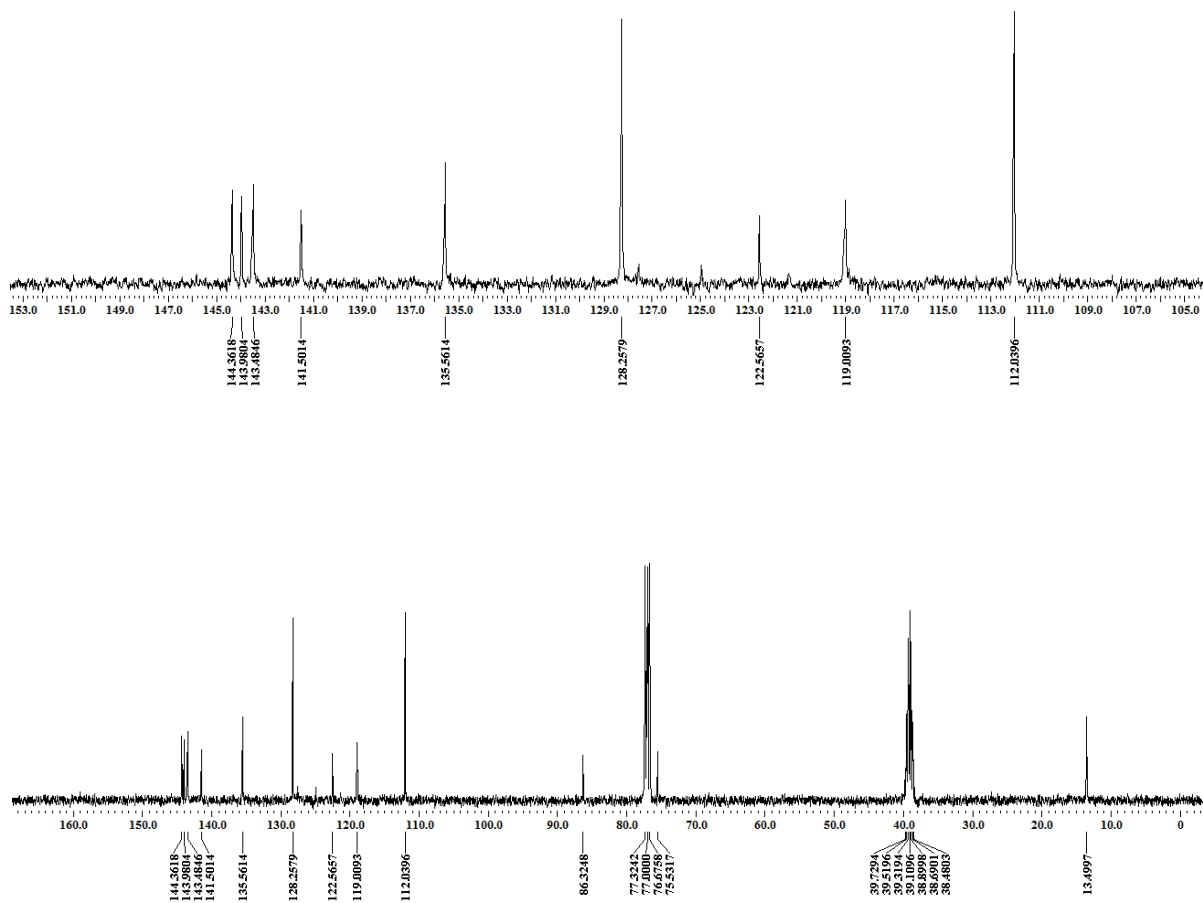

## HRMS

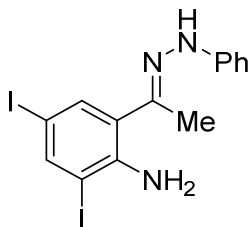

**(*E*)-2,4-Diiodo-6-(1-(2-phenylhydrazono)ethyl)aniline (1i)**

MFE MS Spectrum

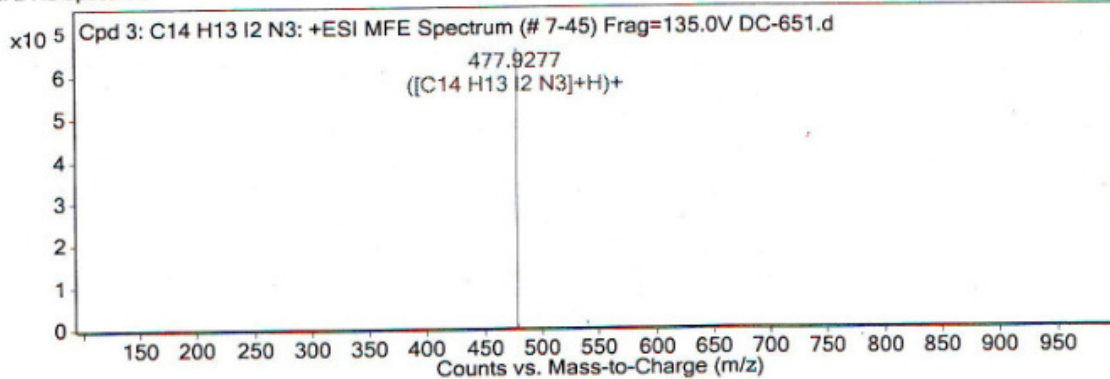

MFE MS Zoomed Spectrum

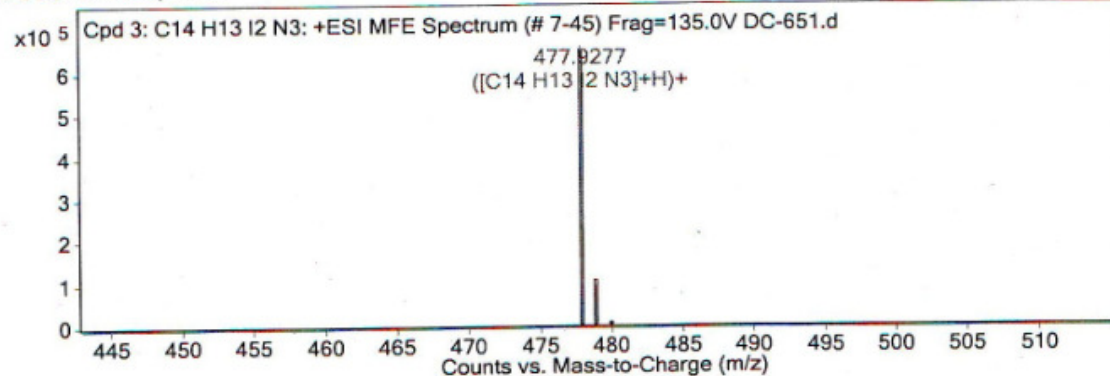



<sup>1</sup>H NMR

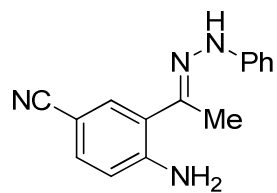

**(*E*)-4-Amino-3-(1-(2-phenylhydrazono)ethyl)benzonitrile (1j)**

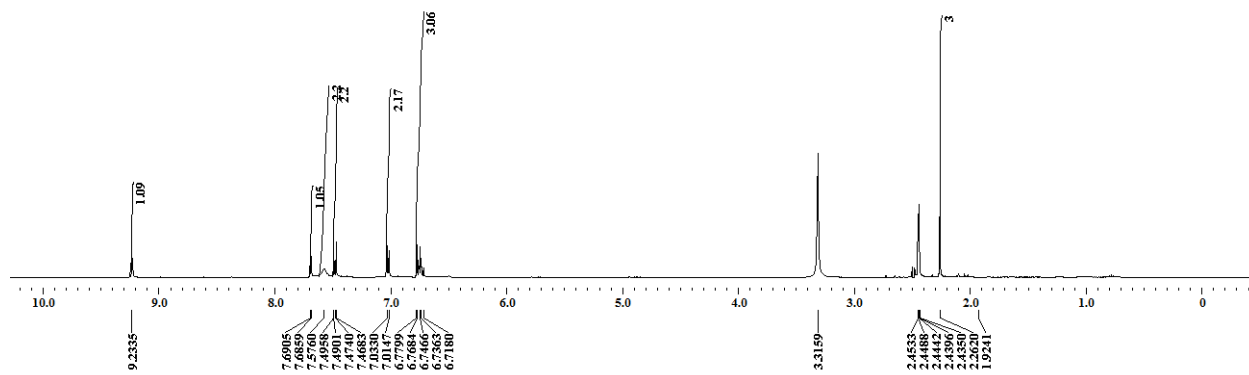

<sup>13</sup>C NMR

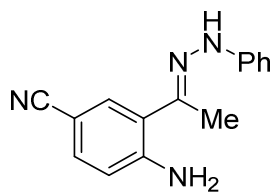

**(*E*)-4-Amino-3-(1-(2-phenylhydrazono)ethyl)benzonitrile (1j)**

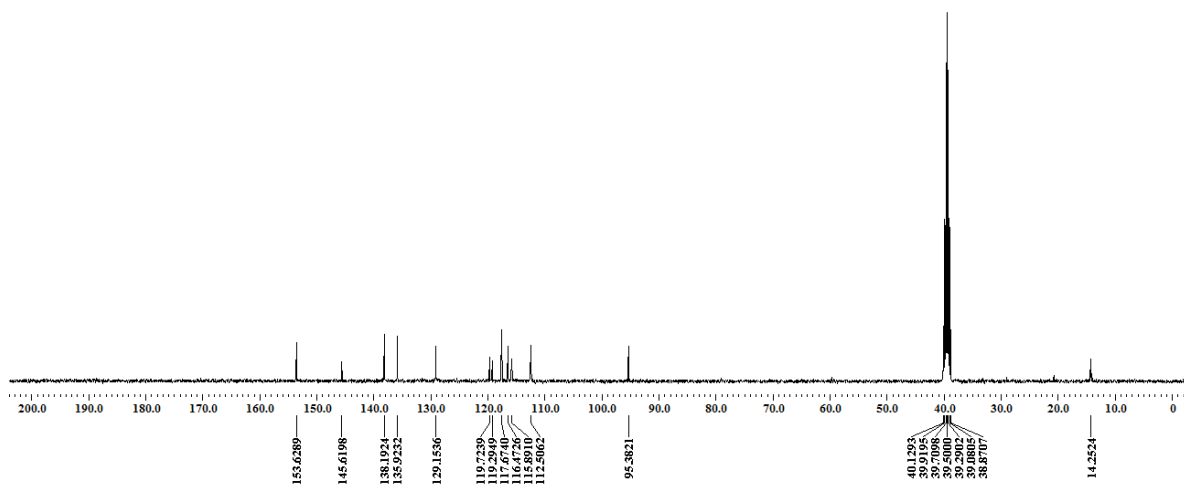

## HRMS

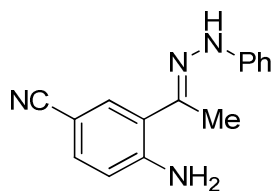

**(*E*)-4-Amino-3-(1-(2-phenylhydrazono)ethyl)benzonitrile (1j)**

MFE MS Spectrum

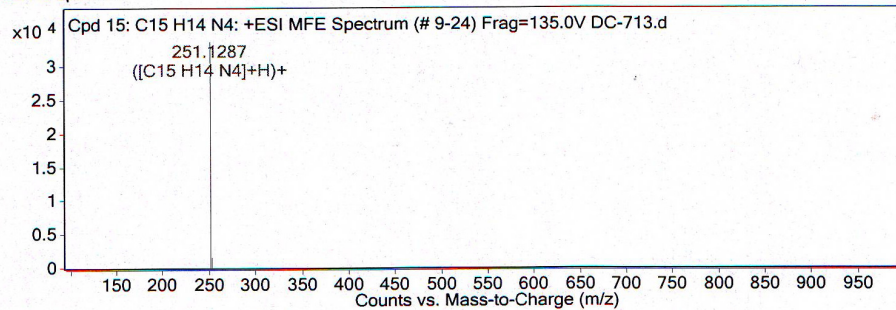

MFE MS Zoomed Spectrum

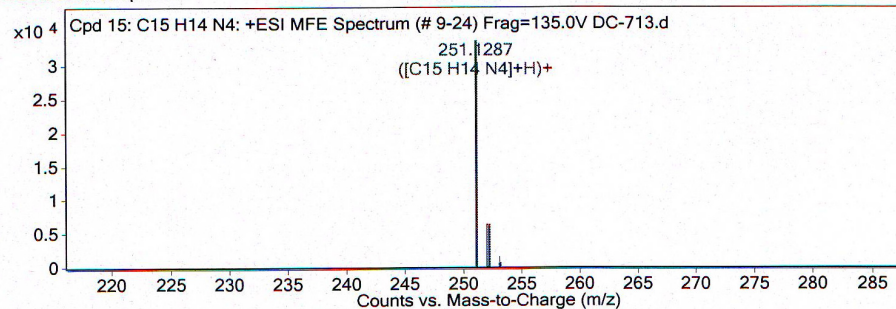

<sup>1</sup>H NMR

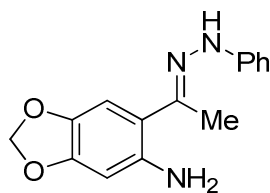

**(*E*)-6-(1-(2-Phenylhydrazono)ethyl)benzo[*d*][1,3]dioxol-5-amine (1k)**

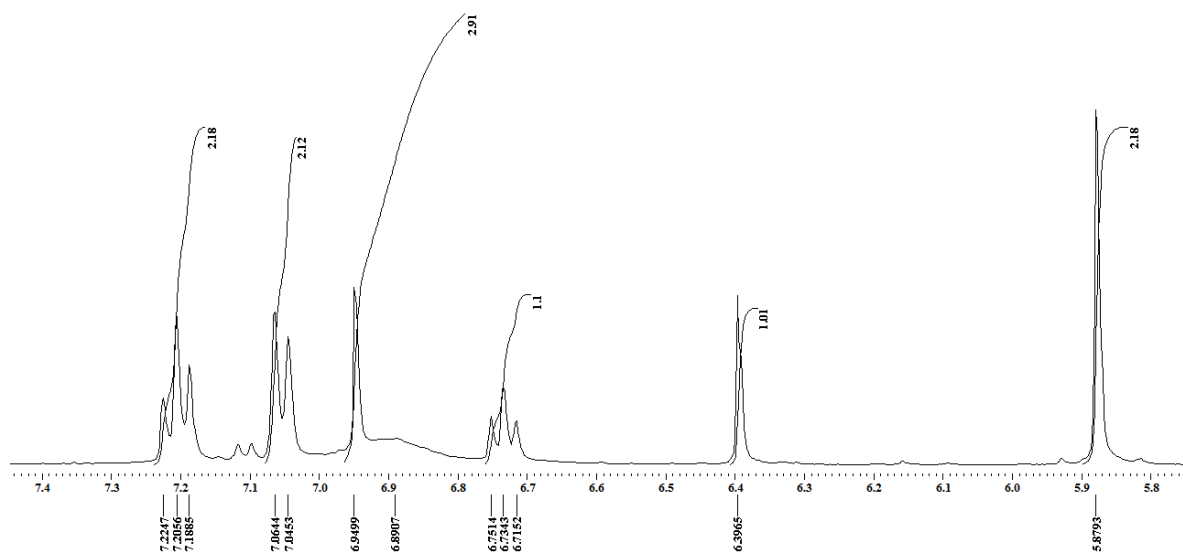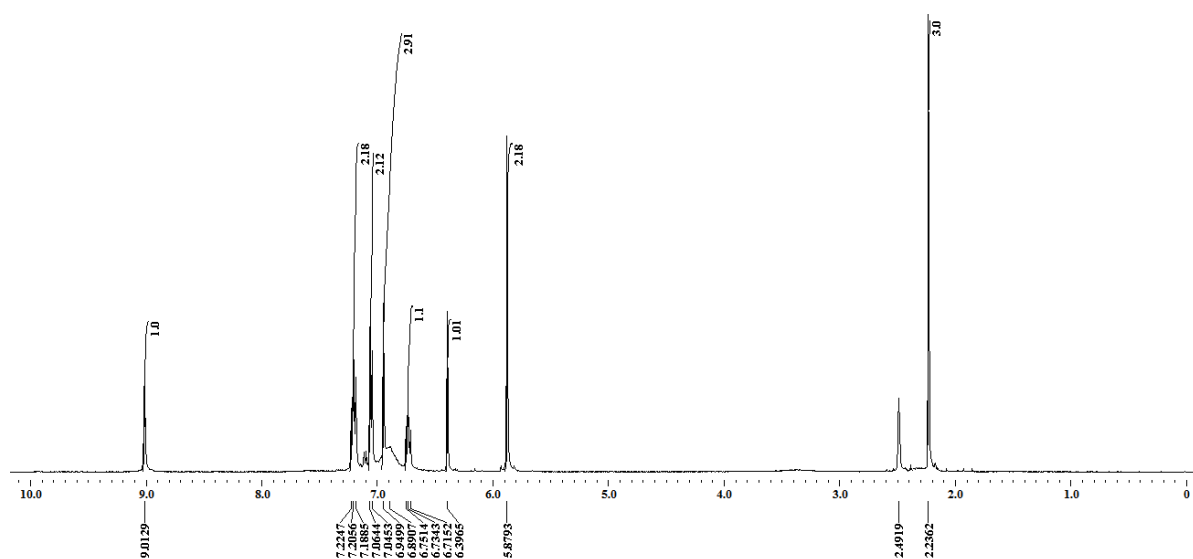

<sup>13</sup>C-NMR

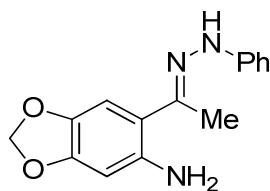

**(*E*)-6-(1-(2-Phenylhydrazono)ethyl)benzo[*d*][1,3]dioxol-5-amine (1k)**

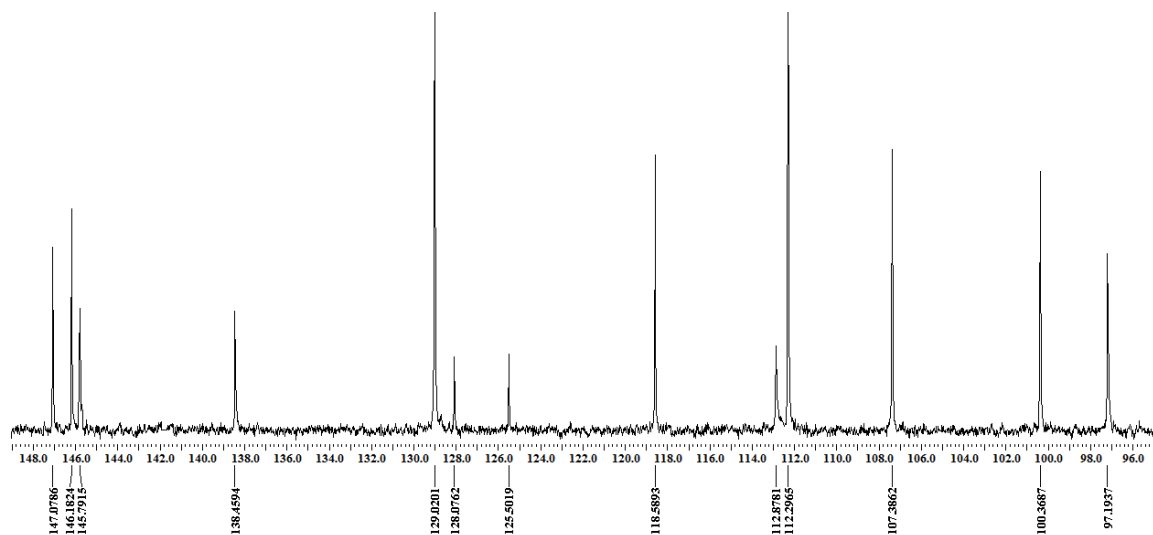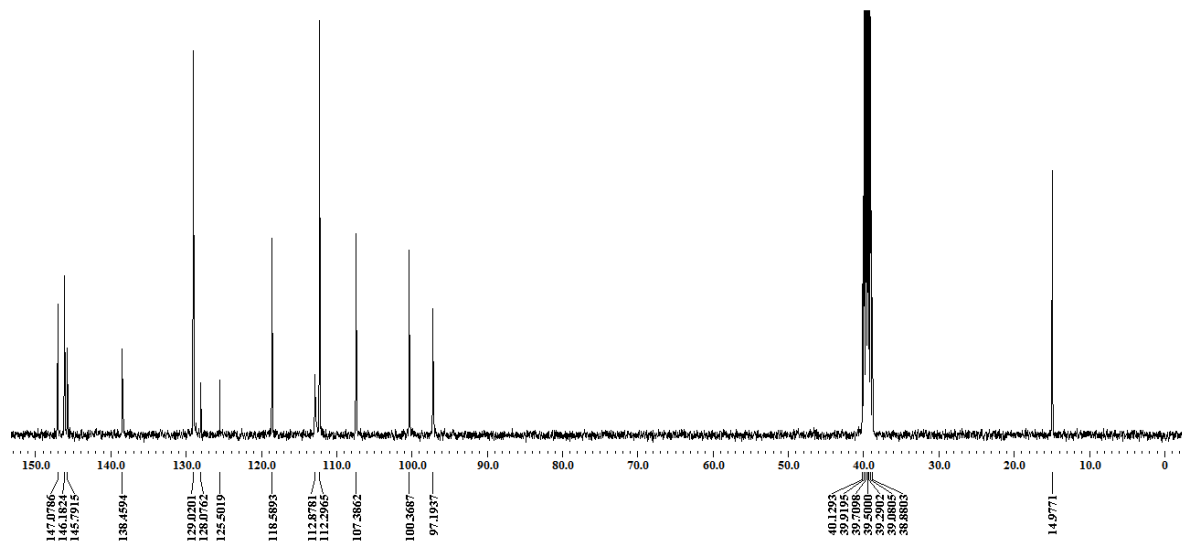

# HRMS

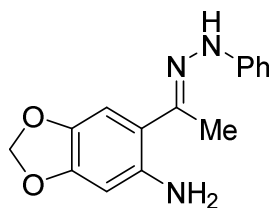

**(E)-6-(1-(2-Phenylhydrazono)ethyl)benzo[d][1,3]dioxol-5-amine (1k)**

MFE MS Spectrum

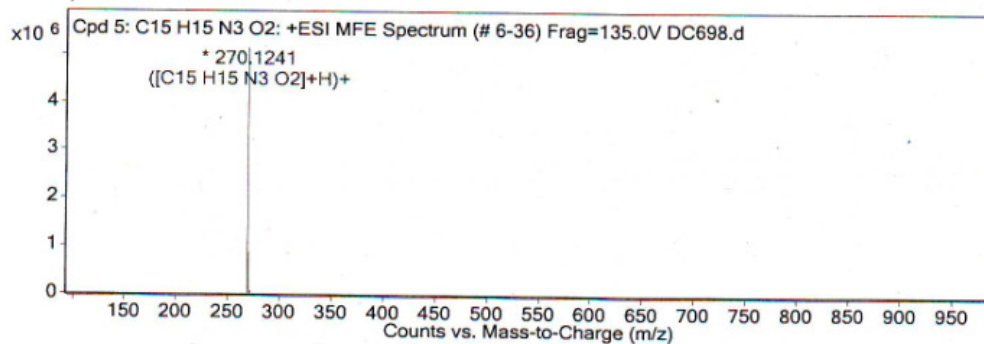

MFE MS Zoomed Spectrum

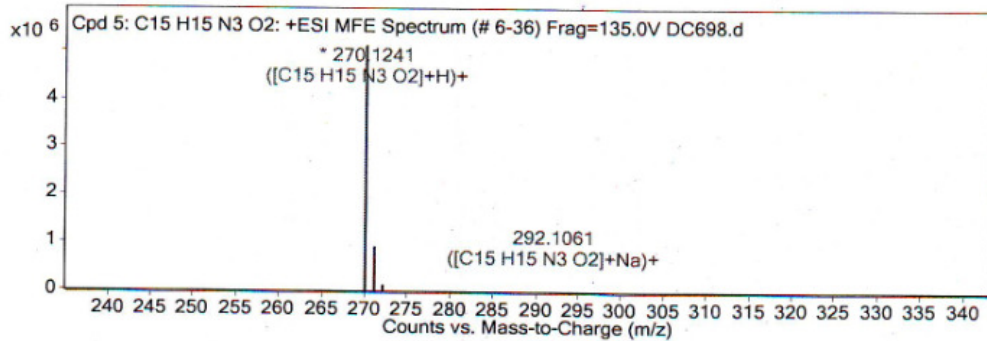

# <sup>1</sup>H NMR

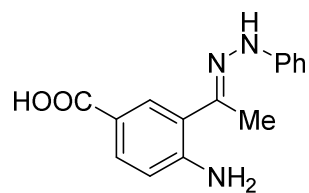

**(E)-4-Amino-3-(1-(2-phenylhydrazono)ethyl)benzoic acid (11)**

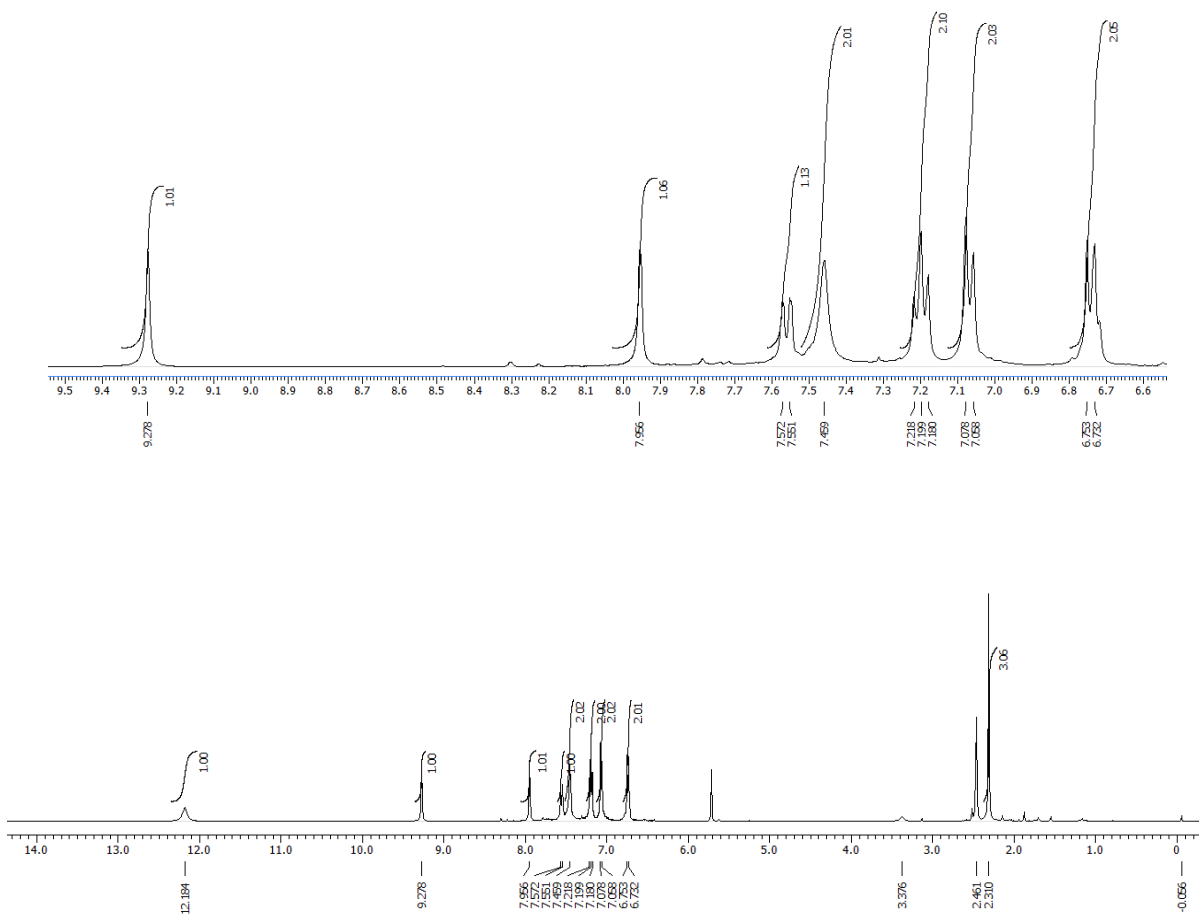

<sup>13</sup>C NMR

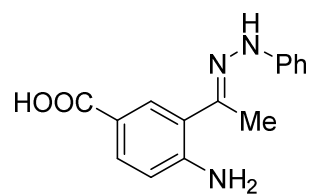

**(*E*)-4-Amino-3-(1-(2-phenylhydrazono)ethyl)benzoic acid (11)**

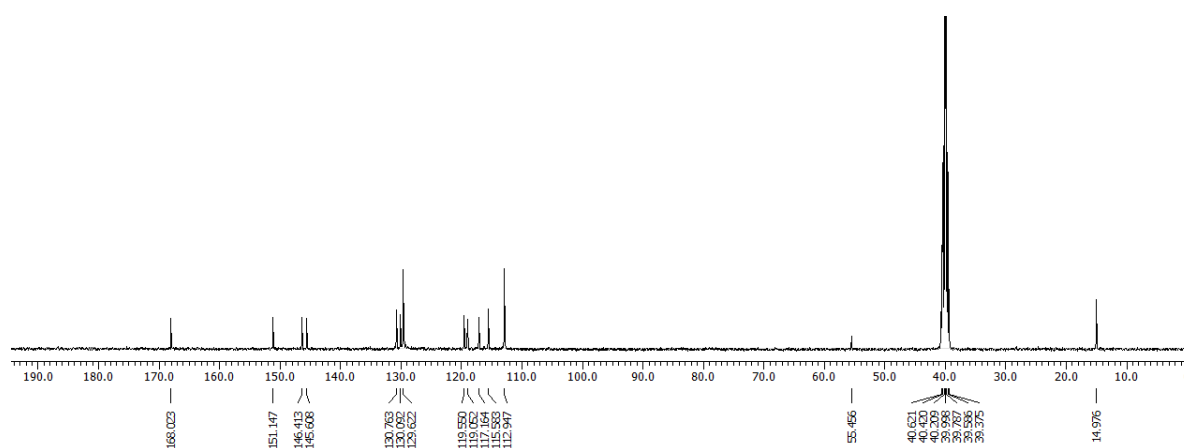



# HRMS

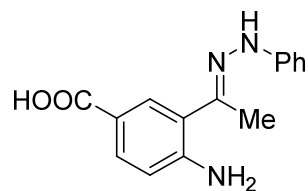

**(*E*)-4-Amino-3-(1-(2-phenylhydrazono)ethyl)benzoic acid (11)**

| Sample Name   | VG-PB-14   | Position    | P1-A5     | Instrument Name | Instrument 1 | User Name              |                     |
|---------------|------------|-------------|-----------|-----------------|--------------|------------------------|---------------------|
| Inj Vol       | 0.5        | InjPosition |           | SampleType      | Sample       | IRM Calibration Status | Success             |
| Data Filename | VG-PB-13.d | ACQ Method  | Damo JK.m | Comment         |              | Acquired Time          | 06-06-2019 14:57:34 |

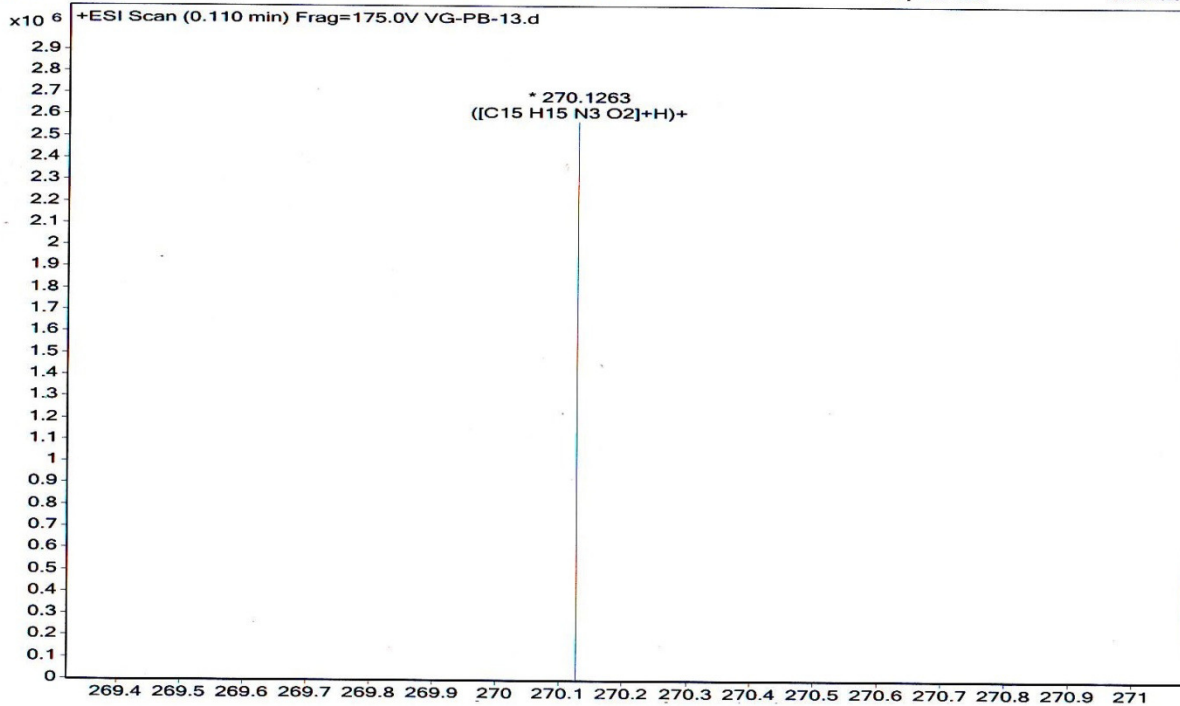

<sup>1</sup>H NMR

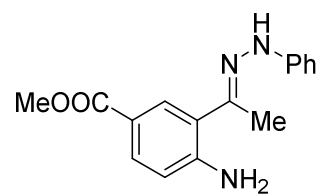

Methyl (*E*)-4-amino-3-(1-(2-phenylhydrazono)ethyl)benzoate (1m)

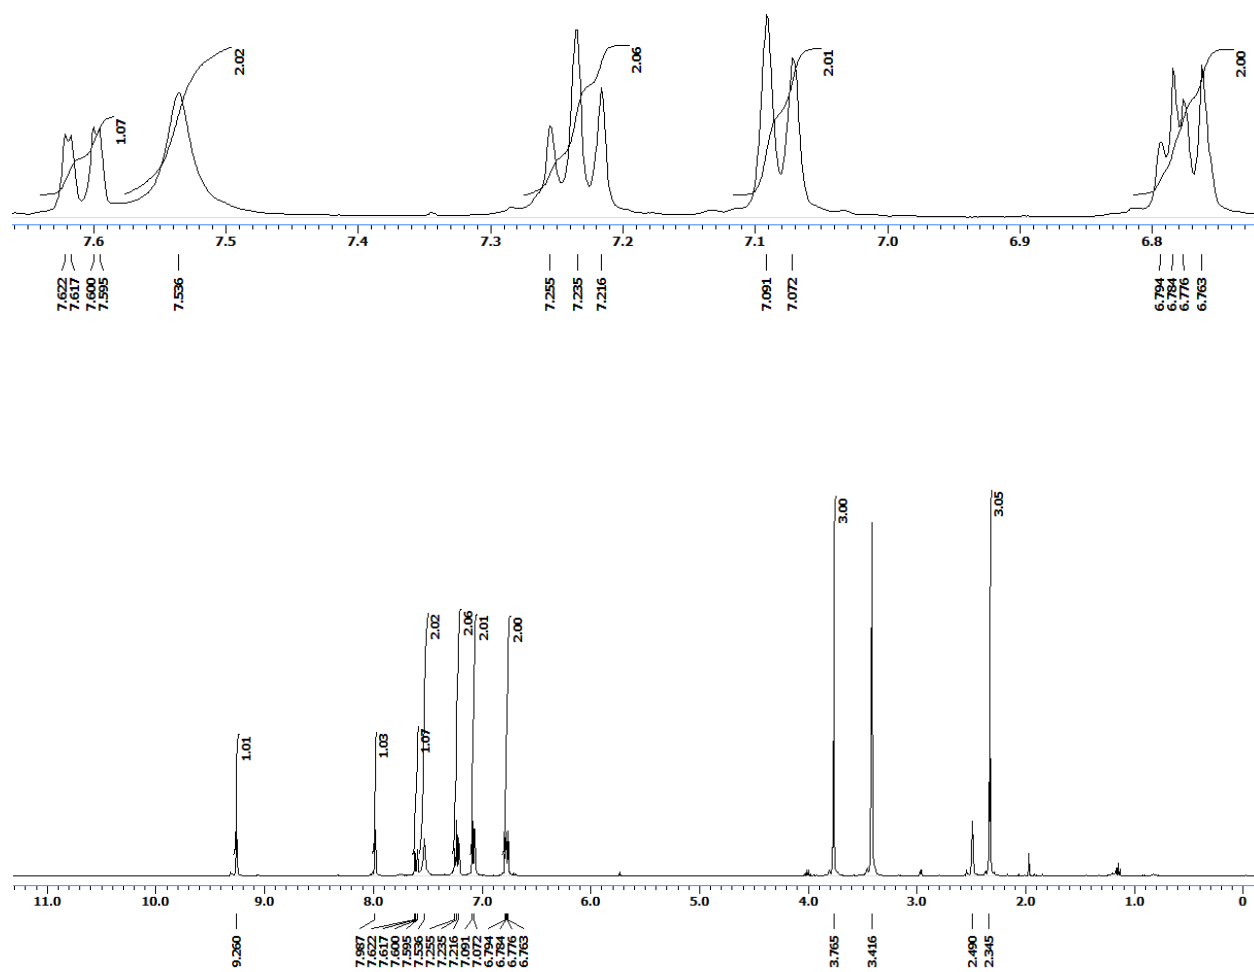

<sup>13</sup>C NMR

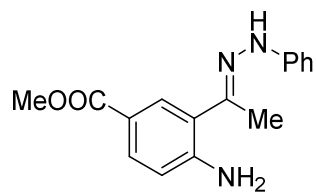

Methyl (*E*)-4-amino-3-(1-(2-phenylhydrazono)ethyl)benzoate (1m)

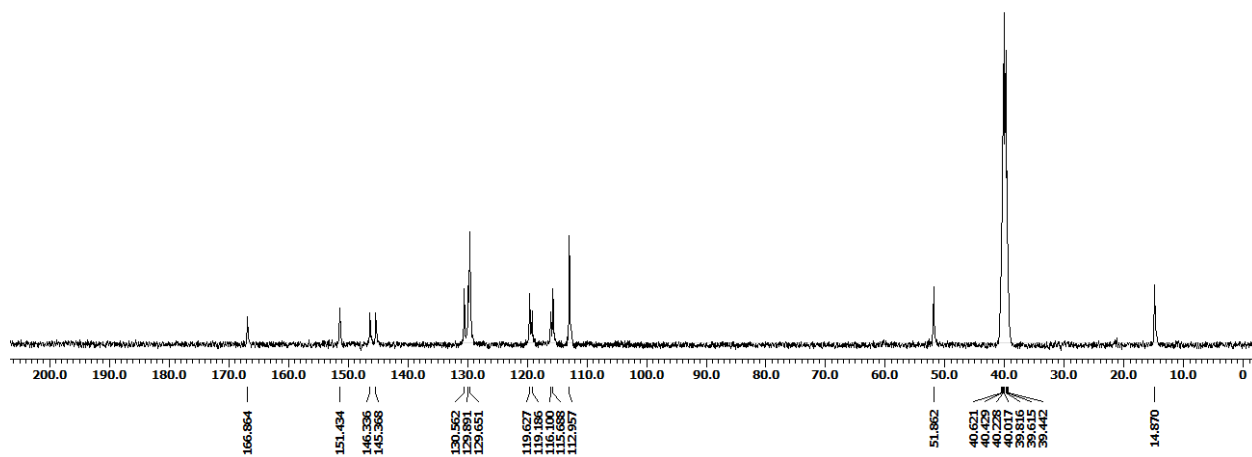

# HRMS

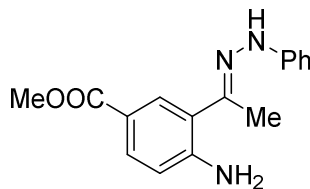

## Methyl (E)-4-amino-3-(1-(2-phenylhydrazono)ethyl)benzoate (1m)

### Qualitative Compound Report

|                        |              |               |                     |
|------------------------|--------------|---------------|---------------------|
| Data File              | VG-PB-20.d   | Sample Name   | VG-PB-20            |
| Sample Type            | Sample       | Position      | P1-D9               |
| Instrument Name        | Instrument 1 | User Name     |                     |
| Acq Method             | Damo JK.m    | Acquired Time | 07-06-2019 14:44:18 |
| IRM Calibration Status | Success      | DA Method     | Default.m           |
| Comment                |              |               |                     |

|                |                             |
|----------------|-----------------------------|
| Sample Group   | Info.                       |
| Acquisition SW | 6200 series TOF/6500 series |
| Version        | Q-TOF B.05.01 (B5125.1)     |

| Compound Label        | RT    | Mass     | Formula       | MFG Formula   | MFG Diff (ppm) | DB Formula    |
|-----------------------|-------|----------|---------------|---------------|----------------|---------------|
| Cpd 15: C16 H17 N3 O2 | 0.122 | 283.1325 | C16 H17 N3 O2 | C16 H17 N3 O2 | -1.45          | C16 H17 N3 O2 |

| Compound Label        | m/z      | RT    | Algorithm                 | Mass     |
|-----------------------|----------|-------|---------------------------|----------|
| Cpd 15: C16 H17 N3 O2 | 284.1399 | 0.122 | Find by Molecular Feature | 283.1325 |

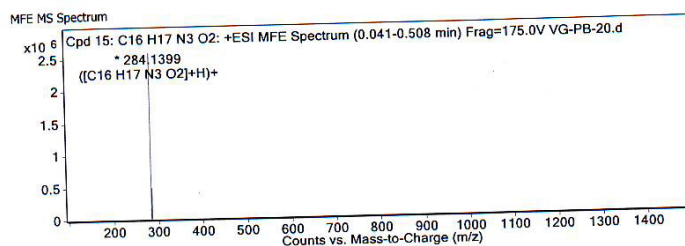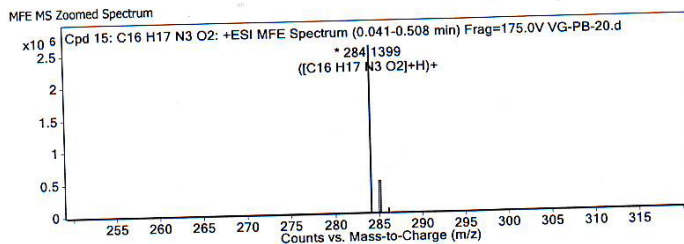

| m/z      | z | Abund      | Formula       | Ion    |
|----------|---|------------|---------------|--------|
| 284.1399 | 1 | 2586843.25 | C16 H17 N3 O2 | (M+H)+ |
| 285.1416 | 1 | 490169.38  | C16 H17 N3 O2 | (M+H)+ |
| 286.1473 | 1 | 46483.25   | C16 H17 N3 O2 | (M+H)+ |

<sup>1</sup>H NMR

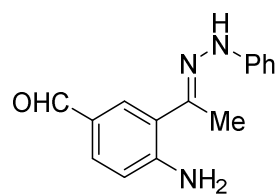

**(*E*)-4-Amino-3-(1-(2-phenylhydrazono)ethyl)benzaldehyde (1n)**

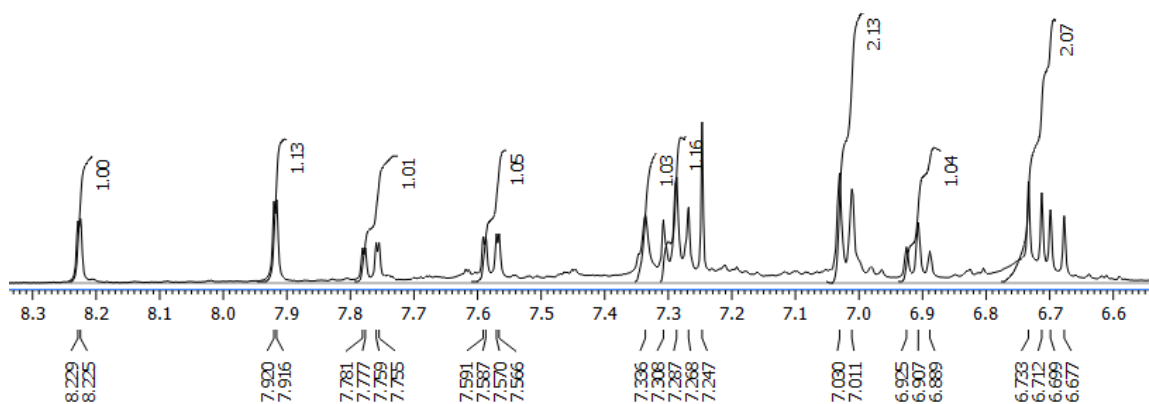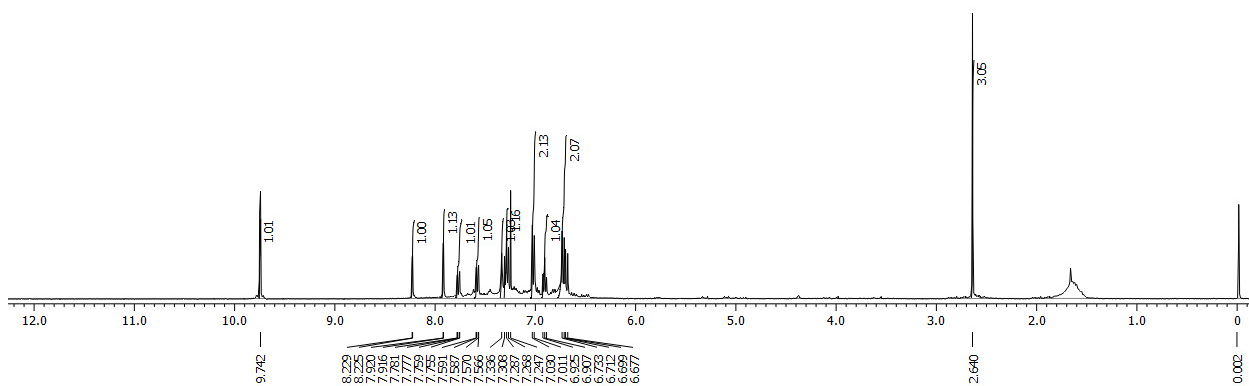

<sup>13</sup>C NMR



**(*E*)-4-Amino-3-(1-(2-phenylhydrazono)ethyl)benzaldehyde (1n)**

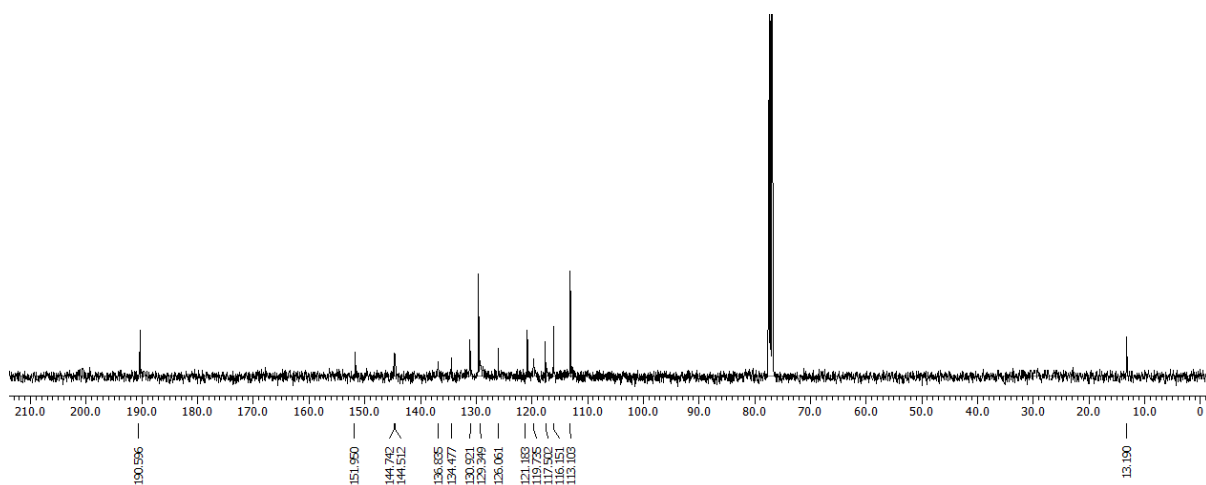

# HRMS

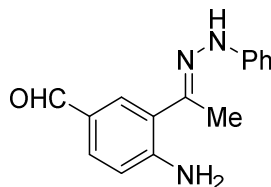

## (E)-4-Amino-3-(1-(2-phenylhydrazono)ethyl)benzaldehyde (1n)

### Qualitative Compound Report

|                               |              |                      |                     |
|-------------------------------|--------------|----------------------|---------------------|
| <b>Data File</b>              | VG-CHO.d     | <b>Sample Name</b>   | VG-CHO              |
| <b>Sample Type</b>            | Sample       | <b>Position</b>      | P1-B9               |
| <b>Instrument Name</b>        | Instrument 1 | <b>User Name</b>     |                     |
| <b>Acq Method</b>             | Damo JK.m    | <b>Acquired Time</b> | 01-07-2019 16:52:57 |
| <b>IRM Calibration Status</b> | Success      | <b>DA Method</b>     | Default.m           |
| <b>Comment</b>                |              |                      |                     |

|                       |                             |              |
|-----------------------|-----------------------------|--------------|
| <b>Sample Group</b>   |                             | <b>Info.</b> |
| <b>Acquisition SW</b> | 6200 series TOF/6500 series |              |
| <b>Version</b>        | Q-TOF B.05.01 (B5125.1)     |              |

#### Compound Table

| Compound Label      | RT   | Mass     | Formula      | MFG Formula  | MFG Diff (ppm) | DB Formula   |
|---------------------|------|----------|--------------|--------------|----------------|--------------|
| Cpd 4: C15 H15 N3 O | 0.13 | 253.1232 | C15 H15 N3 O | C15 H15 N3 O | -6.72          | C15 H15 N3 O |

| Compound Label      | m/z      | RT   | Algorithm                 | Mass     |
|---------------------|----------|------|---------------------------|----------|
| Cpd 4: C15 H15 N3 O | 254.1305 | 0.13 | Find by Molecular Feature | 253.1232 |

#### MFE MS Spectrum

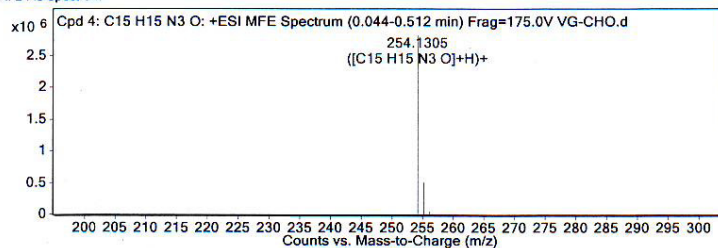

#### MFE MS Zoomed Spectrum

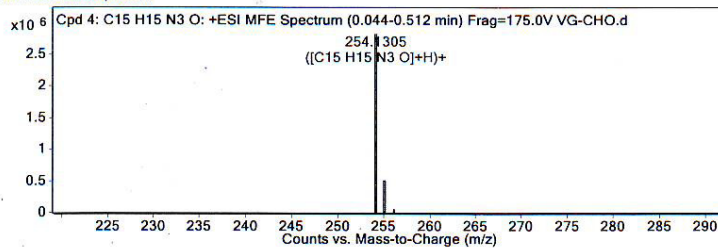

#### MS Spectrum Peak List

| m/z      | z | Abund     | Formula      | Ion    |
|----------|---|-----------|--------------|--------|
| 254.1305 | 1 | 2815784   | C15 H15 N3 O | (M+H)+ |
| 255.1335 | 1 | 508142.32 | C15 H15 N3 O | (M+H)+ |
| 256.1361 | 1 | 44617.81  | C15 H15 N3 O | (M+H)+ |
| 257.1429 | 1 | 2445.91   | C15 H15 N3 O | (M+H)+ |

--- End Of Report ---

<sup>1</sup>H NMR

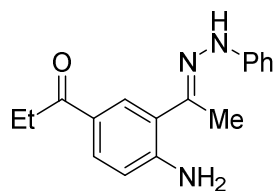

**(*E*)-1-(4-Amino-3-(1-(2-phenylhydrazono)ethyl)phenyl)propan-1-one (1o)**

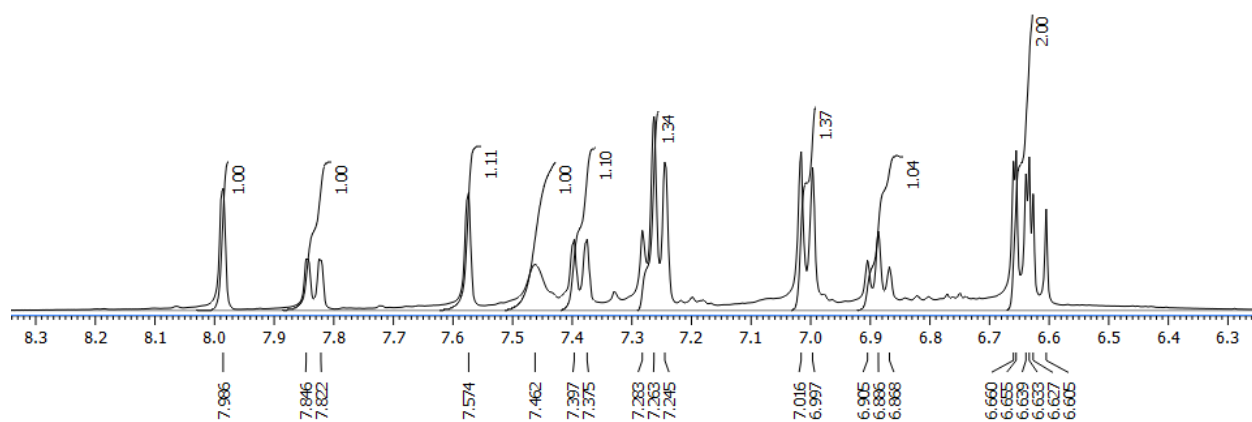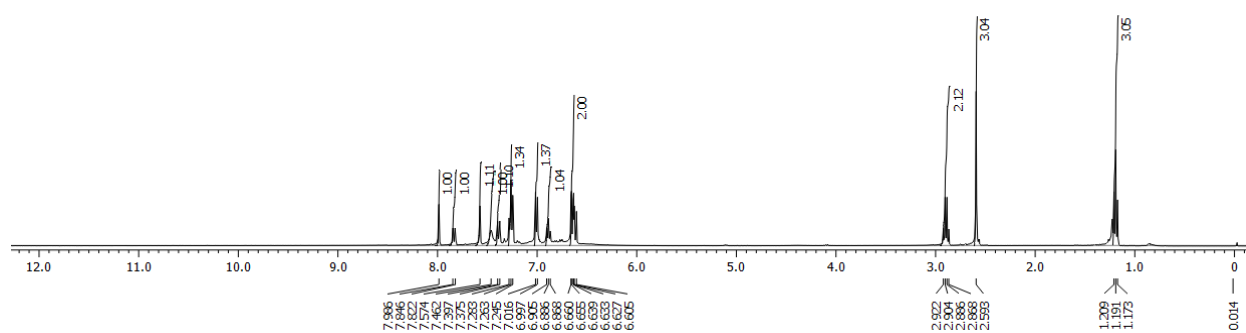



<sup>13</sup>C NMR



**(*E*)-1-(4-Amino-3-(1-(2-phenylhydrazono)ethyl)phenyl)propan-1-one (1o)**

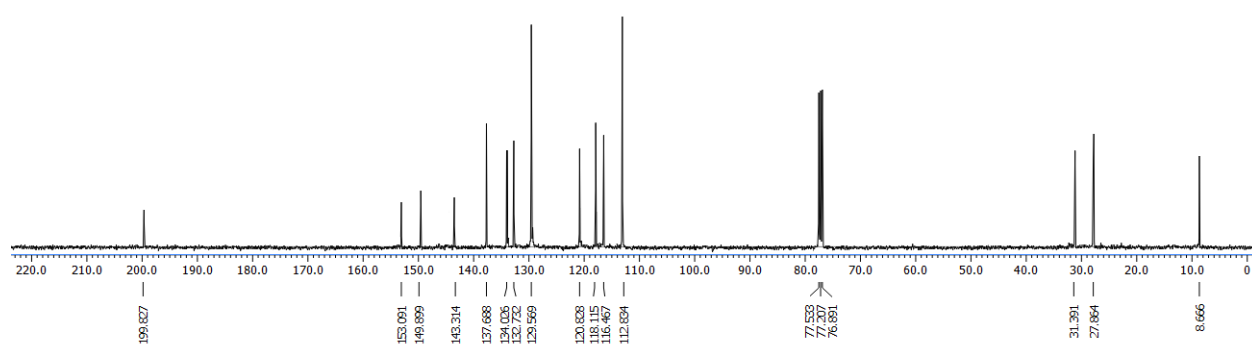

# HRMS

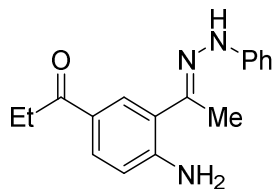

**(E)-1-(4-Amino-3-(1-(2-phenylhydrazono)ethyl)phenyl)propan-1-one (1o)**

## Qualitative Compound Report

Data File: VG-PBCOET.d  
Sample Type: Sample  
Instrument Name: Instrument 1  
Acq Method: Demo J.K.m.  
IRM Calibration Status: Success  
Comment:   
Sample Name: VG-PBCOET  
Position: P1-A8  
User Name:   
Acquired Time: 04-07-2019 12:35:52  
DA Method: Default.m

Sample Group:   
Acquisition SW: 6200 series TOF/6500 series  
Version: Q-TOF 8.05.01 (85125.1)

### Compound Table

| Compound Label      | RT    | Mass     | Formula      | MFG Formula  | MFG Diff (ppm) | DB Formula   |
|---------------------|-------|----------|--------------|--------------|----------------|--------------|
| Cpd 1: C17 H19 N3 O | 0.098 | 281.1535 | C17 H19 N3 O | C17 H19 N3 O | -2.62          | C17 H19 N3 O |

| Compound Label      | m/z      | RT    | Algorithm                 | Mass     |
|---------------------|----------|-------|---------------------------|----------|
| Cpd 1: C17 H19 N3 O | 282.1609 | 0.098 | Find by Molecular Feature | 281.1535 |

### MFE MS Spectrum

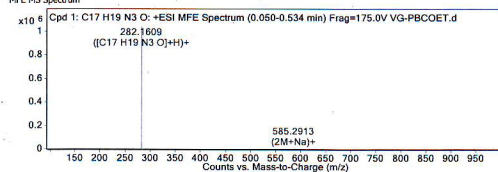

### MFE MS Zoomed Spectrum

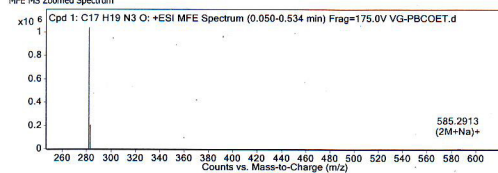

### MS Spectrum Peak List

| m/z      | z | Abund      | Formula      | Ion      |
|----------|---|------------|--------------|----------|
| 282.1609 | 1 | 1036121.75 | C17 H19 N3 O | (M+H)+   |
| 283.1634 | 1 | 197451.43  | C17 H19 N3 O | (M+H)+   |
| 585.2913 | 1 | 7816.82    |              | (2M+Na)+ |
| 586.2961 | 1 | 4923.52    |              | (2M+Na)+ |
| 587.2717 | 1 | 4678.01    |              | (2M+Na)+ |

**$^1\text{H}$  NMR**

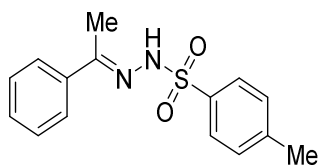

**(*E*)-4-Methyl-*N'*-(1-phenylethylidene)benzenesulfonohydrazide (1p)**

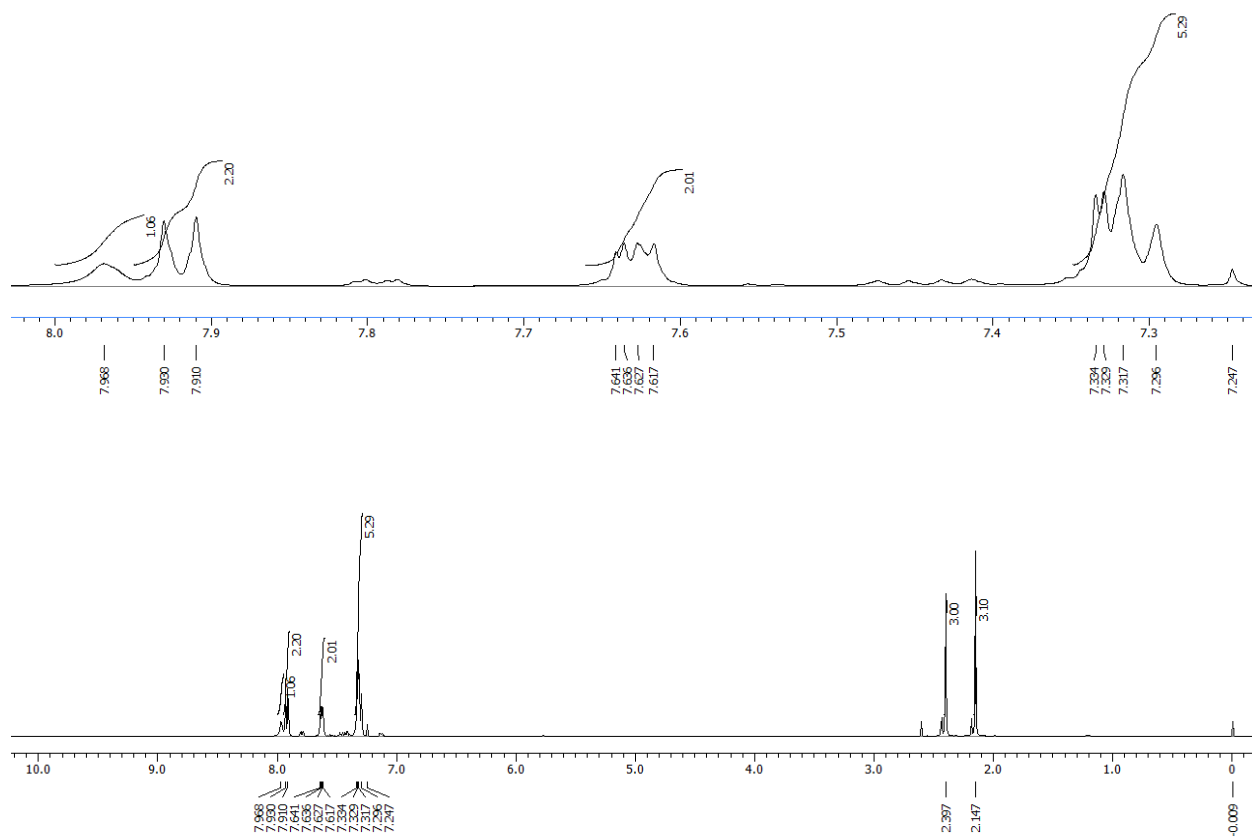

<sup>13</sup>C NMR

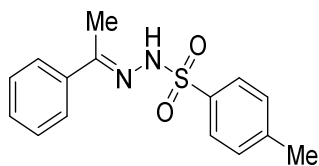

**(*E*)-4-Methyl-*N'*-(1-phenylethylidene)benzenesulfonohydrazide (1p)**

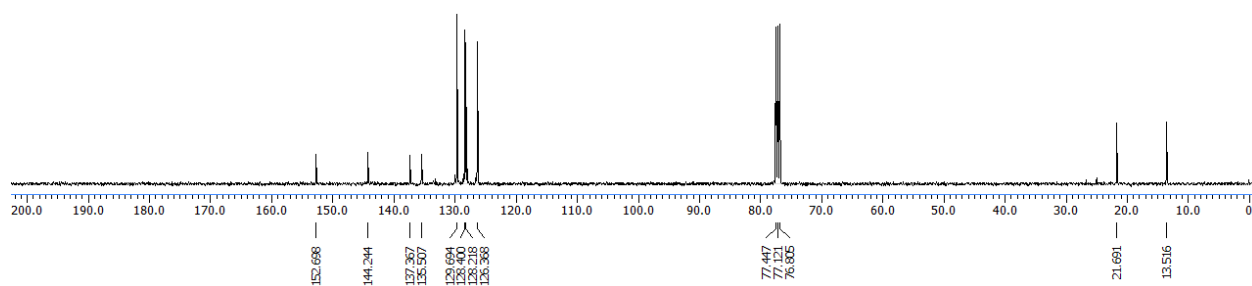

**HRMS**

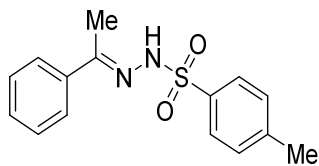

**(*E*)-4-Methyl-*N'*-(1-phenylethylidene)benzenesulfonohydrazide (1p)**

|                               |              |                      |                     |
|-------------------------------|--------------|----------------------|---------------------|
| <b>Data File</b>              | VG-PB-508.d  | <b>Sample Name</b>   | VG-PB-508           |
| <b>Sample Type</b>            | Sample       | <b>Position</b>      | P1-C8               |
| <b>Instrument Name</b>        | Instrument 1 | <b>User Name</b>     |                     |
| <b>Acq Method</b>             | Damo JK.m    | <b>Acquired Time</b> | 10-07-2019 11:52:06 |
| <b>IRM Calibration Status</b> | Success      | <b>DA Method</b>     | Default.m           |
| <b>Comment</b>                |              |                      |                     |

|                       |                             |              |
|-----------------------|-----------------------------|--------------|
| <b>Sample Group</b>   |                             | <b>Info.</b> |
| <b>Acquisition SW</b> | 6200 series TOF/6500 series |              |
| <b>Version</b>        | Q-TOF B.05.01 (B5125.1)     |              |

#### Compound Table

| Compound Label         | RT    | Mass     | Formula         | MFG Formula     | MFG Diff (ppm) | DB Formula      |
|------------------------|-------|----------|-----------------|-----------------|----------------|-----------------|
| Cpd 1: C15 H16 N2 O2 S | 0.161 | 288.0957 | C15 H16 N2 O2 S | C15 H16 N2 O2 S | -8.37          | C15 H16 N2 O2 S |

| Compound Label         | m/z      | RT    | Algorithm                 | Mass     |
|------------------------|----------|-------|---------------------------|----------|
| Cpd 1: C15 H16 N2 O2 S | 289.1029 | 0.161 | Find by Molecular Feature | 288.0957 |

#### MFE MS Spectrum

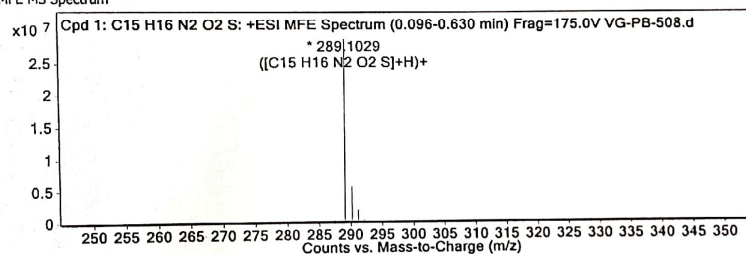

#### MFE MS Zoomed Spectrum

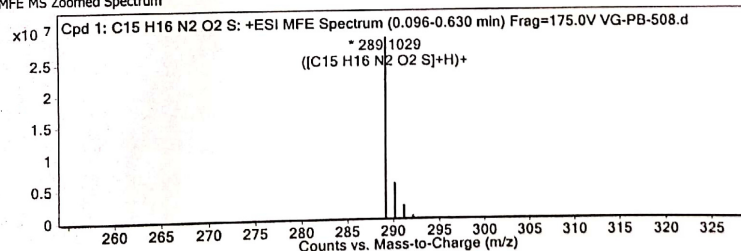

#### MS Spectrum Peak List

| m/z      | z | Abund      | Formula         | Ion    |
|----------|---|------------|-----------------|--------|
| 289.1029 | 1 | 28793964   | C15 H16 N2 O2 S | (M+H)+ |
| 290.106  | 1 | 5706625.51 | C15 H16 N2 O2 S | (M+H)+ |
| 291.1021 | 1 | 1891118.38 | C15 H16 N2 O2 S | (M+H)+ |
| 292.1038 | 1 | 283749.17  | C15 H16 N2 O2 S | (M+H)+ |
| 293.111  | 1 | 36257      | C15 H16 N2 O2 S | (M+H)+ |
| 294.112  | 1 | 1854.92    | C15 H16 N2 O2 S | (M+H)+ |

--- End Of Report ---

#### <sup>1</sup>H NMR

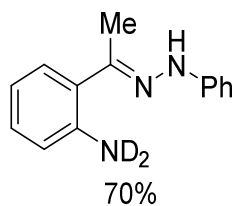

**(E)-2-(1-(2-Phenylhydrazono)ethyl)aniline-*d*<sub>2</sub> (1a-ND<sub>2</sub>)**

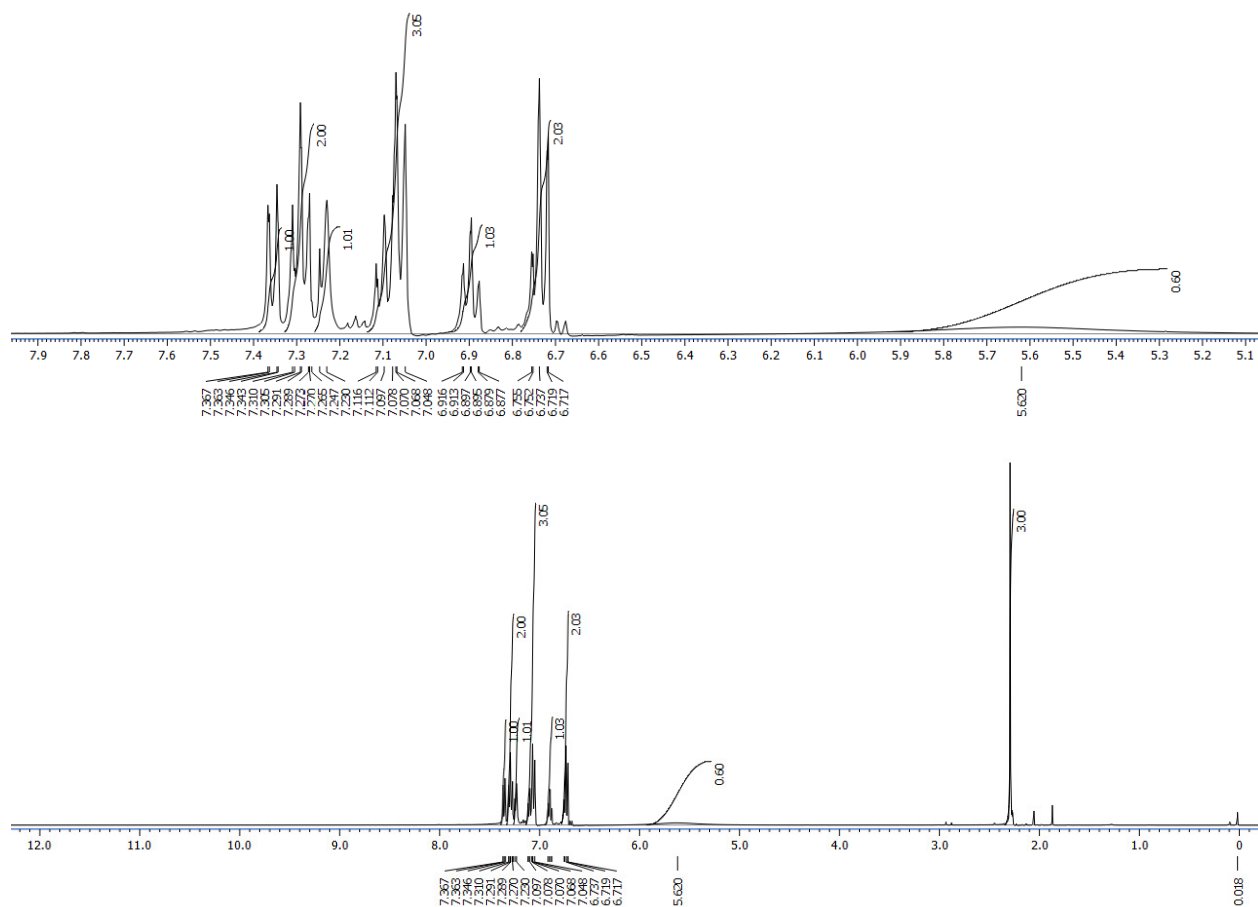

<sup>13</sup>C NMR

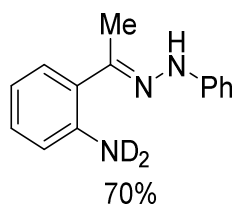

**(*E*)-2-(1-(2-Phenylhydrazono)ethyl)aniline-*d*<sub>2</sub> (1a-ND<sub>2</sub>)**

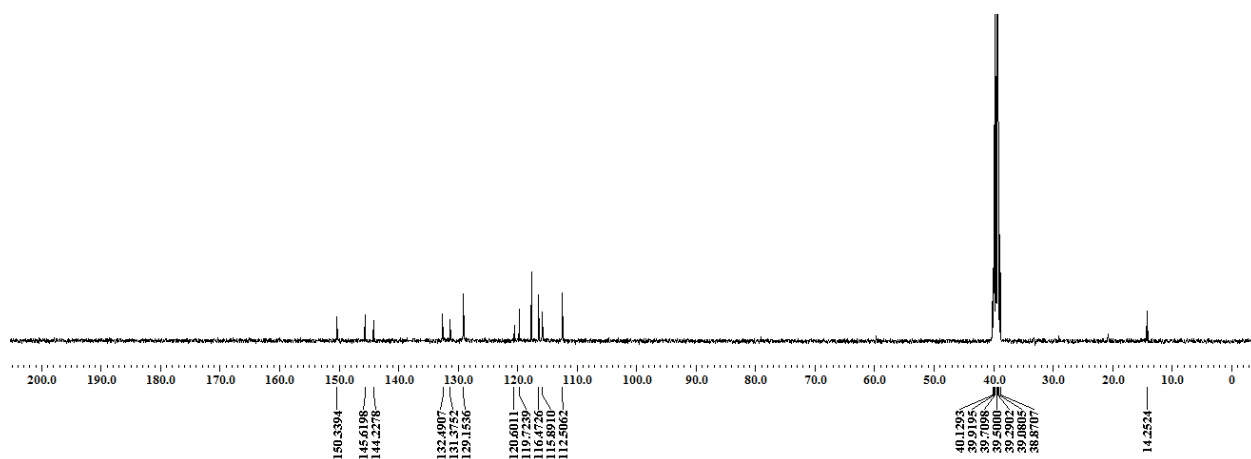



# HRMS

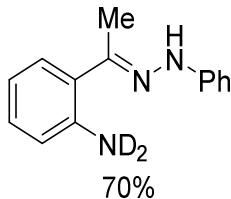

## (E)-2-(1-(2-Phenylhydrazono)ethyl)aniline-*d*<sub>2</sub> (1a-ND<sub>2</sub>)

### Qualitative Compound Report

|                               |              |                      |                     |
|-------------------------------|--------------|----------------------|---------------------|
| <b>Data File</b>              | VG-ND2.d     | <b>Sample Name</b>   | VG-ND2              |
| <b>Sample Type</b>            | Sample       | <b>Position</b>      | P1-D9               |
| <b>Instrument Name</b>        | Instrument 1 | <b>User Name</b>     |                     |
| <b>Acq Method</b>             | Damo JK.m    | <b>Acquired Time</b> | 04-07-2019 14:03:52 |
| <b>IRM Calibration Status</b> | Success      | <b>DA Method</b>     | Default.m           |
| <b>Comment</b>                |              |                      |                     |

|                       |                             |
|-----------------------|-----------------------------|
| <b>Sample Group</b>   | <b>Info.</b>                |
| <b>Acquisition SW</b> | 6200 series TOF/6500 series |
| <b>Version</b>        | Q-TOF B.05.01 (B5125.1)     |

#### Compound Table

| Compound Label       | RT    | Mass     | Formula       | MFG Formula   | MFG Diff (ppm) | DB Formula    |
|----------------------|-------|----------|---------------|---------------|----------------|---------------|
| Cpd 5: C14 H13 D2 N3 | 0.104 | 227.1372 | C14 H13 D2 N3 | C14 H13 D2 N3 | 8.7            | C14 H13 D2 N3 |

| Compound Label       | m/z      | RT    | Algorithm                 | Mass     |
|----------------------|----------|-------|---------------------------|----------|
| Cpd 5: C14 H13 D2 N3 | 228.1442 | 0.104 | Find by Molecular Feature | 227.1372 |

#### MFE MS Spectrum

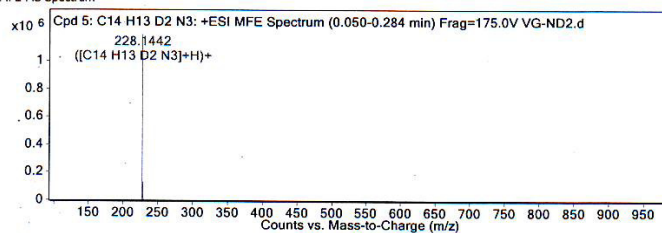

#### MFE MS Zoomed Spectrum

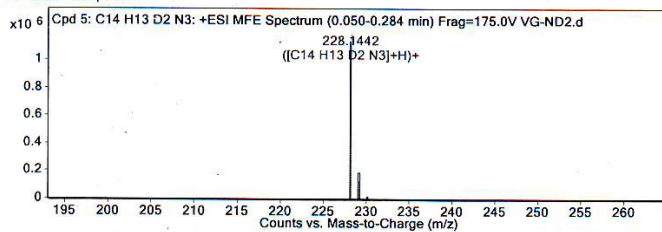

#### MS Spectrum Peak List

| m/z      | z | Abund      | Formula       | Ion    |
|----------|---|------------|---------------|--------|
| 228.1442 | 1 | 1193678.63 | C14 H13 D2 N3 | (M+H)+ |
| 229.1495 | 1 | 128035.37  | C14 H13 D2 N3 | (M+H)+ |
| 230.1569 | 1 | 9178.19    | C14 H13 D2 N3 | (M+H)+ |

--- End Of Report ---

<sup>1</sup>H NMR

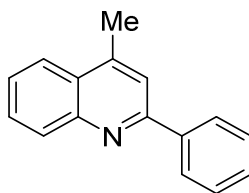

4-Methyl-2-phenylquinoline (3a)

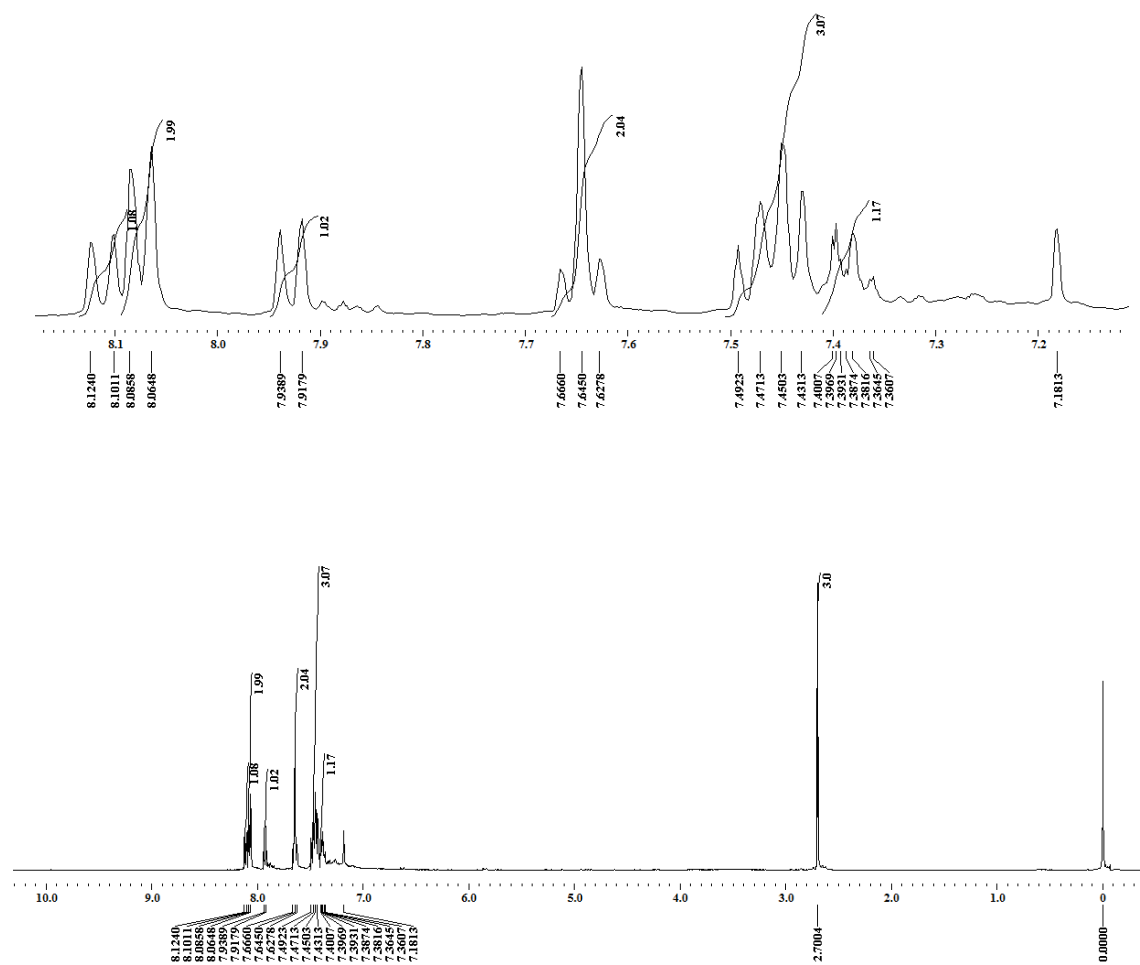

<sup>13</sup>C NMR



**4-Methyl-2-phenylquinoline (3a)**

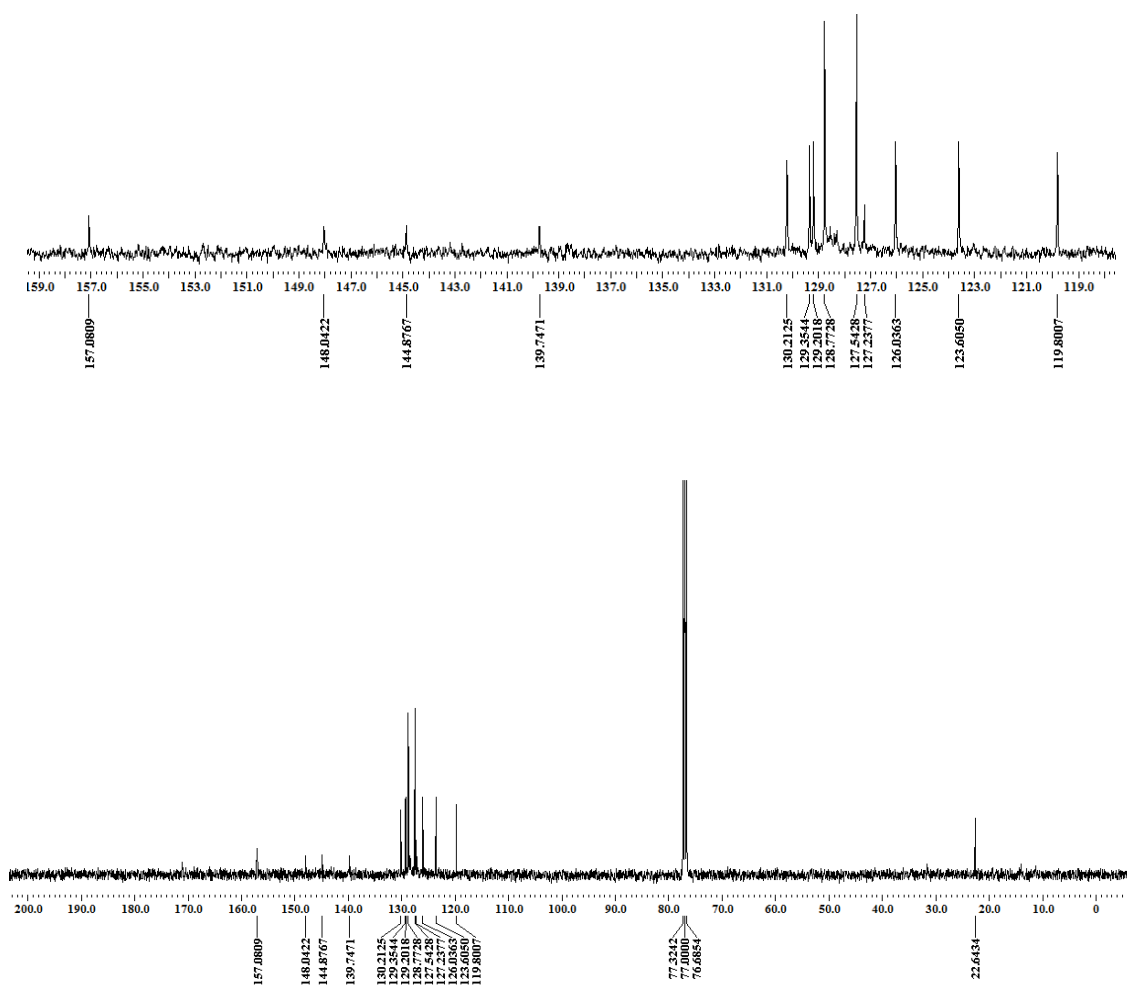

## HRMS

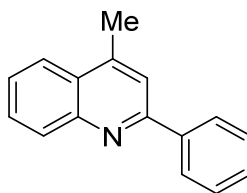

### 4-Methyl-2-phenylquinoline (3a)

MFE MS Spectrum

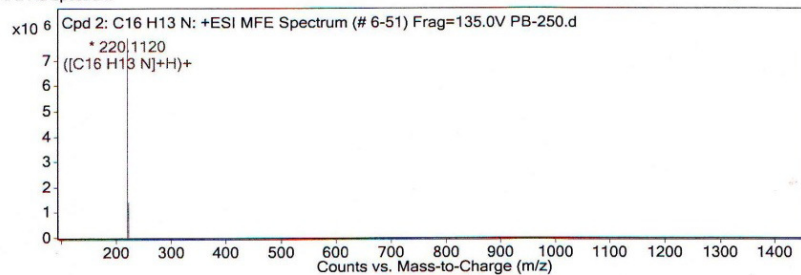

MFE MS Zoomed Spectrum

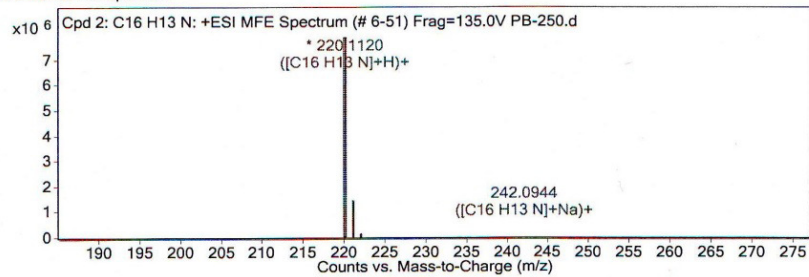

<sup>1</sup>H NMR

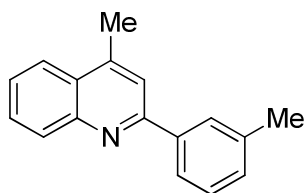

4-Methyl-2-(*m*-tolyl)quinoline (3b)

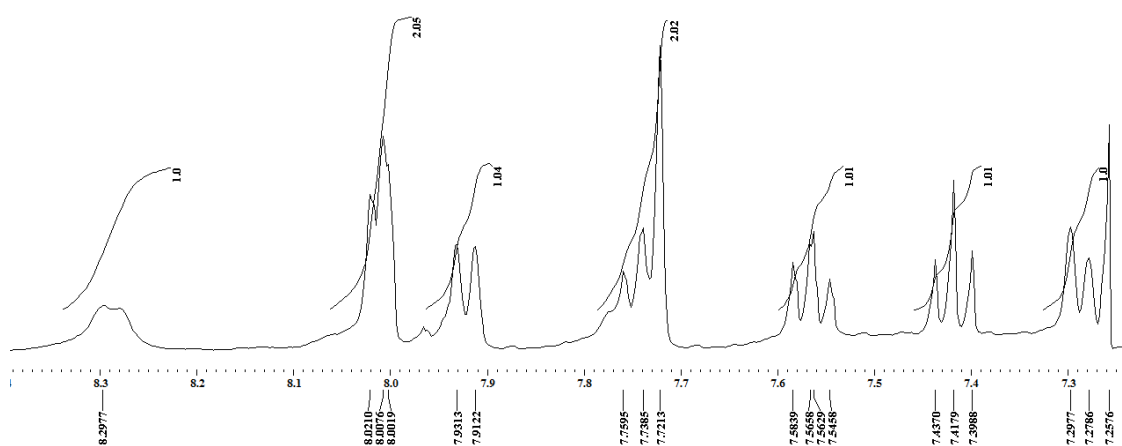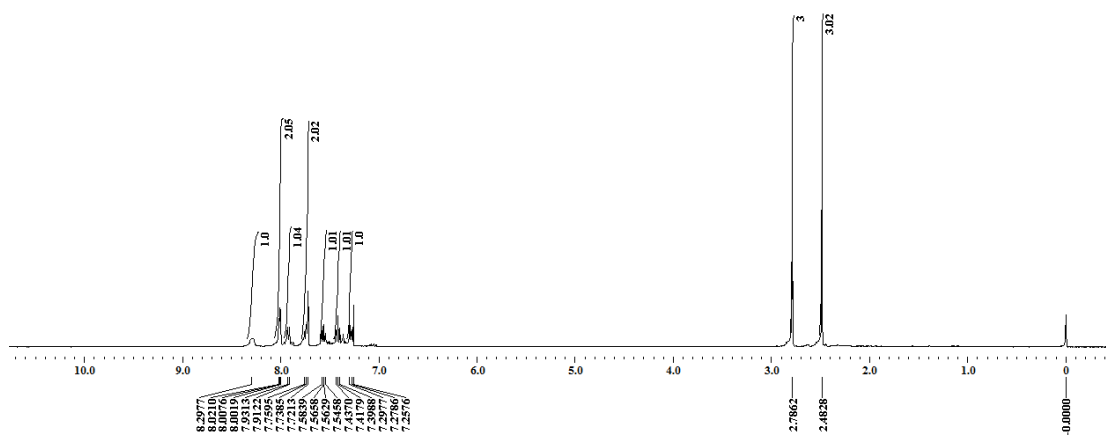

<sup>13</sup>C NMR

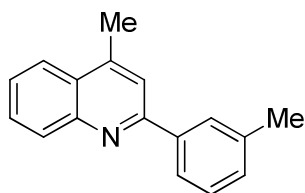

4-Methyl-2-(*m*-tolyl)quinoline (3b)

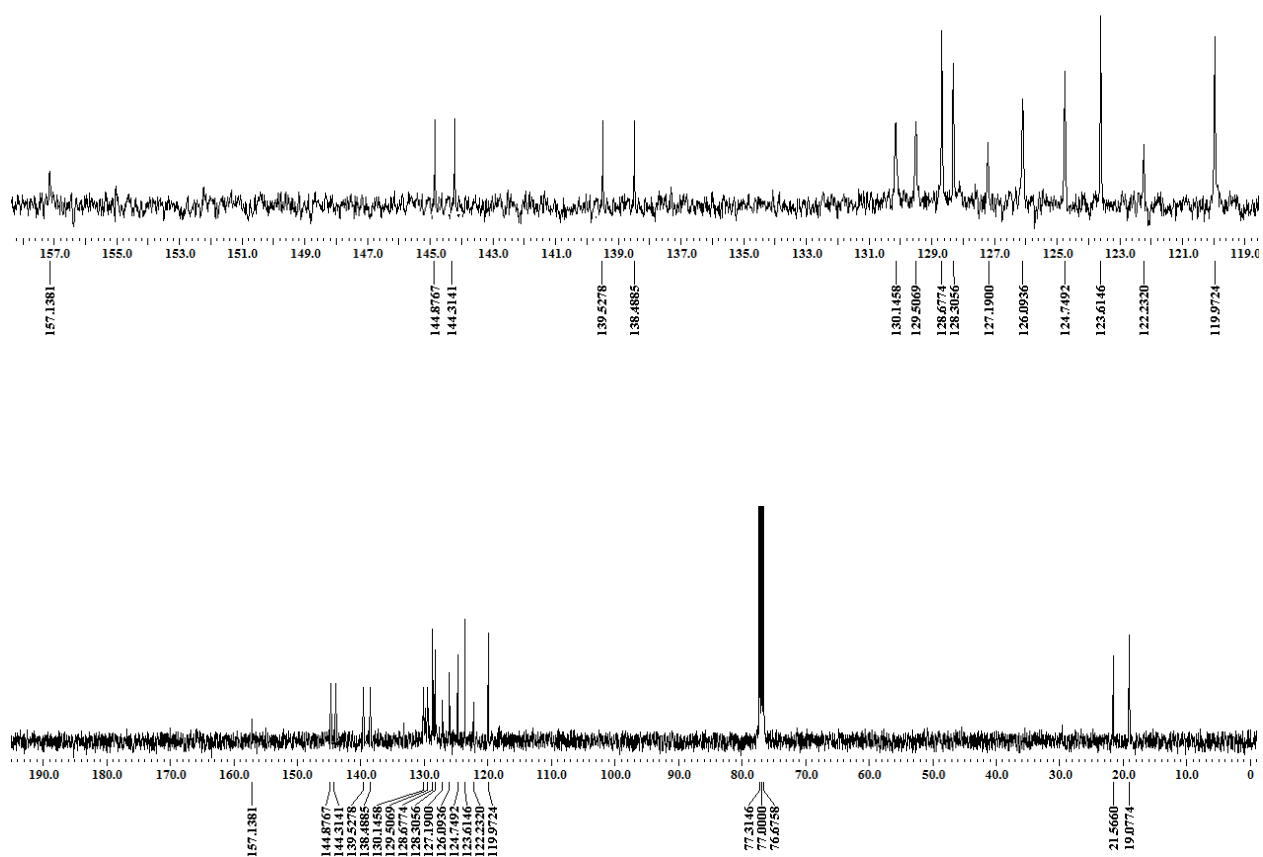

# HRMS

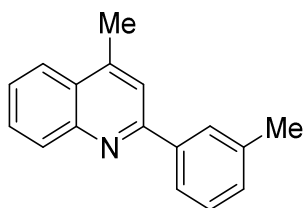

**4-Methyl-2-(*m*-tolyl)quinoline (3b)**

| Sample Name   | VG-PENT   | Position    | P1-E3     | Instrument Name | Instrument 1 | User Name              |                     |
|---------------|-----------|-------------|-----------|-----------------|--------------|------------------------|---------------------|
| Inj Vol       | 5         | InjPosition |           | SampleType      | Sample       | IRM Calibration Status | Success             |
| Data Filename | VG-PENT.d | ACQ Method  | Damo JK.m | Comment         |              | Acquired Time          | 06-03-2019 15:08:53 |

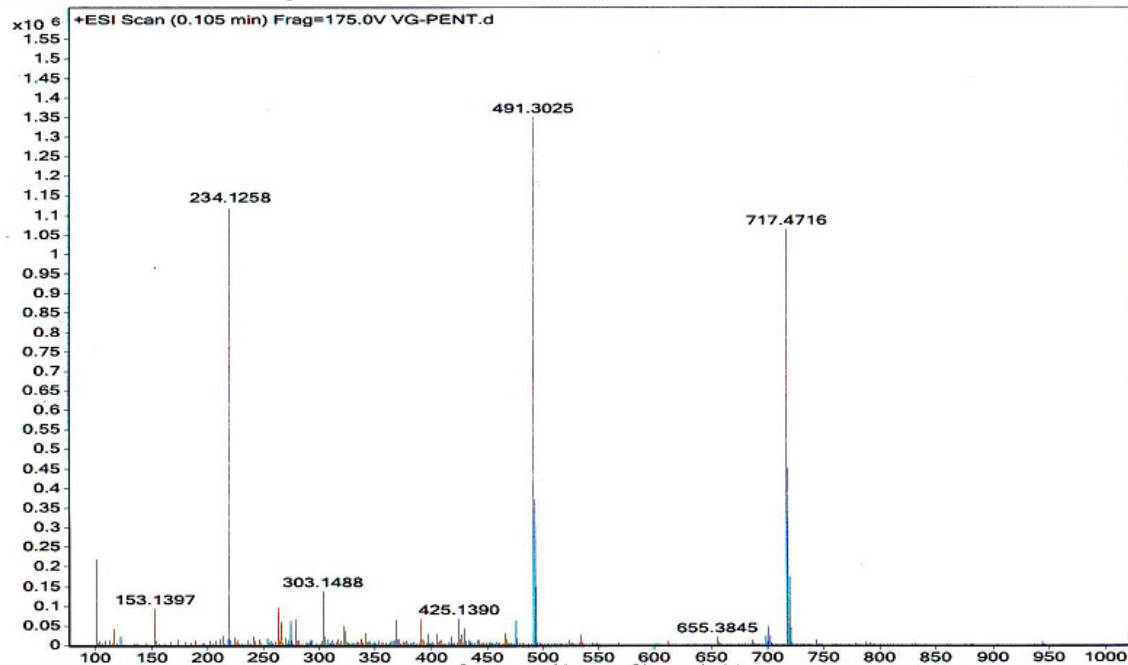

<sup>1</sup>H NMR

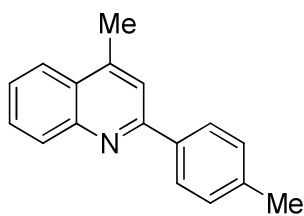

4-Methyl-2-(p-tolyl)quinoline (3c)

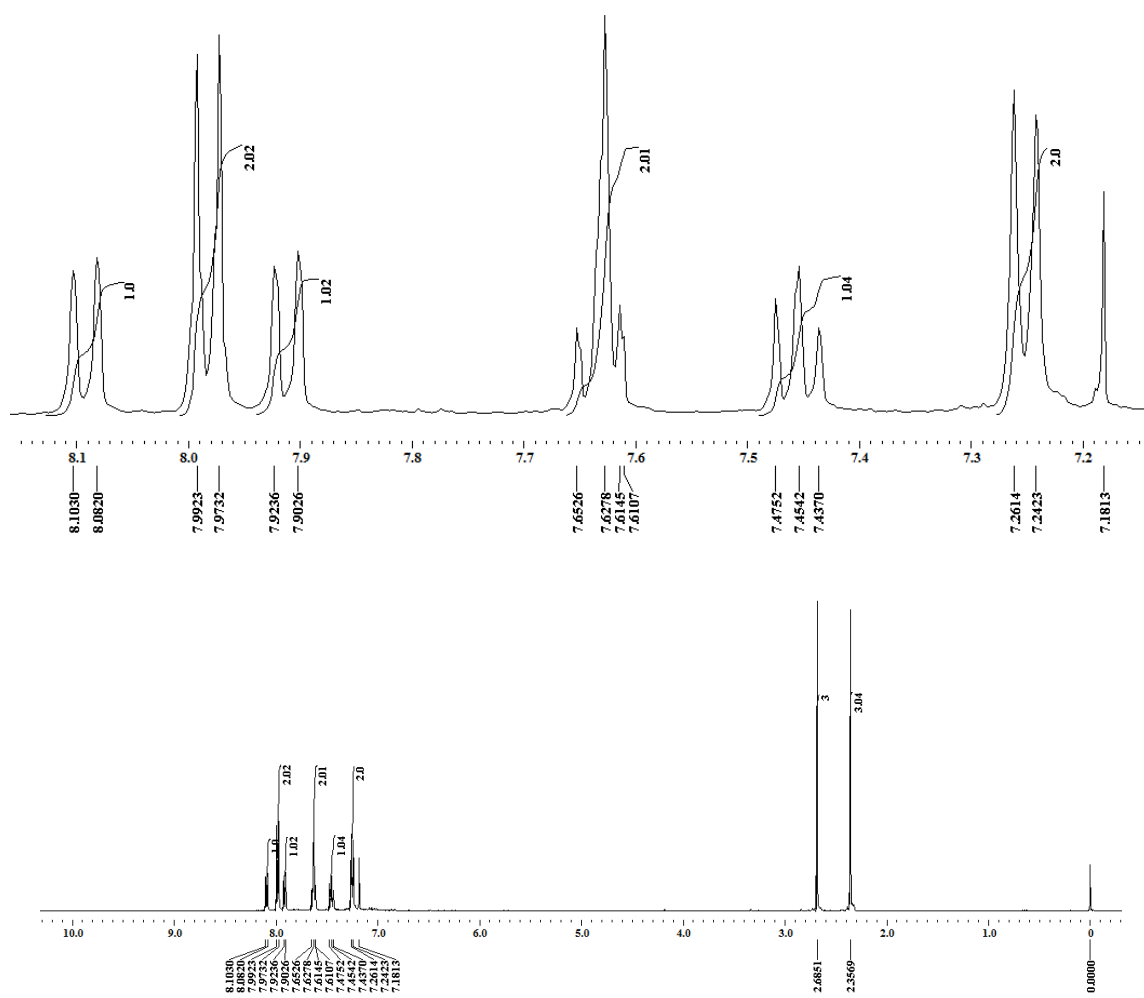



<sup>13</sup>C NMR

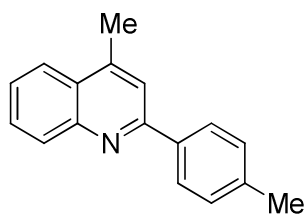

4-Methyl-2-(*p*-tolyl)quinoline (3c)

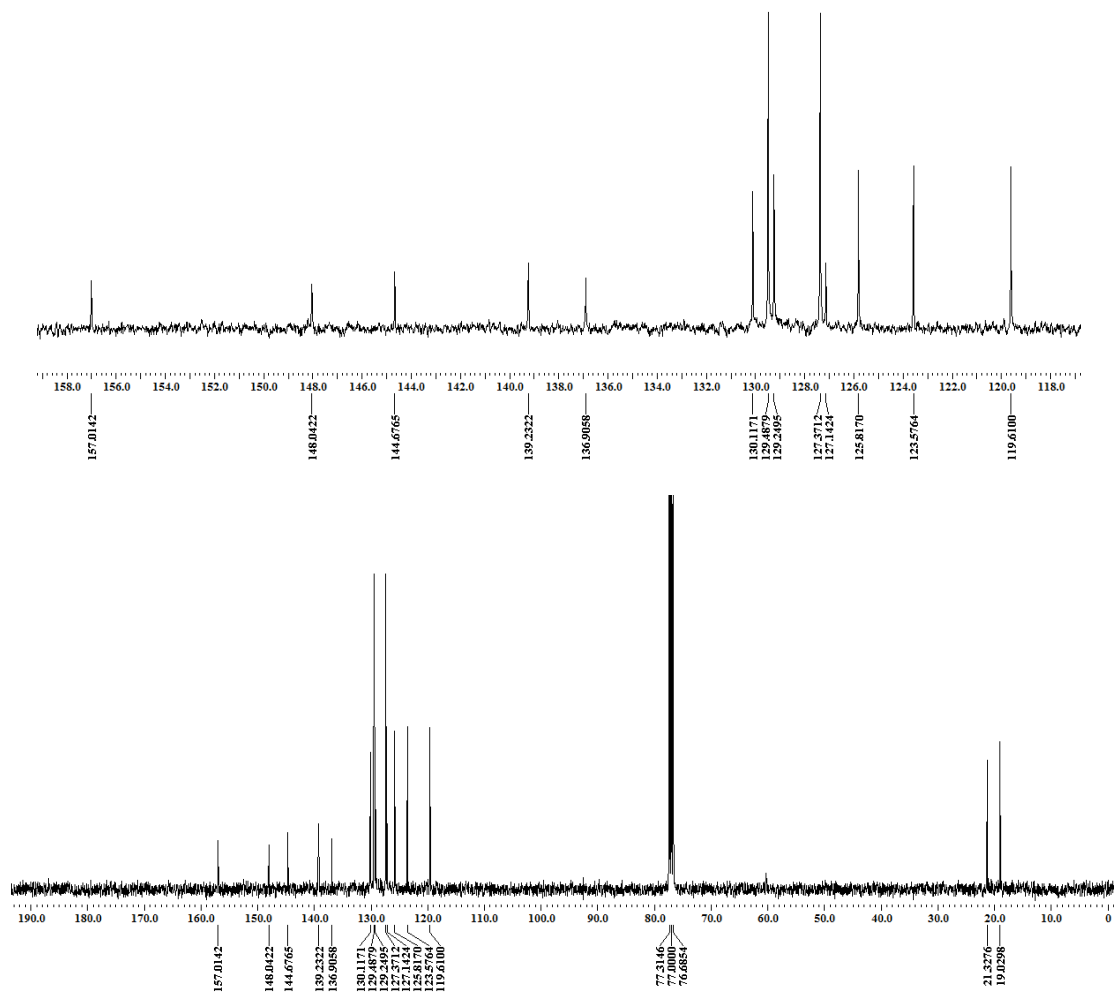

# HRMS

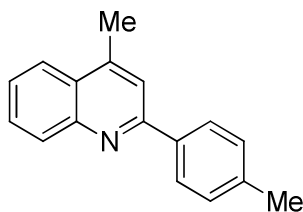

## 4-Methyl-2-(p-tolyl)quinoline (3c)

### Qualitative Compound Report

|                               |              |                      |                     |
|-------------------------------|--------------|----------------------|---------------------|
| <b>Data File</b>              | PB-581.d     | <b>Sample Name</b>   | PB-581              |
| <b>Sample Type</b>            | Sample       | <b>Position</b>      | P1-C4               |
| <b>Instrument Name</b>        | Instrument 1 | <b>User Name</b>     |                     |
| <b>Acq Method</b>             | 29.10.2014.m | <b>Acquired Time</b> | 07-03-2017 13:16:33 |
| <b>IRM Calibration Status</b> | Success      | <b>DA Method</b>     | Default.m           |
| <b>Comment</b>                |              |                      |                     |

|                       |                             |              |
|-----------------------|-----------------------------|--------------|
| <b>Sample Group</b>   |                             | <b>Info.</b> |
| <b>Acquisition SW</b> | 6200 series TOF/6500 series |              |
| <b>Version</b>        | Q-TOF B.05.01 (85125)       |              |

#### Compound Table

| Compound Label   | RT | Mass     | Formula   | MFG Formula | MFG Diff (ppm) | DB Formula |
|------------------|----|----------|-----------|-------------|----------------|------------|
| Cpd 2: C17 H15 N | 11 | 233.1211 | C17 H15 N | C17 H15 N   | -2.59          | C17 H15 N  |

| Compound Label   | m/z      | RT | Algorithm                 | Mass     |
|------------------|----------|----|---------------------------|----------|
| Cpd 2: C17 H15 N | 234.1283 | 11 | Find by Molecular Feature | 233.1211 |

#### MFE MS Spectrum

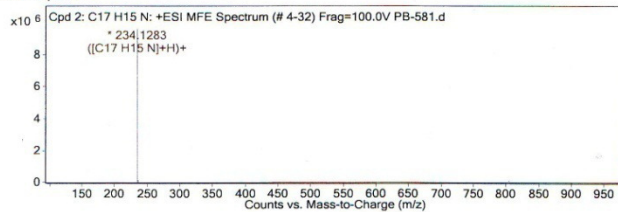

#### MFE MS Zoomed Spectrum

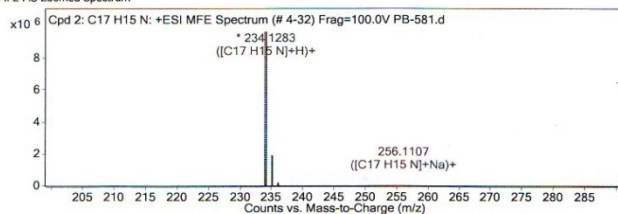

#### MS Spectrum Peak List

| m/z      | z | Abund      | Formula   | Ion     |
|----------|---|------------|-----------|---------|
| 234.1283 | 1 | 9651708    | C17 H15 N | (M+H)+  |
| 235.1317 | 1 | 1881110.23 | C17 H15 N | (M+H)+  |
| 236.1349 | 1 | 157295.68  | C17 H15 N | (M+H)+  |
| 237.1378 | 1 | 11367.29   | C17 H15 N | (M+H)+  |
| 256.1107 | 1 | 7215.1     | C17 H15 N | (M+Na)+ |

--- End Of Report ---

<sup>1</sup>H NMR

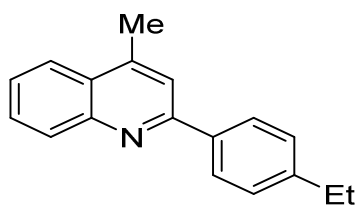

2-(4-Ethylphenyl)-4-methylquinoline (3e)

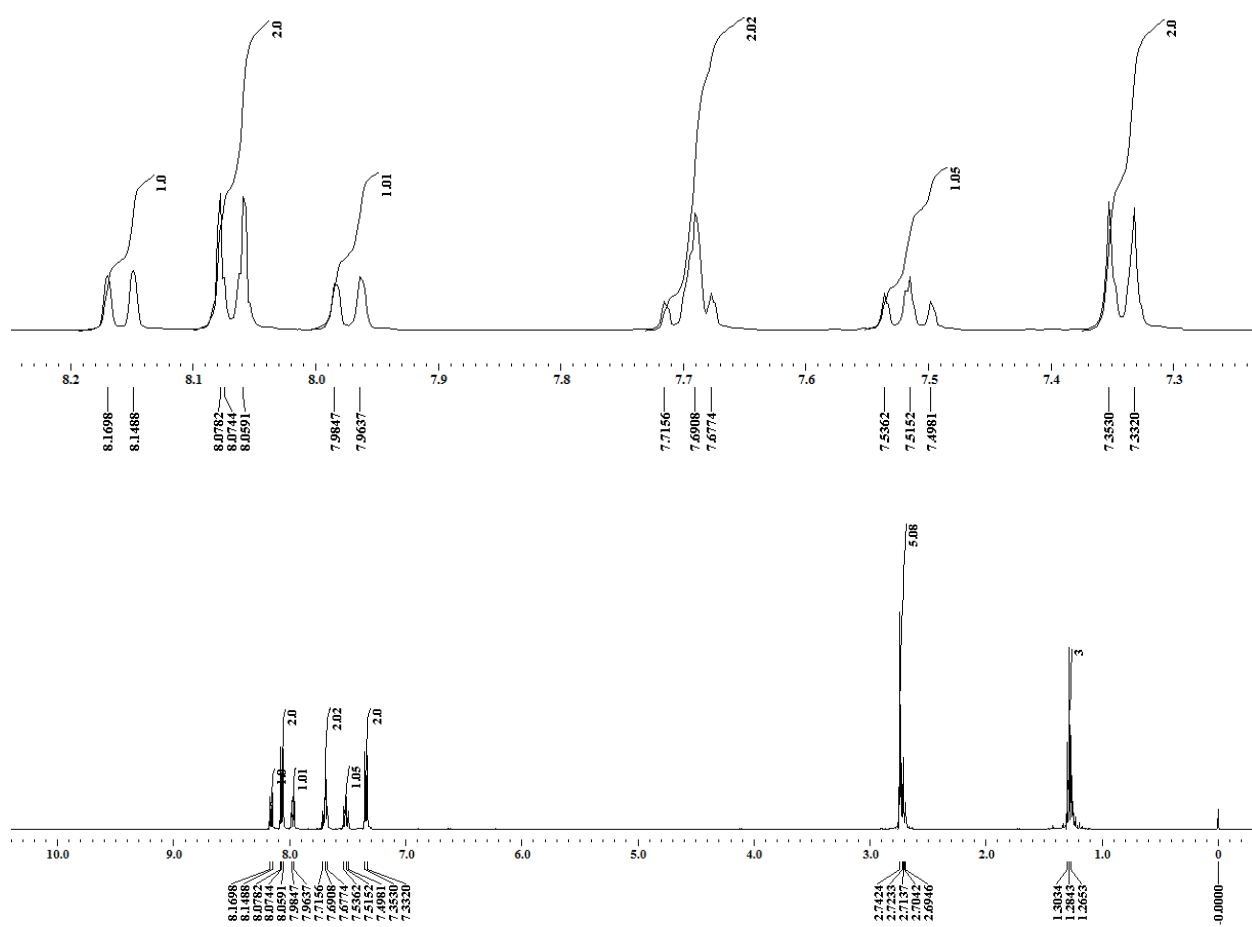

<sup>13</sup>C NMR

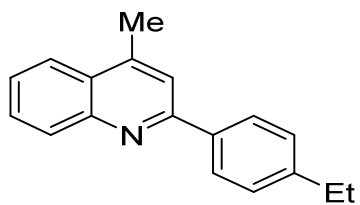

**2-(4-Ethylphenyl)-4-methylquinoline (3e)**

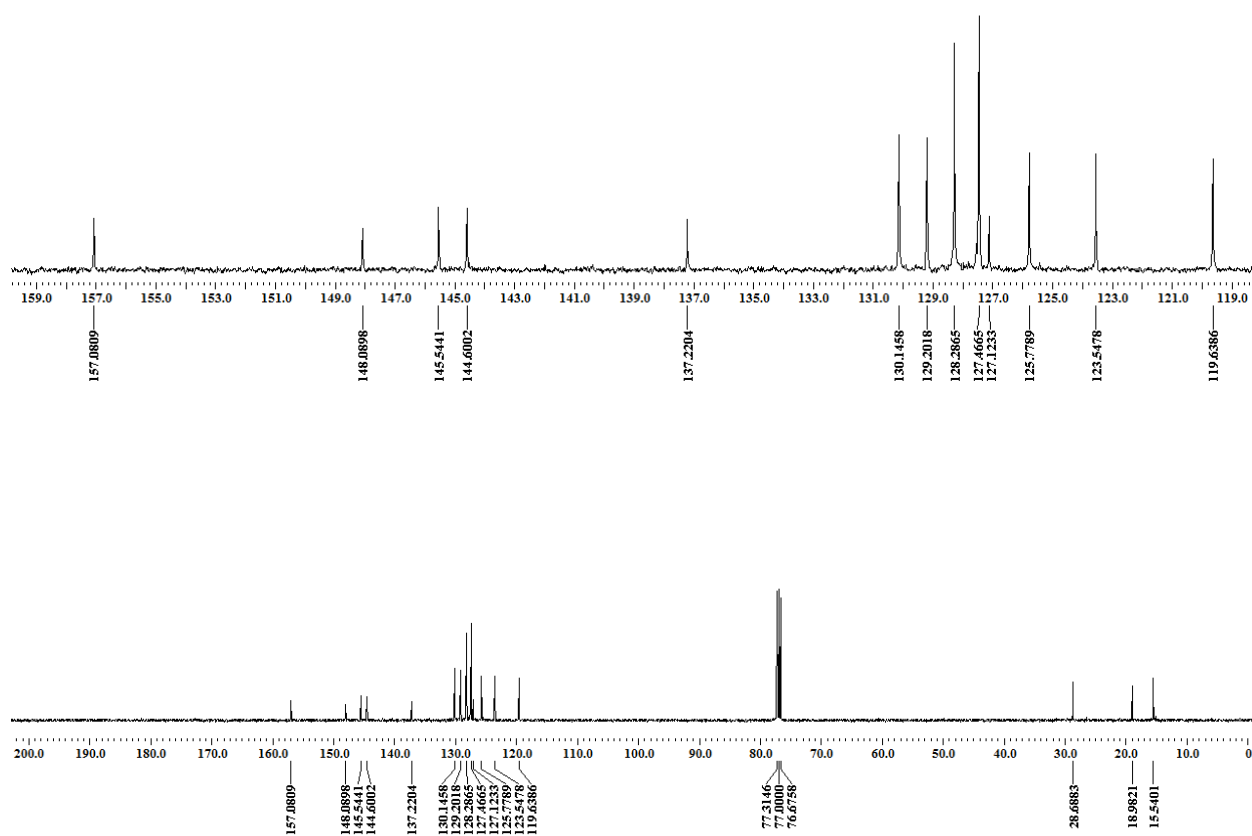

# HRMS

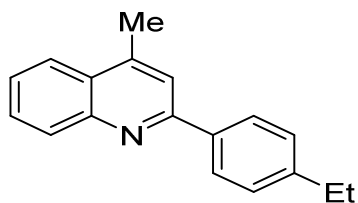

**2-(4-Ethylphenyl)-4-methylquinoline (3e)**

|               |          |             |              |                 |              |                        |                     |
|---------------|----------|-------------|--------------|-----------------|--------------|------------------------|---------------------|
| Sample Name   | VG-521   | Position    | P1-C4        | Instrument Name | Instrument 1 | User Name              |                     |
| Inj Vol       | 1        | InjPosition |              | SampleType      | Sample       | IRM Calibration Status | Success             |
| Data Filename | VG-521.d | ACQ Method  | 29.10.2014.m | Comment         |              | Acquired Time          | 27-04-2017 13:47:46 |

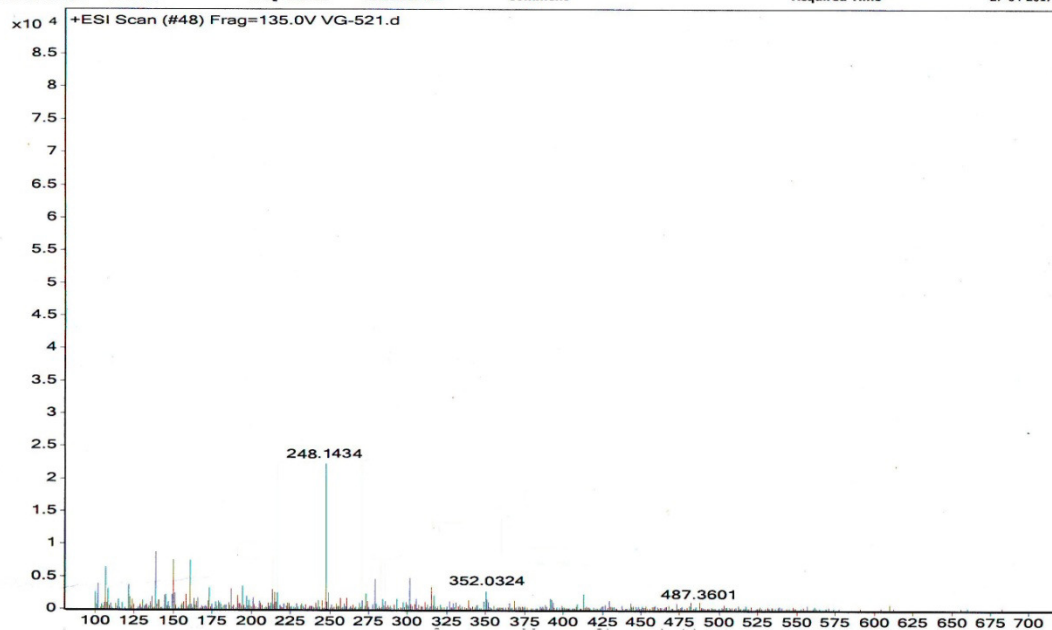

<sup>1</sup>H NMR

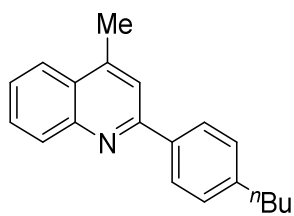

**2-(4-Butylphenyl)-4-methylquinoline (3f)**

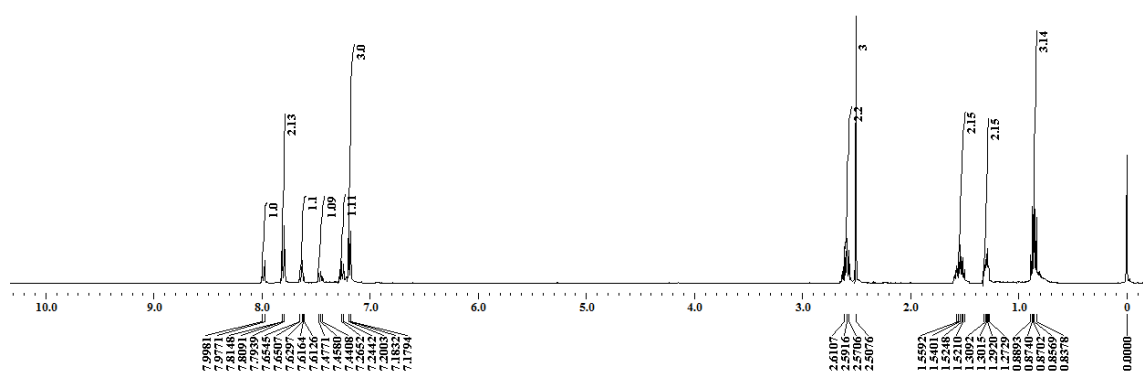

<sup>13</sup>C NMR



**2-(4-Butylphenyl)-4-methylquinoline (3f)**

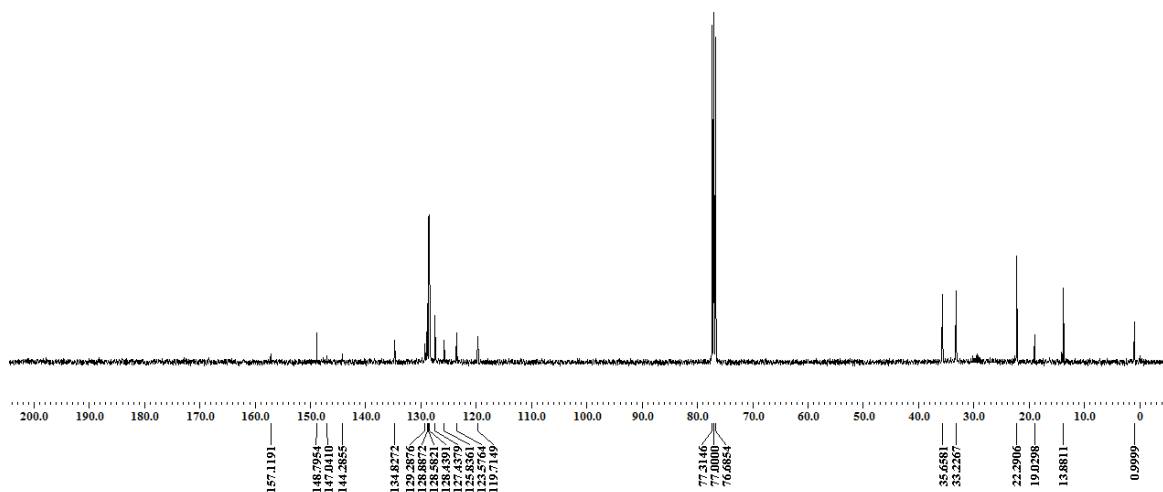

## HRMS

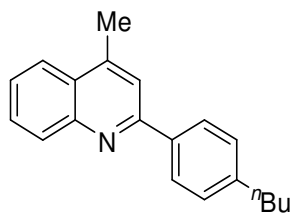

**2-(4-Butylphenyl)-4-methylquinoline (3f)**

MFE MS Spectrum

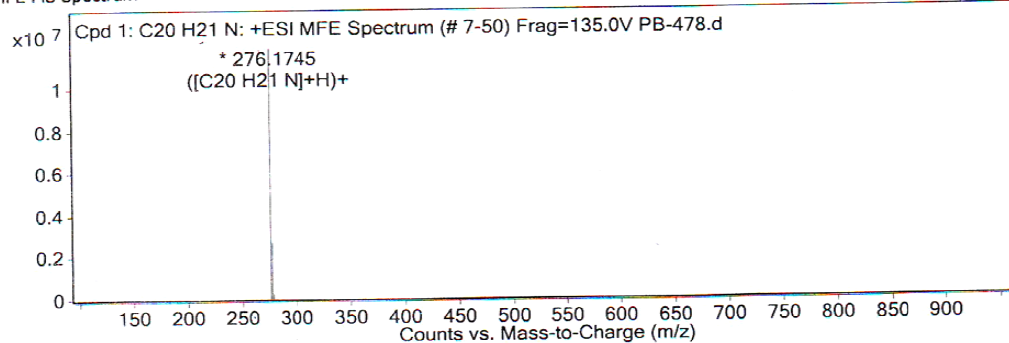

MFE MS Zoomed Spectrum

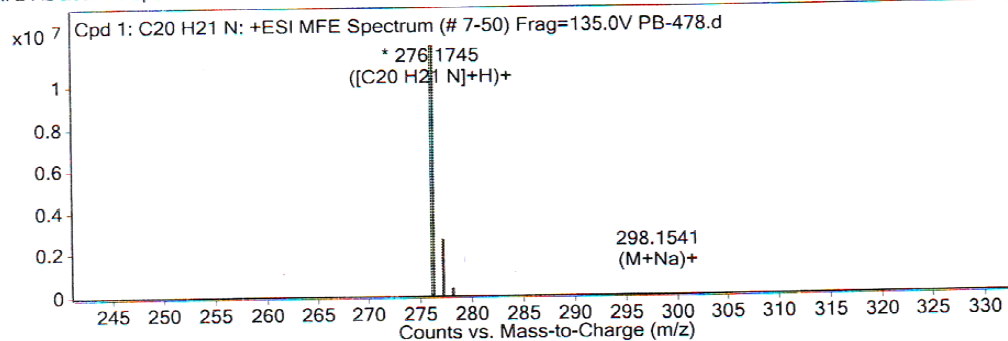



<sup>1</sup>H NMR

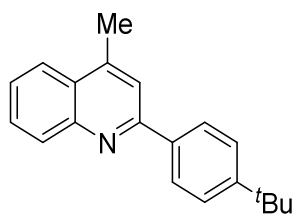

**2-(4-(*tert*-Butyl)phenyl)-4-methylquinoline (3g)**

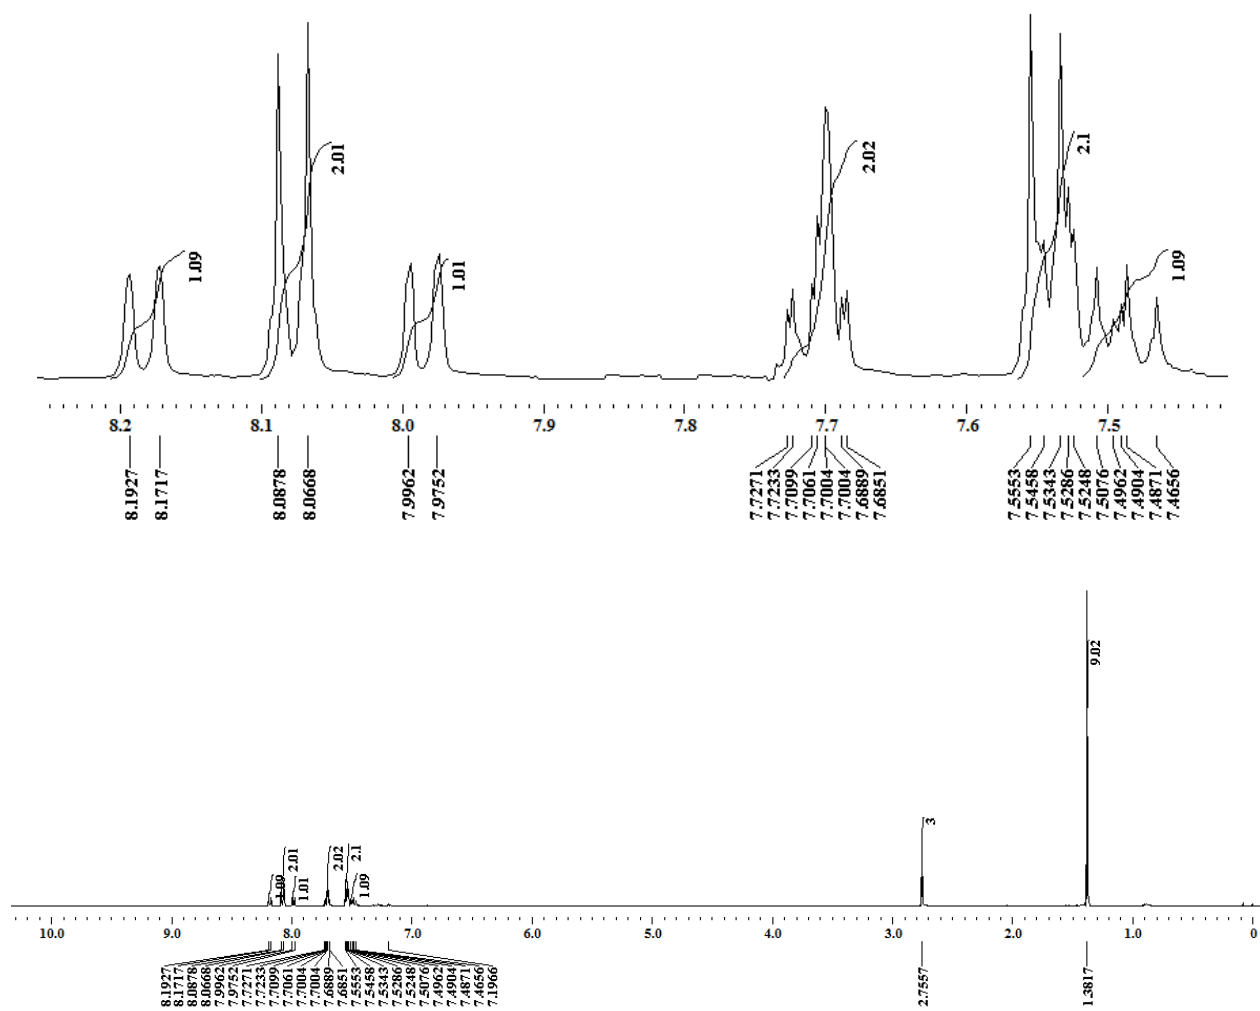

<sup>13</sup>C NMR

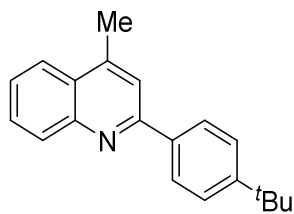

**2-(4-(*tert*-Butyl)phenyl)-4-methylquinoline (3g)**

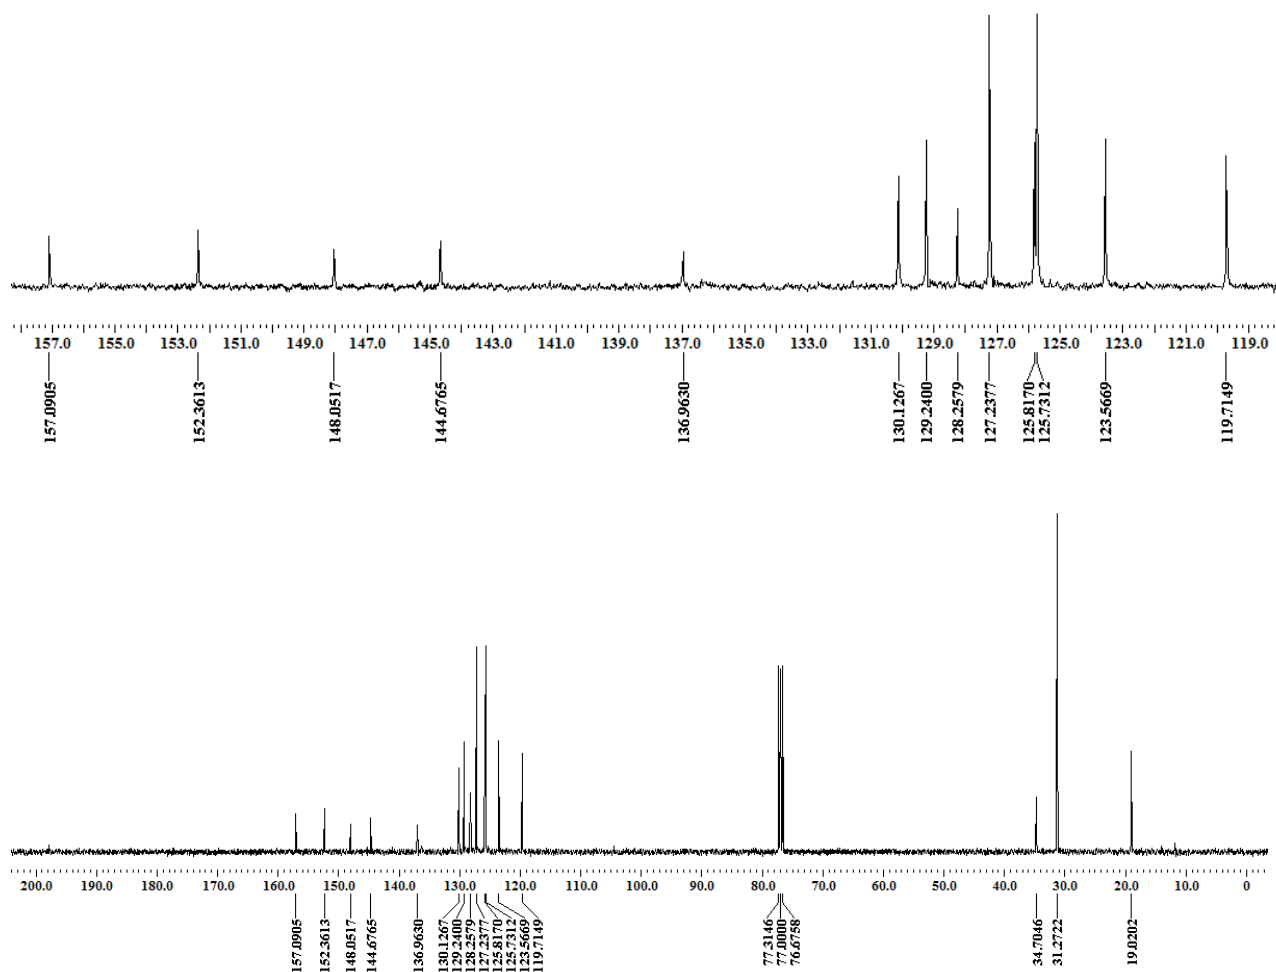

## HRMS

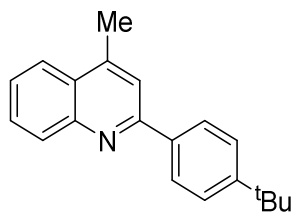

**2-(4-(*tert*-Butyl)phenyl)-4-methylquinoline (3g)**

MFE MS Spectrum

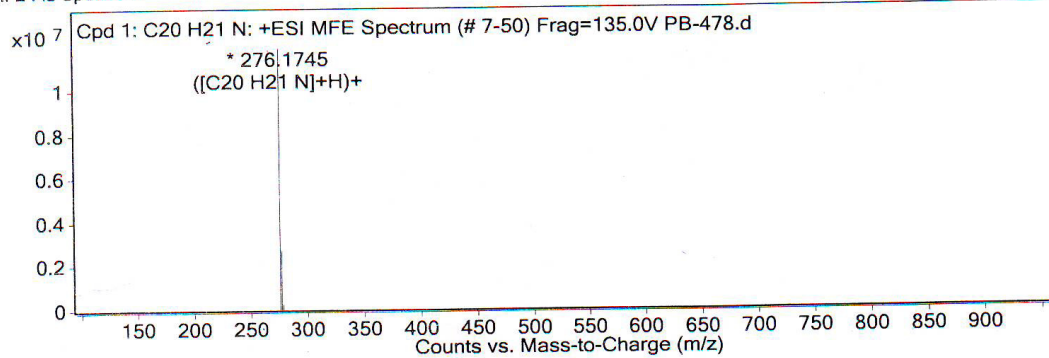

MFE MS Zoomed Spectrum

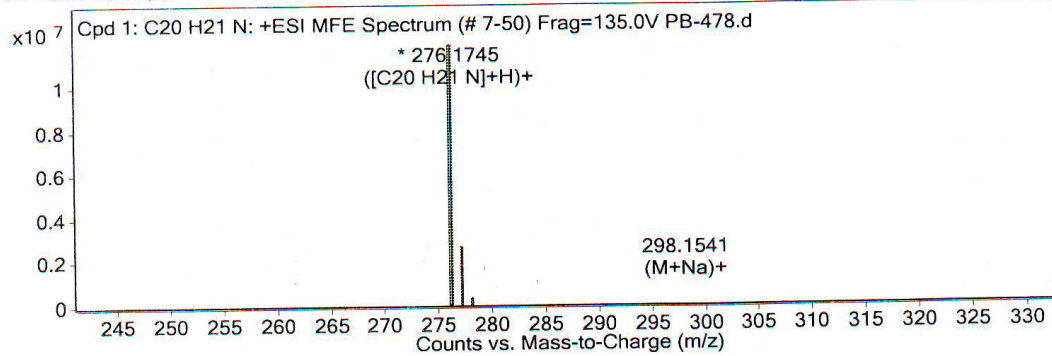

<sup>1</sup>H NMR

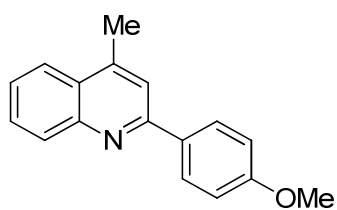

2-(4-Methoxyphenyl)-4-methylquinoline (3h)

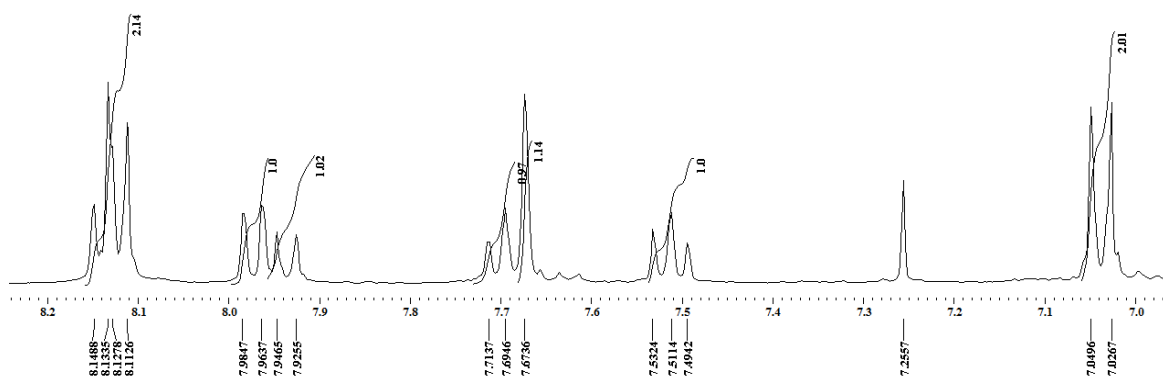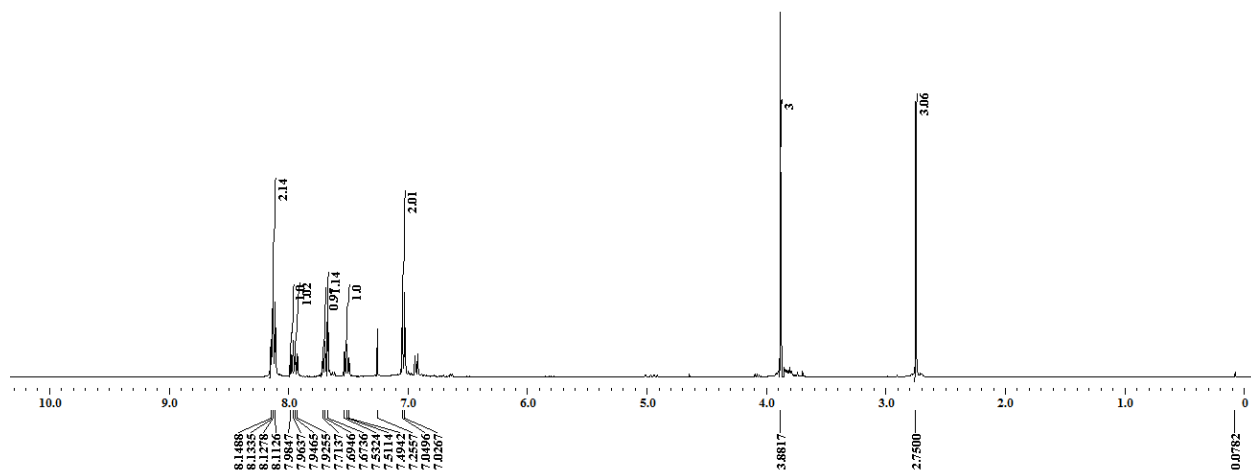

<sup>13</sup>C NMR

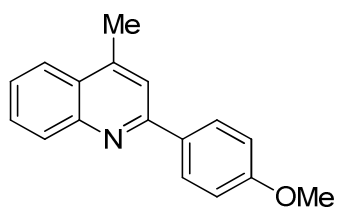

**2-(4-Methoxyphenyl)-4-methylquinoline (3h)**

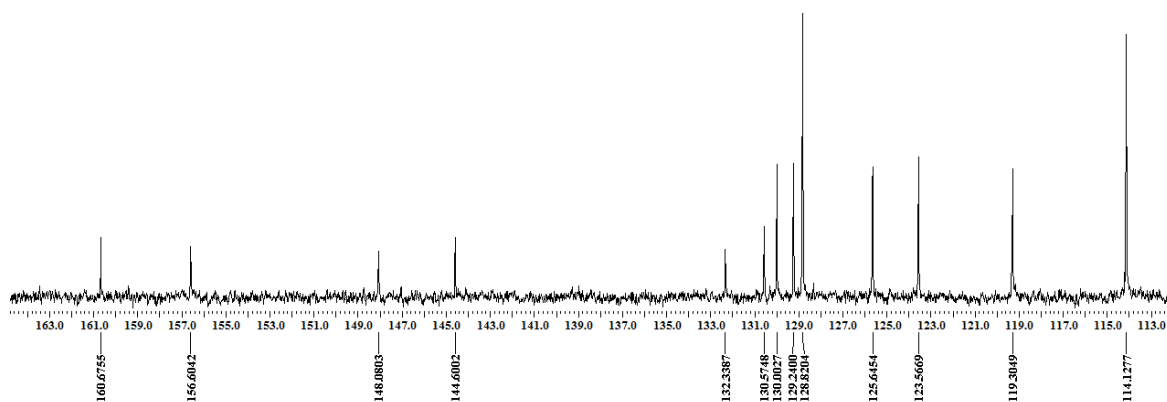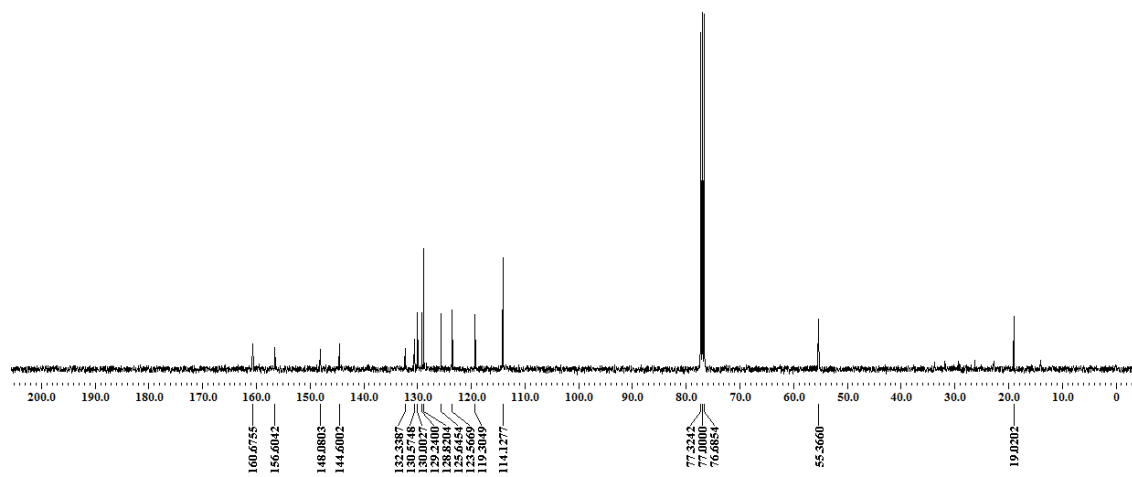

# HRMS

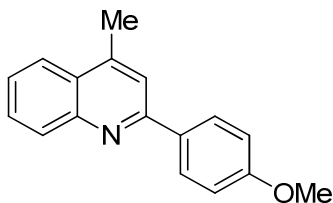

## 2-(4-Methoxyphenyl)-4-methylquinoline (3h)

### Qualitative Compound Report

|                               |              |                      |                     |
|-------------------------------|--------------|----------------------|---------------------|
| <b>Data File</b>              | PB-280.d     | <b>Sample Name</b>   | PB-280              |
| <b>Sample Type</b>            | Sample       | <b>Position</b>      | P1-B8               |
| <b>Instrument Name</b>        | Instrument 1 | <b>User Name</b>     | SMILY               |
| <b>Acq Method</b>             | 29.10.2014.m | <b>Acquired Time</b> | 19-01-2016 12:56:04 |
| <b>IRM Calibration Status</b> | Success      | <b>DA Method</b>     | Default.m           |
| <b>Comment</b>                |              |                      |                     |

|                       |                             |              |
|-----------------------|-----------------------------|--------------|
| <b>Sample Group</b>   |                             | <b>Info.</b> |
| <b>Acquisition SW</b> | 6200 series TOF/6500 series |              |
| <b>Version</b>        | Q-TOF B.05.01 (B5125)       |              |

#### Compound Table

| Compound Label     | RT | Mass     | Formula     | MFG Formula | MFG Diff (ppm) | DB Formula  |
|--------------------|----|----------|-------------|-------------|----------------|-------------|
| Cpd 4: C17 H15 N O | 10 | 249.1158 | C17 H15 N O | C17 H15 N O | -1.74          | C17 H15 N O |

| Compound Label     | m/z      | RT | Algorithm                 | Mass     |
|--------------------|----------|----|---------------------------|----------|
| Cpd 4: C17 H15 N O | 250.1231 | 10 | Find by Molecular Feature | 249.1158 |

#### MFE MS Spectrum

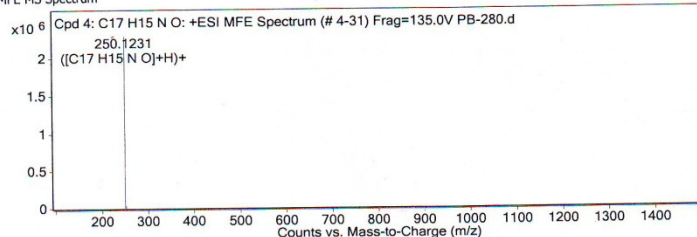

#### MFE MS Zoomed Spectrum

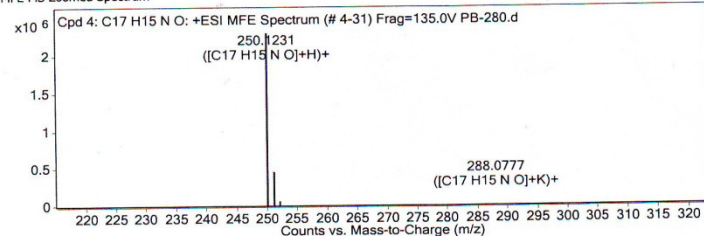

#### MS Spectrum Peak List

| m/z      | z | Abund    | Formula     | Ion    |
|----------|---|----------|-------------|--------|
| 250.1231 | 1 | 2297977  | C17 H15 N O | (M+H)+ |
| 251.1262 | 1 | 440188.7 | C17 H15 N O | (M+H)+ |
| 252.129  | 1 | 41203.89 | C17 H15 N O | (M+H)+ |
| 253.1329 | 1 | 4208.48  | C17 H15 N O | (M+H)+ |
| 288.0777 | 1 | 419.65   | C17 H15 N O | (M+K)+ |

<sup>1</sup>H NMR

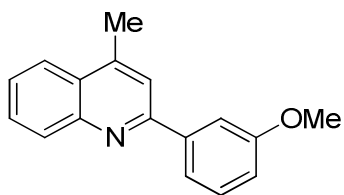

**2-(3-Methoxyphenyl)-4-methylquinoline (3i)**

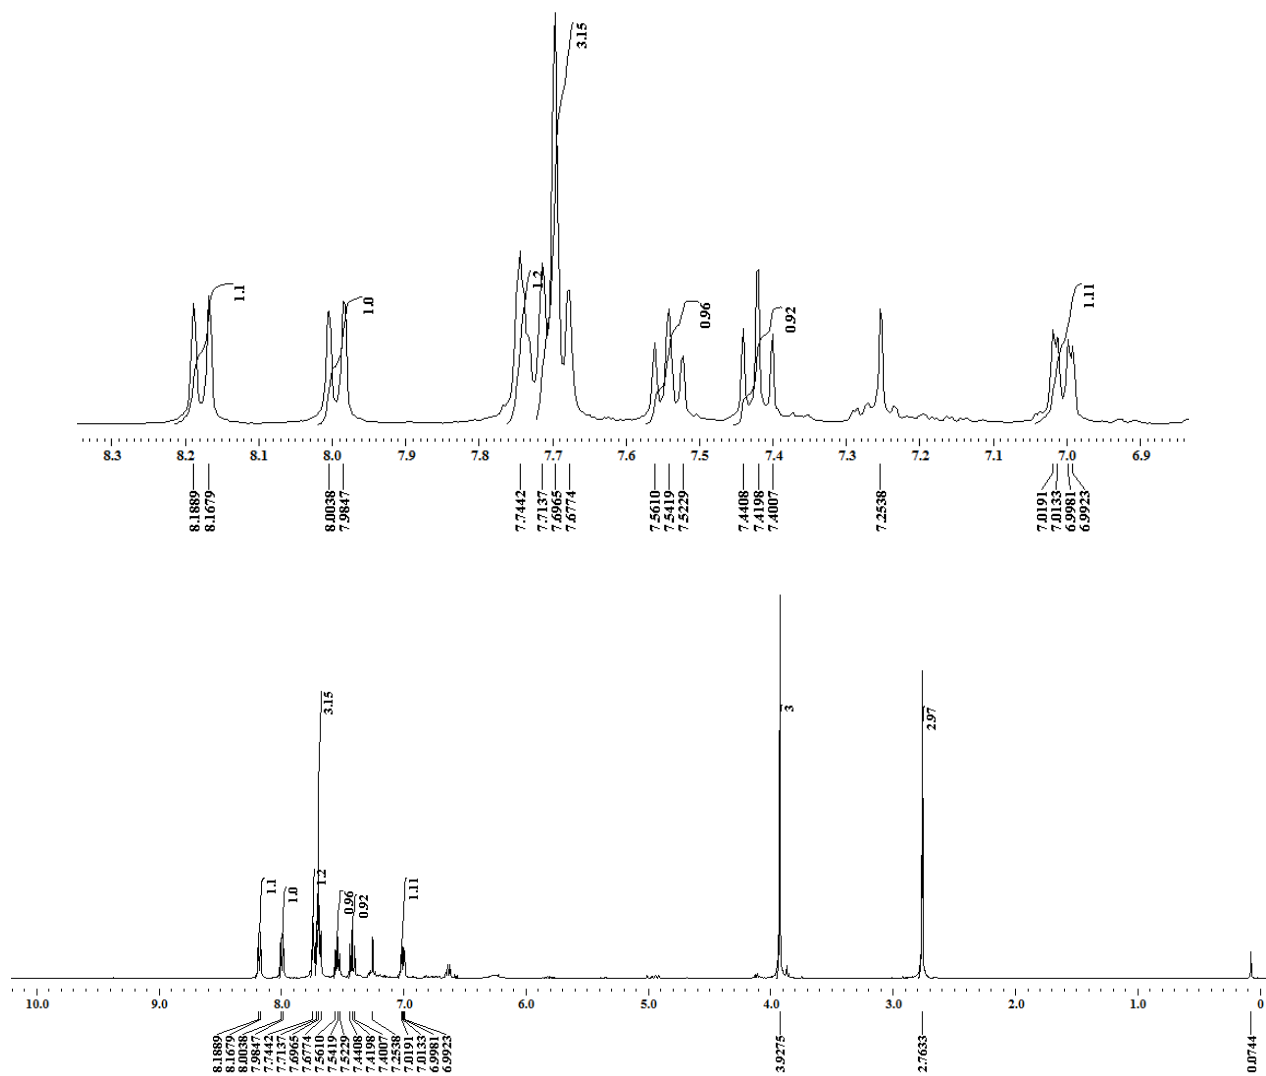

<sup>13</sup>C NMR



**2-(3-Methoxyphenyl)-4-methylquinoline (3i)**

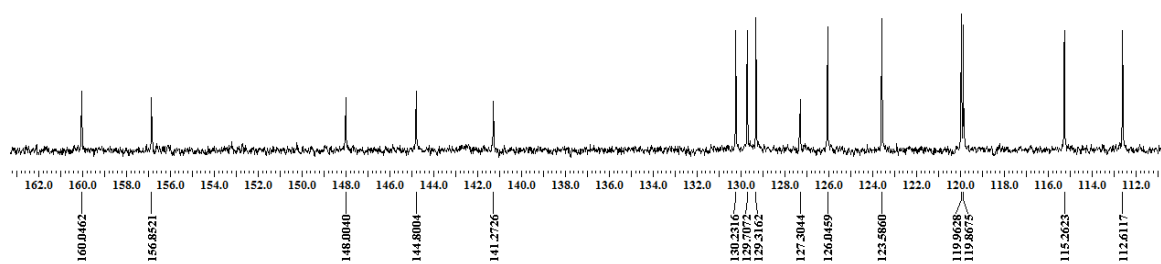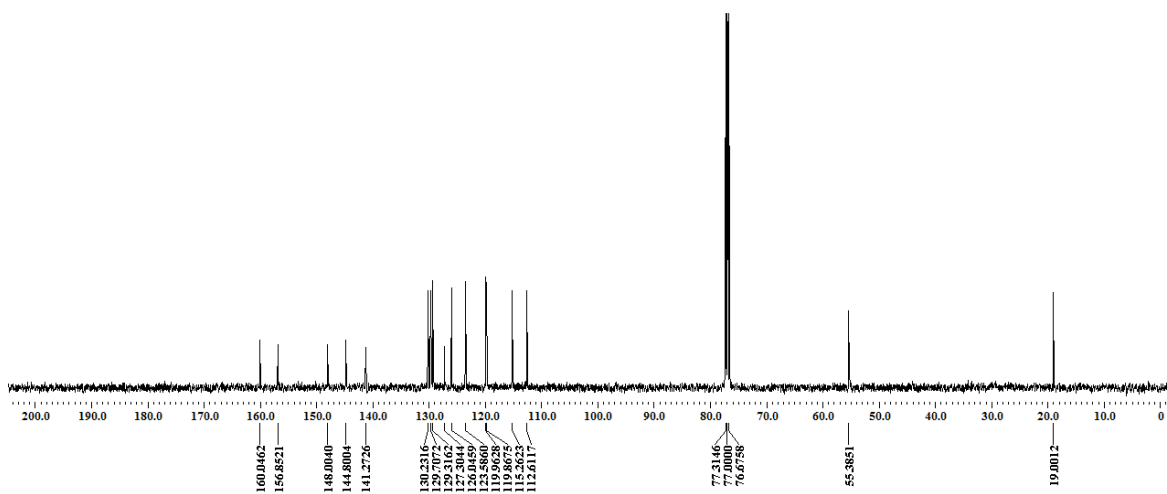



# HRMS

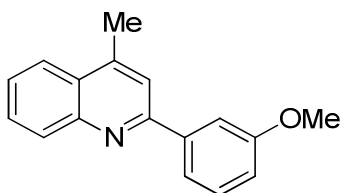

**2-(3-Methoxyphenyl)-4-methylquinoline (3i)**

|               |          |             |           |                 |              |                        |                     |
|---------------|----------|-------------|-----------|-----------------|--------------|------------------------|---------------------|
| Sample Name   | VG-632   | Position    | P1-B2     | Instrument Name | Instrument 1 | User Name              |                     |
| Inj Vol       | 5        | InjPosition |           | SampleType      | Sample       | IRM Calibration Status | Success             |
| Data Filename | VG-632.d | ACQ Method  | Demo JK.m | Comment         |              | Acquired Time          | 02-04-2019 10:43:23 |

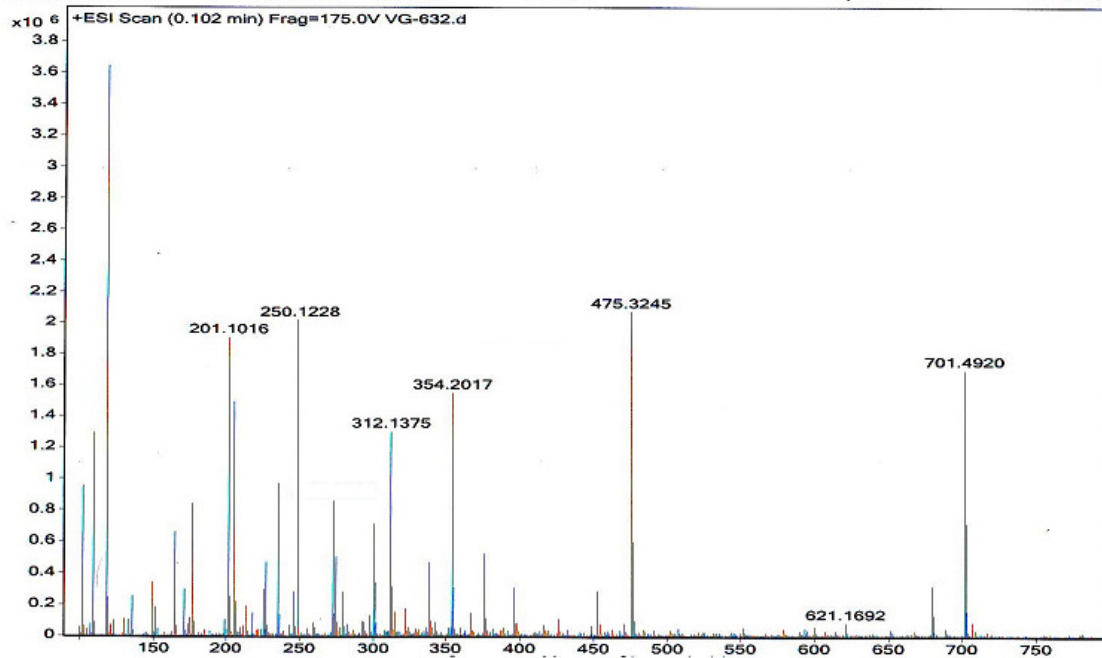

<sup>1</sup>H NMR

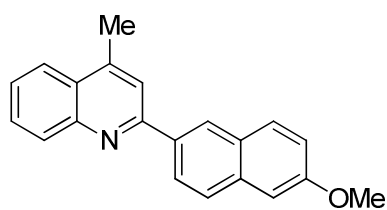

2-(6-Methoxynaphthalen-2-yl)-4-methylquinoline (3j)

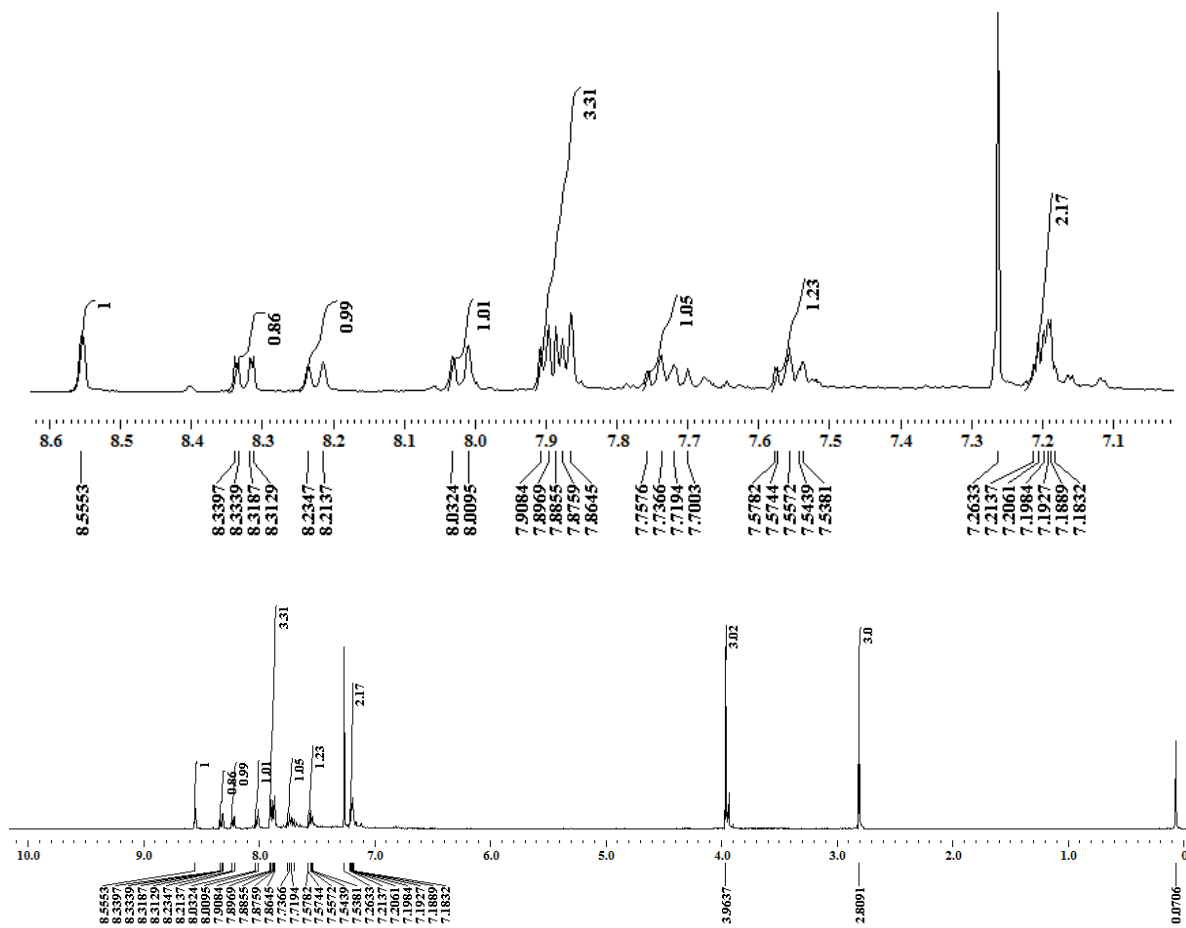

<sup>13</sup>C NMR

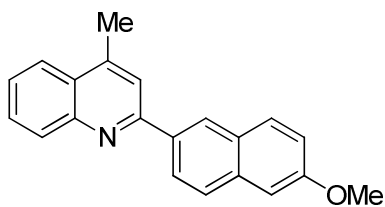

2-(6-Methoxynaphthalen-2-yl)-4-methylquinoline (3j)

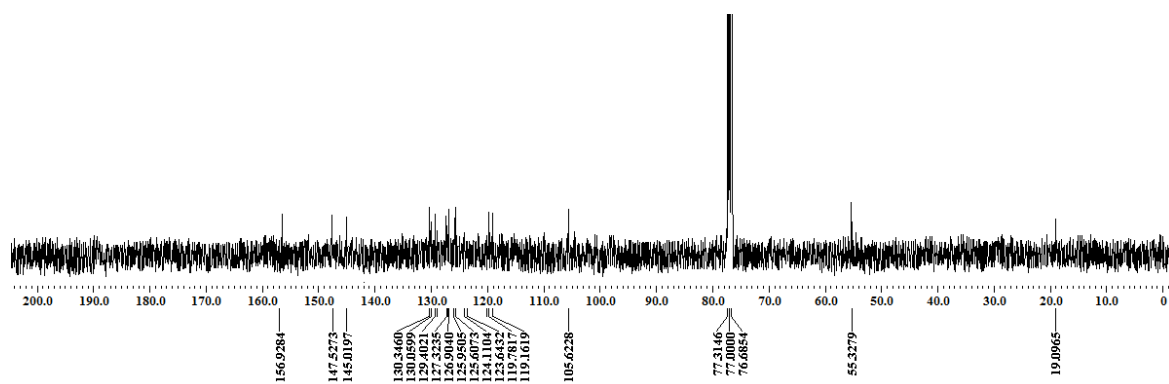

## HRMS

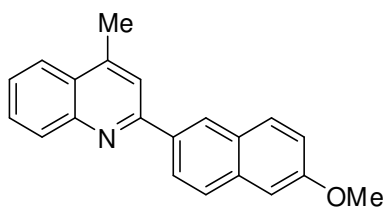

**2-(6-Methoxynaphthalen-2-yl)-4-methylquinoline (3j)**

MFE MS Spectrum

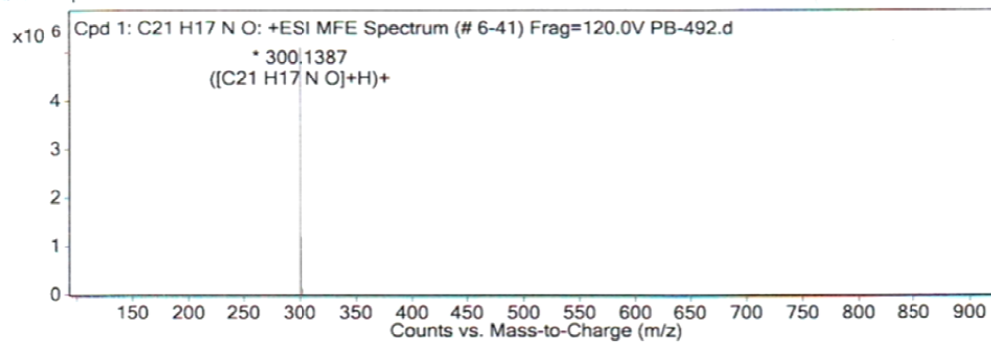

MFE MS Zoomed Spectrum

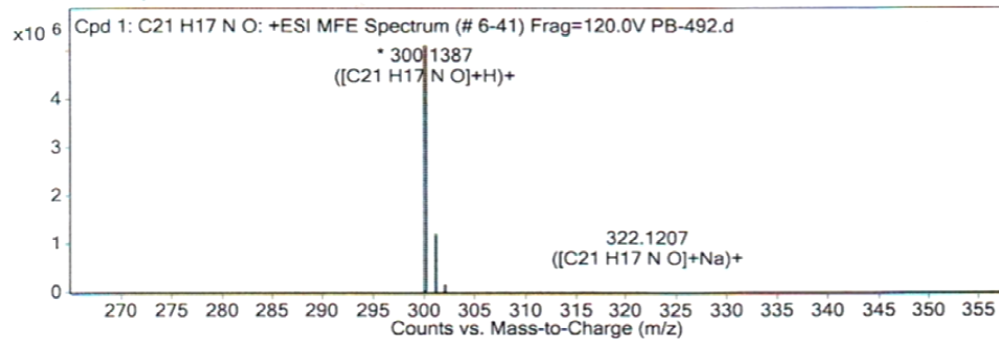

<sup>1</sup>H NMR

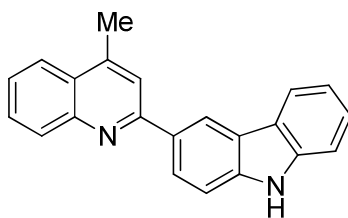

**3-(4-Methylquinolin-2-yl)-9H-carbazole (3k)**

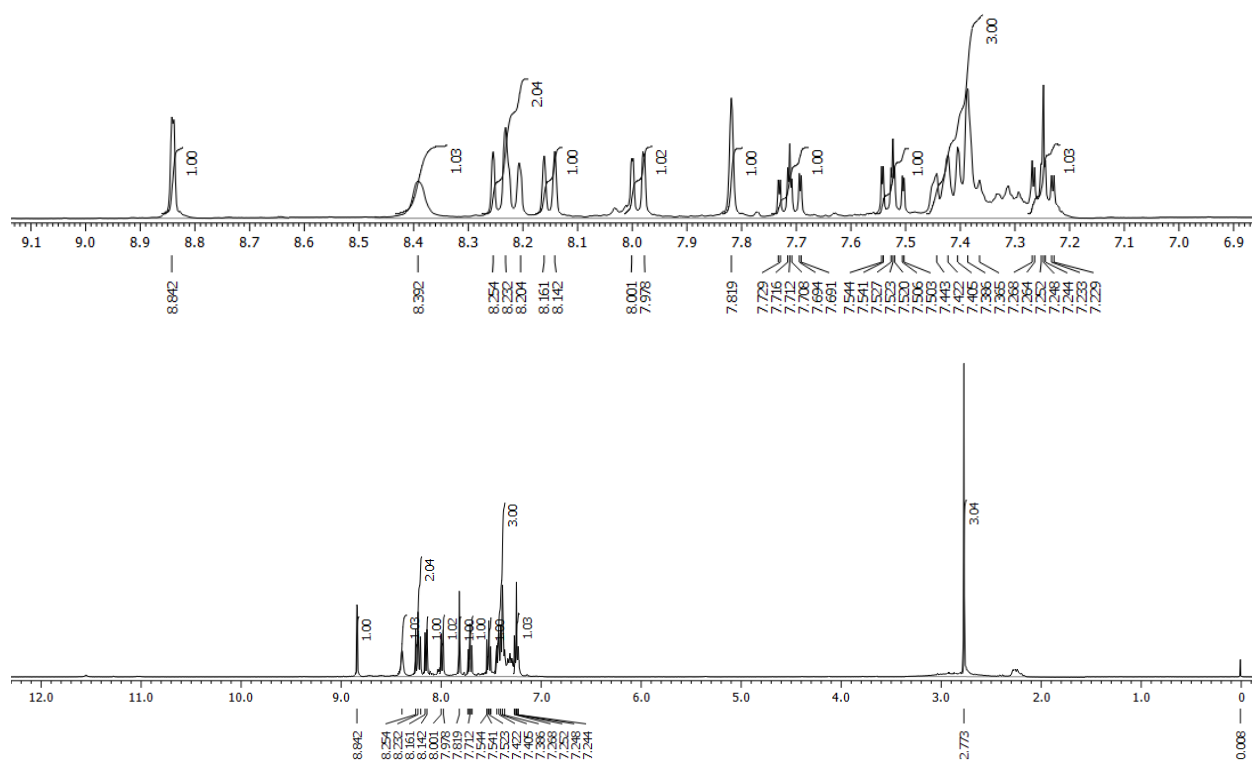

<sup>13</sup>C NMR

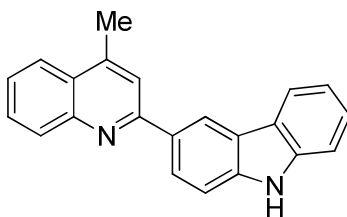

**3-(4-Methylquinolin-2-yl)-9H-carbazole (3k)**

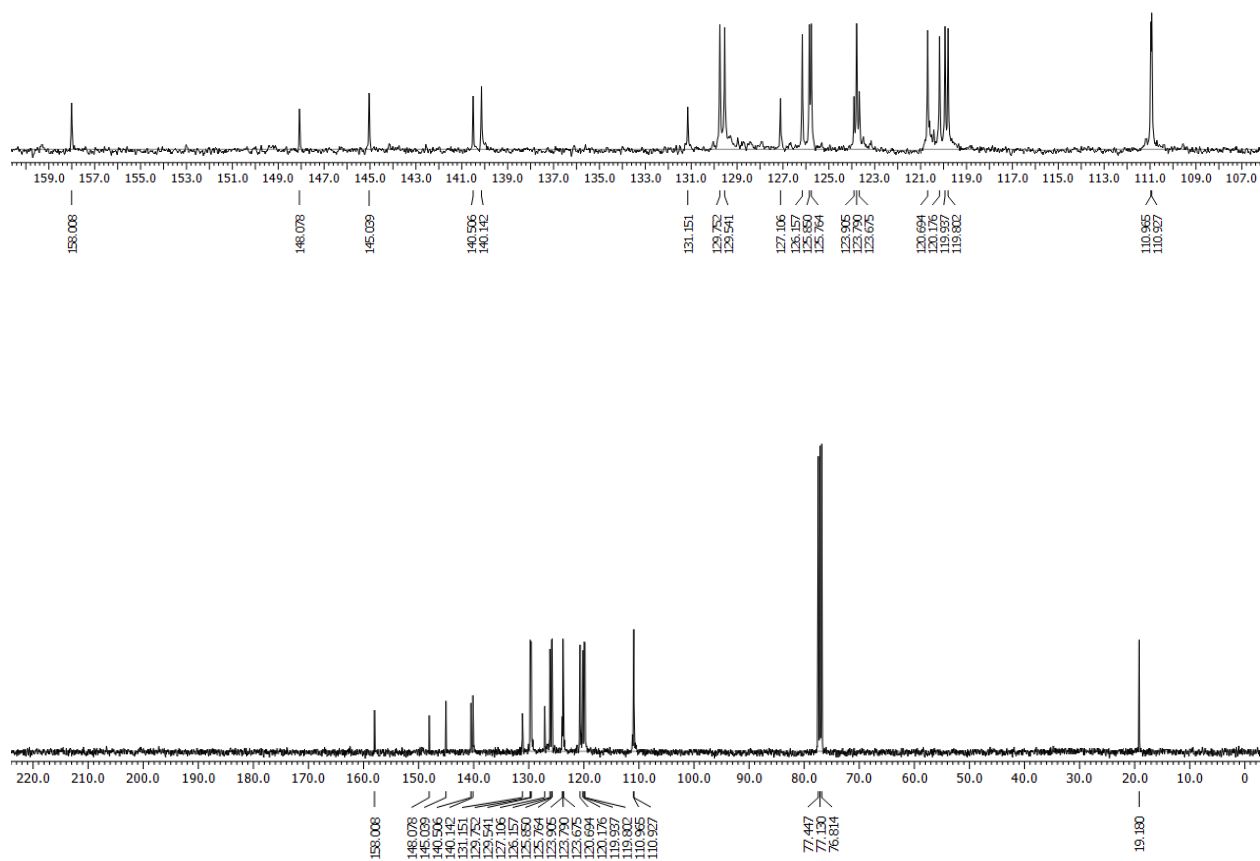

# HRMS

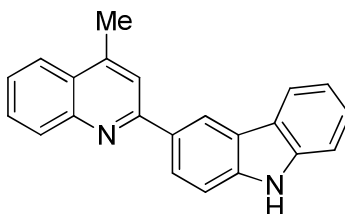

## 3-(4-Methylquinolin-2-yl)-9H-carbazole (3k)

### Qualitative Compound Report

|                        |              |               |                     |
|------------------------|--------------|---------------|---------------------|
| Data File              | VG-CR.d      | Sample Name   | VG-CR               |
| Sample Type            | Sample       | Position      | PI-B9               |
| Instrument Name        | Instrument 1 | User Name     |                     |
| Acq Method             | Damo JK.m    | Acquired Time | 07-08-2019 16:36:18 |
| IRM Calibration Status | Success      | DA Method     | Default.m           |
| Comment                |              |               |                     |

|                |                             |
|----------------|-----------------------------|
| Sample Group   | Info.                       |
| Acquisition SW | 6200 series TOF/6500 series |
| Version        | Q-TOF B.05.01 (B5125.1)     |

#### Compound Table

| Compound Label     | RT    | Mass     | Formula    | MFG Formula | MFG Diff (ppm) | DB Formula |
|--------------------|-------|----------|------------|-------------|----------------|------------|
| Cpd 12: C22 H16 N2 | 0.124 | 308.1335 | C22 H16 N2 | C22 H16 N2  | -6.89          | C22 H16 N2 |

| Compound Label     | m/z      | RT    | Algorithm                 | Mass     |
|--------------------|----------|-------|---------------------------|----------|
| Cpd 12: C22 H16 N2 | 309.1416 | 0.124 | Find by Molecular Feature | 308.1335 |

#### MFE MS Spectrum

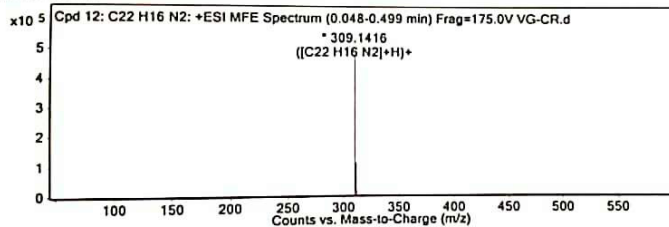

#### MFE MS Zoomed Spectrum

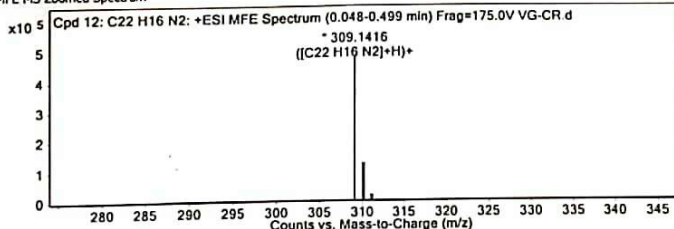

#### MS Spectrum Peak List

| m/z      | z | Abund     | Formula    | Ion    |
|----------|---|-----------|------------|--------|
| 309.1416 | 1 | 487068.72 | C22 H16 N2 | (M+H)+ |
| 310.1404 | 1 | 110861.41 | C22 H16 N2 | (M+H)+ |
| 311.1476 | 1 | 13173.67  | C22 H16 N2 | (M+H)+ |
| 312.1493 | 1 | 458.43    | C22 H16 N2 | (M+H)+ |
| 313.1487 | 1 | 102.64    | C22 H16 N2 | (M+H)+ |

<sup>1</sup>H NMR

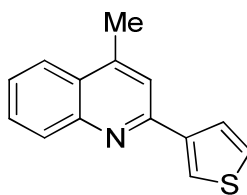

4-Methyl-2-(thiophen-3-yl)quinoline (3l)

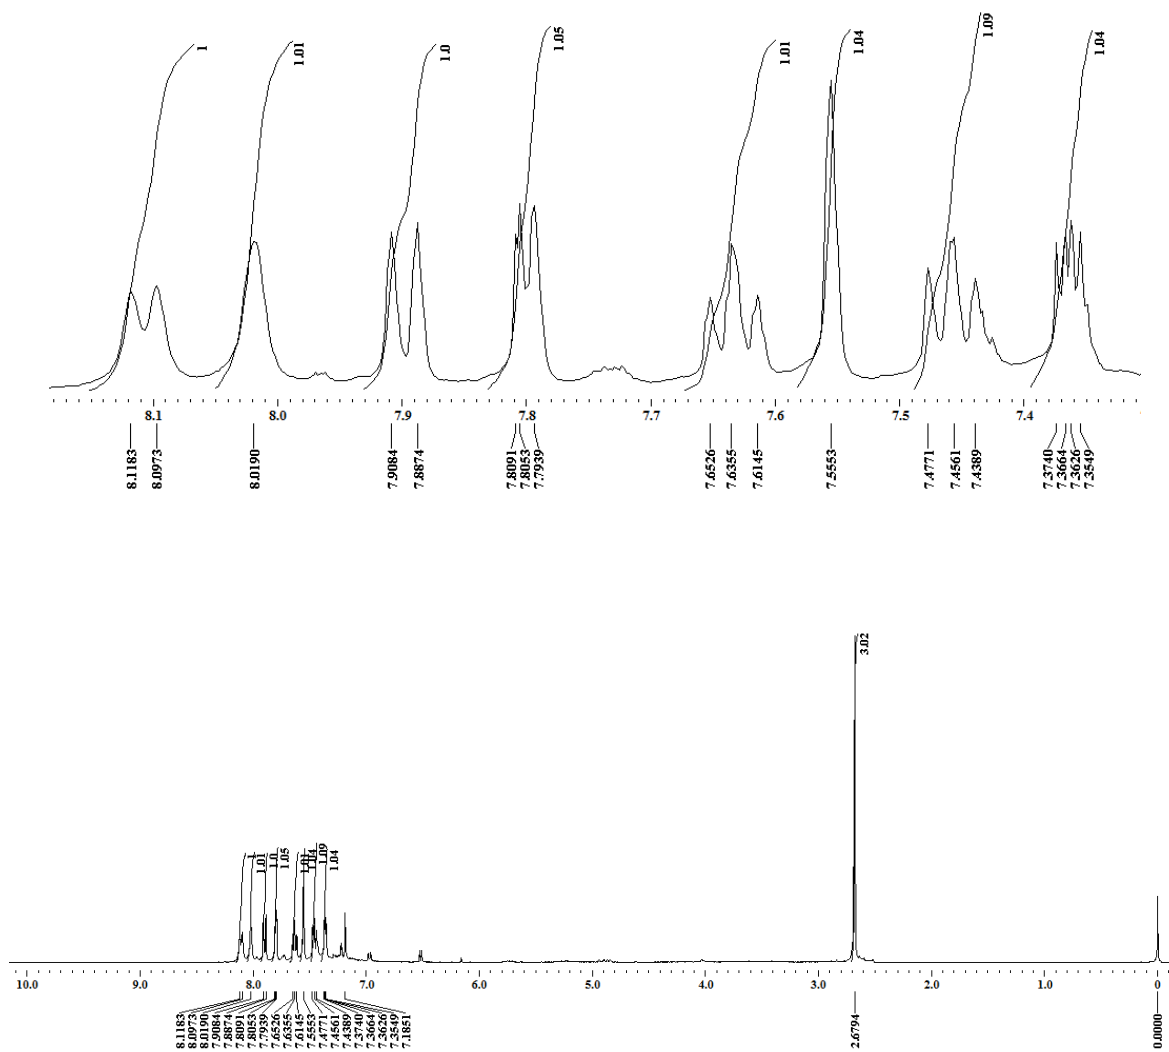



<sup>13</sup>C NMR



4-Methyl-2-(thiophen-3-yl)quinoline (3l)

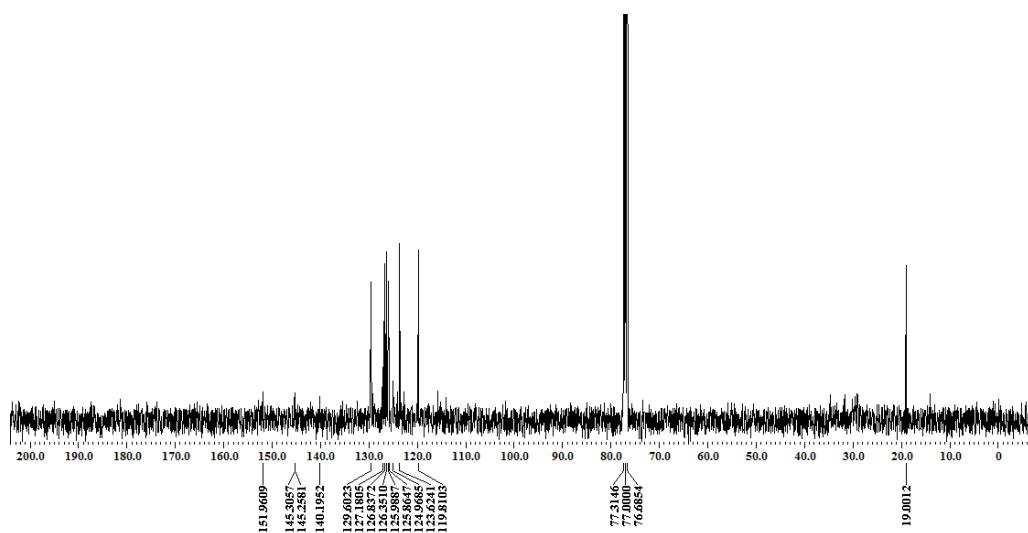

## HRMS

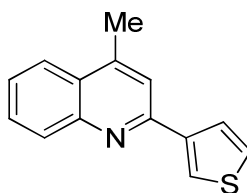

**4-Methyl-2-(thiophen-3-yl)quinoline (3l)**

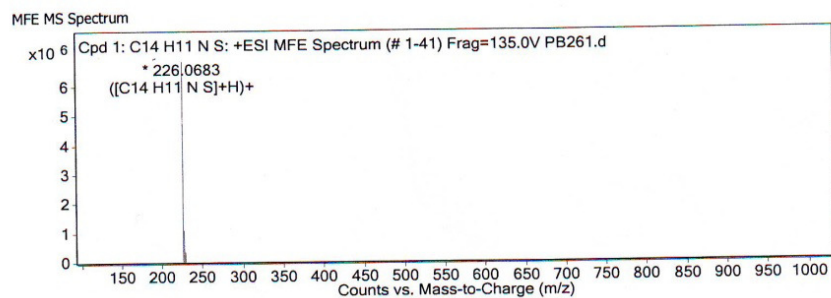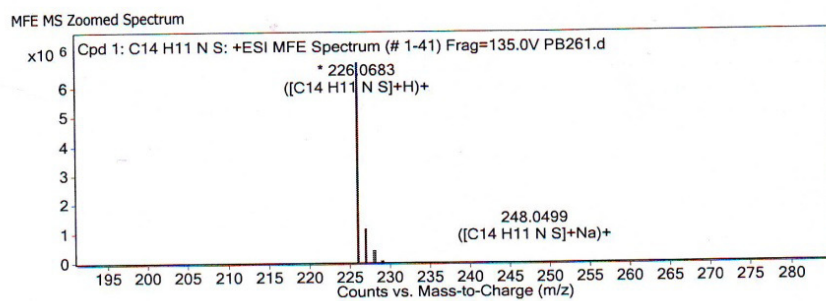

<sup>1</sup>H NMR

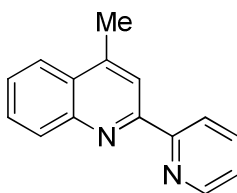

4-Methyl-2-(pyridin-2-yl)quinoline(3m)

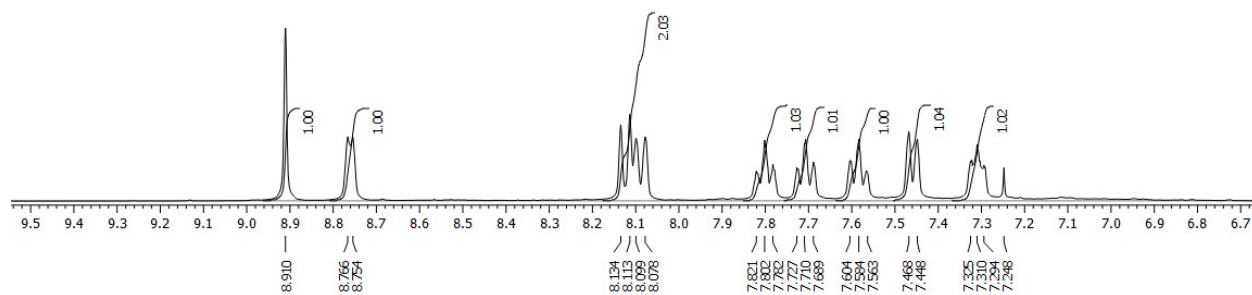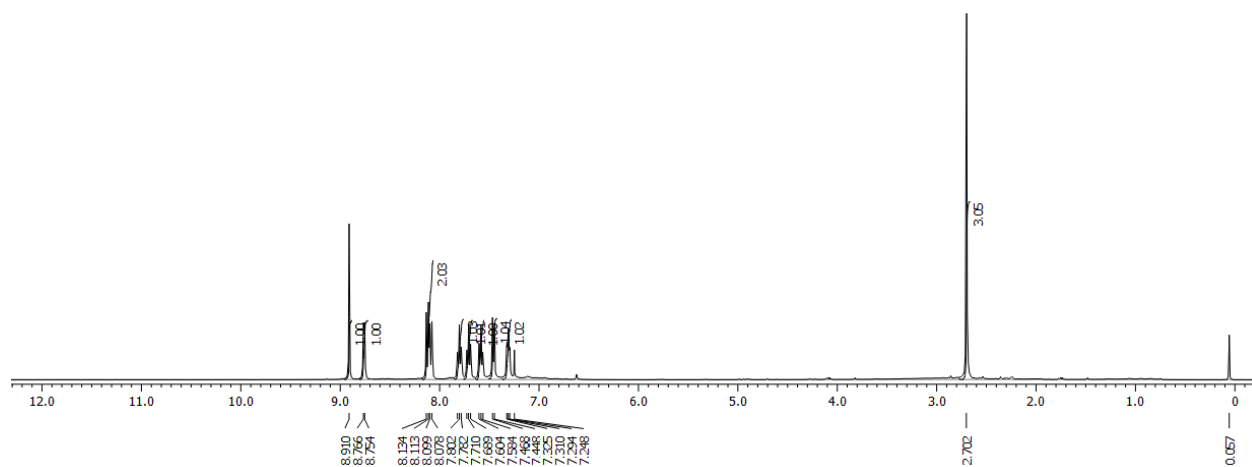

<sup>13</sup>C NMR

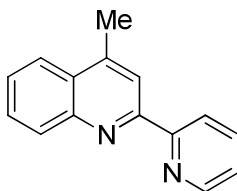

**4-Methyl-2-(pyridin-2-yl)quinoline(3m)**

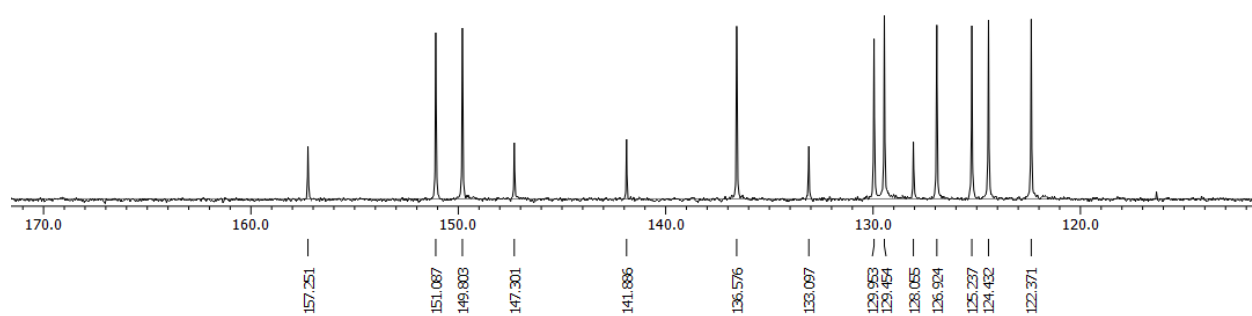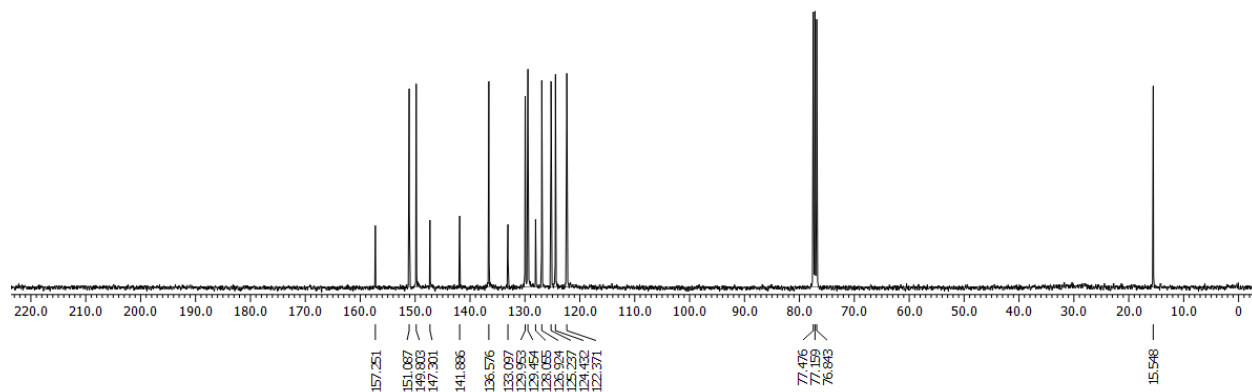

# HRMS

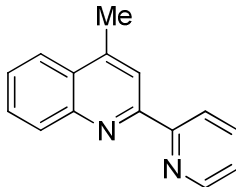

4-Methyl-2-(pyridin-2-yl)quinoline(3m)

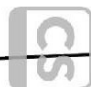

CS  
CamScanner

## Qualitative Compound Report

|                         |              |               |                     |
|-------------------------|--------------|---------------|---------------------|
| Data File               | VG-PY.d      | Sample Name   | VG-PY               |
| Sample Type             | Sample       | Position      | P1-B7               |
| Instrument Name         | Instrument 1 | User Name     |                     |
| Acq Method              | Demo JK.m    | Acquired Time | 07-08-2019 16:16:17 |
| IRMS Calibration Status | Success      | DA Method     | Default.m           |
| Comment                 |              |               |                     |

|                |                             |       |
|----------------|-----------------------------|-------|
| Sample Group   |                             | Info. |
| Acquisition SW | 6200 series TOF/6500 series |       |
| Version        | Q-TOF B.05.01 (B5125.1)     |       |

### Compound Table

| Compound Label     | RT    | Mass     | Formula    | MFG Formula | MFG Diff (ppm) | DB Formula |
|--------------------|-------|----------|------------|-------------|----------------|------------|
| Cpd 24: C15 H12 N2 | 0.104 | 220.1019 | C15 H12 N2 | C15 H12 N2  | -8.29          | C15 H12 N2 |

| Compound Label     | m/z      | RT    | Algorithm                 | Mass     |
|--------------------|----------|-------|---------------------------|----------|
| Cpd 24: C15 H12 N2 | 221.1094 | 0.104 | Find by Molecular Feature | 220.1019 |

### MFE MS Spectrum

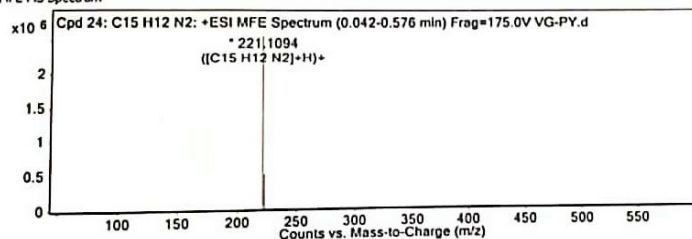

### MFE MS Zoomed Spectrum

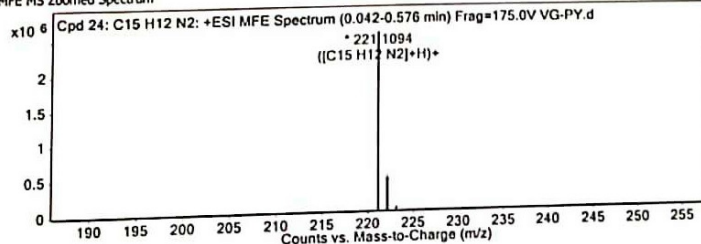

### MS Spectrum Peak List

| m/z      | z | Abund     | Formula    | Ion    |
|----------|---|-----------|------------|--------|
| 221.1094 | 1 | 2565955.5 | C15 H12 N2 | (M+H)+ |
| 222.1113 | 1 | 520961.06 | C15 H12 N2 | (M+H)+ |
| 223.1115 | 1 | 31436.22  | C15 H12 N2 | (M+H)+ |

--- End Of Report ---

<sup>1</sup>H NMR

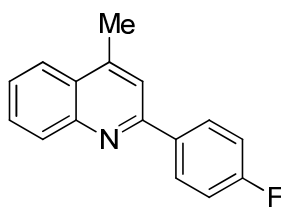

**2-(4-Fluorophenyl)-4-methylquinoline (3n)**

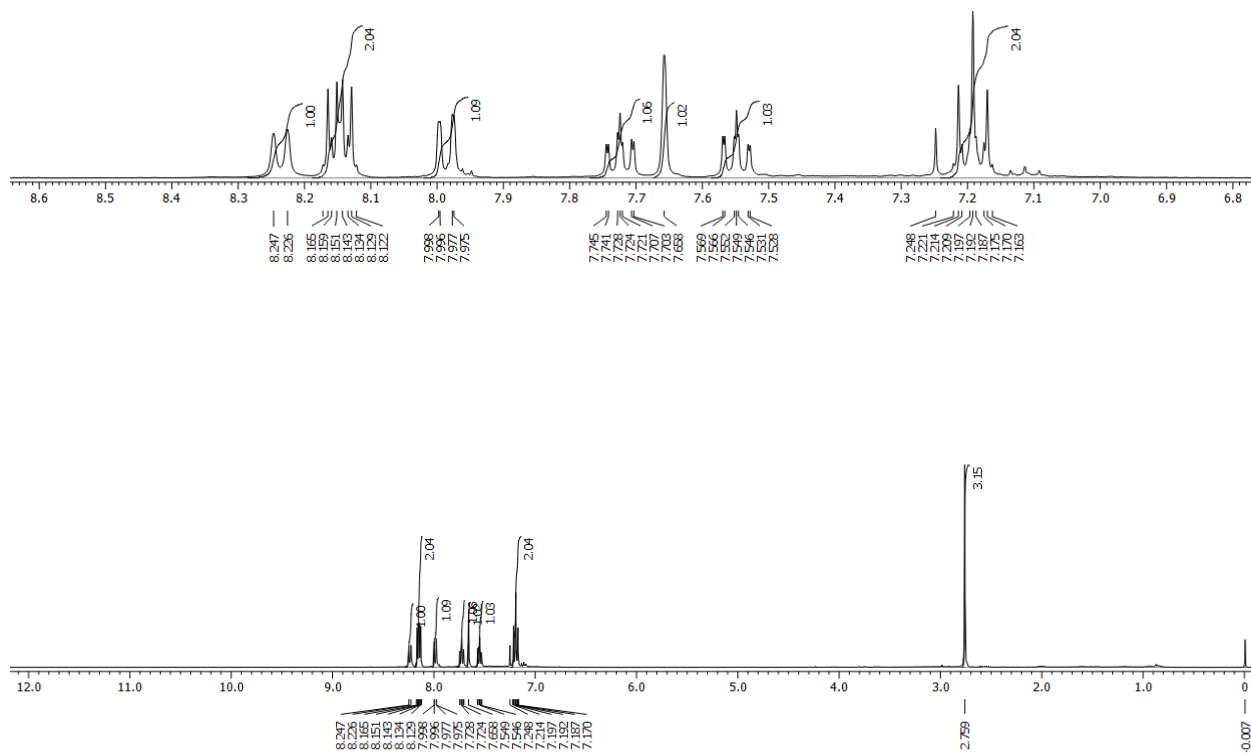

<sup>13</sup>C NMR

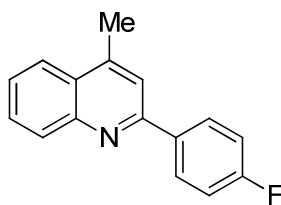

**2-(4-Fluorophenyl)-4-methylquinoline (3n)**

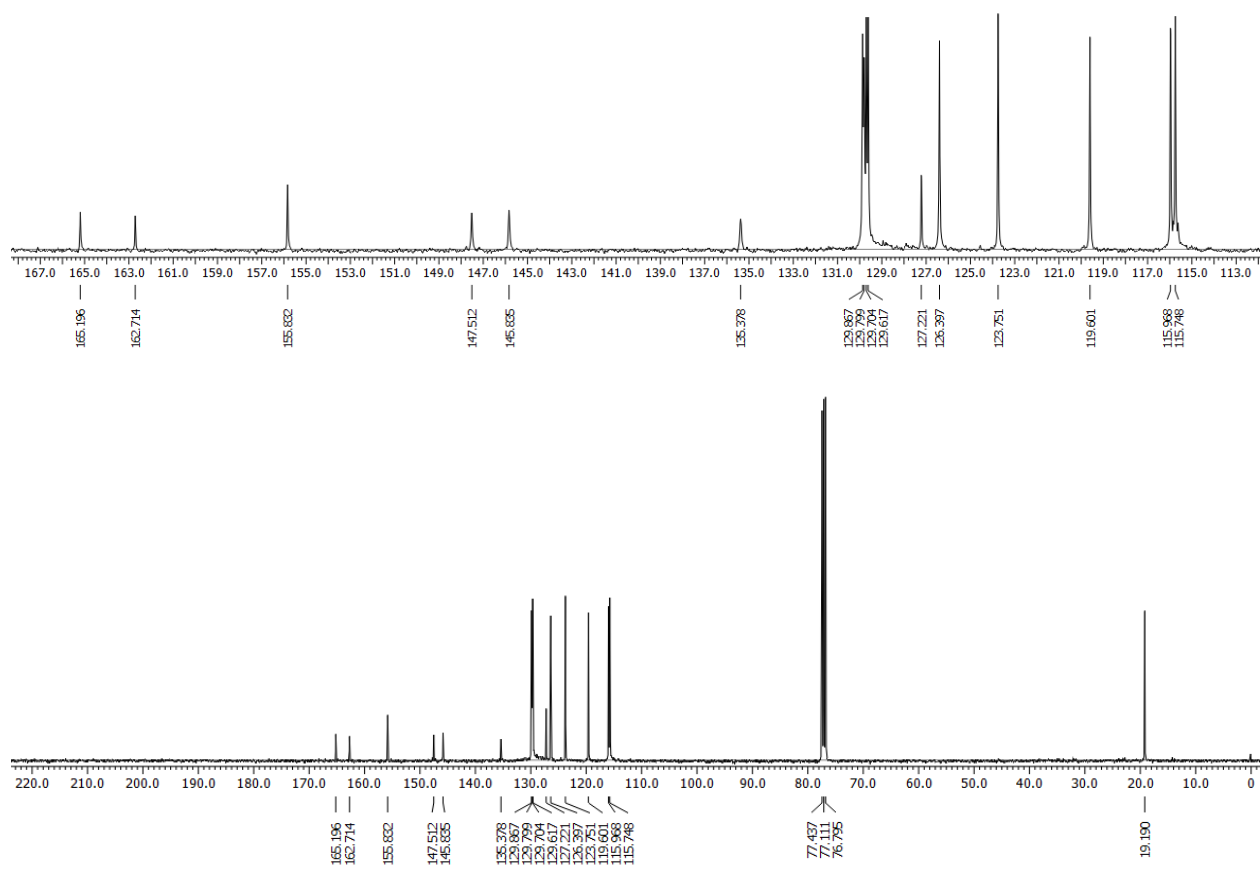

# HRMS

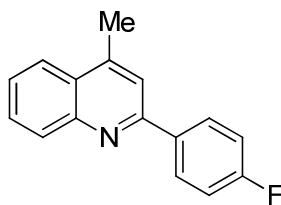

**2-(4-Fluorophenyl)-4-methylquinoline (3n)**

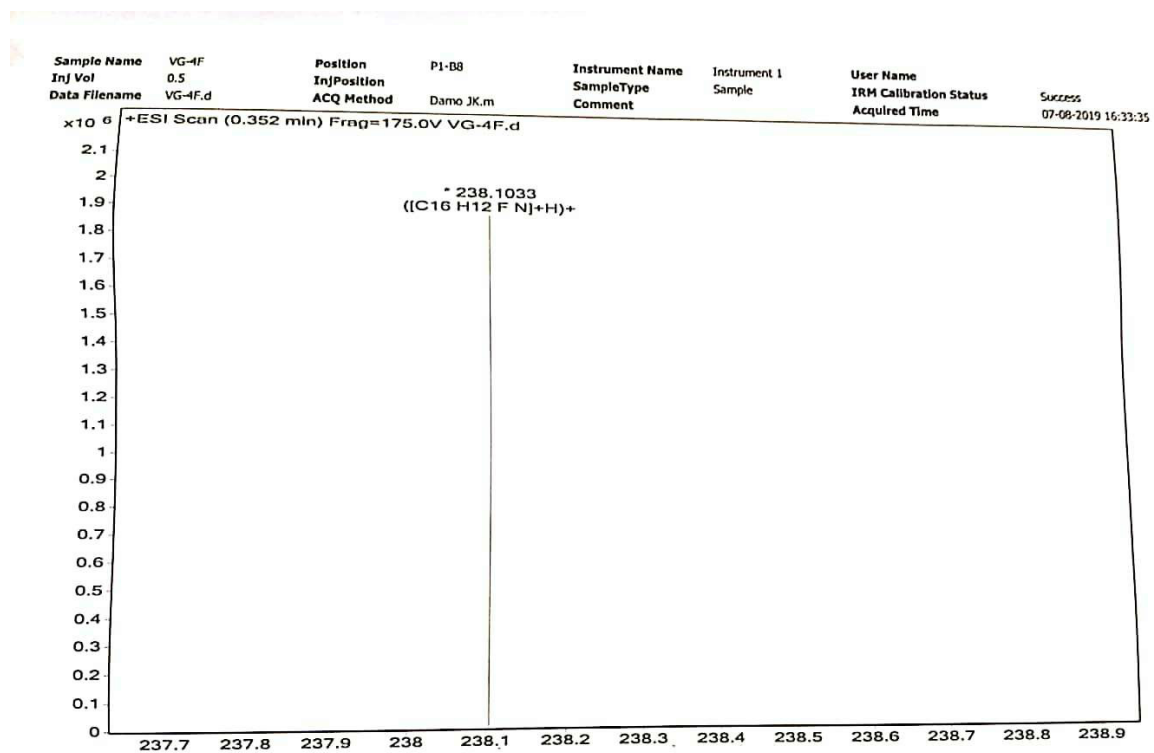



<sup>1</sup>H NMR

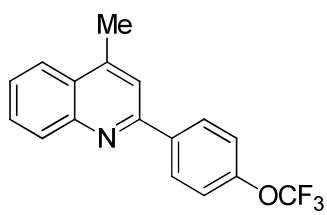

4-Methyl-2-(4-(trifluoromethoxy)phenyl)quinoline (3o)

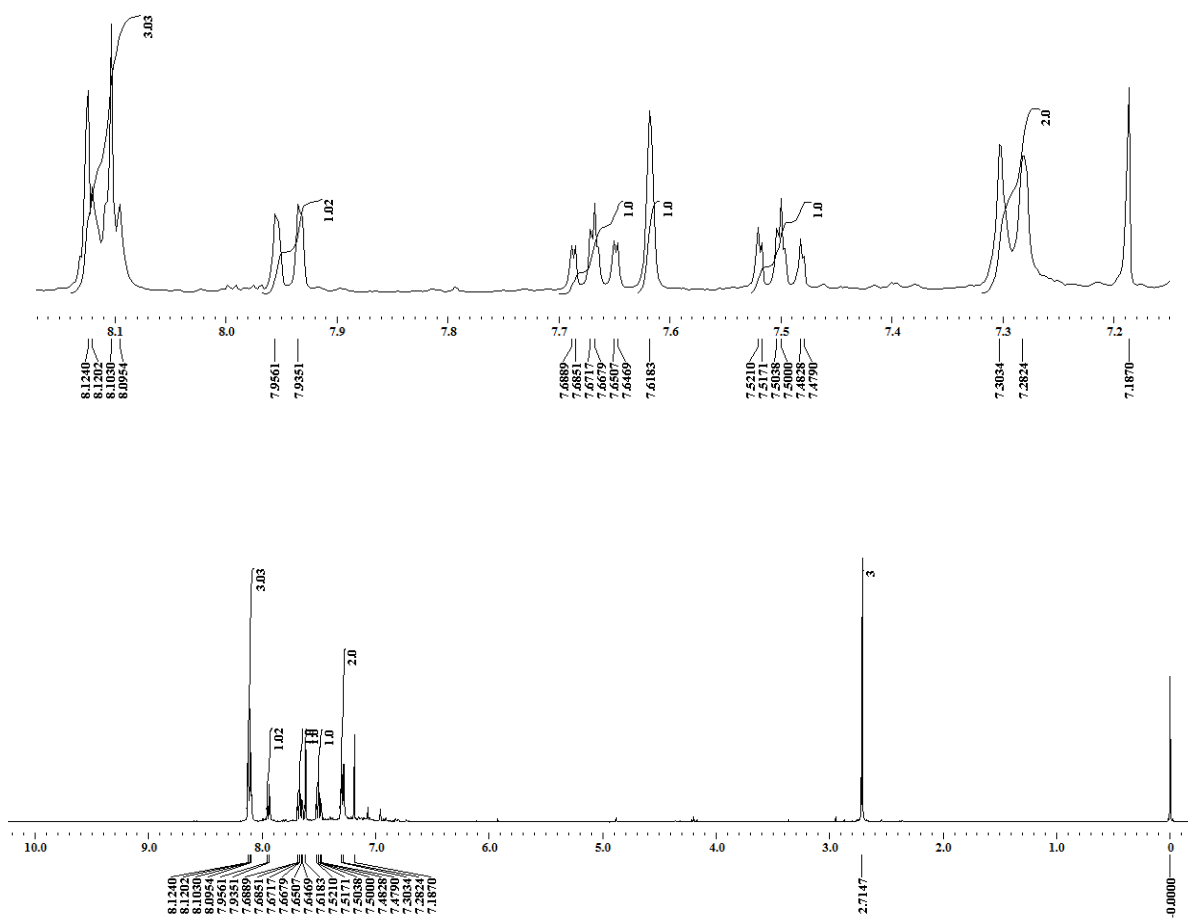

<sup>13</sup>C NMR

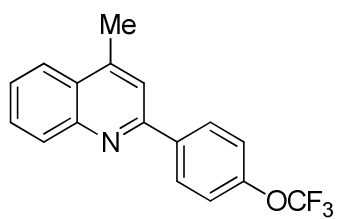

4-Methyl-2-(4-(trifluoromethoxy)phenyl)quinoline (3o)

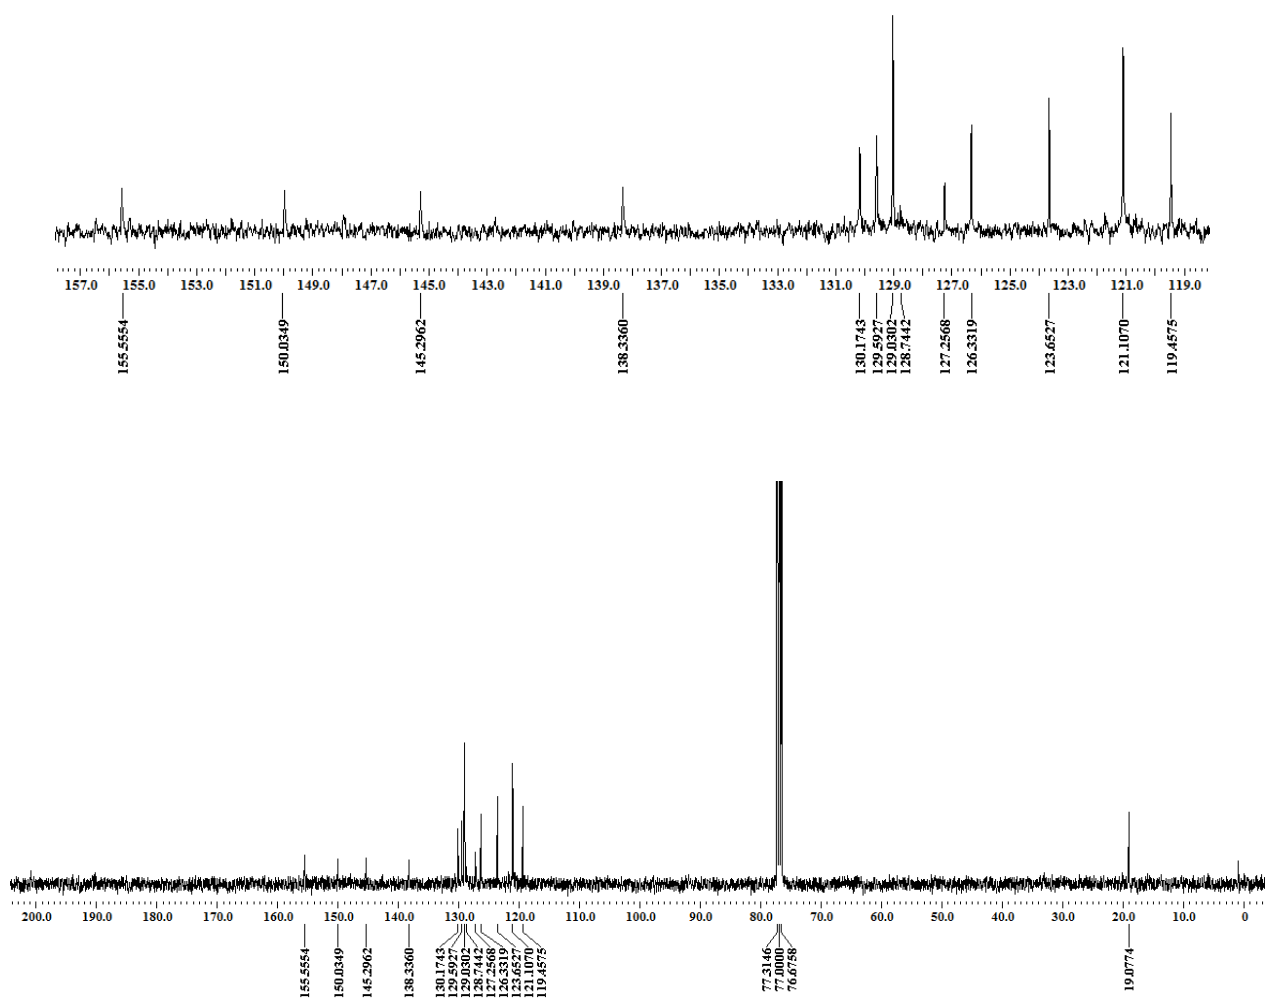

## HRMS

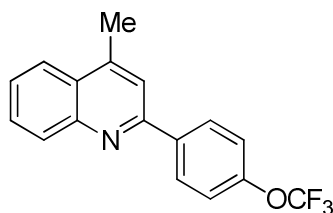

### 4-Methyl-2-(4-(trifluoromethoxy)phenyl)quinoline (3o)

#### Qualitative Compound Report

|                        |              |               |                     |
|------------------------|--------------|---------------|---------------------|
| Data File              | PB-582.d     | Sample Name   | PB-582              |
| Sample Type            | Sample       | Position      | P1-A9               |
| Instrument Name        | Instrument 1 | User Name     |                     |
| Acq Method             | 29.10.2014.m | Acquired Time | 07-03-2017 13:18:24 |
| IRM Calibration Status | Success      | DA Method     | Default.m           |
| Comment                |              |               |                     |

|                |                             |
|----------------|-----------------------------|
| Sample Group   | Info.                       |
| Acquisition SW | 6200 series TOF/6500 series |
| Version        | Q-TOF B.05.01 (B5125)       |

#### Compound Table

| Compound Label        | RT | Mass    | Formula        | MFG Formula    | MFG Diff (ppm) | DB Formula     |
|-----------------------|----|---------|----------------|----------------|----------------|----------------|
| Cpd 2: C17 H12 F3 N O | 10 | 303.088 | C17 H12 F3 N O | C17 H12 F3 N O | -3.11          | C17 H12 F3 N O |

| Compound Label        | m/z      | RT | Algorithm                 | Mass    |
|-----------------------|----------|----|---------------------------|---------|
| Cpd 2: C17 H12 F3 N O | 304.0953 | 10 | Find by Molecular Feature | 303.088 |

#### MFE MS Spectrum

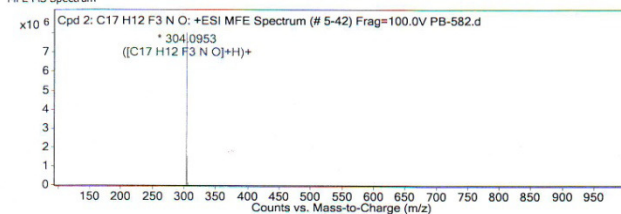

#### MFE MS Zoomed Spectrum

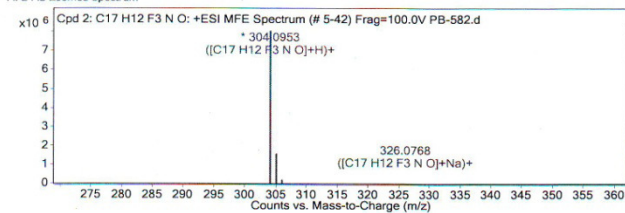

#### MS Spectrum Peak List

| m/z      | z | Abund      | Formula        | Ion     |
|----------|---|------------|----------------|---------|
| 304.0953 | 1 | 8053164    | C17 H12 F3 N O | (M+H)+  |
| 305.0987 | 1 | 1515288.54 | C17 H12 F3 N O | (M+H)+  |
| 306.1014 | 1 | 144385.39  | C17 H12 F3 N O | (M+H)+  |
| 307.1039 | 1 | 9519.53    | C17 H12 F3 N O | (M+H)+  |
| 308.103  | 1 | 800.3      | C17 H12 F3 N O | (M+H)+  |
| 326.0768 | 1 | 5025.82    | C17 H12 F3 N O | (M+Na)+ |
| 327.08   | 1 | 1384.43    | C17 H12 F3 N O | (M+Na)+ |

--- End Of Report ---

<sup>1</sup>H NMR

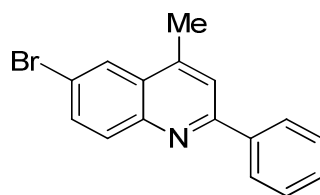

**6-Bromo-4-methyl-2-phenylquinoline (4a)**

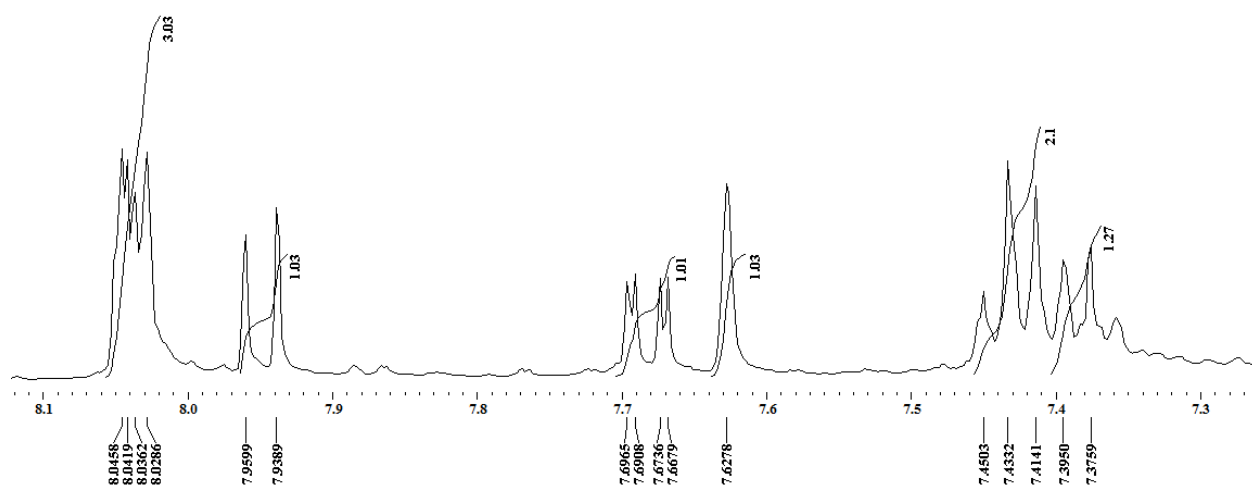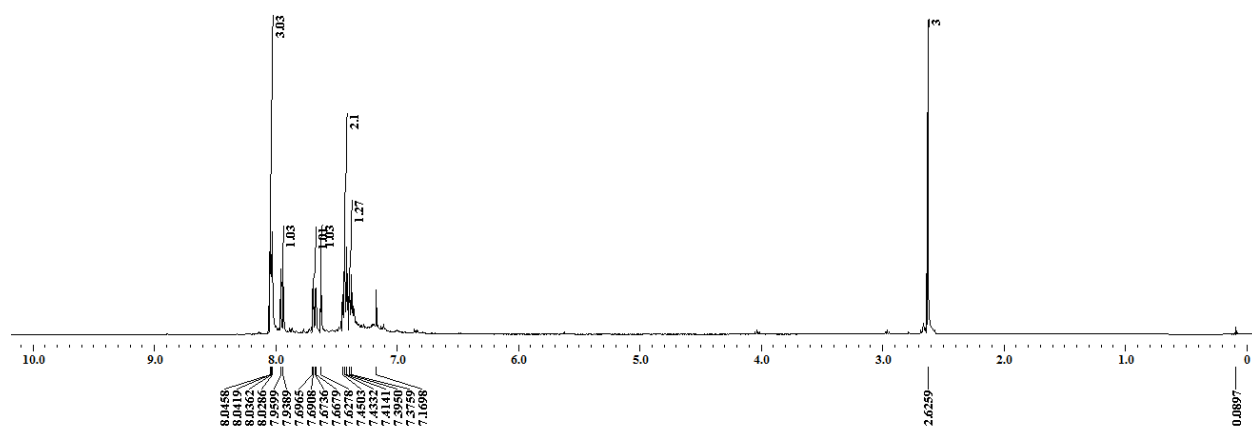

<sup>13</sup>C NMR

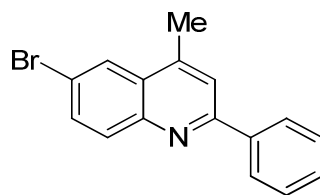

**6-Bromo-4-methyl-2-phenylquinoline (4a)**

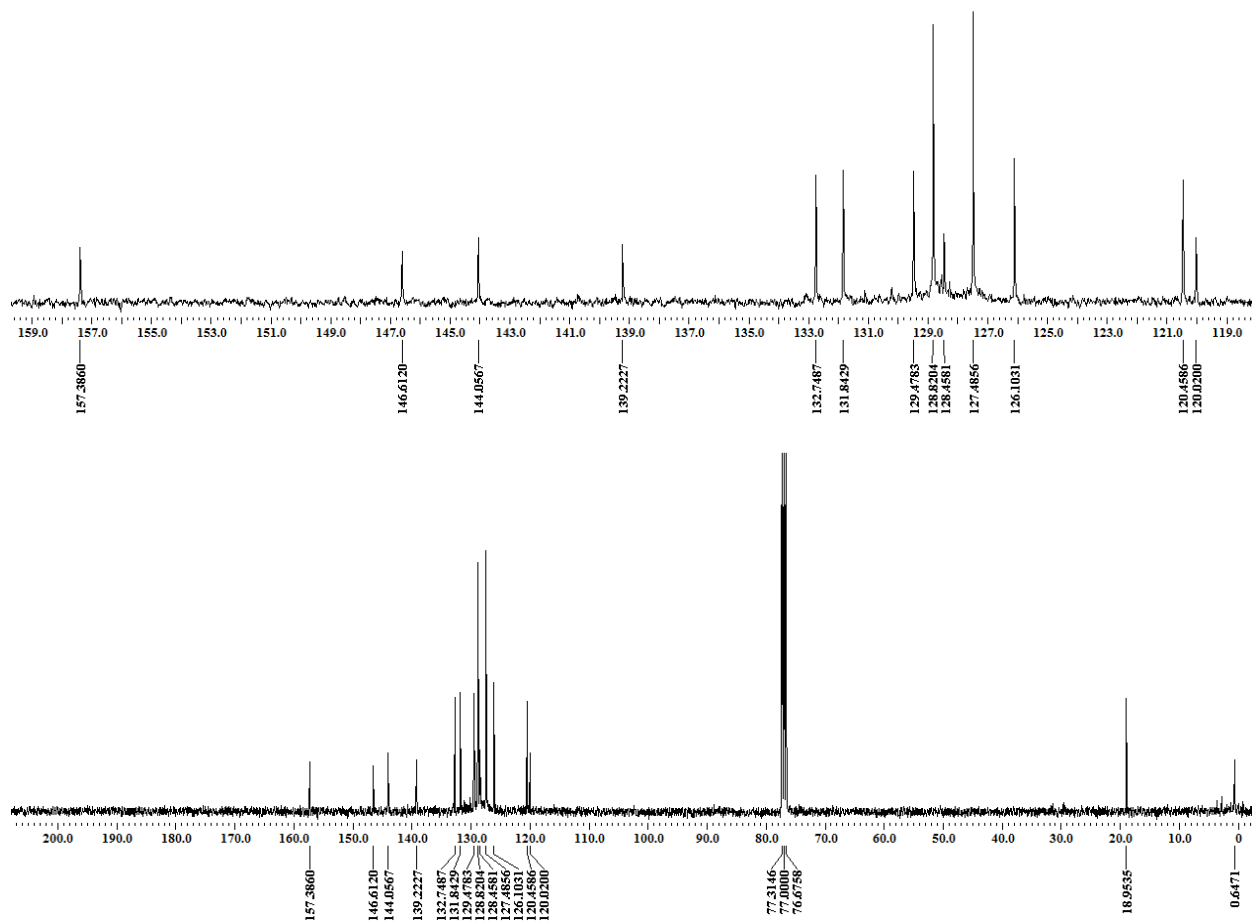

## HRMS

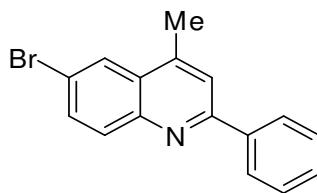

**6-Bromo-4-methyl-2-phenylquinoline (4a)**

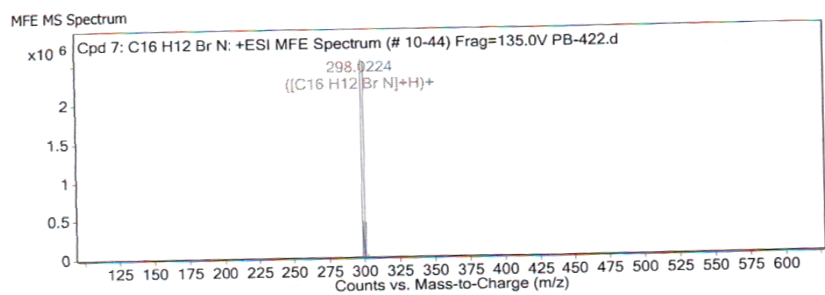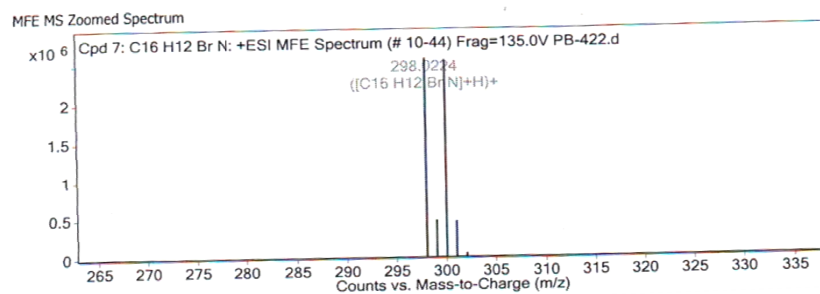

<sup>1</sup>H NMR

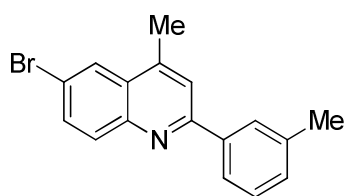

6-Bromo-4-methyl-2-(*m*-tolyl)quinoline (4b)

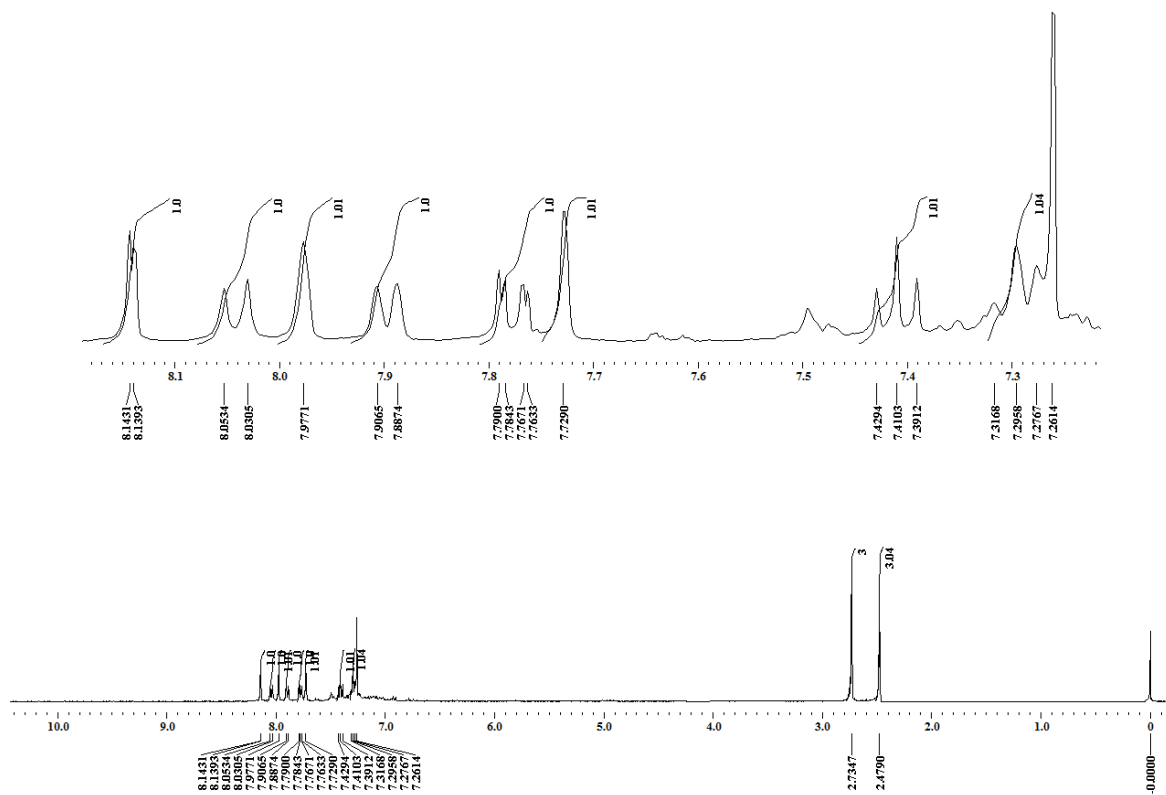

<sup>13</sup>C NMR



6-Bromo-4-methyl-2-(*m*-tolyl)quinoline (4b)

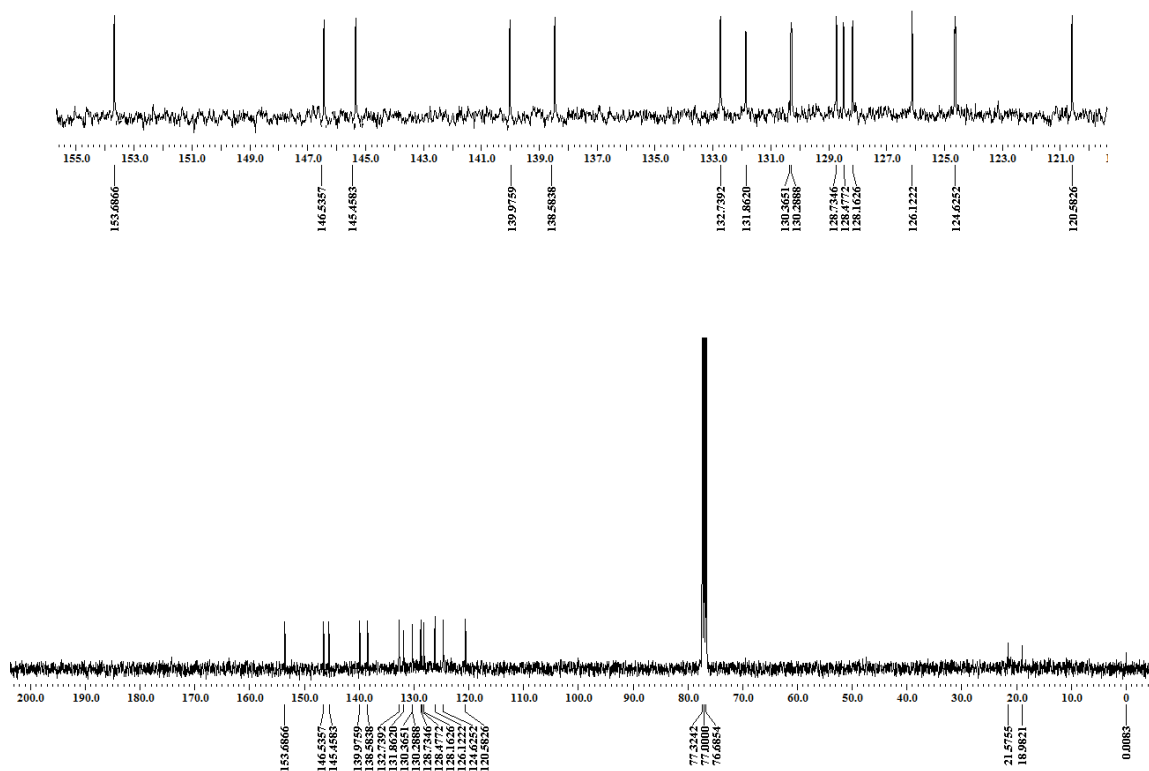



## HRMS

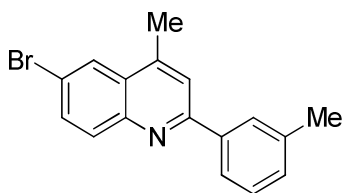

**6-Bromo-4-methyl-2-(*m*-tolyl)quinoline (4b)**

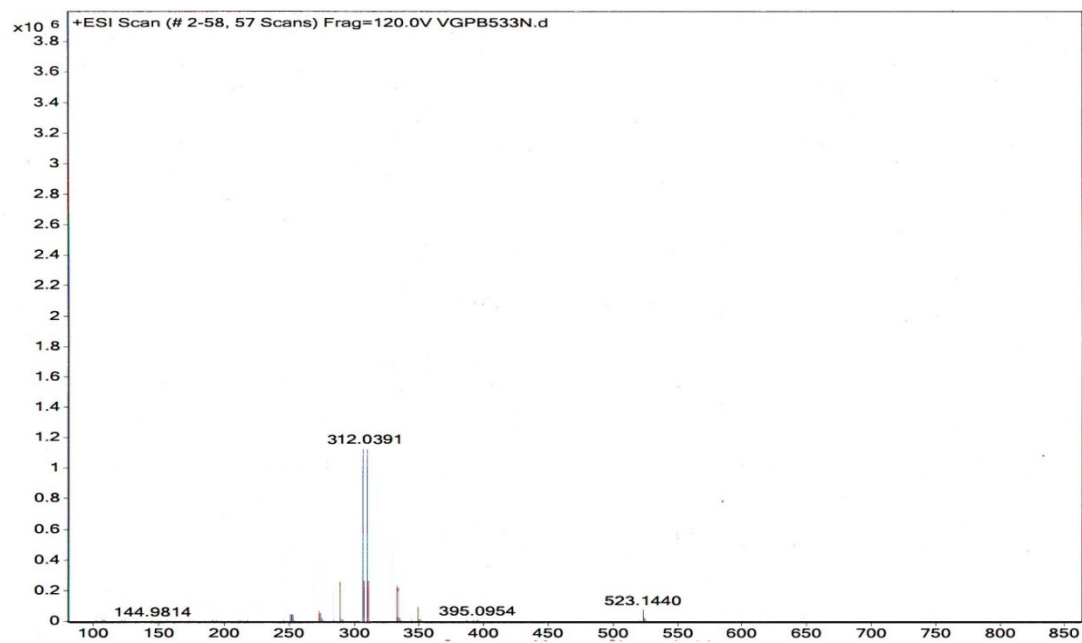

<sup>1</sup>H NMR

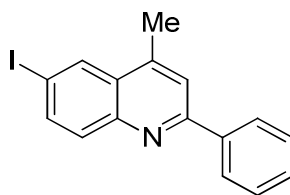

**6-Iodo-4-methyl-2-phenylquinoline (4c)**

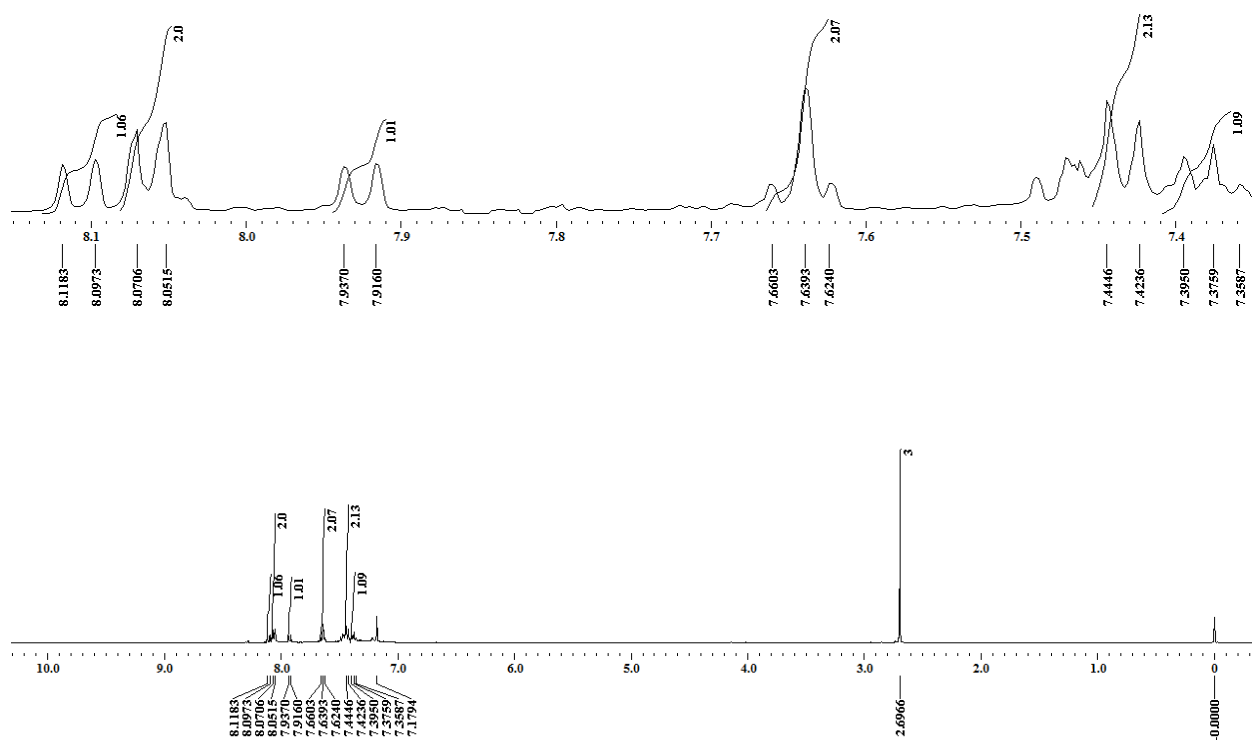

<sup>13</sup>C NMR



**6-Iodo-4-methyl-2-phenylquinoline (4c)**

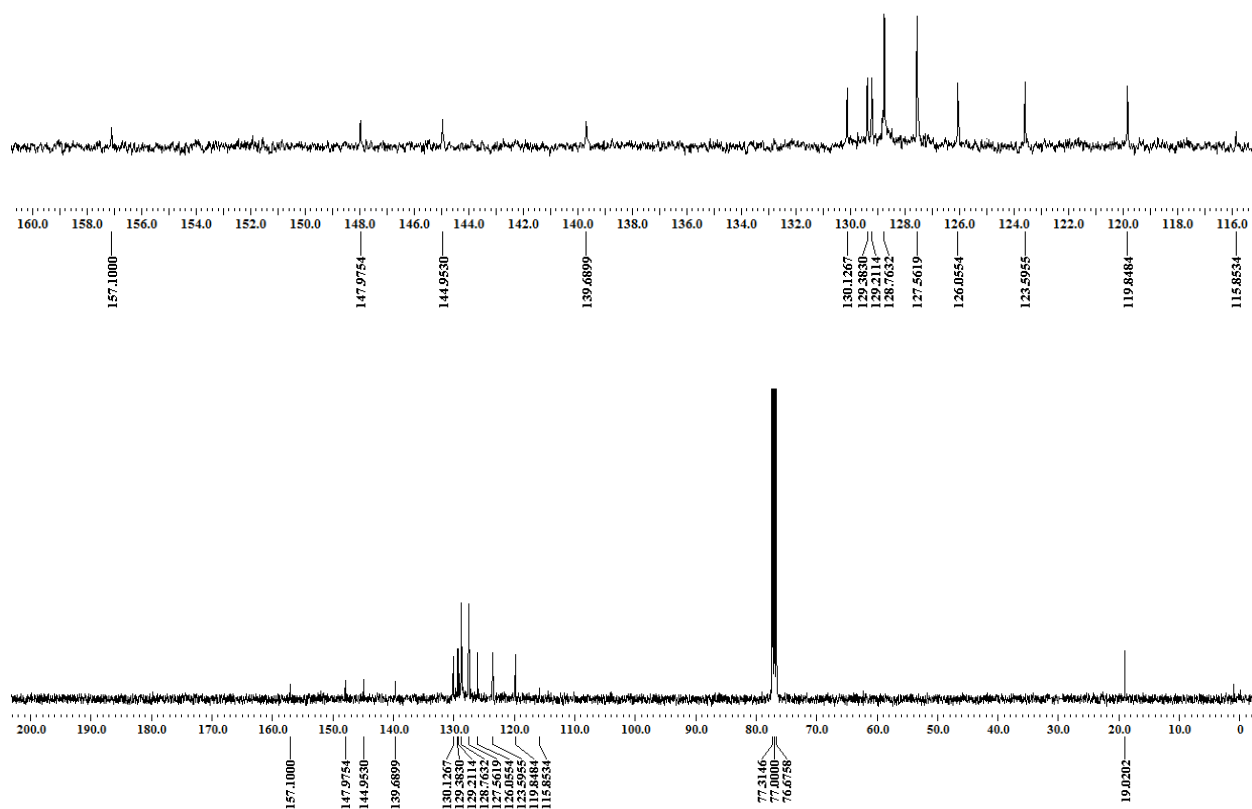

## HRMS

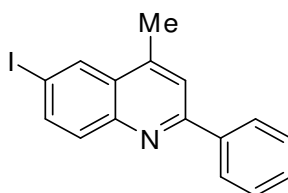

**6-Iodo-4-methyl-2-phenylquinoline (4c)**

MFE MS Spectrum

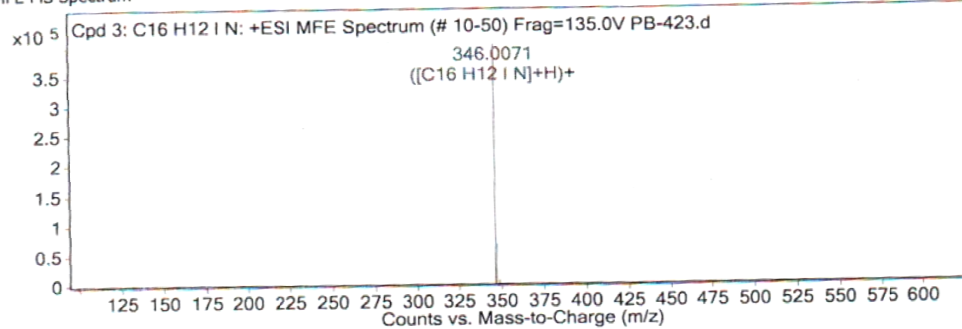

MFE MS Zoomed Spectrum

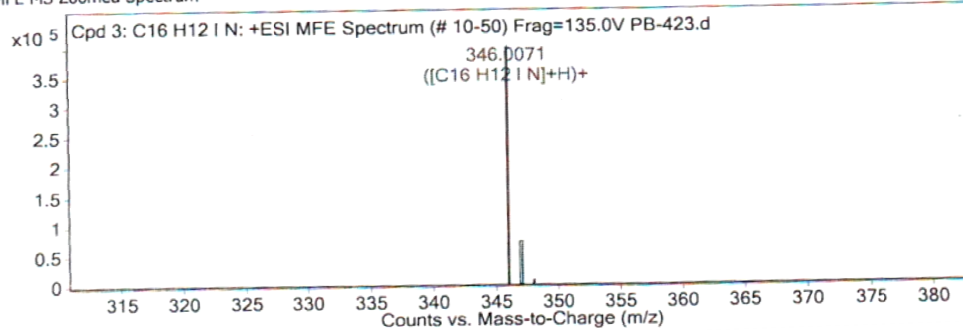

<sup>1</sup>H NMR

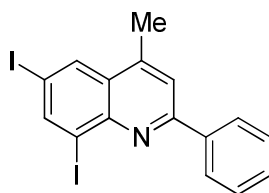

6, 8-Diiodo-4-methyl-2-phenylquinoline (4d)

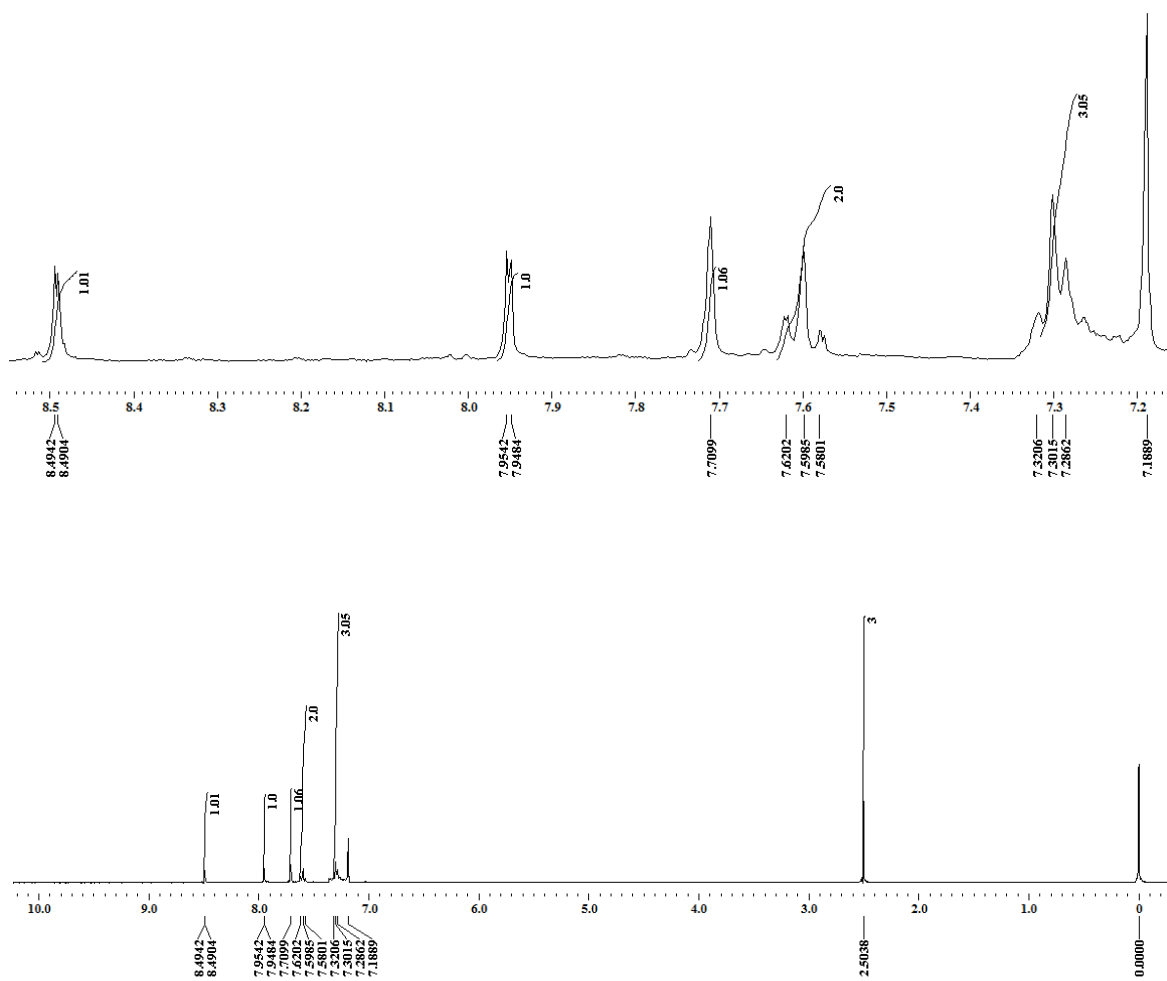

<sup>13</sup>C NMR



**6, 8-Diiodo-4-methyl-2-phenylquinoline (4d)**

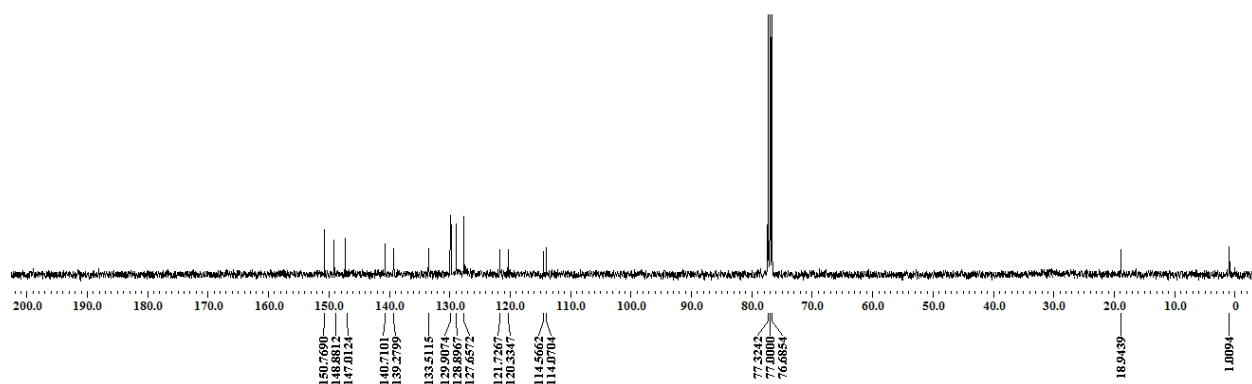

## HRMS



**6,8-Diiodo-4-methyl-2-phenylquinoline (4d)**

MFE MS Spectrum

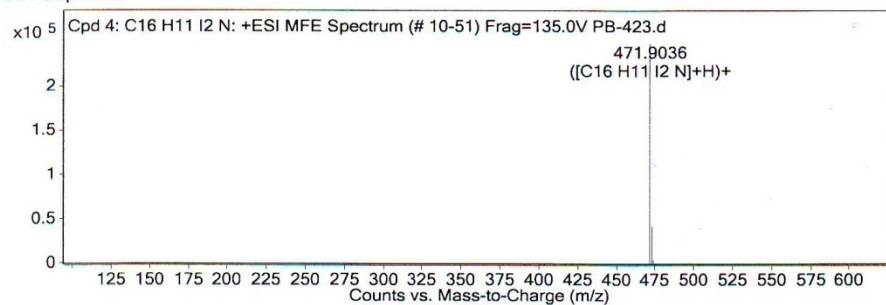

MFE MS Zoomed Spectrum

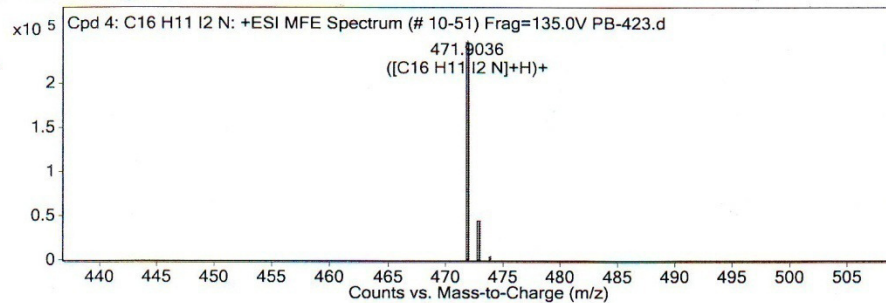

<sup>1</sup>H NMR

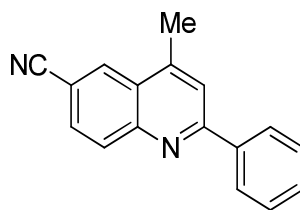

4-Methyl-2-phenylquinoline-6-carbonitrile (4e)

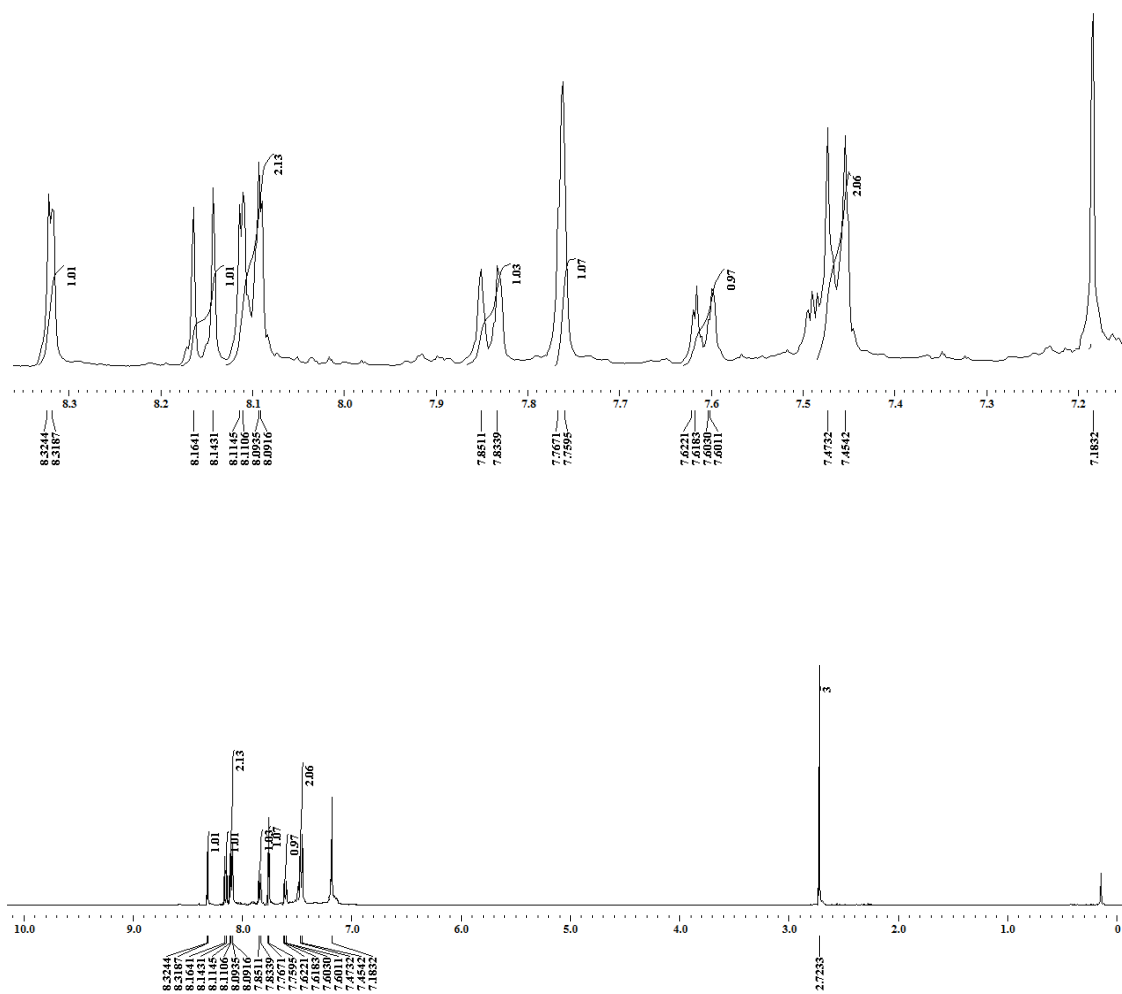



<sup>13</sup>C NMR

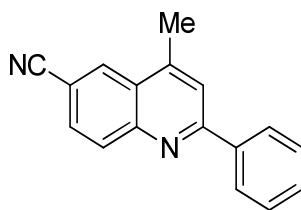

4-Methyl-2-phenylquinoline-6-carbonitrile (4e)

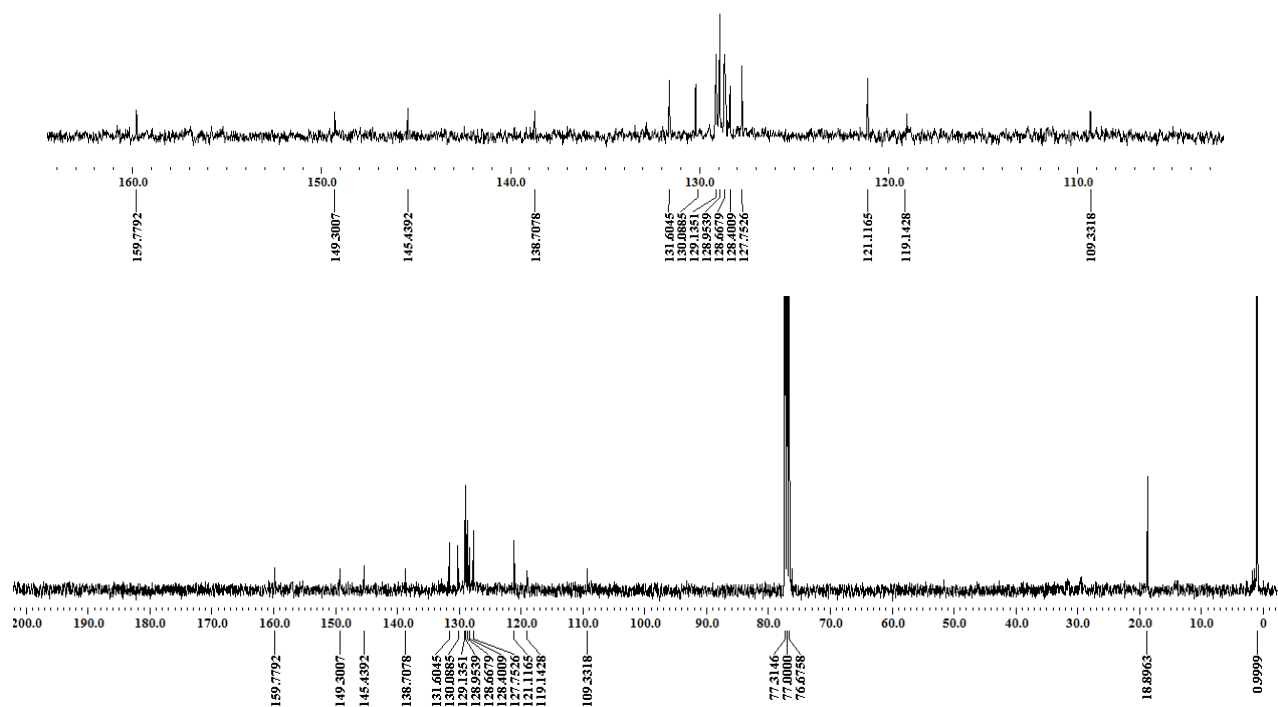

## HRMS



**4-Methyl-2-phenylquinoline-6-carbonitrile (4e)**

MFE MS Spectrum

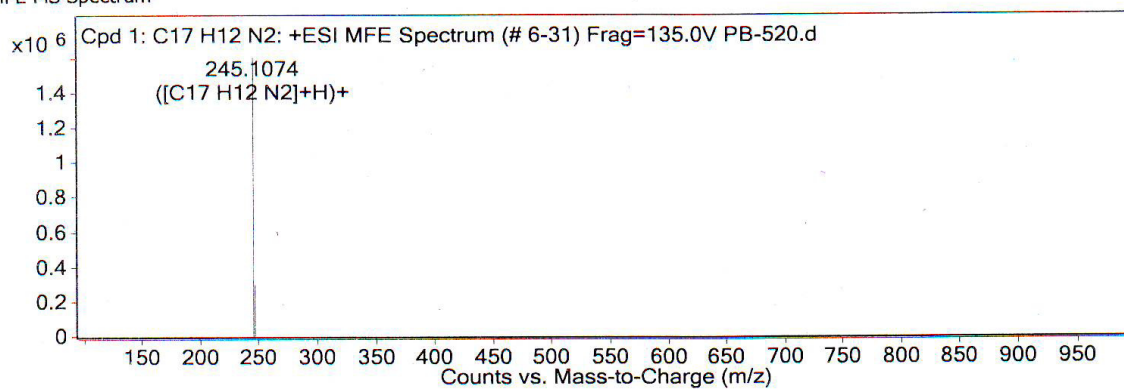

MFE MS Zoomed Spectrum

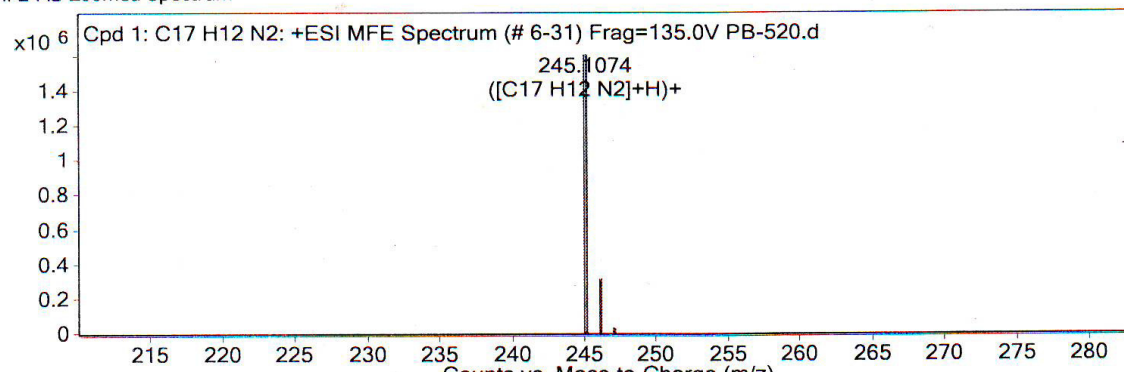

<sup>1</sup>H NMR

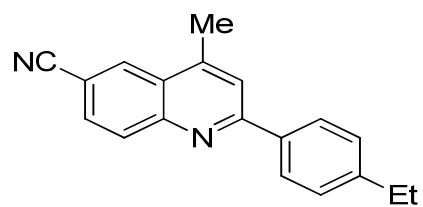

2-(4-Ethylphenyl)-4-methylquinoline-6-carbonitrile (4f)

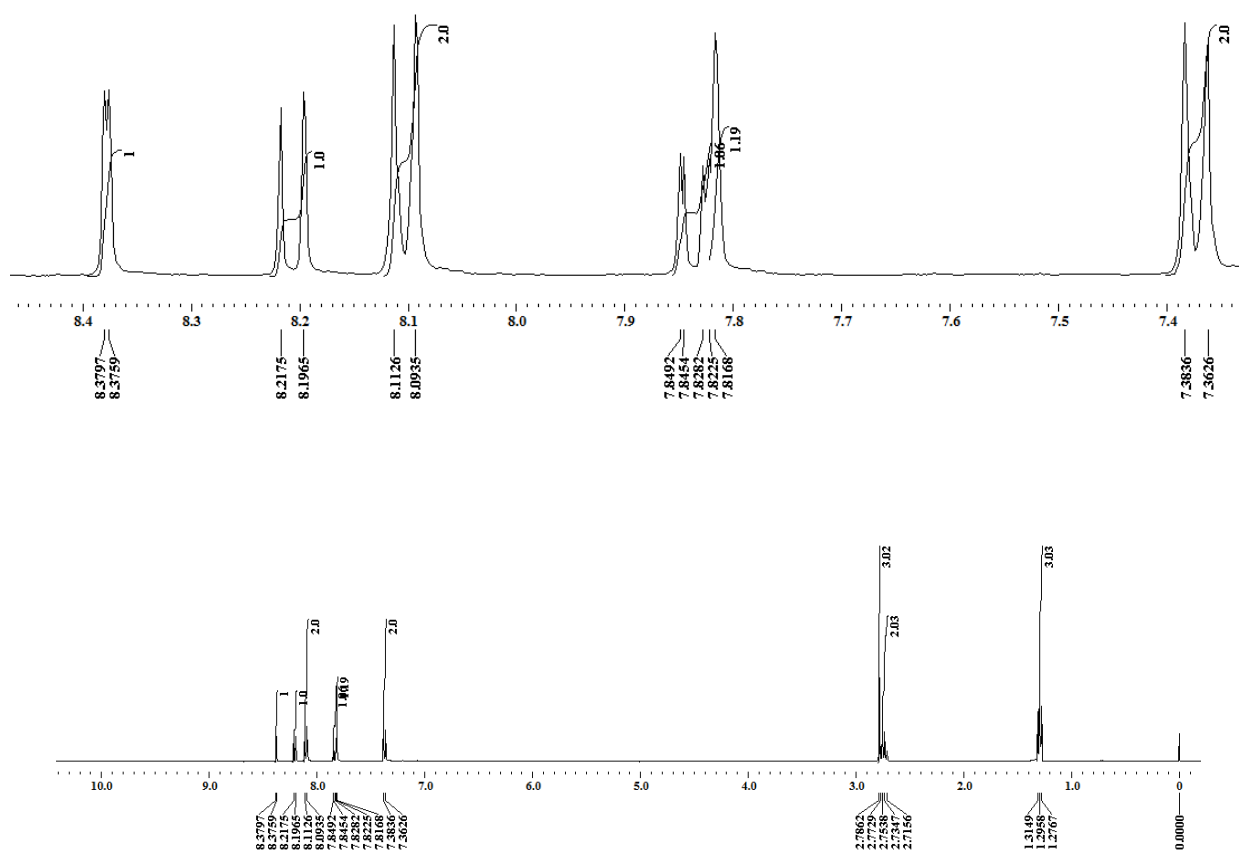

<sup>13</sup>C NMR

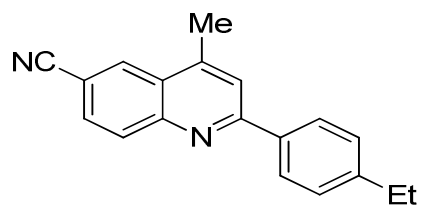

2-(4-Ethylphenyl)-4-methylquinoline-6-carbonitrile (4f)

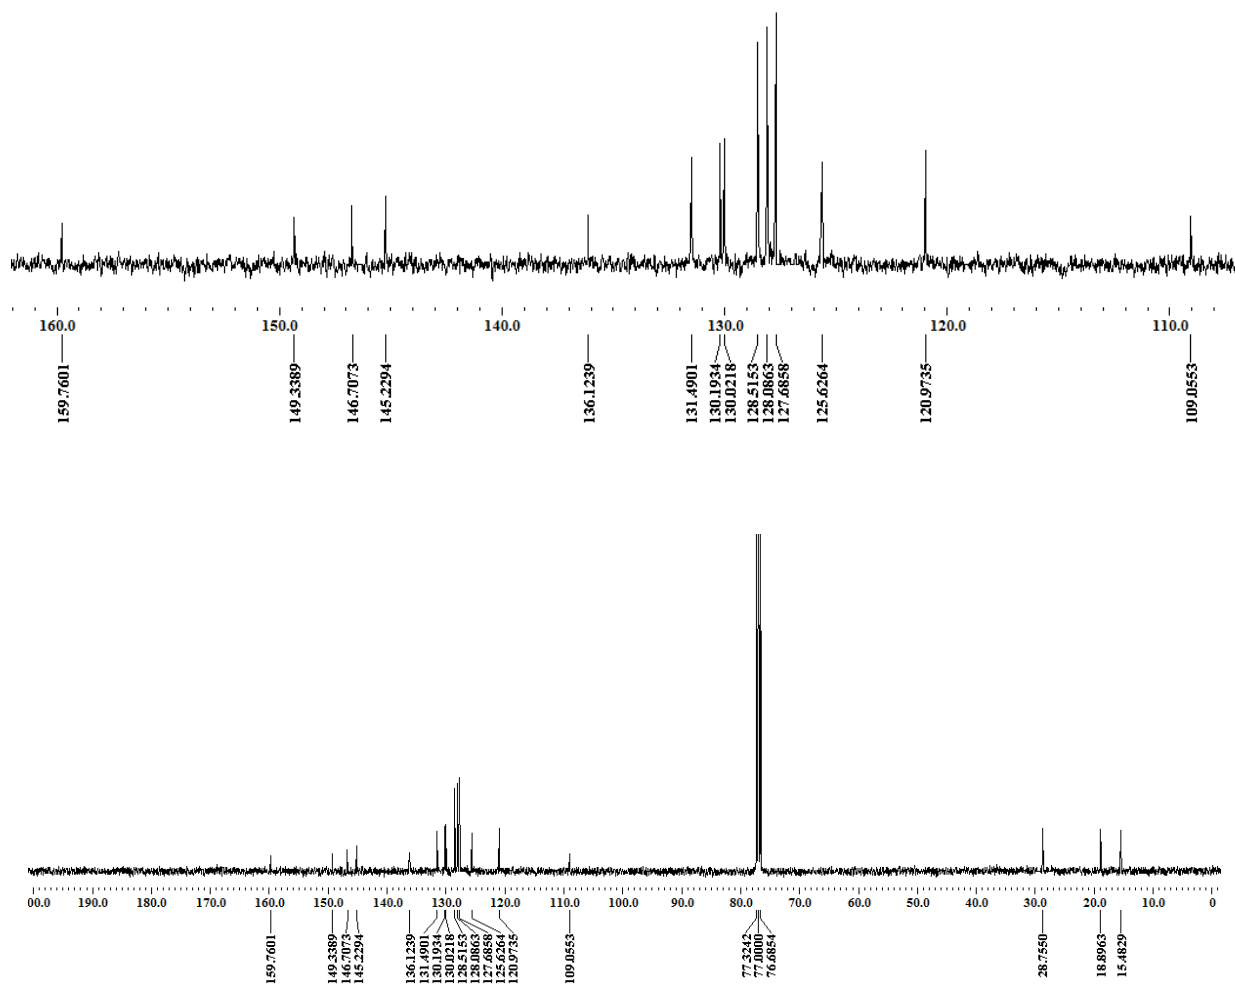

# HRMS

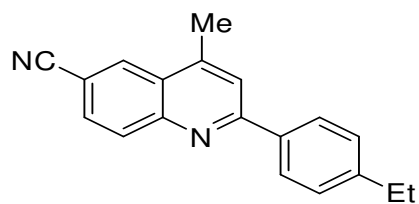

**2-(4-Ethylphenyl)-4-methylquinoline-6-carbonitrile (4f)**

MFE MS Spectrum

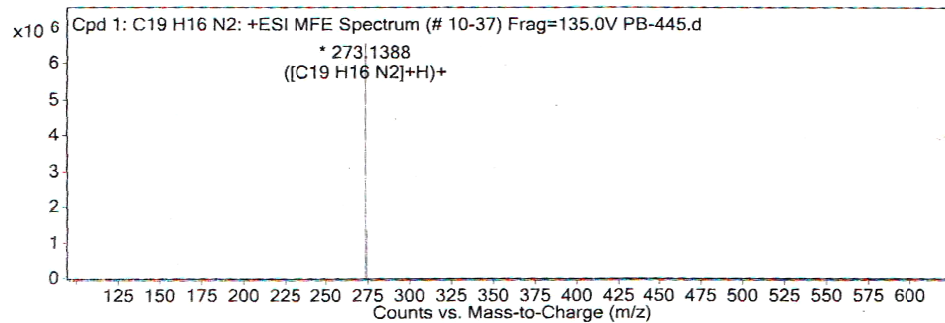

MFE MS Zoomed Spectrum

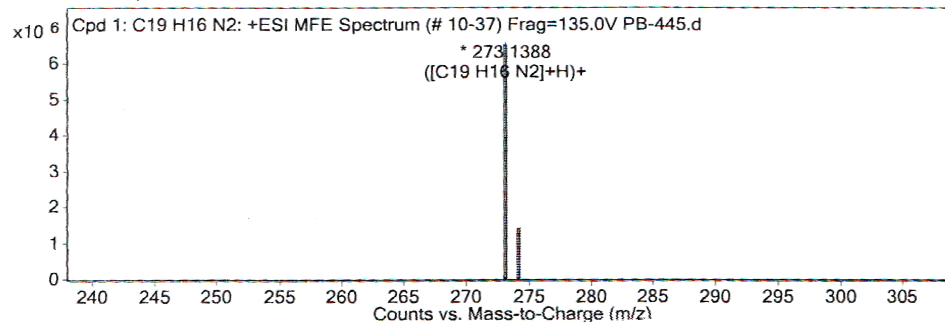

<sup>1</sup>H NMR

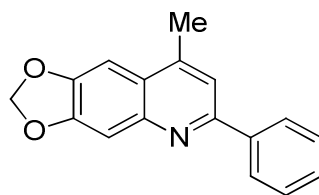

8-Methyl-6-phenyl-[1,3]dioxolo[4,5-g]quinoline (4g)

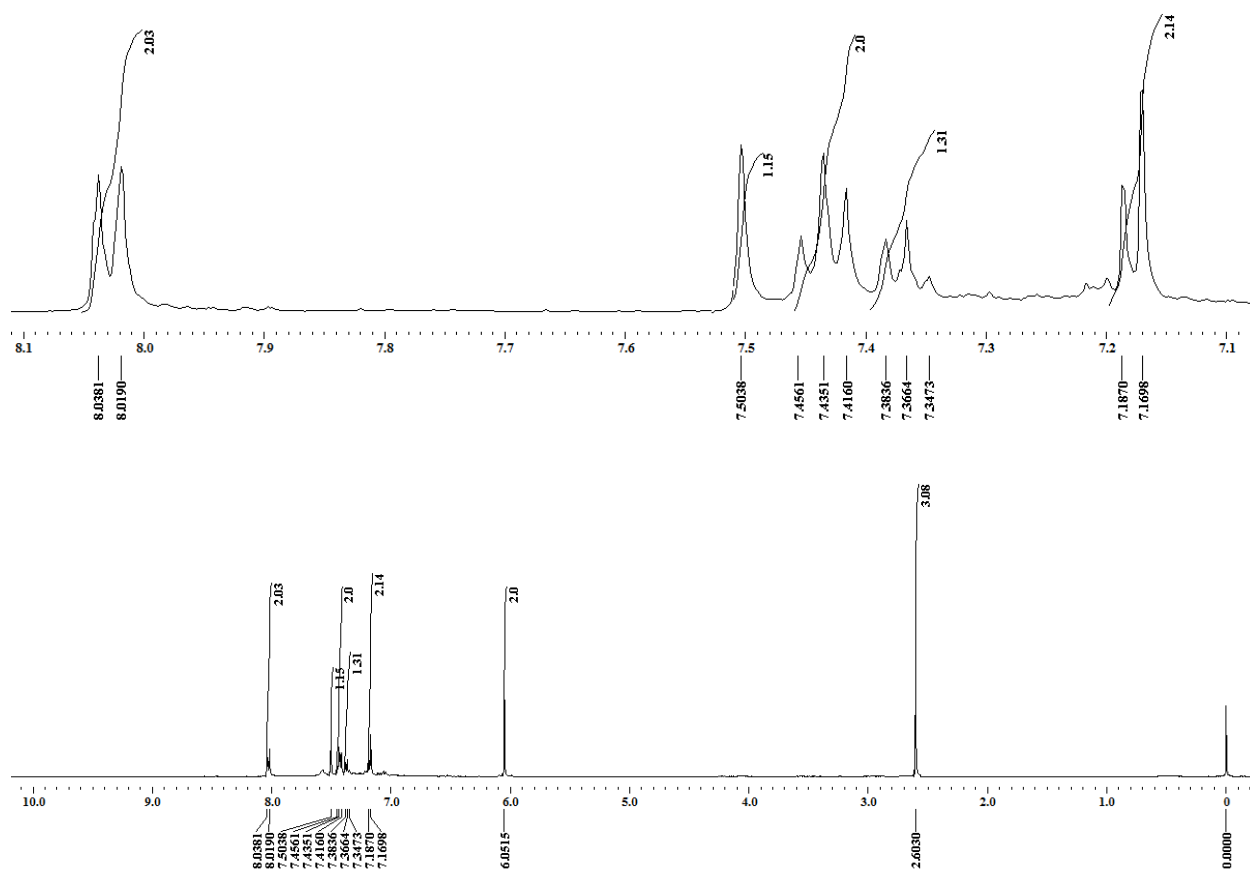

<sup>13</sup>C NMR



8-Methyl-6-phenyl-[1,3]dioxolo[4,5-g]quinoline (4g)

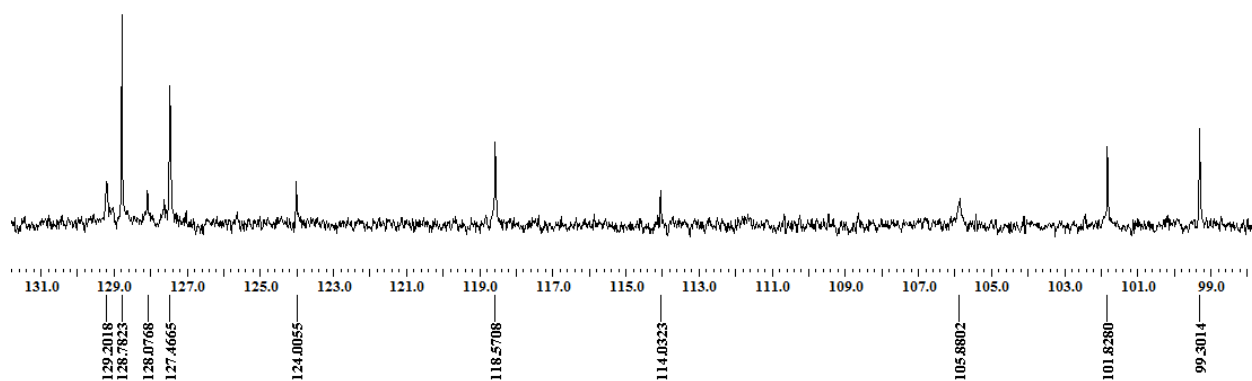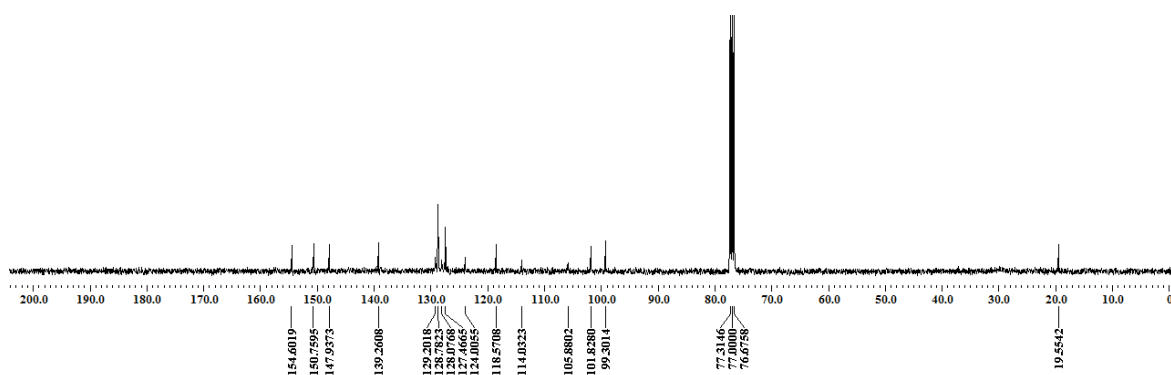

## HRMS

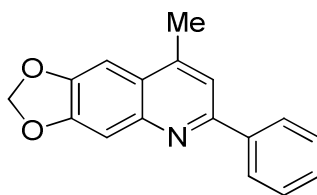

### 8-Methyl-6-phenyl-[1,3]dioxolo[4,5-g]quinoline (4g)

MFE MS Spectrum

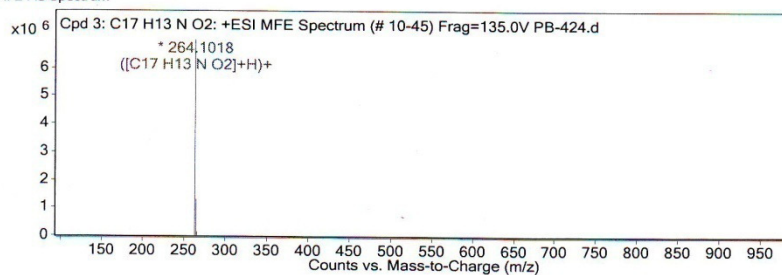

MFE MS Zoomed Spectrum

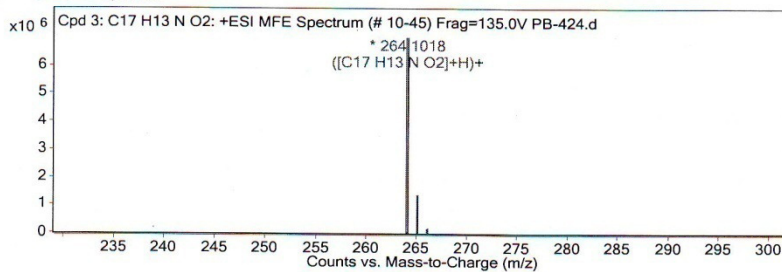



<sup>1</sup>H NMR

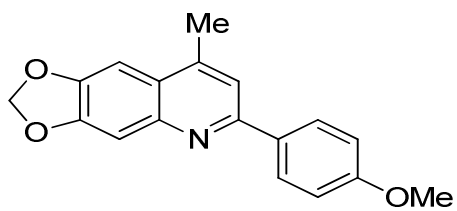

6-(4-Methoxyphenyl)-8-methyl-[1,3]dioxolo[4,5-g]quinoline (4h)

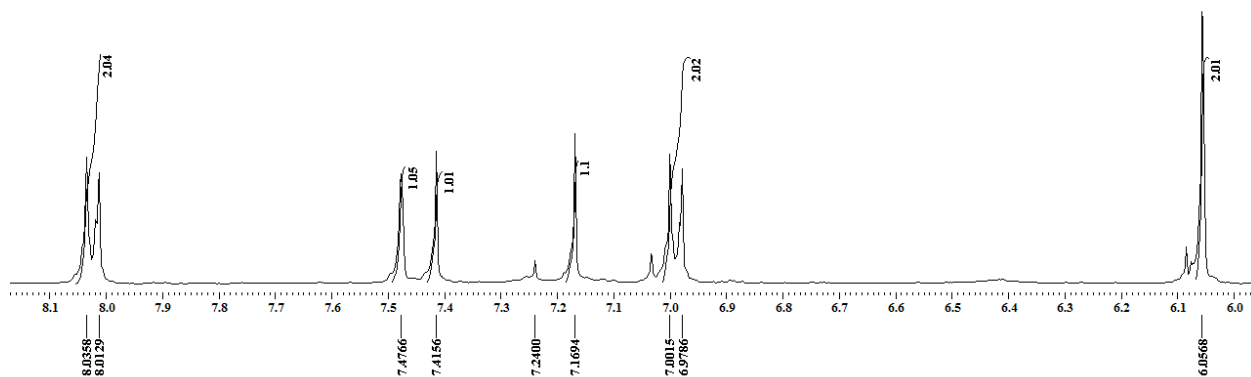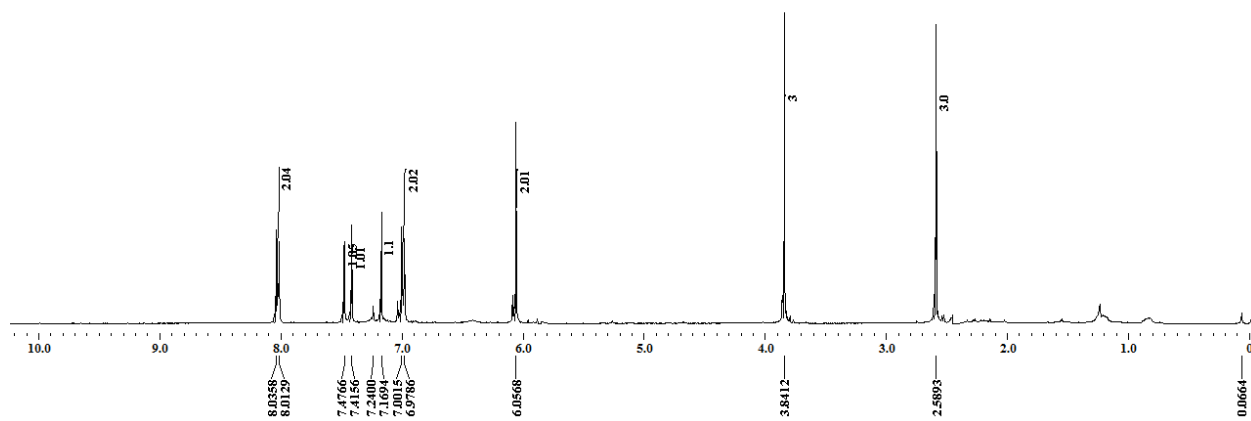

<sup>13</sup>C NMR

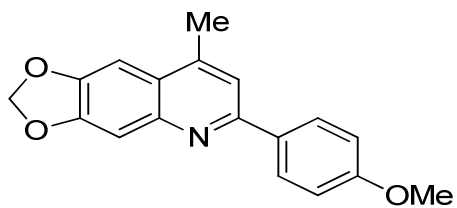

**6-(4-Methoxyphenyl)-8-methyl-[1,3]dioxolo[4,5-g]quinoline (4h)**

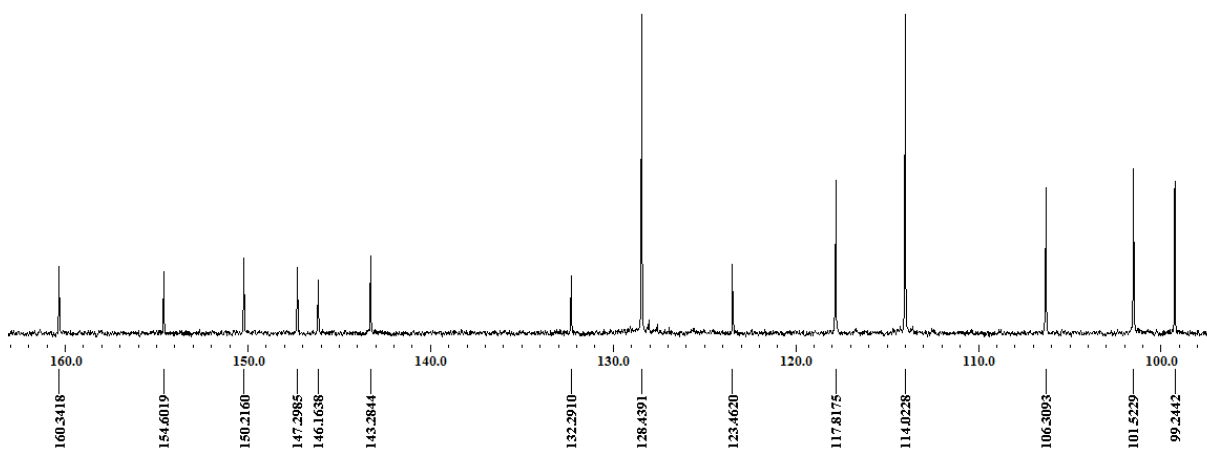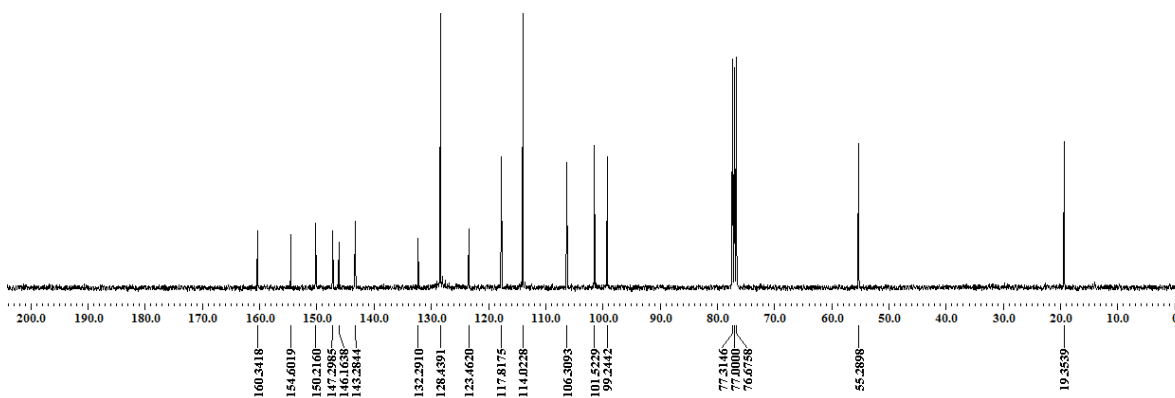

## HRMS



**6-(4-Methoxyphenyl)-8-methyl-[1,3]dioxolo[4,5-g]quinoline (4h)**

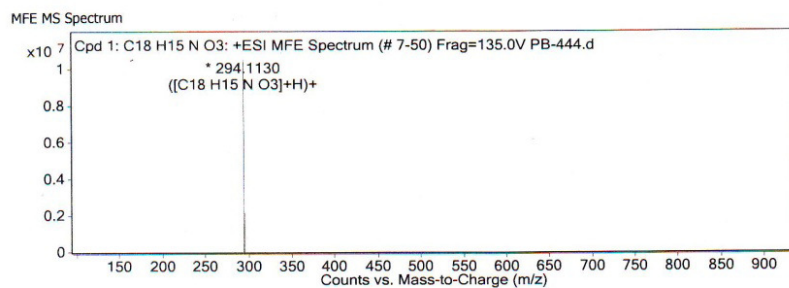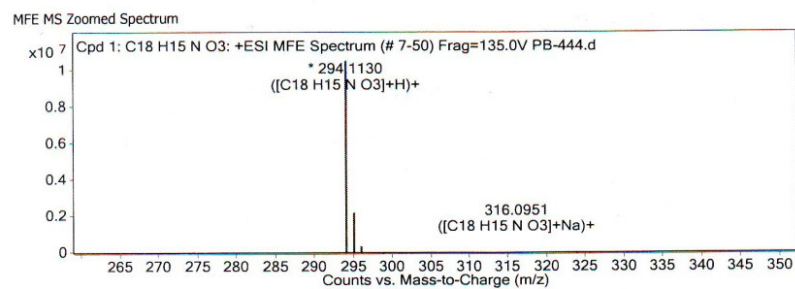

<sup>1</sup>H NMR

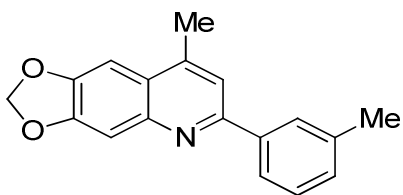

8-Methyl-6-(*m*-tolyl)-[1,3]dioxolo[4,5-*g*]quinoline (4i)

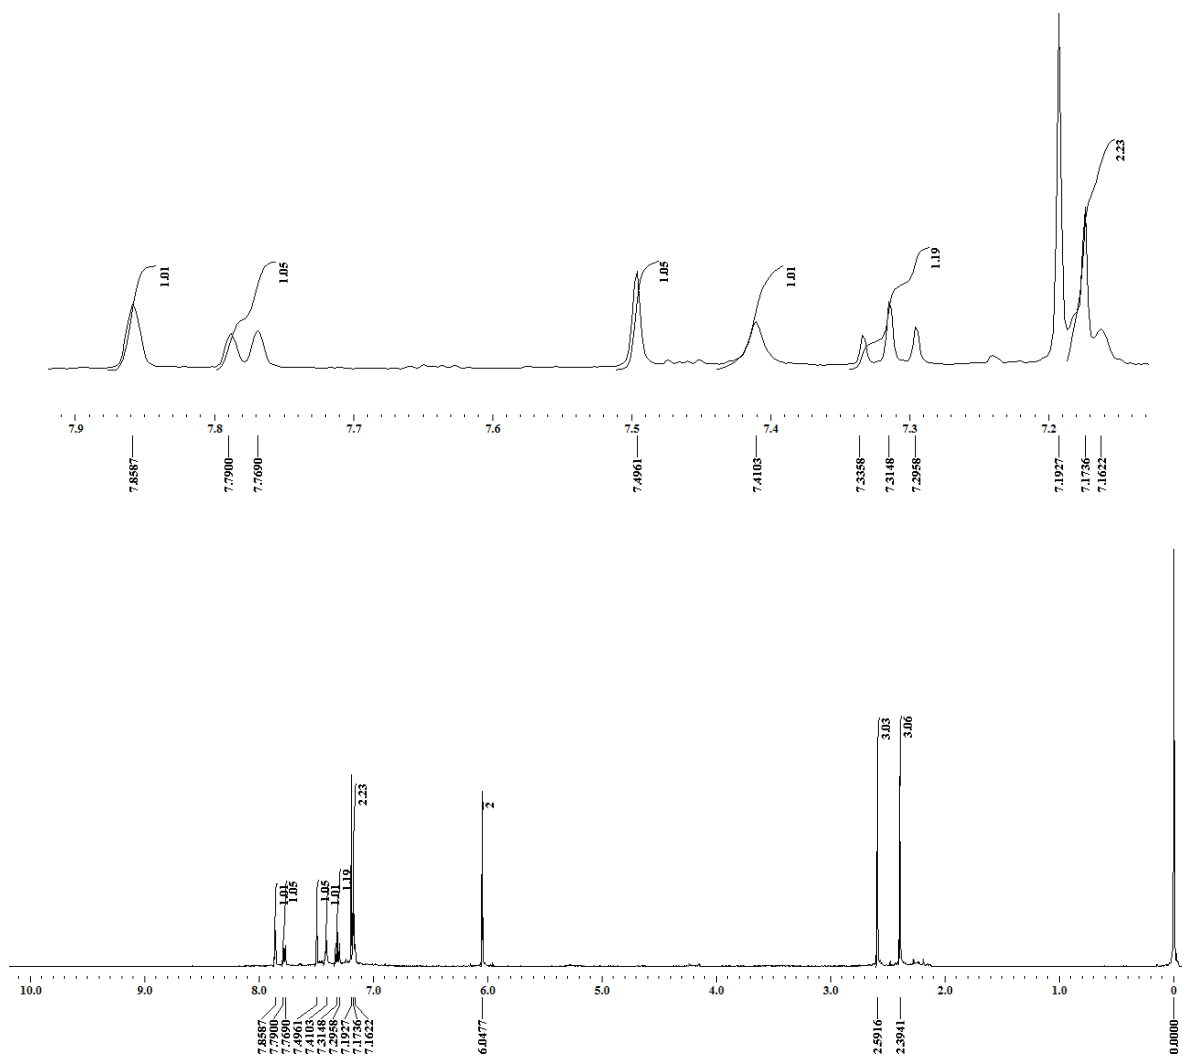

<sup>13</sup>C NMR



8-Methyl-6-(*m*-tolyl)-[1,3]dioxolo[4,5-*g*]quinoline (4i)

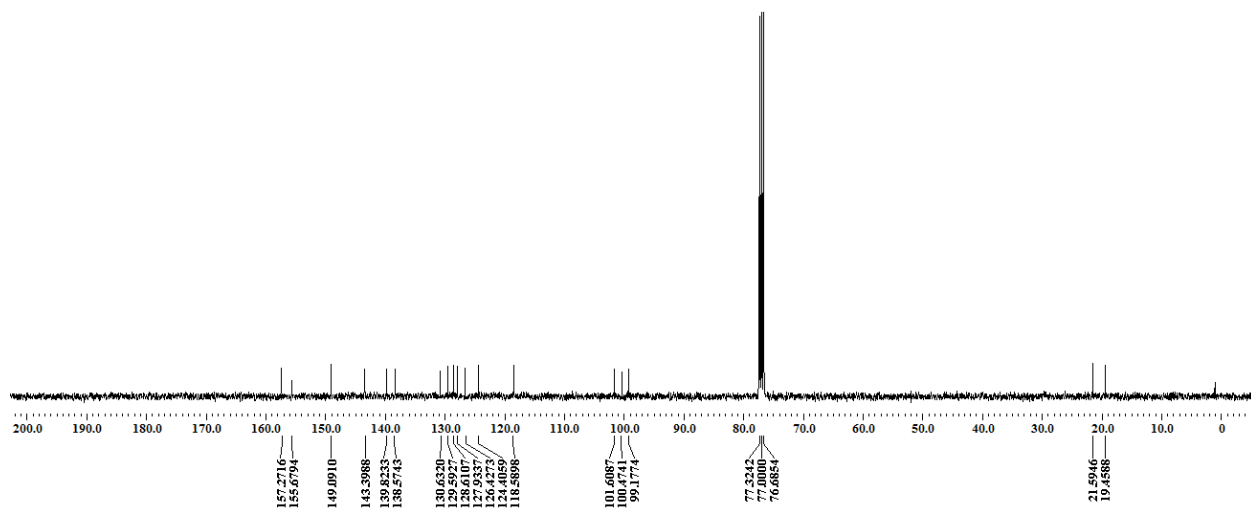

## HRMS

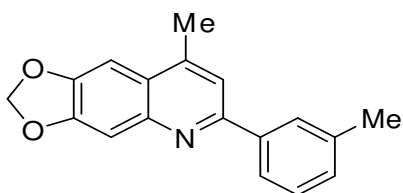

**8-Methyl-6-(*m*-tolyl)-[1,3]dioxolo[4,5-*g*]quinoline (4i)**

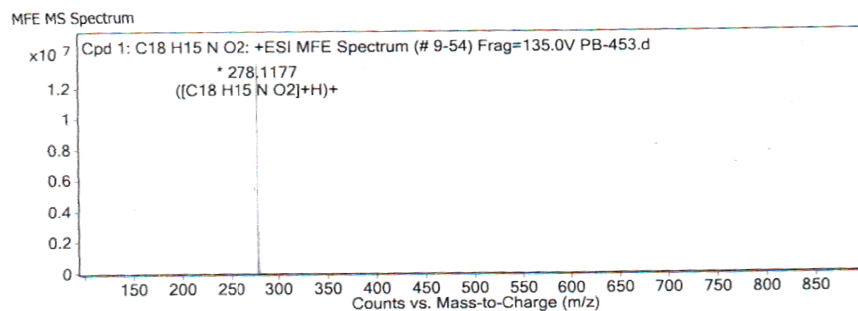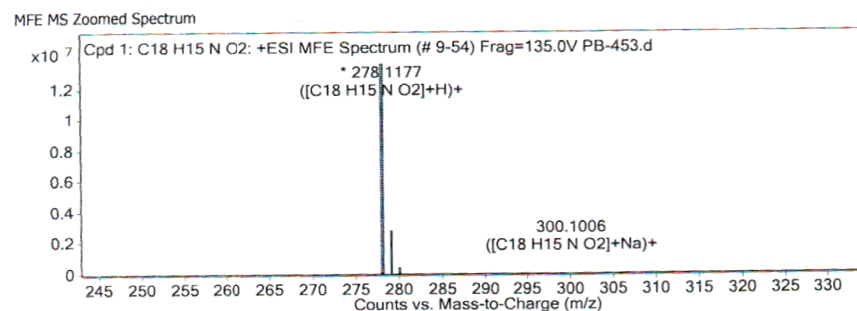

<sup>1</sup>H NMR

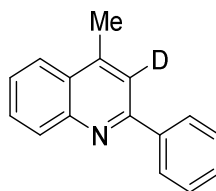

4-Methyl-2-phenylquinoline-3-d (3a-D<sub>1</sub>)

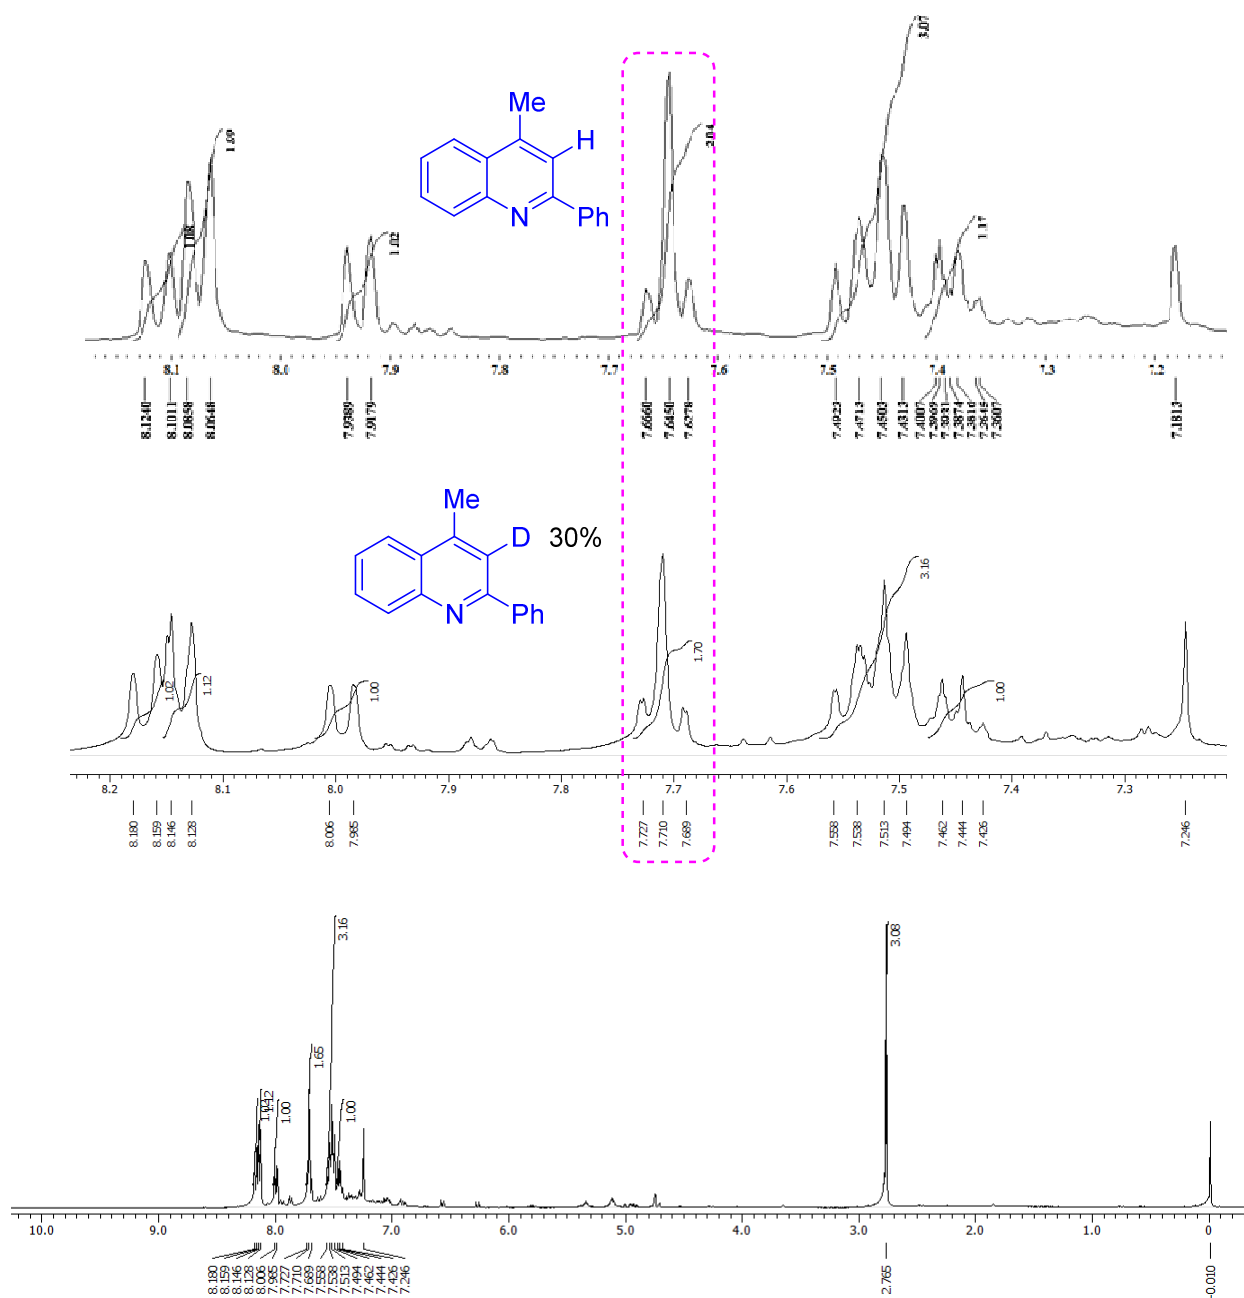

## HRMS

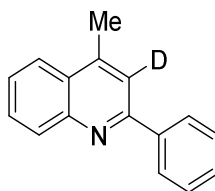

**4-Methyl-2-phenylquinoline-3-d (3a-D<sub>1</sub>)**

|               |         |             |           |                 |              |                        |                     |
|---------------|---------|-------------|-----------|-----------------|--------------|------------------------|---------------------|
| Sample Name   | VG-QD   | Position    | P1-E4     | Instrument Name | Instrument 1 | User Name              |                     |
| Inj Vol       | 1       | InjPosition |           | SampleType      | Sample       | IRM Calibration Status | Success             |
| Data Filename | VG-QD.d | ACQ Method  | Demo JK.m | Comment         |              | Acquired Time          | 12-07-2019 17:08:05 |

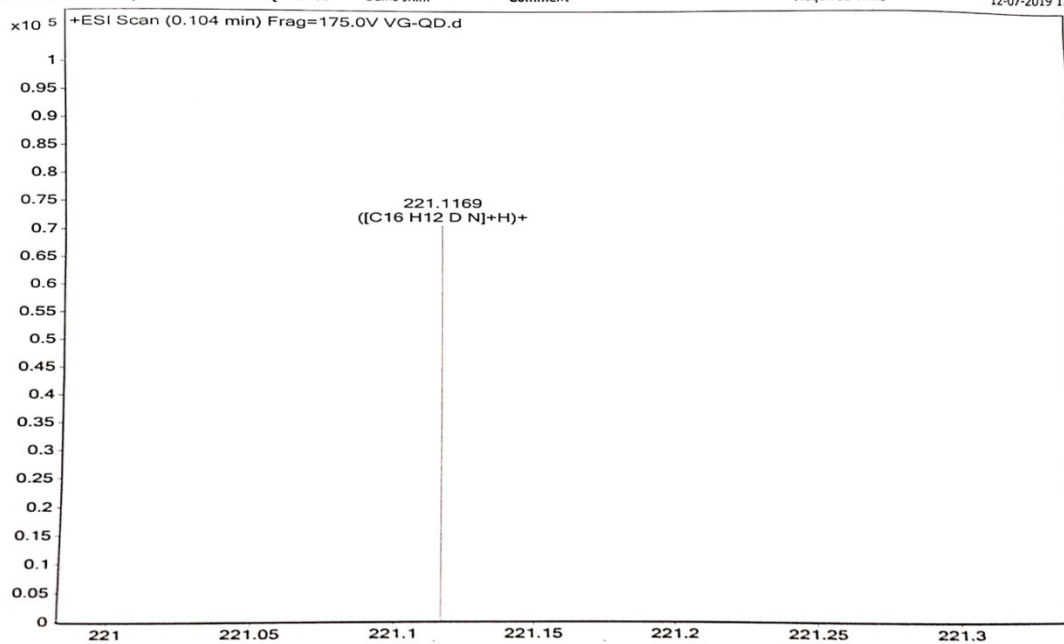



<sup>1</sup>H NMR

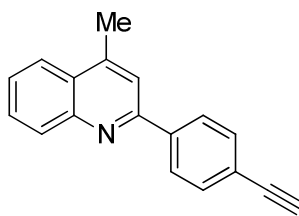

**2-(4-Ethynylphenyl)-4-methylquinoline (5a)**

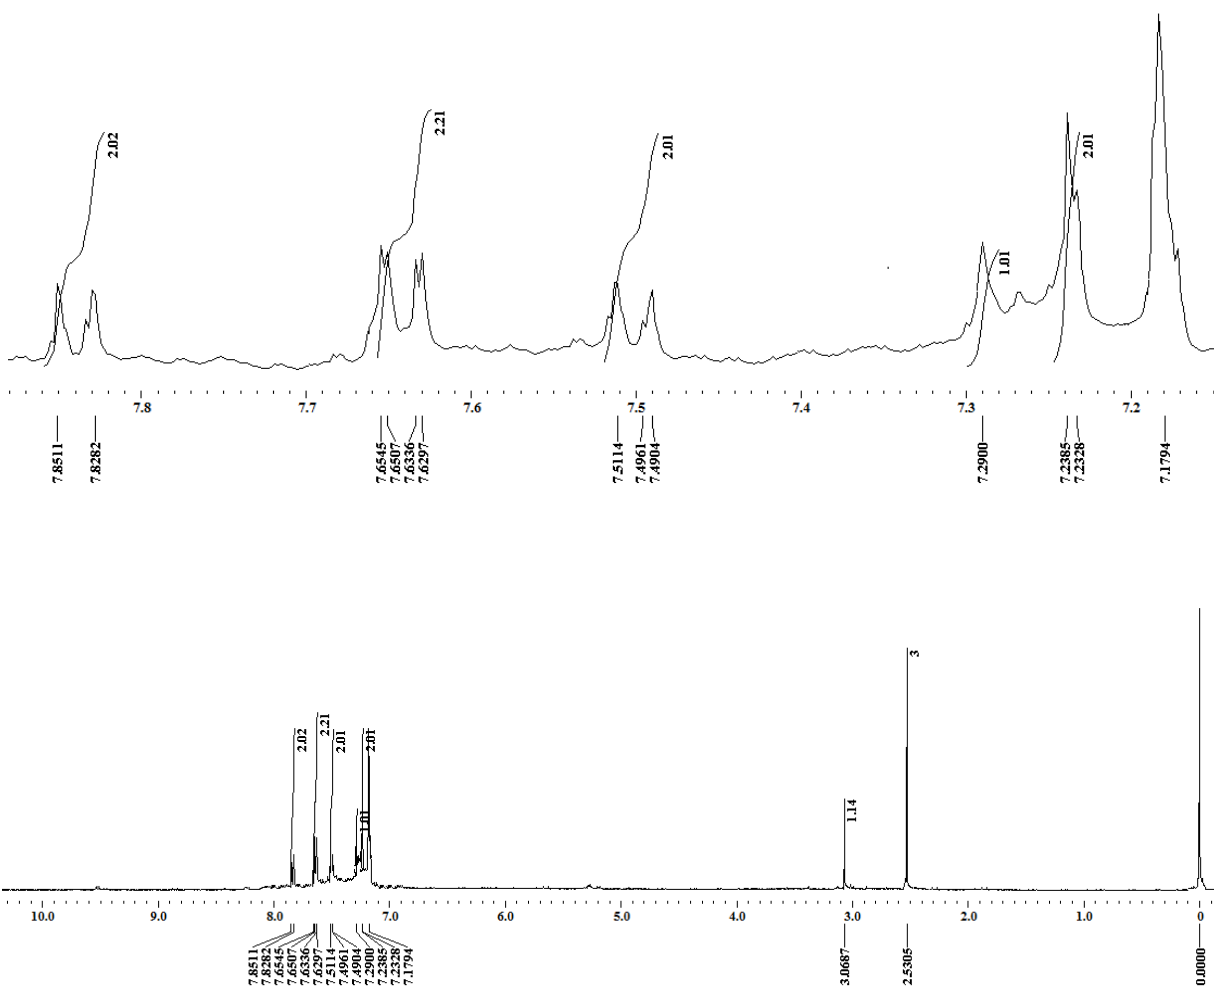

<sup>13</sup>C NMR



**2-(4-Ethynylphenyl)-4-methylquinoline (5a)**

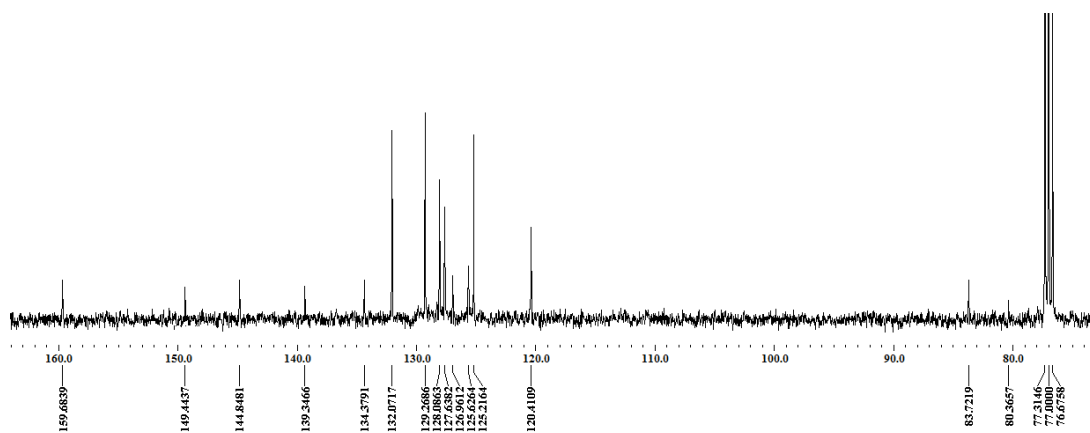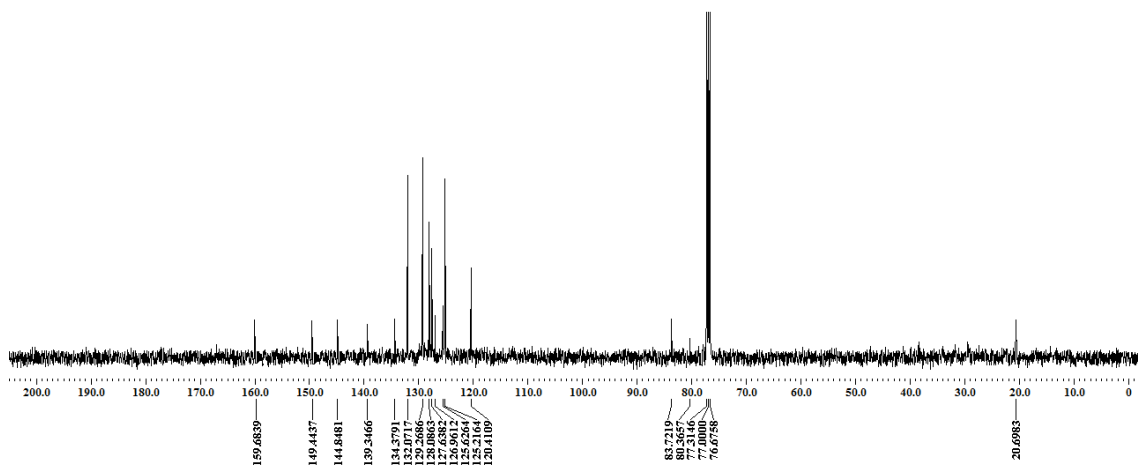

## HRMS

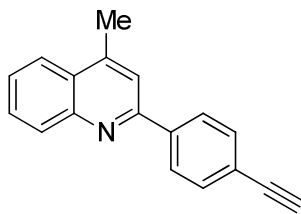

**2-(4-Ethynylphenyl)-4-methylquinoline (5a)**

MFE MS Spectrum

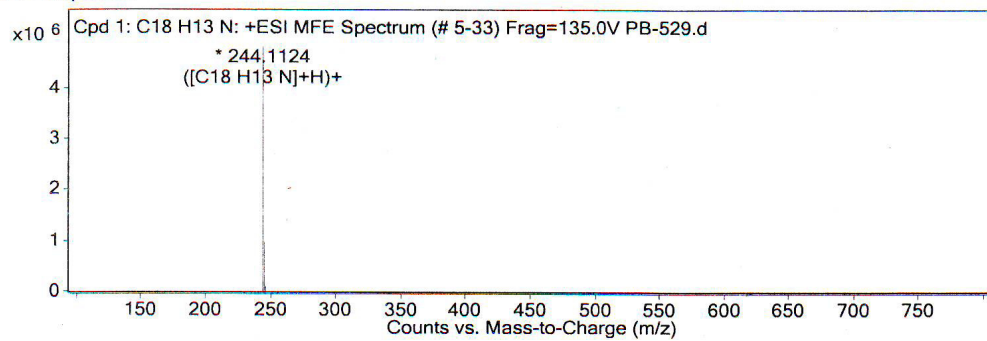

MFE MS Zoomed Spectrum

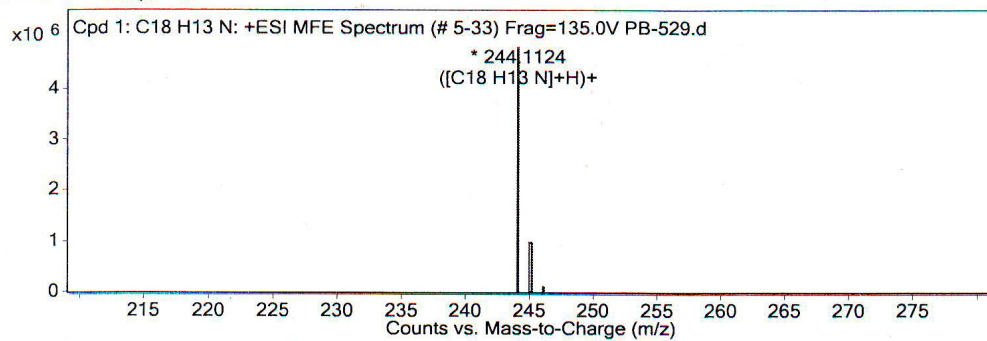

<sup>1</sup>H NMR

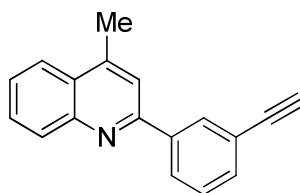

**2-(3-Ethynylphenyl)-4-methylquinoline (5b)**

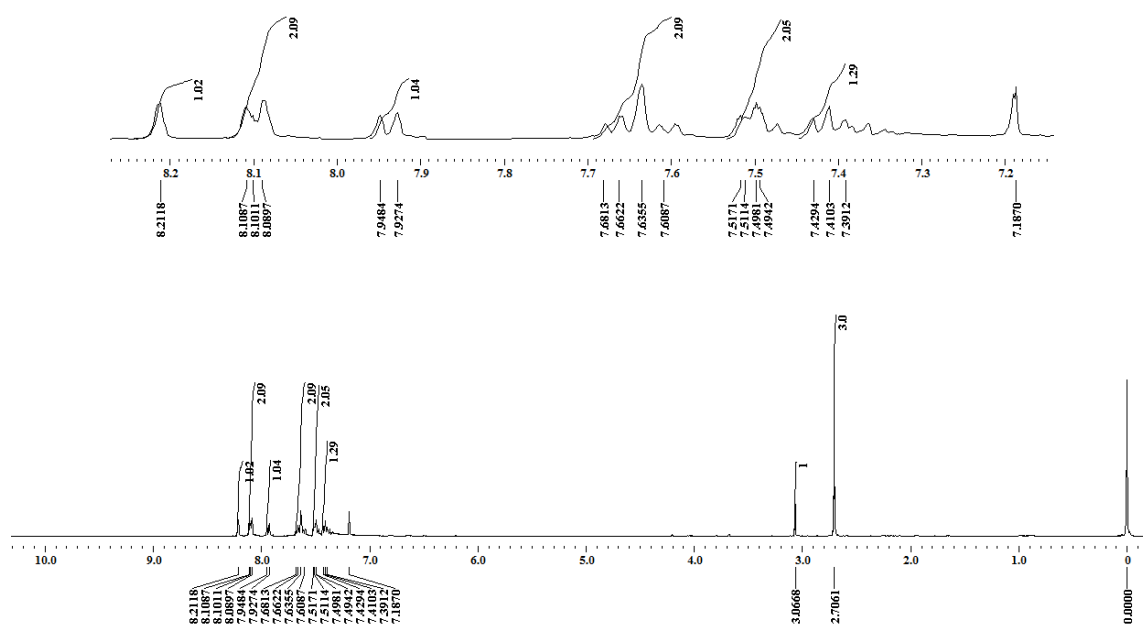

<sup>13</sup>C NMR

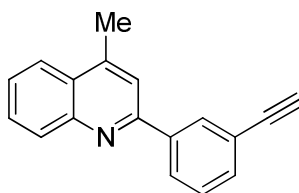

**2-(3-Ethynylphenyl)-4-methylquinoline (5b)**

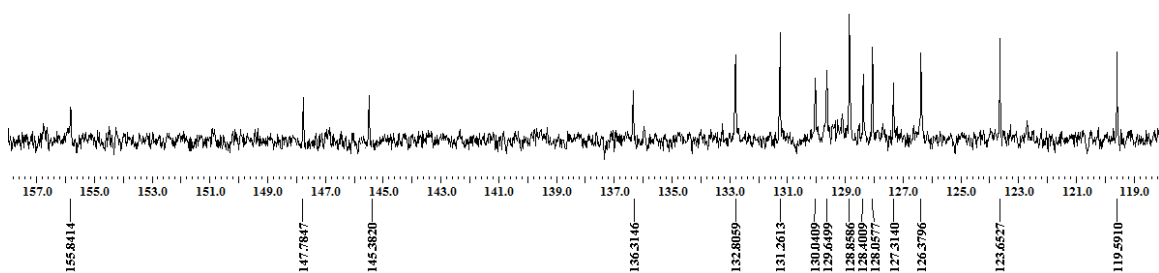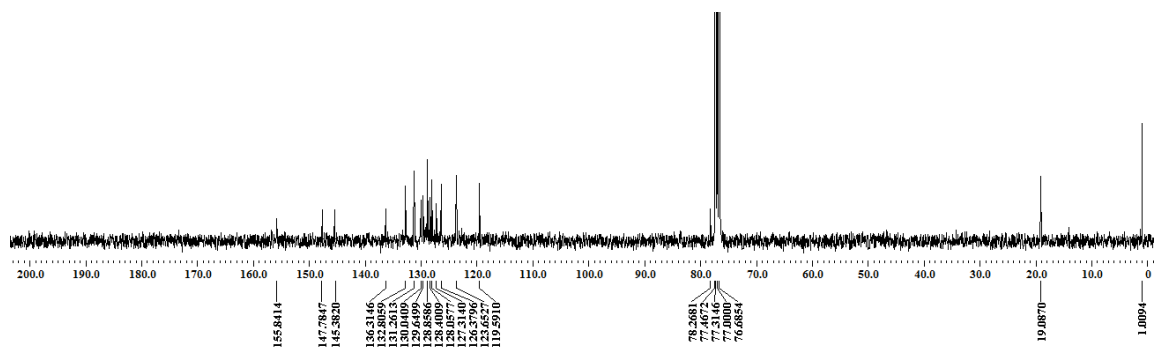

## HRMS

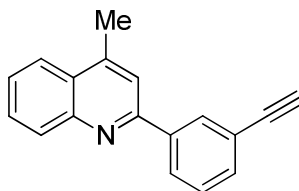

**2-(3-Ethynylphenyl)-4-methylquinoline (5b)**

MFE MS Spectrum

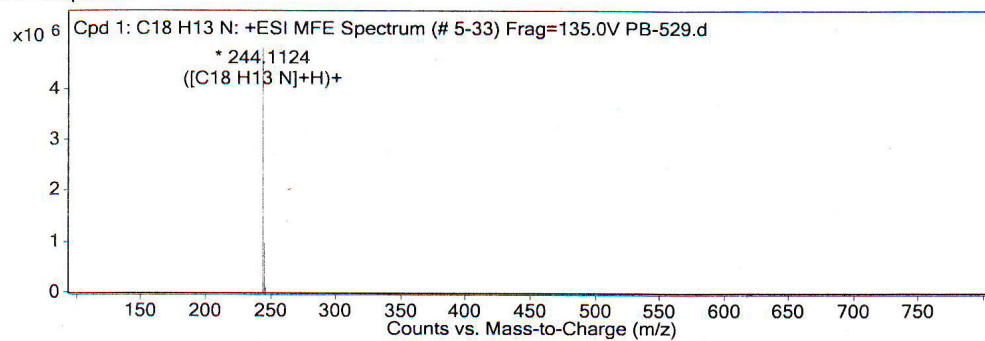

MFE MS Zoomed Spectrum

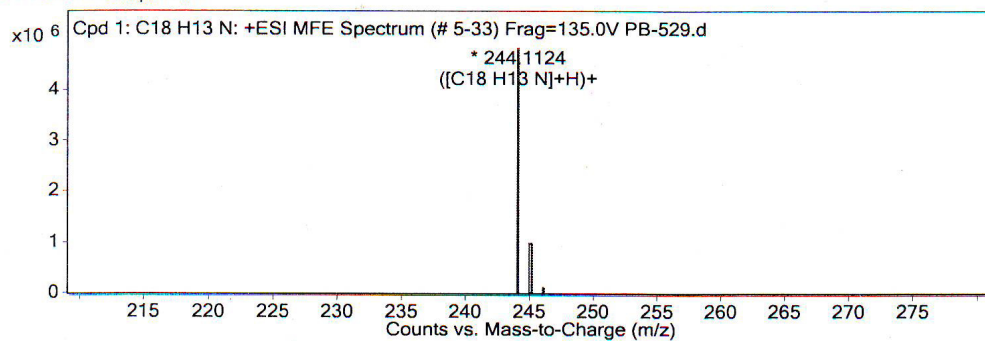

<sup>1</sup>H NMR

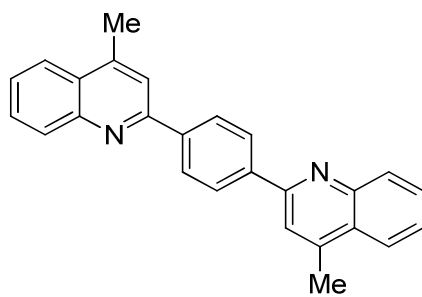

2-(4-Ethynylphenyl)-4-methylquinoline (5c)

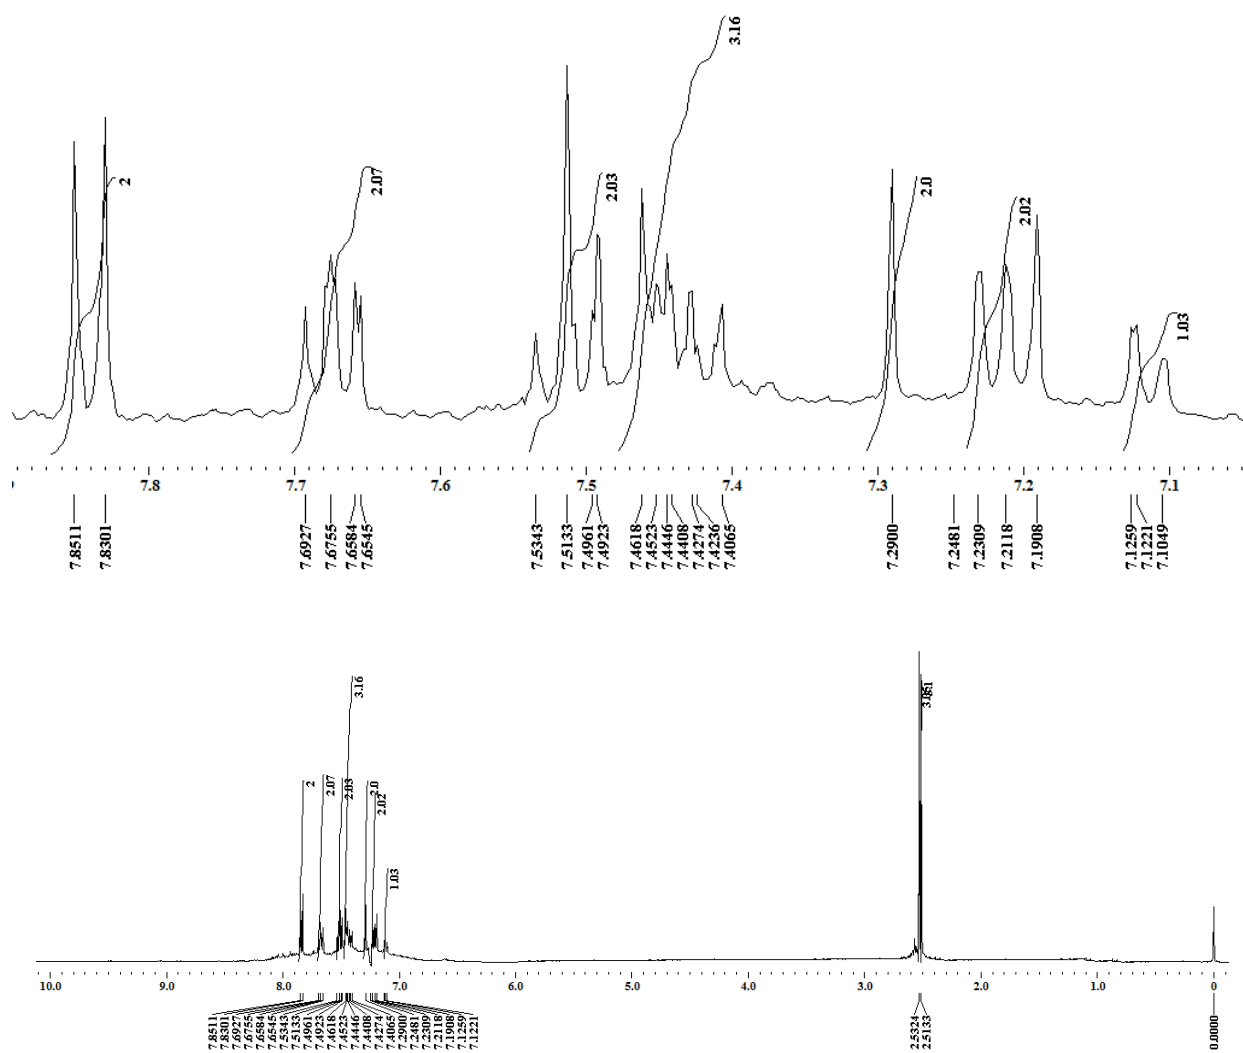

<sup>13</sup>C NMR



2-(4-Ethynylphenyl)-4-methylquinoline (5c)

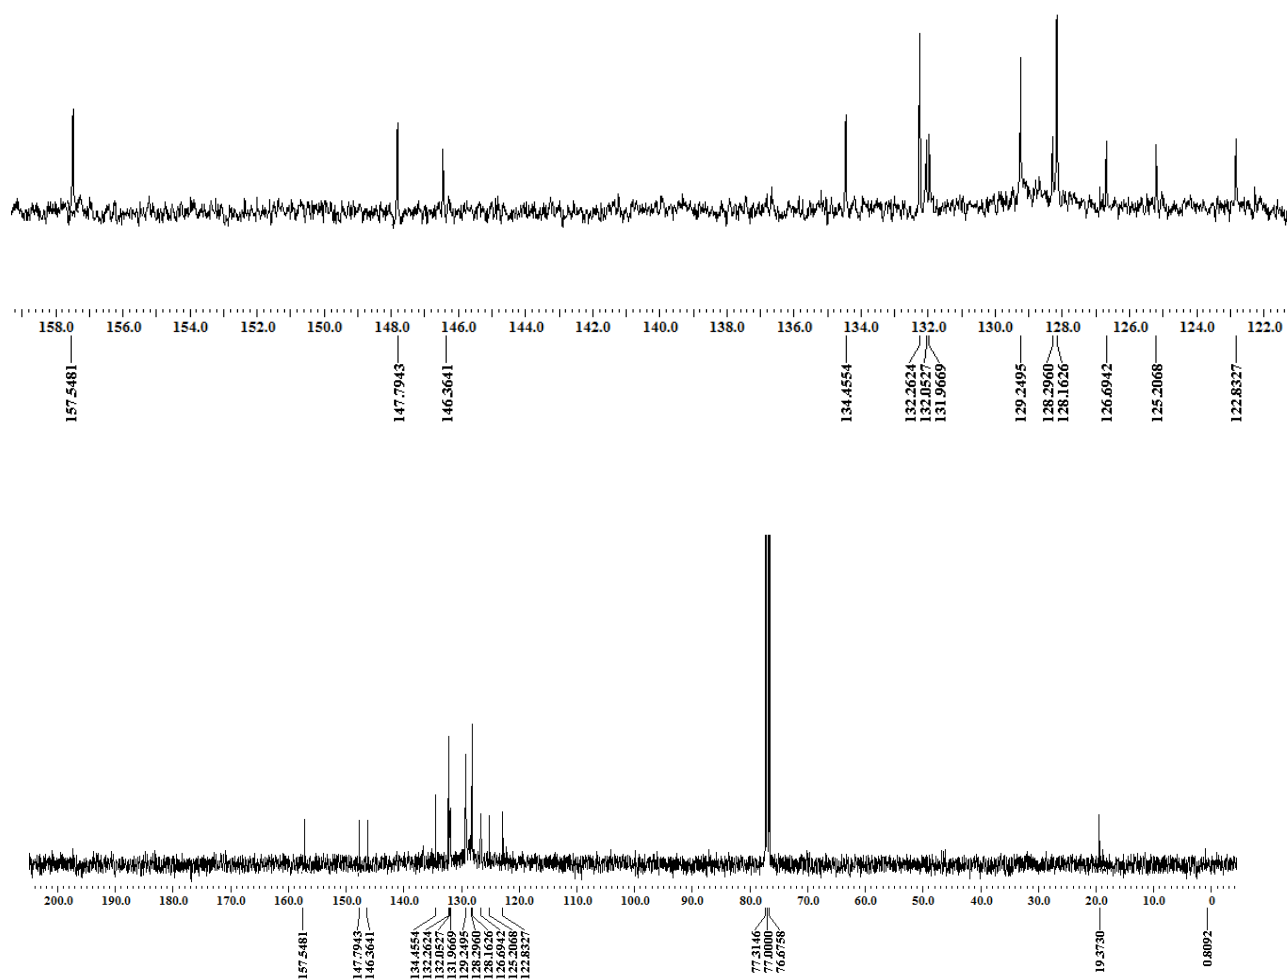



## HRMS

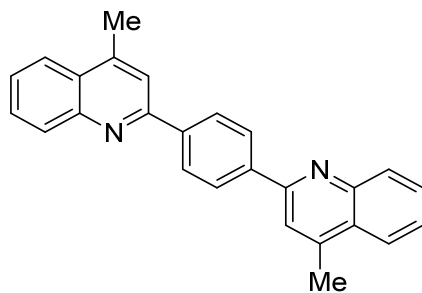

**2-(4-Ethynylphenyl)-4-methylquinoline (5c)**

| Sample Name   | Position    | Instrument Name | User Name              |
|---------------|-------------|-----------------|------------------------|
| VG-634        | P1-C8       | Instrument 1    |                        |
| Inj Vol       | InjPosition | SampleType      | IRM Calibration Status |
| 1             |             | Sample          | Success                |
| Data Filename | ACQ Method  | Comment         | Acquired Time          |
| VG-634.d      | Damo JK.m   |                 | 28-03-2019 13:37:43    |

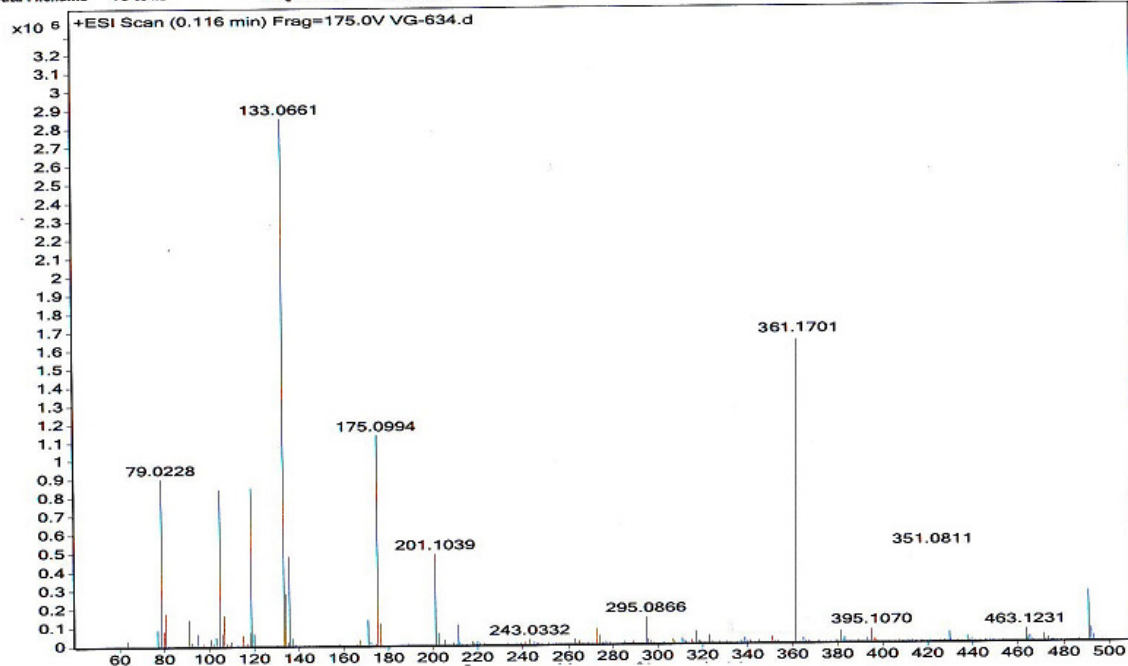

<sup>1</sup>H NMR

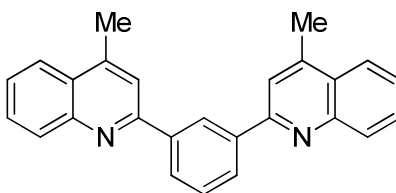

1,3-Bis(4-methylquinolin-2-yl)benzene (5d)

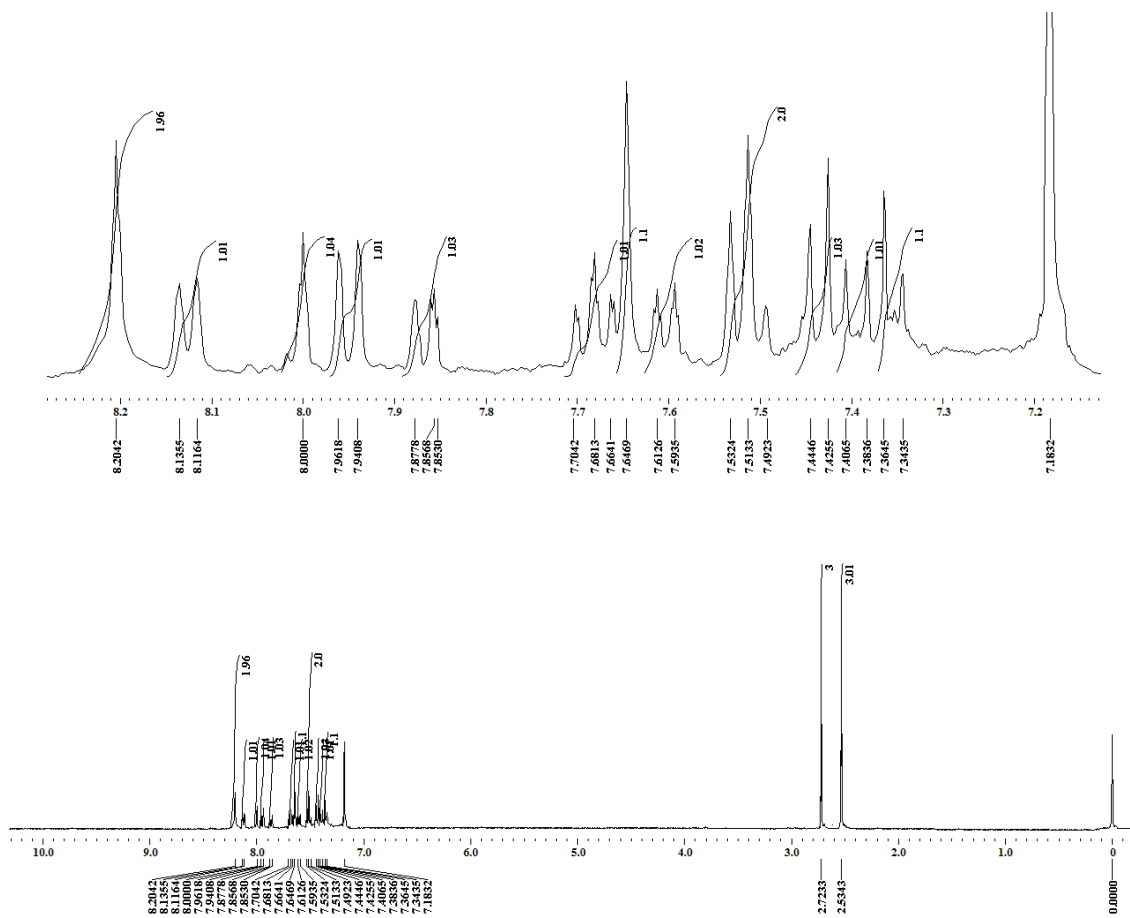

<sup>13</sup>C NMR



**1,3-Bis(4-methylquinolin-2-yl)benzene (5d)**

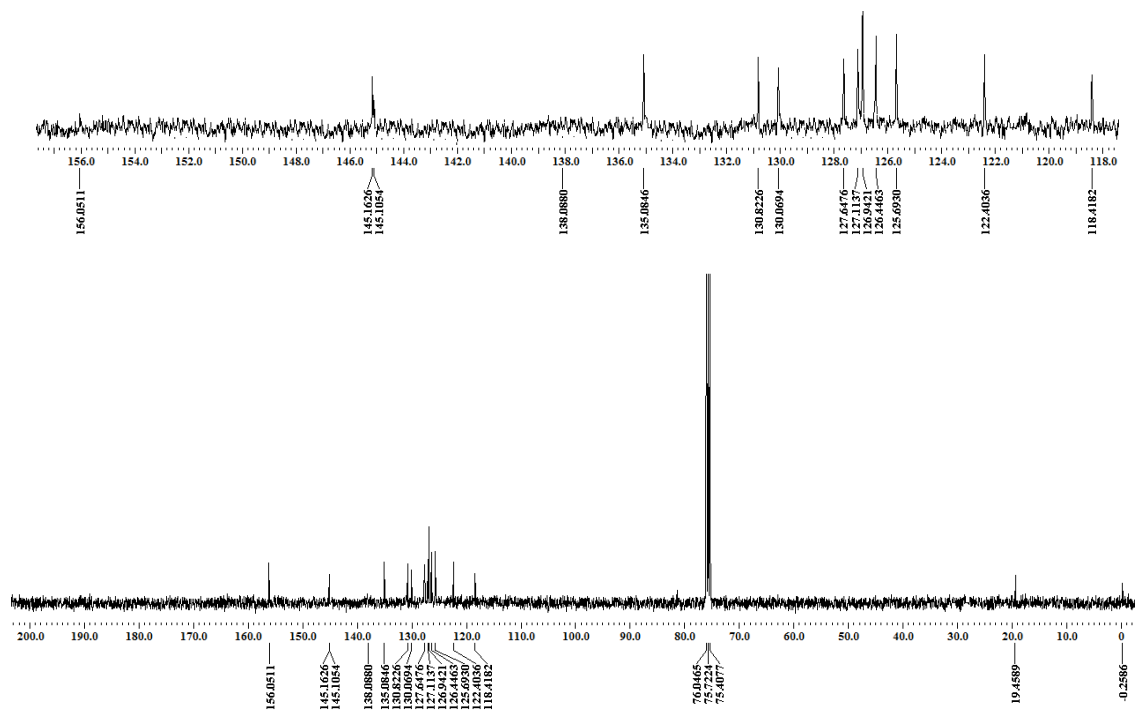

# HRMS



**1,3-Bis(4-methylquinolin-2-yl)benzene (5d)**

|               |          |             |              |                 |              |                        |                     |
|---------------|----------|-------------|--------------|-----------------|--------------|------------------------|---------------------|
| Sample Name   | RH-350   | Position    | P1-B7        | Instrument Name | Instrument 1 | User Name              |                     |
| Inj Vol       | 5        | InjPosition |              | SampleType      | Sample       | IRM Calibration Status | Success             |
| Data Filename | RH-350.d | ACQ Method  | 29.10.2014.m | Comment         |              | Acquired Time          | 29-11-2016 13:37:18 |

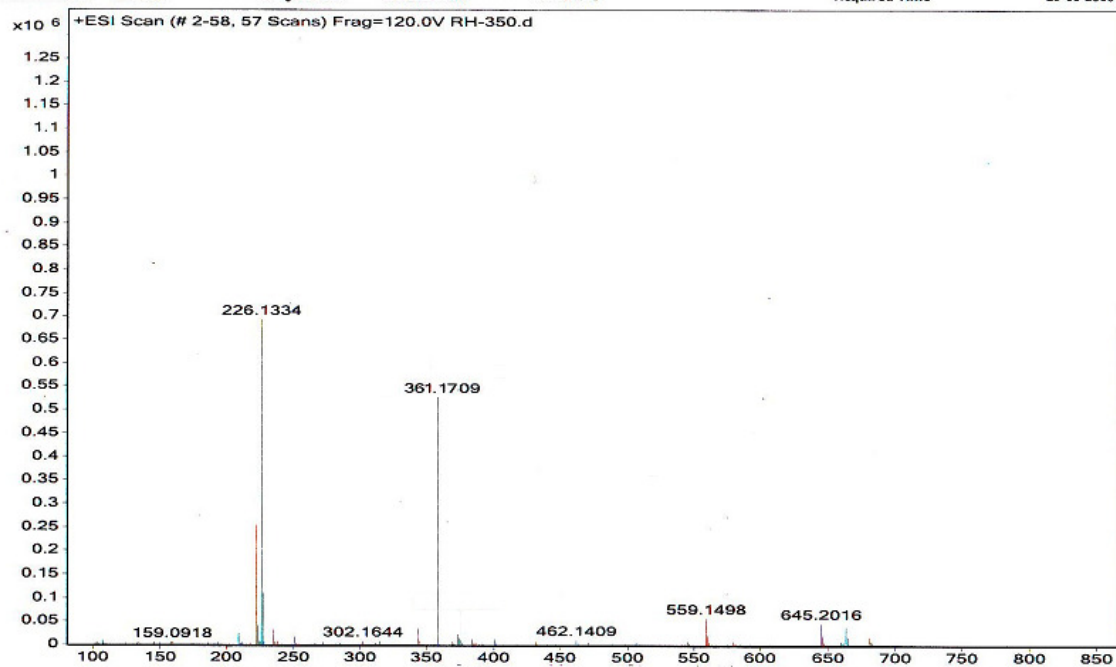

<sup>1</sup>H NMR

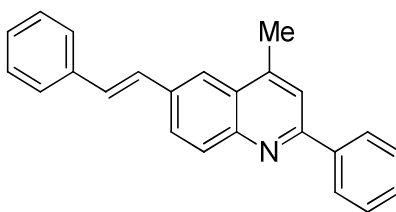

(*E*)-4-Methyl-2-phenyl-6-styrylquinoline (8a)

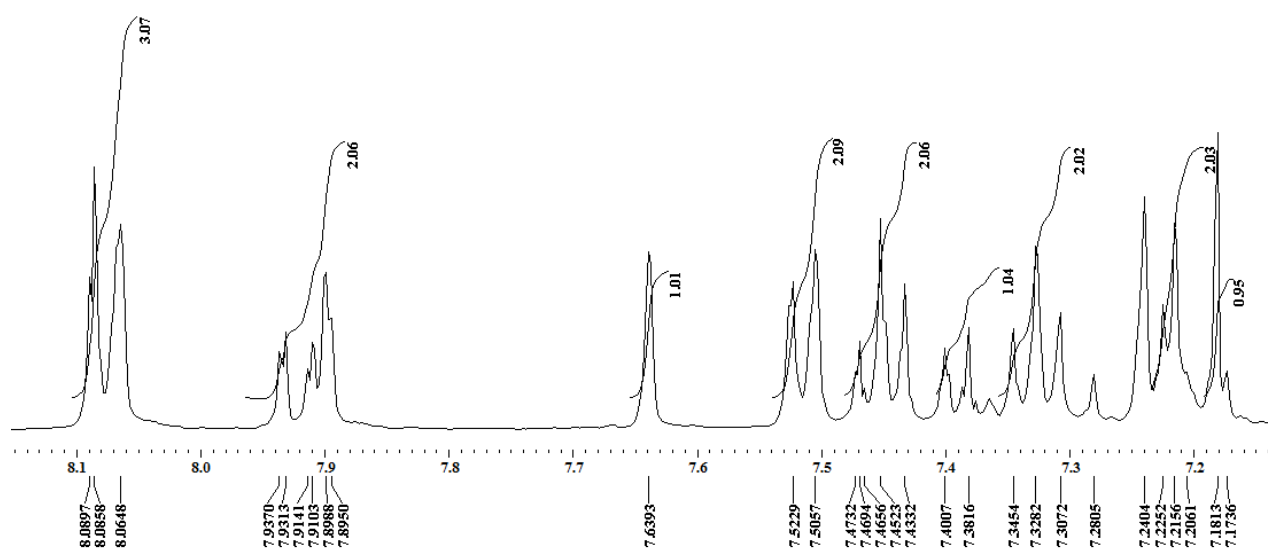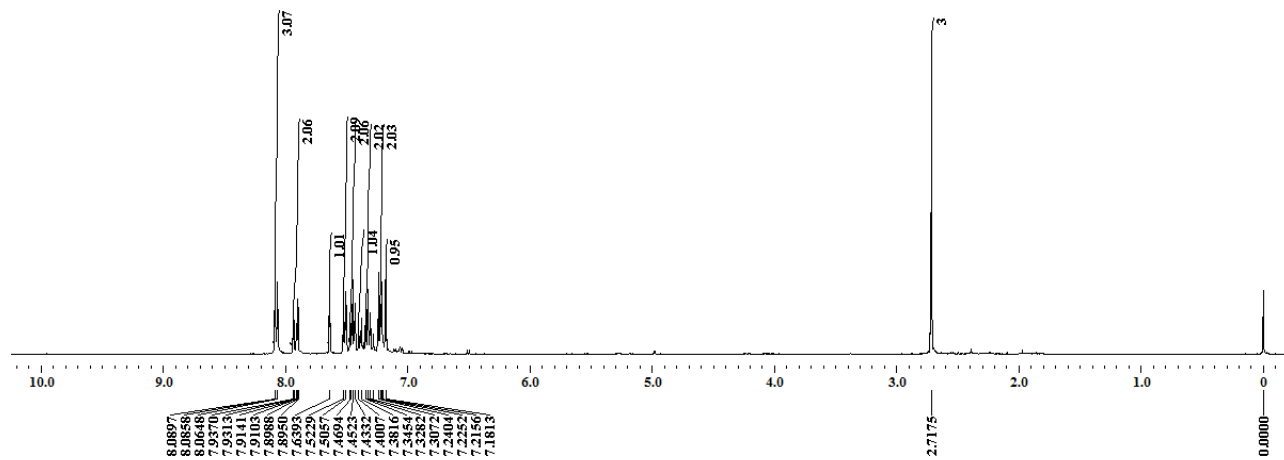

<sup>13</sup>C NMR



(*E*)-4-Methyl-2-phenyl-6-styrylquinoline (8a)

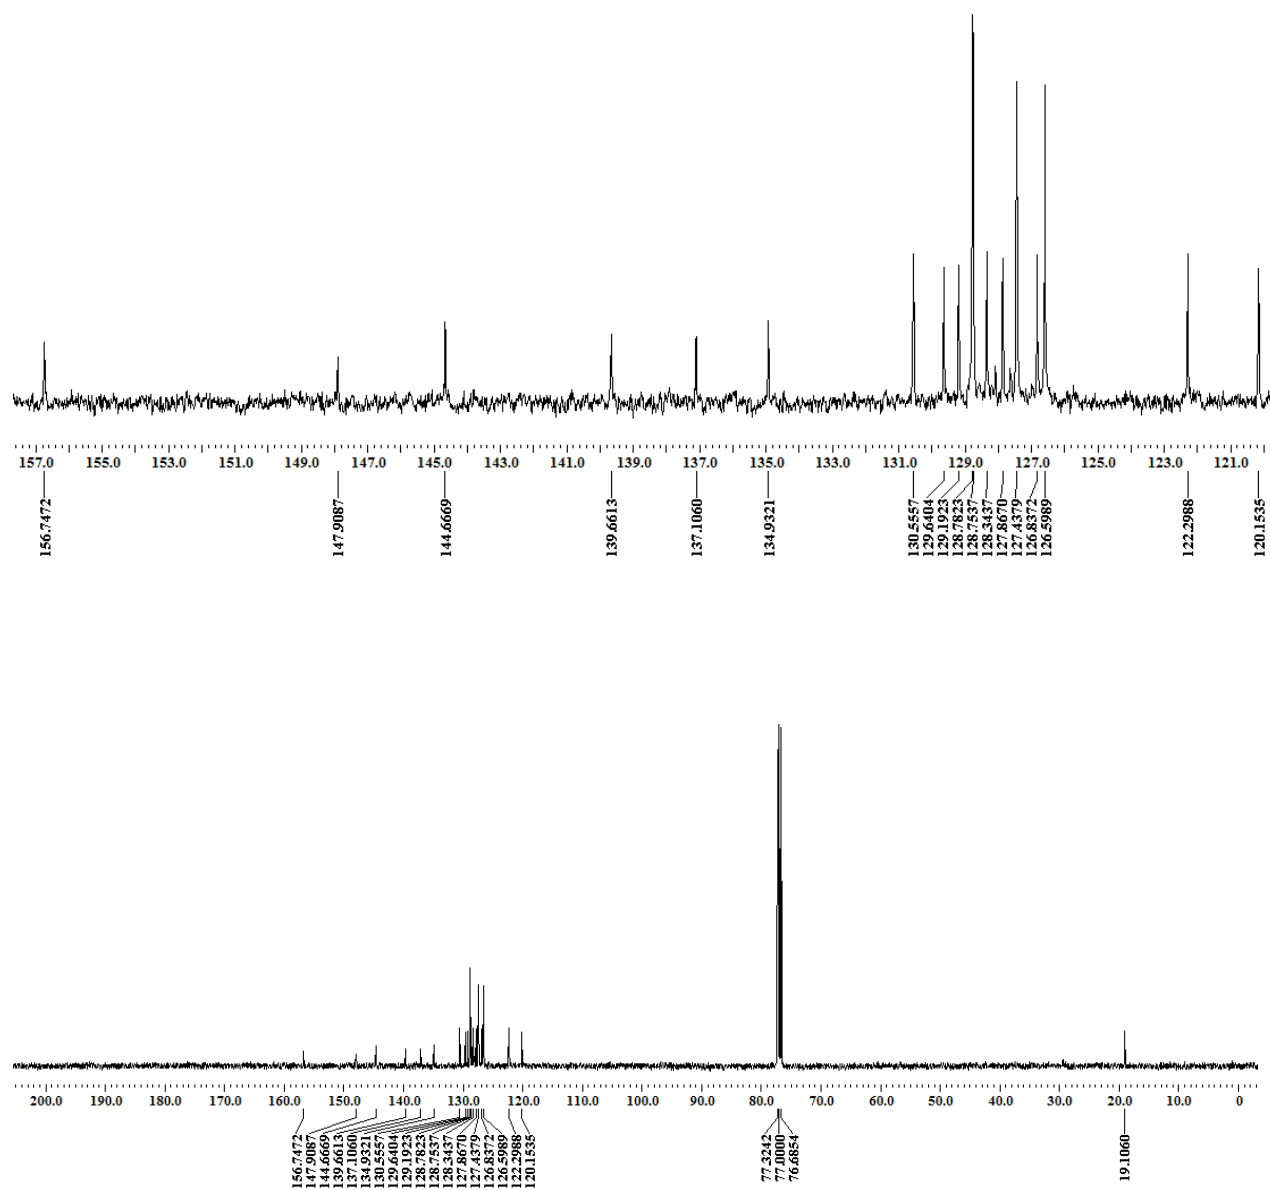

## HRMS

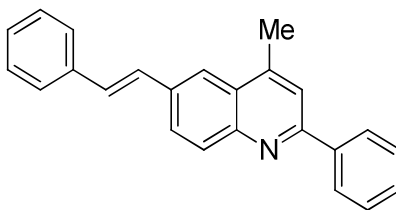

**(E)-4-Methyl-2-phenyl-6-styrylquinoline (8a)**

MFE MS Spectrum

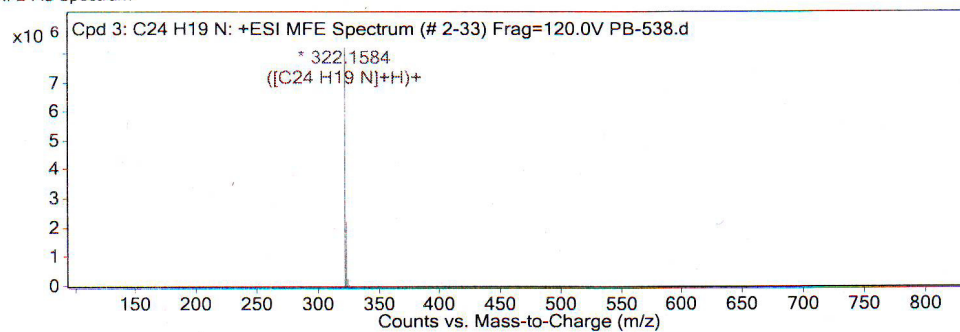

MFE MS Zoomed Spectrum

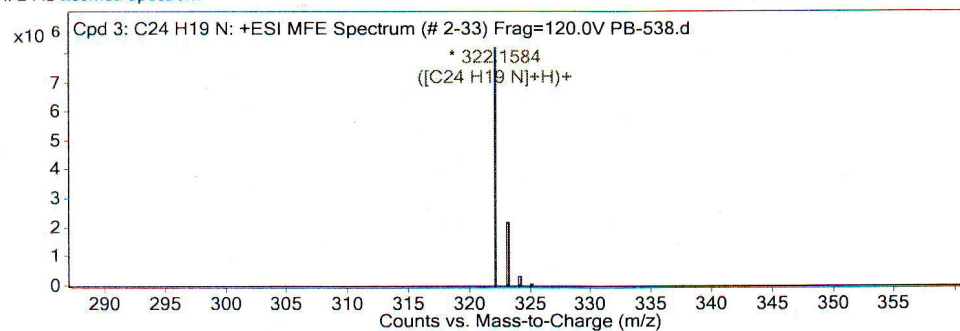

<sup>1</sup>H NMR

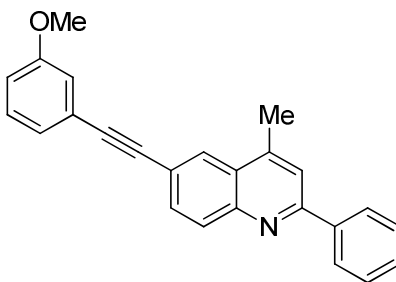

6-((3-Methoxyphenyl)ethynyl)-4-methyl-2-phenylquinoline (8b)

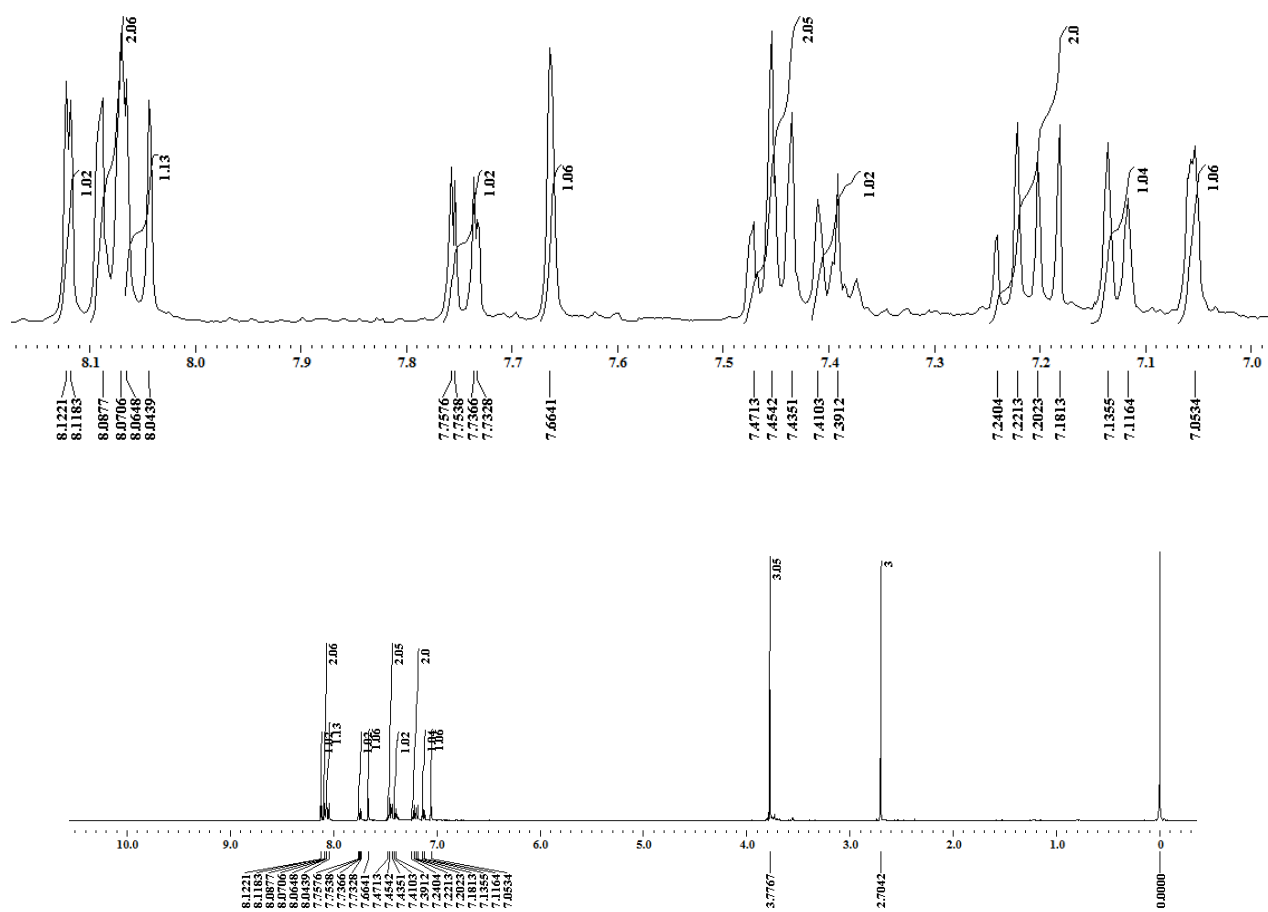



<sup>13</sup>C NMR



6-((3-Methoxyphenyl)ethynyl)-4-methyl-2-phenylquinoline (8b)

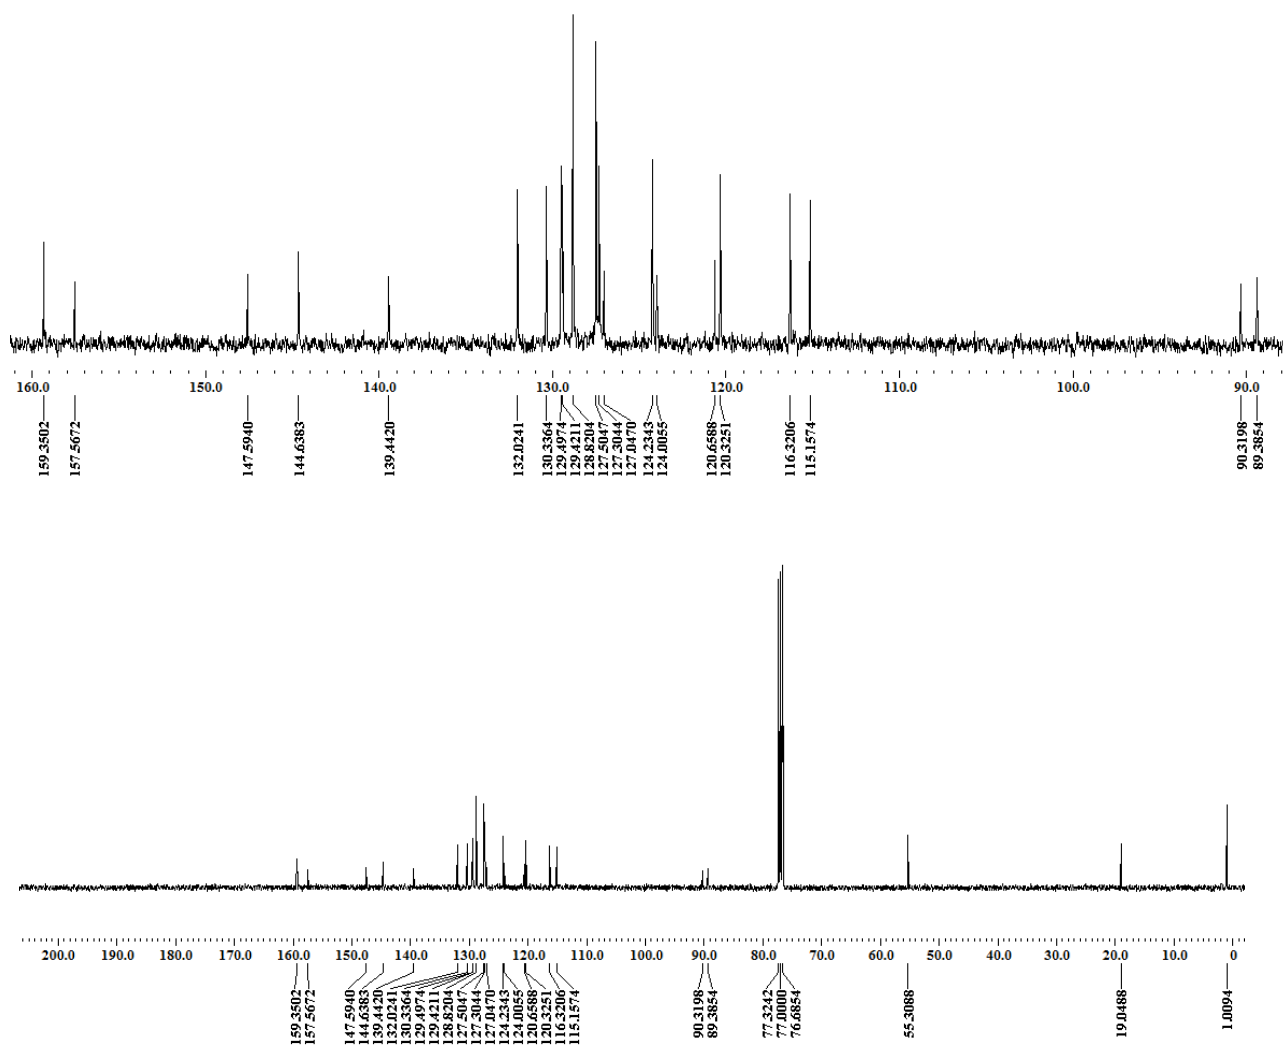

## HRMS



### 6-((3-Methoxyphenyl)ethynyl)-4-methyl-2-phenylquinoline (8b)

MFE MS Spectrum

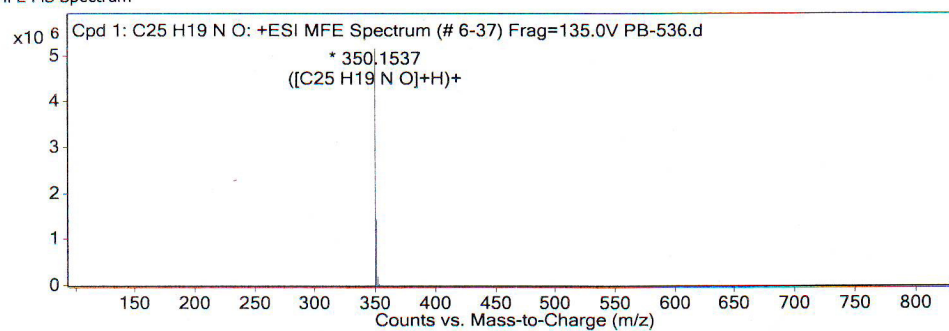

MFE MS Zoomed Spectrum

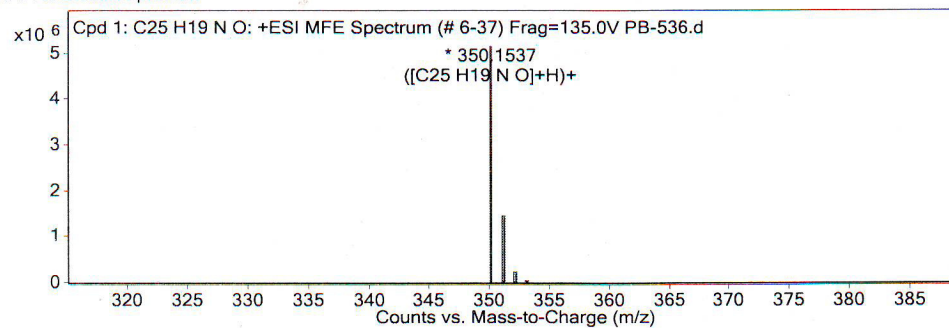

<sup>1</sup>H NMR

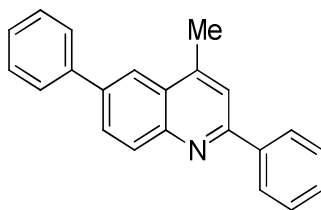

4-Methyl-2,6-diphenylquinoline (8c)

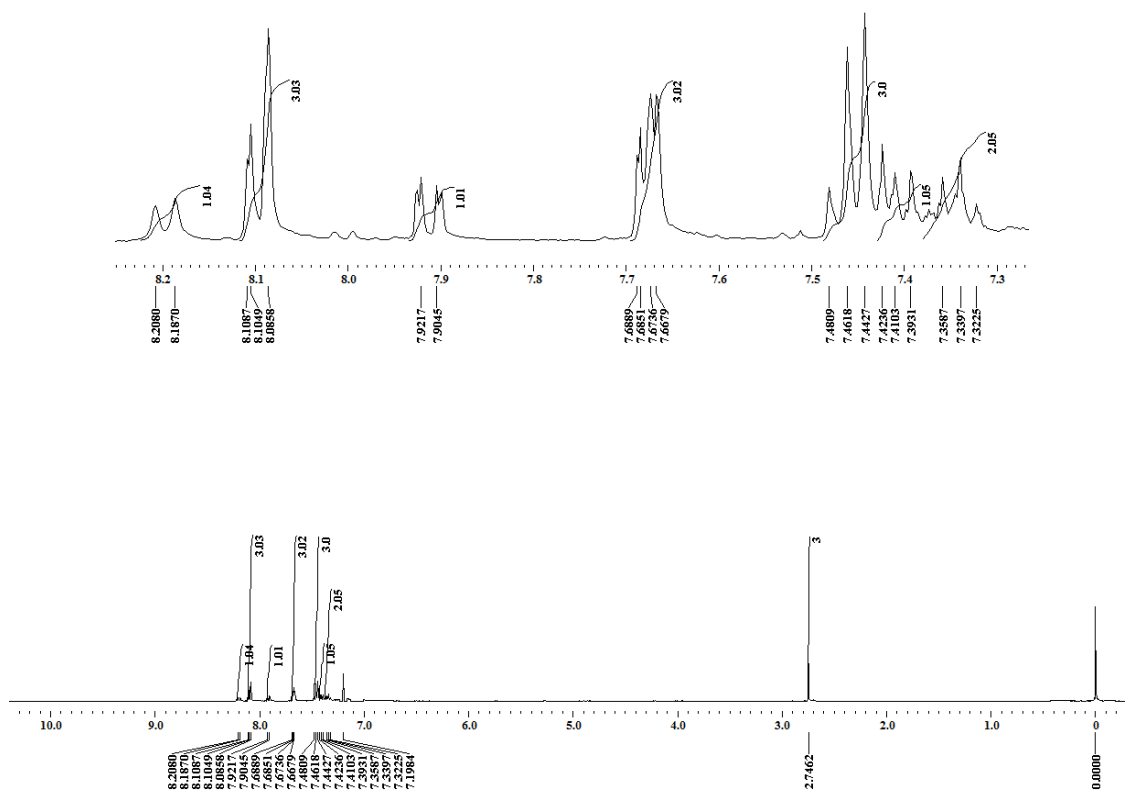

<sup>13</sup>C NMR



4-Methyl-2,6-diphenylquinoline (8c)

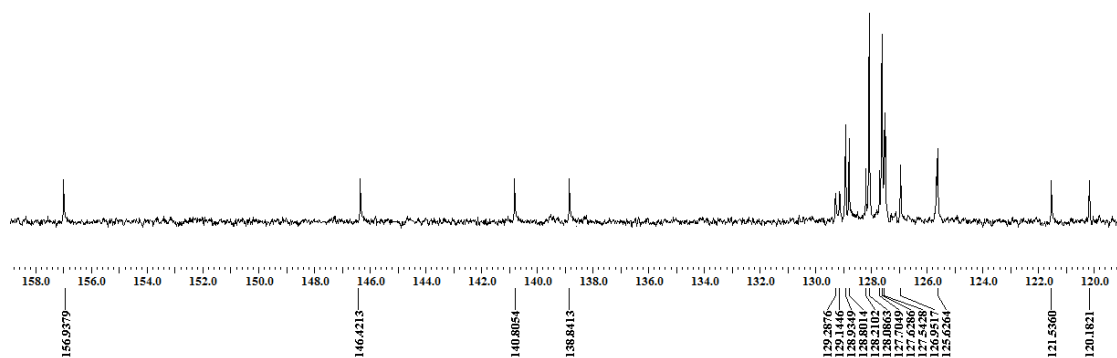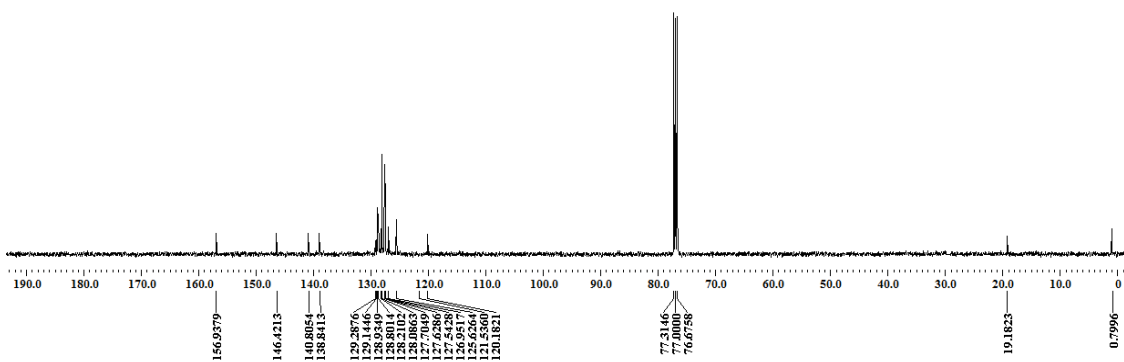

## HRMS



**4-Methyl-2,6-diphenylquinoline (8c)**

MFE MS Spectrum

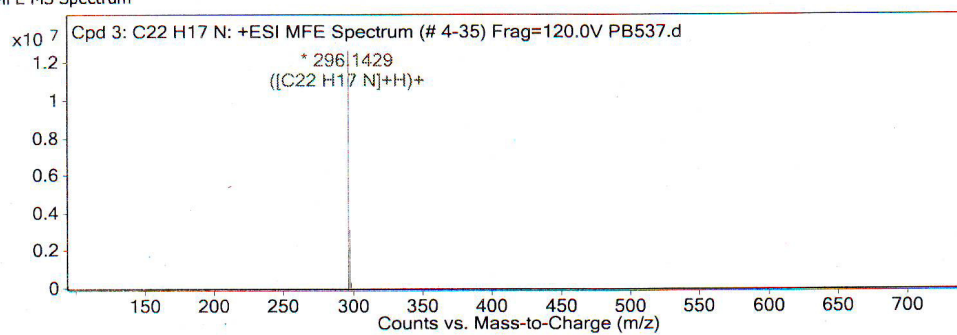

MFE MS Zoomed Spectrum

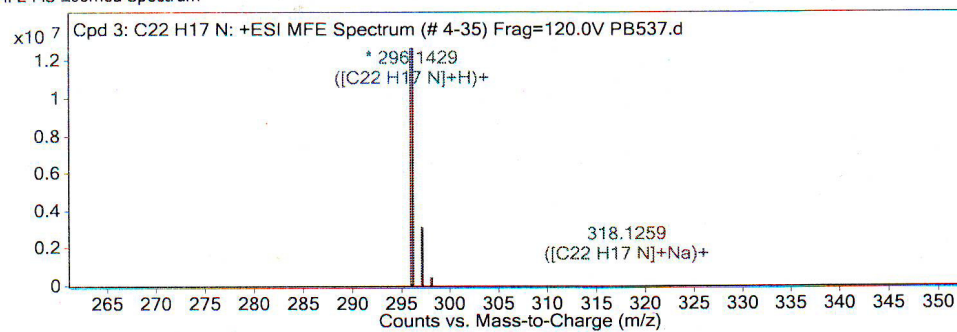

<sup>1</sup>H NMR

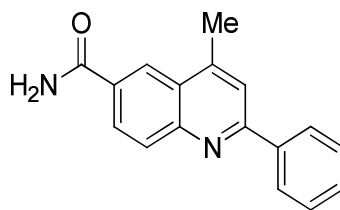

4-Methyl-2-phenylquinoline-6-carboxamide (8d)

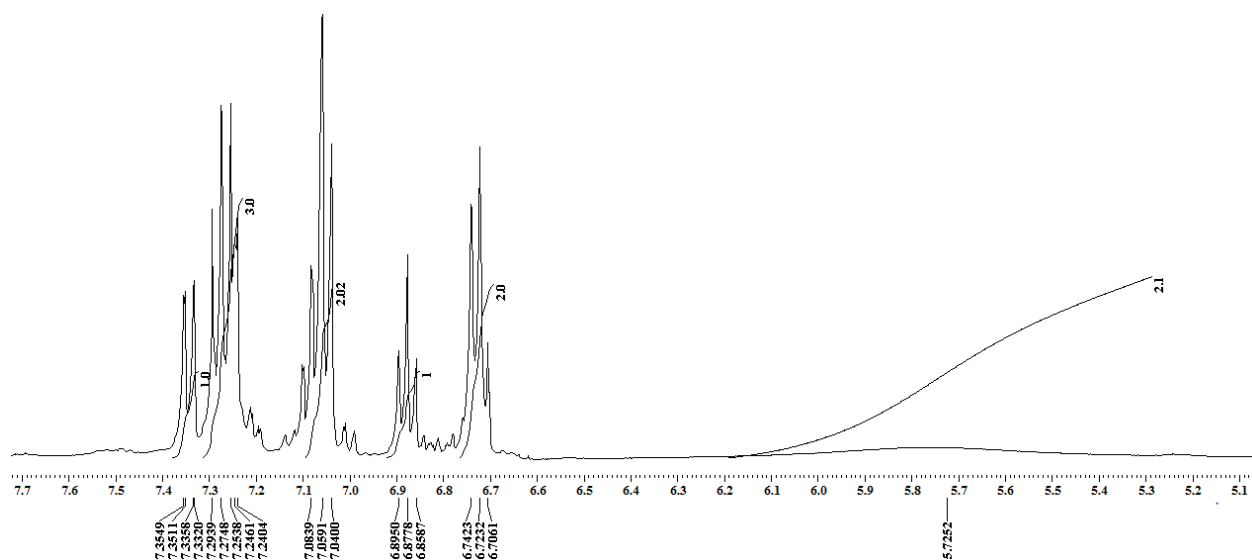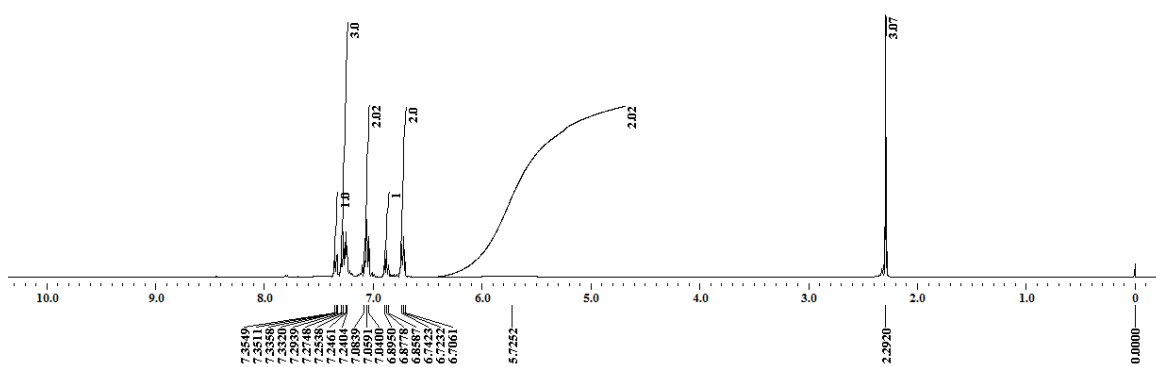

<sup>13</sup>C NMR

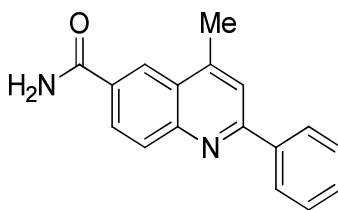

4-Methyl-2-phenylquinoline-6-carboxamide (8d)

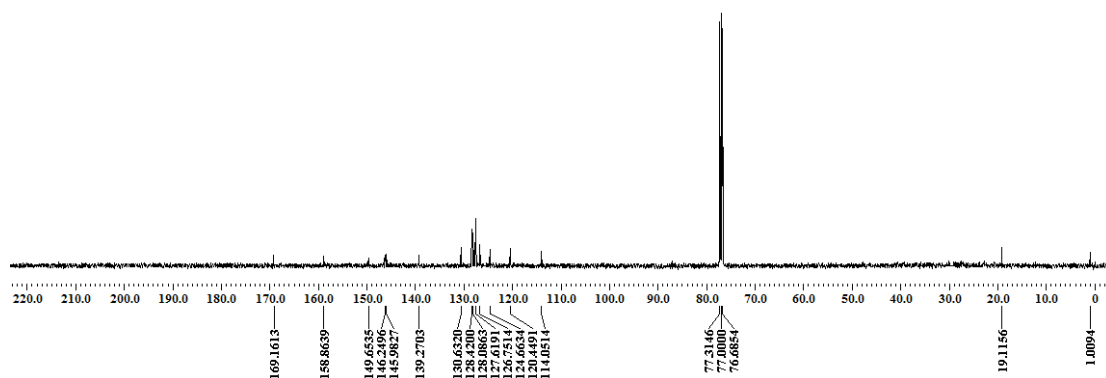

# HRMS



**4-Methyl-2-phenylquinoline-6-carboxamide (8d)**

| Sample Name   | Position     | Instrument Name | User Name              |
|---------------|--------------|-----------------|------------------------|
| VG-521        | P1-C4        | Instrument 1    |                        |
| Inj Vol       | InjPosition  | SampleType      | IRM Calibration Status |
| 1             |              | Sample          | Success                |
| Data Filename | ACQ Method   | Comment         | Acquired Time          |
| VG-521.d      | 29.10.2014.m |                 | 27-04-2017 13:47:46    |

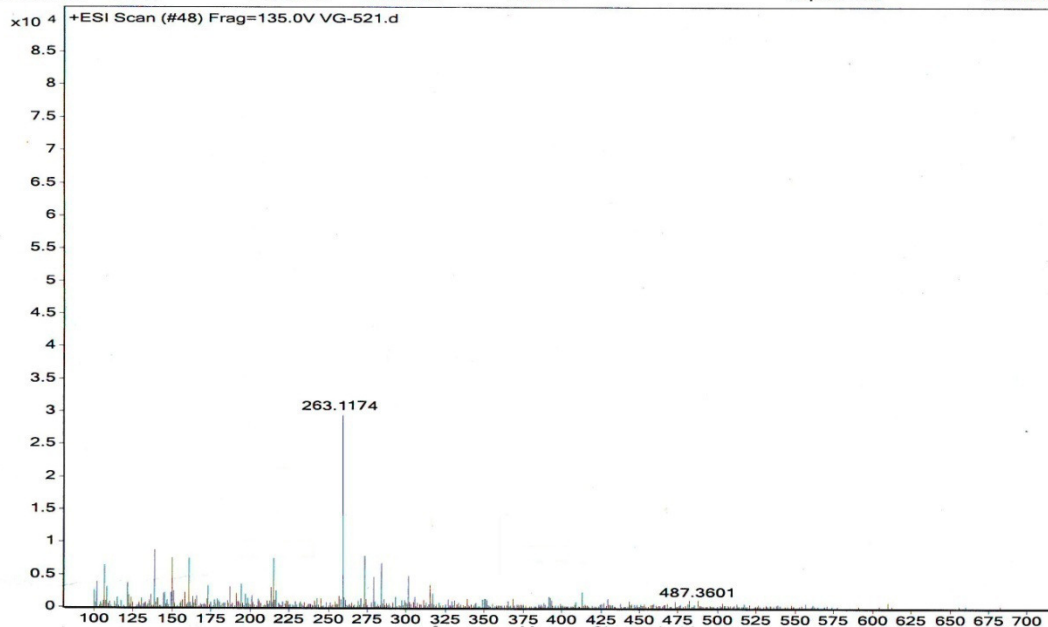



<sup>1</sup>H NMR

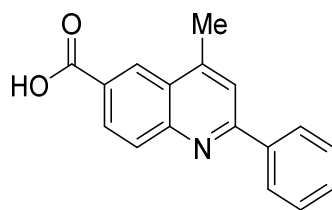

4-Methyl-2-phenylquinoline-6-carboxylic acid (8e)

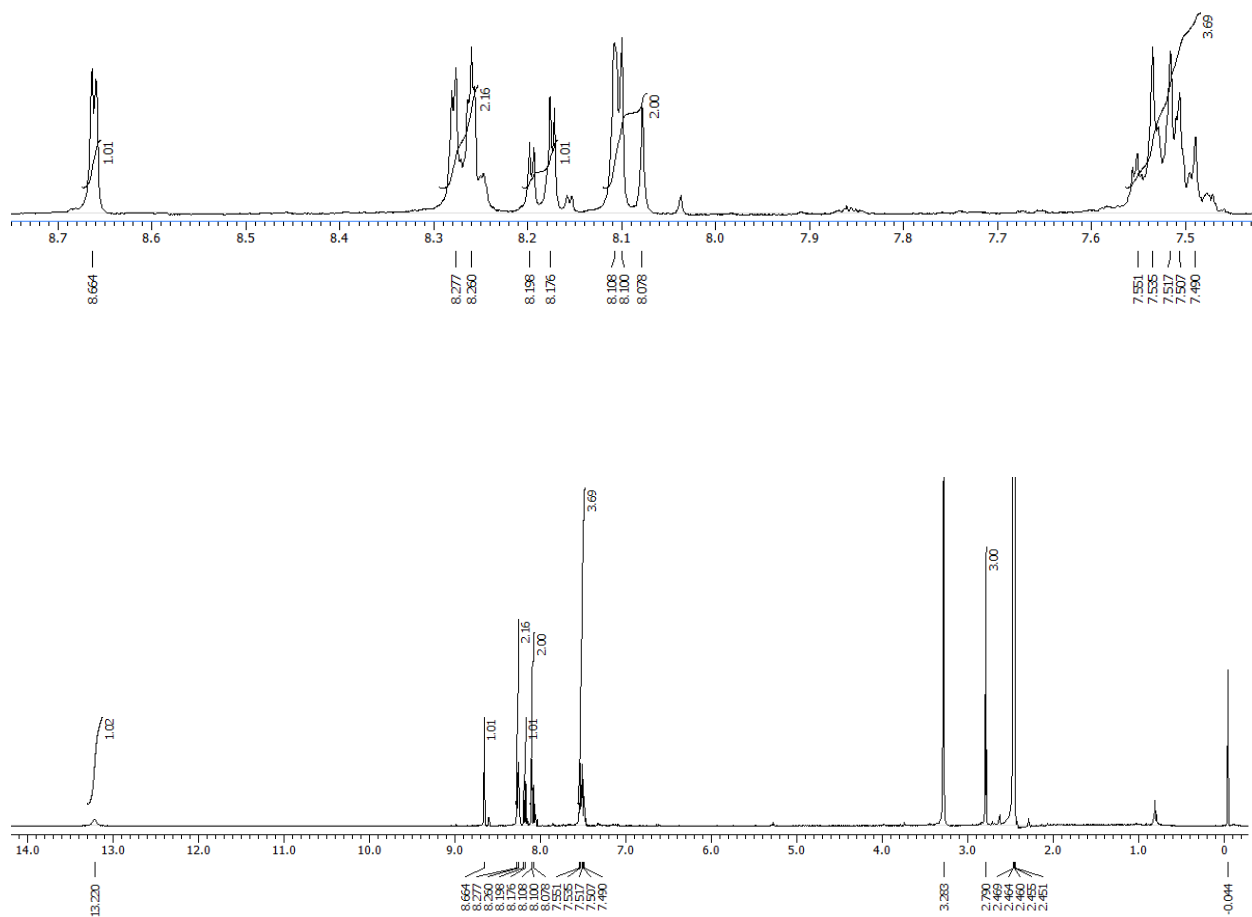

<sup>13</sup>C NMR



4-Methyl-2-phenylquinoline-6-carboxylic acid (8e)

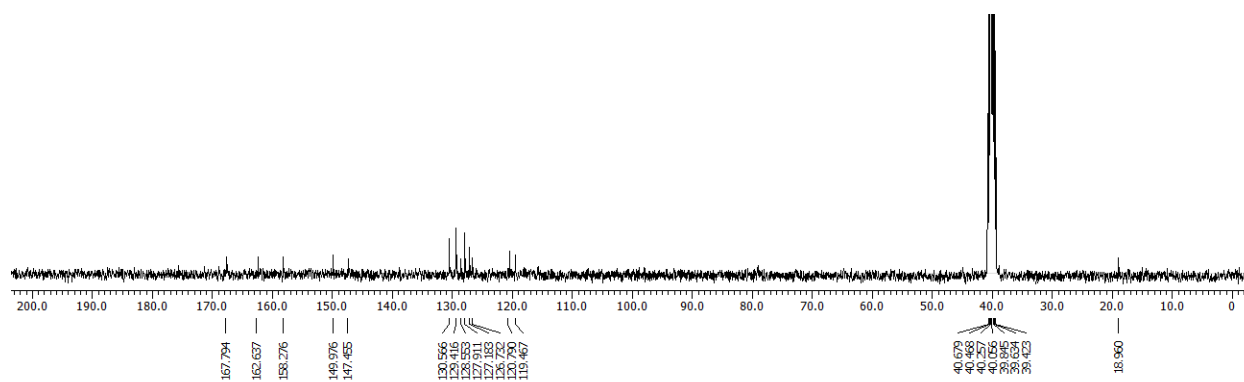

## HRMS

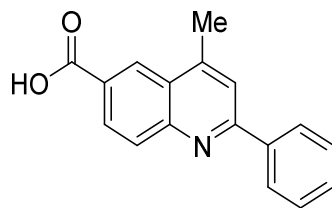

**4-Methyl-2-phenylquinoline-6-carboxylic acid (8e)**

|               |            |             |           |                 |              |                        |                     |
|---------------|------------|-------------|-----------|-----------------|--------------|------------------------|---------------------|
| Sample Name   | VG-PB-17   | Position    | PI-B4     | Instrument Name | Instrument 1 | User Name              |                     |
| Inj Vol       | 2          | InjPosition |           | SampleType      | Sample       | IRM Calibration Status | Success             |
| Data Filename | VG-PB-17.d | ACQ Method  | Damo JK.m | Comment         |              | Acquired Time          | 12-06-2019 13:03:07 |

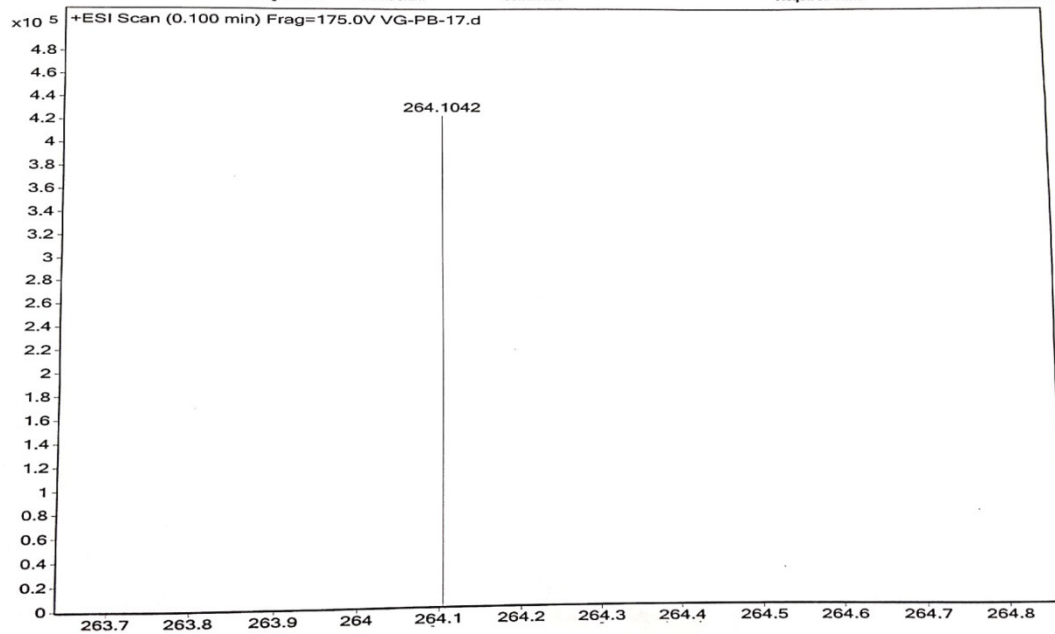

## HRMS of Plausible Intermediates

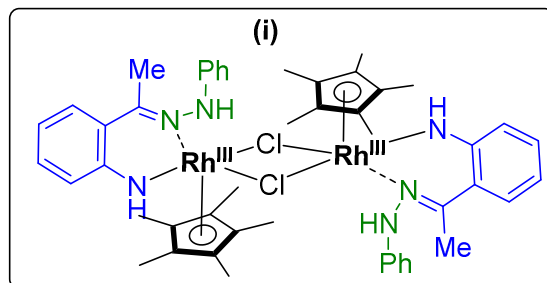

|               |                  |             |           |                 |              |                        |                     |
|---------------|------------------|-------------|-----------|-----------------|--------------|------------------------|---------------------|
| Sample Name   | VG-PB-RH-DIMER   | Position    | P1-C6     | Instrument Name | Instrument 1 | User Name              |                     |
| Inj Vol       | 5                | InjPosition |           | SampleType      | Sample       | IRM Calibration Status | Success             |
| Data Filename | VG-PB-RH-DIMER.d | ACQ Method  | Demo_JK.m | Comment         |              | Acquired Time          | 10-07-2019 11:56:43 |

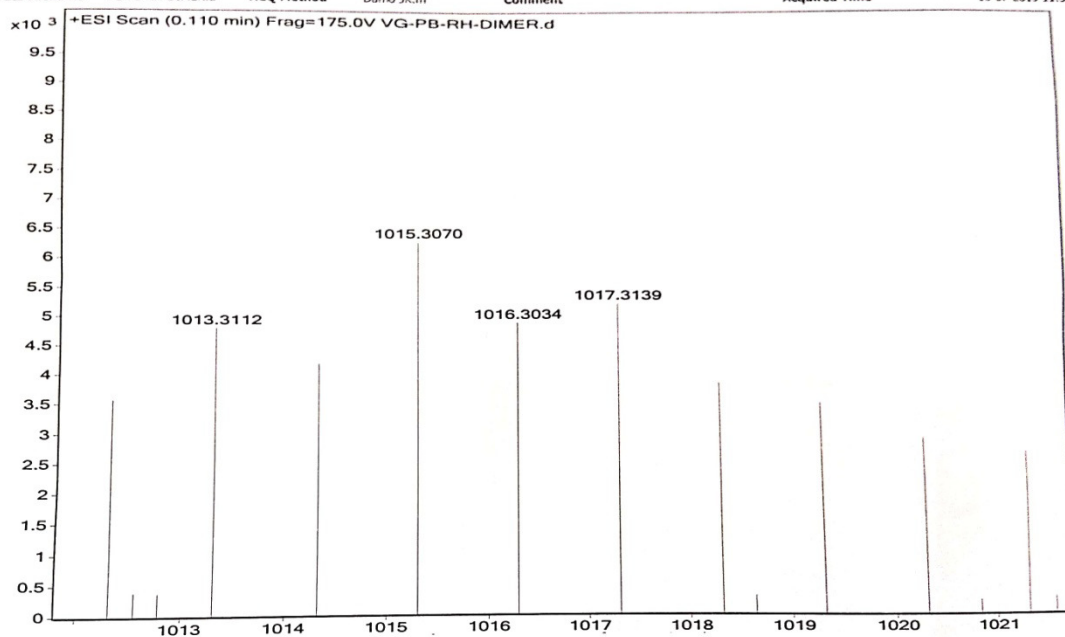

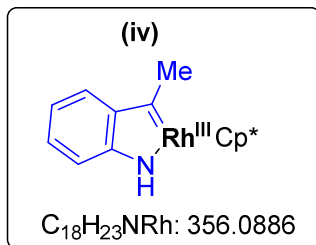

| Sample Name   | VG-RH   | Position    | P1-C1     | Instrument Name | Instrument 1 | User Name              |                     |
|---------------|---------|-------------|-----------|-----------------|--------------|------------------------|---------------------|
| Inj Vol       | 1       | InjPosition |           | SampleType      | Sample       | IRM Calibration Status | Success             |
| Data Filename | VG-RH.d | ACQ Method  | Damo JK.m | Comment         |              | Acquired Time          | 24-05-2019 14:52:03 |

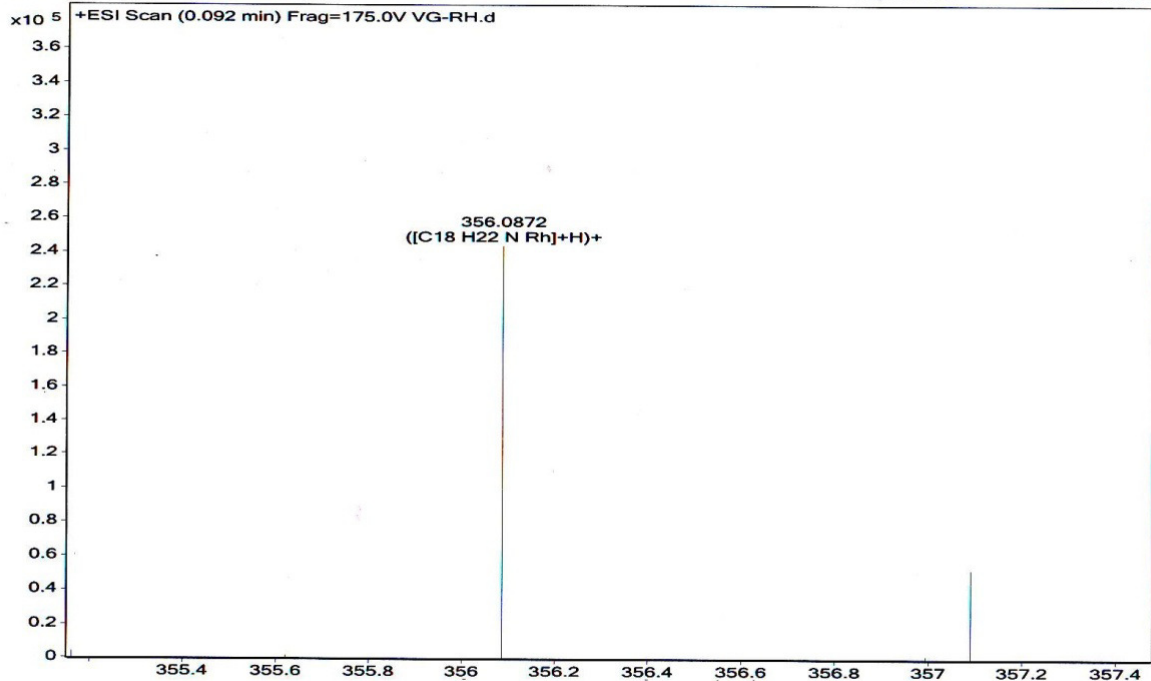

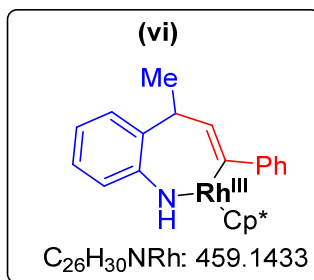

## Qualitative Compound Report

**Data File** VGPB-15-PH-1.d **Sample Name** VGPB-15-PH-1  
**Sample Type** Sample **Position** P1-E2  
**Instrument Name** Instrument 1 **User Name**  
**Acq Method** Demo JK.m **Acquired Time** 31-05-2019 16:43:50  
**IRM Calibration Status** Success **DA Method** Default.m  
**Comment**

**Sample Group** Info.  
**Acquisition SW** 6200 series TOF/6500 series  
**Version** Q-TOF B.05.01 (B5125.1)

### Compound Table

| Compound Label | RT    | Mass     | MFG Formula |
|----------------|-------|----------|-------------|
| Cpd 10: 0.088  | 0.088 | 458.1212 | <none>      |

| Compound Label | m/z      | RT    | Algorithm                 | Mass     |
|----------------|----------|-------|---------------------------|----------|
| Cpd 10: 0.088  | 459.1285 | 0.088 | Find by Molecular Feature | 458.1212 |

### MFE MS Spectrum

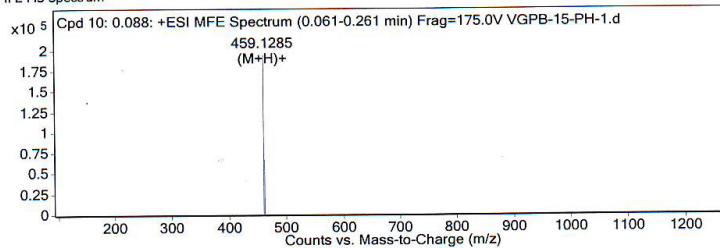

### MFE MS Zoomed Spectrum

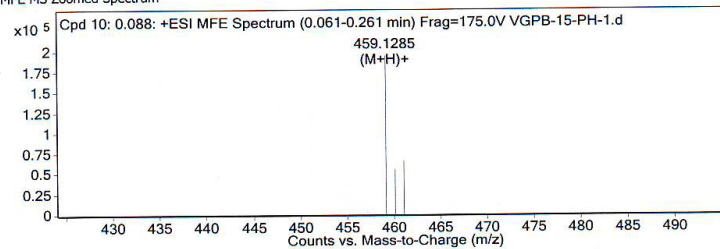

### MS Spectrum Peak List

| m/z      | z | Abund     | Ion    |
|----------|---|-----------|--------|
| 459.1285 | 1 | 193433.14 | (M+H)+ |
| 460.1308 | 1 | 55951.11  | (M+H)+ |
| 461.1277 | 1 | 66064.84  | (M+H)+ |
